# Supplementary material for: Filopodia-like protrusions of adjacent somatic cells shape the developmental potential of oocytes
Source: Life Sci Alliance. 2023 Mar 21;6(6):e202301963. doi: 10.26508/lsa.202301963 (PMC10029974; doi:10.26508/lsa.202301963)
Supplement: Supplementary file 4 [file LSA-2023-01963_TableS1.xlsx]

## Sheet: raw data
GeneID	Gene description	Gene name	Gene type	log2(FC)	P-value	(- Log10 (P-value)	P-adj	KO1	KO2	KO3	HET1	HET2	HET3	Base mean	StdErr	Wald-Stats
ENSMUSG00000001642	aldo-keto reductase family 1, member B3 (aldose reductase) [Source:MGI Symbol;Acc:MGI:1353494]	Akr1b3	protein_coding	4.34209	1.32424e-148	147.878	2.17003e-144	1232	1549	1185	45	39	40	710.324	0.167247	25.9622
ENSMUSG00000035399	oxidative stress responsive serine rich 1 [Source:MGI Symbol;Acc:MGI:1913930]	Oser1	protein_coding	2.63911	1.41995e-133	132.848	1.16344e-129	4334	5767	4498	765	910	711	2907.13	0.107301	24.5953
ENSMUSG00000083899	predicted gene 12346 [Source:MGI Symbol;Acc:MGI:3649810]	Gm12346	transcribed_processed_pseudogene	2.50312	2.50222e-118	117.602	1.36679e-114	4921	5953	4925	839	1148	878	3197.65	0.108235	23.1266
ENSMUSG00000084133	predicted gene 12856 [Source:MGI Symbol;Acc:MGI:3649664]	Gm12856	processed_pseudogene	3.34051	5.64036e-96	95.2487	2.31072e-92	1014	1278	996	88	79	85	612.046	0.160699	20.7873
ENSMUSG00000096276	predicted gene 2042 [Source:MGI Symbol;Acc:MGI:3800544]	Gm2042	protein_coding	2.75396	6.19299e-83	82.2081	2.02969e-79	1148	1537	1435	171	208	177	803.927	0.142747	19.2926
ENSMUSG00000089999	predicted gene 6485 [Source:MGI Symbol;Acc:MGI:3644007]	Gm6485	transcribed_processed_pseudogene	4.12613	8.46165e-82	81.0725	2.31102e-78	501	564	510	3	5	8	278.314	0.215385	19.157
ENSMUSG00000086583	predicted pseudogene 15500 [Source:MGI Symbol;Acc:MGI:3782947]	Gm15500	transcribed_processed_pseudogene	3.1858	4.41811e-75	74.3548	1.03428e-71	666	911	696	53	67	60	422.768	0.173763	18.3342
ENSMUSG00000096576	oogenesin 1 [Source:MGI Symbol;Acc:MGI:2679150]	Oog1	protein_coding	2.96497	1.05494e-71	70.9768	2.16091e-68	1453	1593	1239	155	127	153	817.341	0.165583	17.9062
ENSMUSG00000083283	predicted pseudogene 15361 [Source:MGI Symbol;Acc:MGI:3642247]	Gm15361	processed_pseudogene	3.19516	5.82987e-71	70.2343	1.06149e-67	677	802	675	57	49	55	401.356	0.179395	17.8108
ENSMUSG00000021270	heat shock protein 90, alpha (cytosolic), class A member 1 [Source:MGI Symbol;Acc:MGI:96250]	Hsp90aa1	protein_coding	2.17257	3.95301e-67	66.4031	6.4778e-64	6256	7452	6398	1318	1896	1280	4201.23	0.125509	17.31
ENSMUSG00000084353	predicted gene 15452 [Source:MGI Symbol;Acc:MGI:3768636]	Gm15452	processed_pseudogene	3.54683	1.73011e-65	64.7619	2.5774e-62	534	610	449	20	19	15	286.623	0.207526	17.0911
ENSMUSG00000091989	NADH:ubiquinone oxidoreductase subunit AB1b [Source:MGI Symbol;Acc:MGI:4936891]	Ndufab1-ps	processed_pseudogene	3.53838	2.16936e-61	60.6637	2.96244e-58	405	497	397	14	12	9	232.06	0.214036	16.5317
ENSMUSG00000083626	predicted gene 4459 [Source:MGI Symbol;Acc:MGI:3782643]	Gm4459	processed_pseudogene	3.28357	5.96596e-54	53.2243	7.52032e-51	497	525	454	22	25	13	268.094	0.212321	15.4651
ENSMUSG00000066027	predicted gene 10436 [Source:MGI Symbol;Acc:MGI:3704393]	Gm10436	protein_coding	1.62098	9.3609e-54	53.0287	1.09569e-50	9846	11448	9018	3591	3795	3117	6914.48	0.105012	15.4361
ENSMUSG00000048076	ADP-ribosylation factor 1 [Source:MGI Symbol;Acc:MGI:99431]	Arf1	protein_coding	1.2116	3.39791e-52	51.4688	3.7121e-49	9078	12352	9668	4565	5375	4867	7685.19	0.0796966	15.2026
ENSMUSG00000070686	expressed sequence C87414 [Source:MGI Symbol;Acc:MGI:2141341]	C87414	protein_coding	2.1775	7.23022e-51	50.1408	7.4051e-48	1459	1797	1381	262	392	321	957.722	0.145157	15.001
ENSMUSG00000063412	predicted pseudogene 10131 [Source:MGI Symbol;Acc:MGI:3704308]	Gm10131	protein_coding	2.855	8.76153e-51	50.0574	8.4456e-48	712	898	712	58	98	58	437.372	0.190482	14.9883
ENSMUSG00000095588	predicted gene 12350 [Source:MGI Symbol;Acc:MGI:3649478]	Gm12350	processed_pseudogene	3.07143	7.70047e-49	48.1135	7.01042e-46	572	708	502	39	24	36	325.848	0.209112	14.688
ENSMUSG00000081485	predicted gene 12338 [Source:MGI Symbol;Acc:MGI:3650622]	Gm12338	processed_pseudogene	3.40676	8.71842e-49	48.0596	7.51941e-46	289	304	288	0	0	0	154.68	0.232076	14.6795
ENSMUSG00000032959	phosphatidylethanolamine binding protein 1 [Source:MGI Symbol;Acc:MGI:1344408]	Pebp1	protein_coding	2.63468	7.95356e-48	47.0994	6.51675e-45	650	1007	779	103	87	100	467.009	0.181341	14.5289
ENSMUSG00000082896	predicted gene 5844 [Source:MGI Symbol;Acc:MGI:3645252]	Gm5844	processed_pseudogene	2.1567	5.68802e-45	44.245	4.43855e-42	1110	1306	1209	221	315	220	749.973	0.153267	14.0715
ENSMUSG00000035242	ornithine decarboxylase antizyme 1 [Source:MGI Symbol;Acc:MGI:109433]	Oaz1	protein_coding	2.91927	2.24845e-44	43.6481	1.67479e-41	447	570	442	37	24	34	268.984	0.208908	13.9739
ENSMUSG00000068749	proteasome (prosome, macropain) subunit, alpha type 5 [Source:MGI Symbol;Acc:MGI:1347009]	Psma5	protein_coding	2.36899	6.43651e-43	42.1913	4.58588e-40	534	789	646	97	113	103	390.017	0.172503	13.7331
ENSMUSG00000081344	predicted gene 14303 [Source:MGI Symbol;Acc:MGI:3651379]	Gm14303	processed_pseudogene	2.17613	4.4723e-42	41.3495	3.05365e-39	1070	1087	910	206	223	183	632.62	0.160105	13.5919
ENSMUSG00000086324	predicted gene 15564 [Source:MGI Symbol;Acc:MGI:3783013]	Gm15564	antisense	2.55156	7.15344e-42	41.1455	4.68894e-39	541	595	596	64	89	61	336.654	0.188203	13.5575
ENSMUSG00000105589	F-box and WD-40 domain protein 14 [Source:MGI Symbol;Acc:MGI:1354703]	Fbxw14	protein_coding	1.38087	1.93346e-41	40.7137	1.2186e-38	7688	9205	7290	3455	3253	3273	5764.24	0.102405	13.4844
ENSMUSG00000024121	ATPase, H+ transporting, lysosomal V0 subunit C [Source:MGI Symbol;Acc:MGI:88116]	Atp6v0c	protein_coding	1.99804	1.56425e-40	39.8057	9.49383e-38	896	1241	982	208	291	241	655.599	0.149899	13.3293
ENSMUSG00000037570	microspherule protein 1 [Source:MGI Symbol;Acc:MGI:1858420]	Mcrs1	protein_coding	2.82852	1.20181e-39	38.9202	7.0336e-37	276	387	344	22	21	20	185.02	0.214667	13.1763
ENSMUSG00000071414	predicted gene 6736 [Source:MGI Symbol;Acc:MGI:3643048]	Gm6736	processed_pseudogene	3.0738	2.1913e-39	38.6593	1.23824e-36	219	319	223	0	0	1	132.056	0.234089	13.1309
ENSMUSG00000046711	high mobility group AT-hook 1 [Source:MGI Symbol;Acc:MGI:96160]	Hmga1	protein_coding	2.32874	2.58268e-39	38.5879	1.41074e-36	581	653	688	91	106	113	384.934	0.177517	13.1184
ENSMUSG00000092073	predicted gene 6205 [Source:MGI Symbol;Acc:MGI:3779572]	Gm6205	protein_coding	2.38244	7.77949e-39	38.109	4.11234e-36	655	876	752	121	131	86	449.74	0.182778	13.0346
ENSMUSG00000054087	F-box and WD-40 domain protein 28 [Source:MGI Symbol;Acc:MGI:3779847]	Fbxw28	protein_coding	1.07408	5.14673e-38	37.2885	2.63561e-35	9190	11950	9647	5402	5498	5212	7848.62	0.0833285	12.8897
ENSMUSG00000083261	predicted pseudogene 7816 [Source:MGI Symbol;Acc:MGI:3646286]	Gm7816	processed_pseudogene	2.50787	1.40893e-37	36.8511	6.99639e-35	456	677	444	60	71	55	301.537	0.195748	12.8118
ENSMUSG00000020528	phosphoribosyl pyrophosphate synthetase-associated protein 2 [Source:MGI Symbol;Acc:MGI:2384838]	Prpsap2	protein_coding	1.52625	4.58033e-37	36.3391	2.20759e-34	1300	1637	1267	476	540	511	967.673	0.119989	12.72
ENSMUSG00000108045	predicted pseudogene 5576 [Source:MGI Symbol;Acc:MGI:3644832]	Gm5576	processed_pseudogene	2.14501	4.93337e-37	36.3069	2.3098e-34	522	669	539	104	127	108	353.57	0.16871	12.7142
ENSMUSG00000028156	eukaryotic translation initiation factor 4E [Source:MGI Symbol;Acc:MGI:95305]	Eif4e	protein_coding	1.36517	1.00906e-36	35.9961	4.59317e-34	3306	3912	3539	1491	1424	1558	2572.55	0.10785	12.6581
ENSMUSG00000082793	predicted gene 9308 [Source:MGI Symbol;Acc:MGI:3647522]	Gm9308	processed_pseudogene	2.83582	1.50287e-35	34.8231	6.52188e-33	223	290	221	8	8	9	131.637	0.227882	12.4443
ENSMUSG00000063480	SNU13 homolog, small nuclear ribonucleoprotein (U4/U6.U5) [Source:MGI Symbol;Acc:MGI:893586]	Snu13	protein_coding	2.25329	1.51237e-35	34.8203	6.52188e-33	615	770	595	118	124	89	396.116	0.181078	12.4437
ENSMUSG00000031783	polymerase (RNA) II (DNA directed) polypeptide C [Source:MGI Symbol;Acc:MGI:109299]	Polr2c	protein_coding	1.96242	5.27941e-35	34.2774	2.2183e-32	2285	2675	2424	672	485	580	1561.9	0.158984	12.3435
ENSMUSG00000079523	thymosin, beta 10 [Source:MGI Symbol;Acc:MGI:109146]	Tmsb10	protein_coding	2.56253	6.78551e-35	34.1684	2.77985e-32	420	434	385	32	53	36	235.955	0.207941	12.3233
ENSMUSG00000081911	mitochondrial ribosomal protein S36, pseudogene 2 [Source:MGI Symbol;Acc:MGI:3704298]	Mrps36-ps2	processed_pseudogene	2.81241	1.70092e-34	33.7693	6.7983e-32	281	284	227	8	11	6	142.812	0.229604	12.249
ENSMUSG00000066551	high mobility group box 1 [Source:MGI Symbol;Acc:MGI:96113]	Hmgb1	protein_coding	2.49213	2.07529e-34	33.6829	8.09708e-32	342	392	347	35	48	36	207.423	0.203725	12.2328
ENSMUSG00000114579	predicted gene 4130 [Source:MGI Symbol;Acc:MGI:3782306]	Gm4130	processed_pseudogene	2.86036	3.27151e-34	33.4853	1.24675e-31	194	265	205	0	2	2	116.049	0.234536	12.1958
ENSMUSG00000018362	karyopherin (importin) alpha 2 [Source:MGI Symbol;Acc:MGI:103561]	Kpna2	protein_coding	1.49603	8.99115e-34	33.0462	3.34859e-31	1213	1645	1336	490	577	482	967.937	0.123504	12.1132
ENSMUSG00000021631	mitichondrial ribosomal protein S36, pseudogene 1 [Source:MGI Symbol;Acc:MGI:3809201]	Mrps36-ps1	processed_pseudogene	2.3263	1.1427e-33	32.9421	4.1612e-31	670	632	517	83	104	79	360.784	0.192359	12.0935
ENSMUSG00000027708	DCN1, defective in cullin neddylation 1, domain containing 1 (S. cerevisiae) [Source:MGI Symbol;Acc:MGI:2150386]	Dcun1d1	protein_coding	1.14472	2.91173e-33	32.5358	1.03727e-30	4051	4505	4485	1979	2364	2152	3285.73	0.095263	12.0165
ENSMUSG00000112825	predicted gene 9118 [Source:MGI Symbol;Acc:MGI:3648185]	Gm9118	processed_pseudogene	2.71275	6.28093e-33	32.202	2.18991e-30	272	297	262	15	15	8	151.496	0.226956	11.9528
ENSMUSG00000074553	eukaryotic translation initiation factor 1, pseudogene 1 [Source:MGI Symbol;Acc:MGI:3642383]	Eif1-ps1	processed_pseudogene	2.70724	1.00336e-32	31.9985	3.35736e-30	259	367	312	16	19	8	169.729	0.227236	11.9138
ENSMUSG00000015656	heat shock protein 8 [Source:MGI Symbol;Acc:MGI:105384]	Hspa8	protein_coding	1.24612	1.00391e-32	31.9983	3.35736e-30	2366	3019	2619	1168	1379	1106	1957.78	0.104595	11.9137
ENSMUSG00000058922	predicted pseudogene 10052 [Source:MGI Symbol;Acc:MGI:3704348]	Gm10052	processed_pseudogene	2.65822	2.8693e-32	31.5422	9.40386e-30	240	351	275	14	22	12	157.633	0.22478	11.8259
ENSMUSG00000029451	predicted gene 13103 [Source:MGI Symbol;Acc:MGI:3650203]	Gm13103	protein_coding	0.938579	4.10334e-32	31.3869	1.31846e-29	9435	12299	9538	5556	6715	5857	8230.24	0.079569	11.7958
ENSMUSG00000075268	predicted gene 10819 [Source:MGI Symbol;Acc:MGI:3642135]	Gm10819	processed_pseudogene	2.76409	5.95012e-32	31.2255	1.85815e-29	168	253	199	1	2	1	108.142	0.234953	11.7645
ENSMUSG00000042079	heterogeneous nuclear ribonucleoprotein F [Source:MGI Symbol;Acc:MGI:2138741]	Hnrnpf	protein_coding	2.17477	6.00976e-32	31.2211	1.85815e-29	393	485	419	68	86	73	261.31	0.184872	11.7636
ENSMUSG00000041431	cyclin B1 [Source:MGI Symbol;Acc:MGI:88302]	Ccnb1	protein_coding	1.04913	7.12441e-32	31.1473	2.16199e-29	9362	12536	9605	5298	5591	5814	8054.96	0.0892931	11.7493
ENSMUSG00000031320	ribosomal protein S4, X-linked [Source:MGI Symbol;Acc:MGI:98158]	Rps4x	protein_coding	2.57651	5.24292e-31	30.2804	1.53421e-28	489	477	306	32	33	23	236.622	0.222509	11.5794
ENSMUSG00000026999	nucleoporin 35 [Source:MGI Symbol;Acc:MGI:1916732]	Nup35	protein_coding	1.75984	5.17712e-31	30.2859	1.53421e-28	1147	1422	1102	370	316	351	800.676	0.151966	11.5805
ENSMUSG00000091512	late endosomal/lysosomal adaptor, MAPK and MTOR activator 3 [Source:MGI Symbol;Acc:MGI:1929467]	Lamtor3	protein_coding	1.17565	2.63236e-29	28.5797	7.56779e-27	2161	2886	2326	1174	1199	1151	1827	0.104608	11.2387
ENSMUSG00000068200	predicted pseudogene 5931 [Source:MGI Symbol;Acc:MGI:3647036]	Gm5931	processed_pseudogene	2.46107	8.86346e-29	28.0524	2.50423e-26	226	322	249	23	23	18	148.284	0.2211	11.131
ENSMUSG00000105416	predicted gene 42553 [Source:MGI Symbol;Acc:MGI:5662690]	Gm42553	TEC	2.56322	1.09012e-28	27.9625	3.02776e-26	254	302	225	16	9	9	141.601	0.23066	11.1125
ENSMUSG00000113263	predicted gene 4811 [Source:MGI Symbol;Acc:MGI:3648985]	Gm4811	processed_pseudogene	2.61013	1.19068e-28	27.9242	3.25194e-26	217	223	203	5	1	3	114.353	0.235049	11.1047
ENSMUSG00000083396	predicted gene 15542 [Source:MGI Symbol;Acc:MGI:3782990]	Gm15542	processed_pseudogene	1.69821	4.29341e-28	27.3672	1.15338e-25	1097	1487	1251	318	482	341	842.021	0.15453	10.9895
ENSMUSG00000114540	predicted pseudogene 6421 [Source:MGI Symbol;Acc:MGI:3647311]	Gm6421	processed_pseudogene	2.36288	7.79599e-28	27.1081	2.06053e-25	273	323	258	32	27	28	162.636	0.216074	10.9355
ENSMUSG00000112808	predicted gene 4739 [Source:MGI Symbol;Acc:MGI:3642984]	Gm4739	processed_pseudogene	1.62181	4.27524e-27	26.369	1.11204e-24	2054	2482	1857	708	785	541	1428.02	0.150445	10.7801
ENSMUSG00000021660	basic transcription factor 3 [Source:MGI Symbol;Acc:MGI:1202875]	Btf3	protein_coding	1.79361	4.36765e-27	26.3598	1.11832e-24	677	833	606	175	216	168	454.589	0.166412	10.7781
ENSMUSG00000027342	proliferating cell nuclear antigen [Source:MGI Symbol;Acc:MGI:97503]	Pcna	protein_coding	1.6578	1.20754e-26	25.9181	3.04431e-24	621	819	753	221	226	221	485.56	0.155165	10.6841
ENSMUSG00000021520	ubiquinol-cytochrome c reductase binding protein [Source:MGI Symbol;Acc:MGI:1914780]	Uqcrb	protein_coding	2.4593	1.55125e-26	25.8093	3.85156e-24	257	230	208	14	12	10	128.122	0.230684	10.6609
ENSMUSG00000031311	non-POU-domain-containing, octamer binding protein [Source:MGI Symbol;Acc:MGI:1855692]	Nono	protein_coding	1.02615	1.83115e-26	25.7373	4.47866e-24	3027	3993	3401	1647	2122	1855	2678.96	0.0963935	10.6454
ENSMUSG00000021248	transmembrane p24 trafficking protein 10 [Source:MGI Symbol;Acc:MGI:1915831]	Tmed10	protein_coding	1.39489	5.73969e-26	25.2411	1.38318e-23	1218	1571	1125	468	550	519	917.393	0.132362	10.5385
ENSMUSG00000066878	predicted pseudogene 10184 [Source:MGI Symbol;Acc:MGI:3704480]	Gm10184	protein_coding	1.61431	9.18145e-26	25.0371	2.18053e-23	1058	1304	1073	360	435	297	767.117	0.153828	10.4942
ENSMUSG00000025156	G protein pathway suppressor 1 [Source:MGI Symbol;Acc:MGI:2384801]	Gps1	protein_coding	1.7944	2.02634e-25	24.6933	4.74366e-23	537	580	502	127	143	149	348.285	0.17222	10.4192
ENSMUSG00000026021	small ubiquitin-like modifier 1 [Source:MGI Symbol;Acc:MGI:1197010]	Sumo1	protein_coding	1.75884	2.19667e-25	24.6582	5.06998e-23	556	689	536	165	169	144	384.261	0.168932	10.4115
ENSMUSG00000114533	predicted gene 8416 [Source:MGI Symbol;Acc:MGI:3648867]	Gm8416	processed_pseudogene	2.43592	2.50336e-25	24.6015	5.69757e-23	158	196	160	5	5	6	92.1448	0.234243	10.3991
ENSMUSG00000022051	BCL2/adenovirus E1B interacting protein 3-like [Source:MGI Symbol;Acc:MGI:1332659]	Bnip3l	protein_coding	1.55653	3.79356e-25	24.421	8.51576e-23	968	1252	1027	372	328	381	733.154	0.150253	10.3594
ENSMUSG00000032897	nuclear transcription factor-Y gamma [Source:MGI Symbol;Acc:MGI:107901]	Nfyc	protein_coding	1.47404	1.01948e-24	23.9916	2.2576e-22	982	1217	981	331	465	362	732.034	0.143607	10.2644
ENSMUSG00000056234	nuclear receptor coactivator 4 [Source:MGI Symbol;Acc:MGI:1350932]	Ncoa4	protein_coding	1.8047	1.1916e-24	23.9239	2.60357e-22	556	719	652	166	187	132	410.834	0.17608	10.2493
ENSMUSG00000070372	capping protein (actin filament) muscle Z-line, alpha 1 [Source:MGI Symbol;Acc:MGI:106227]	Capza1	protein_coding	2.37919	2.2544e-24	23.647	4.8609e-22	332	275	305	17	7	17	167.869	0.233539	10.1875
ENSMUSG00000070034	Sp110 nuclear body protein [Source:MGI Symbol;Acc:MGI:1923364]	Sp110	protein_coding	1.57631	2.4487e-24	23.6111	5.21127e-22	679	858	775	216	300	241	519.6	0.154852	10.1795
ENSMUSG00000037278	transmembrane protein 97 [Source:MGI Symbol;Acc:MGI:1916321]	Tmem97	protein_coding	1.29717	9.95688e-24	23.0019	2.09184e-21	2366	3048	3079	1144	1163	1306	2041.69	0.129174	10.0421
ENSMUSG00000097906	predicted gene 9625 [Source:MGI Symbol;Acc:MGI:3780033]	Gm9625	processed_pseudogene	2.15805	1.2192e-23	22.9139	2.52899e-21	222	345	286	32	42	36	164.81	0.21533	10.0221
ENSMUSG00000008892	voltage-dependent anion channel 3 [Source:MGI Symbol;Acc:MGI:106922]	Vdac3	protein_coding	1.24887	3.14489e-23	22.5024	6.44192e-21	1578	2097	1612	773	746	813	1280.12	0.125792	9.928
ENSMUSG00000029390	transmembrane p24 trafficking protein 2 [Source:MGI Symbol;Acc:MGI:1929269]	Tmed2	protein_coding	1.65613	3.9719e-23	22.401	8.03549e-21	670	734	641	193	240	173	451.328	0.167206	9.90469
ENSMUSG00000093674	ribosomal protein L41 [Source:MGI Symbol;Acc:MGI:1915195]	Rpl41	protein_coding	1.82604	4.17079e-23	22.3798	8.33496e-21	446	517	427	113	123	94	293.816	0.184452	9.89981
ENSMUSG00000038646	RNA guanine-7 methyltransferase activating subunit [Source:MGI Symbol;Acc:MGI:1914398]	Ramac	protein_coding	1.60962	9.68312e-23	22.014	1.91177e-20	663	801	625	195	260	193	463.852	0.163993	9.81522
ENSMUSG00000044424	predicted gene 9493 [Source:MGI Symbol;Acc:MGI:3779903]	Gm9493	protein_coding	2.31292	1.00243e-22	21.9989	1.95557e-20	240	185	161	1	4	3	104.981	0.235731	9.81172
ENSMUSG00000081094	ribosomal protein L19, pseudogene 11 [Source:MGI Symbol;Acc:MGI:3642193]	Rpl19-ps11	processed_pseudogene	2.21485	1.31109e-22	21.8824	2.52762e-20	216	238	200	23	20	17	123.815	0.22636	9.7846
ENSMUSG00000037742	eukaryotic translation elongation factor 1 alpha 1 [Source:MGI Symbol;Acc:MGI:1096881]	Eef1a1	protein_coding	1.42292	2.09159e-22	21.6795	3.98544e-20	1362	1302	1240	499	494	481	914.864	0.146131	9.73724
ENSMUSG00000063524	enolase 1, alpha non-neuron [Source:MGI Symbol;Acc:MGI:95393]	Eno1	protein_coding	2.08029	2.36799e-22	21.6256	4.46026e-20	269	311	255	34	39	47	164.459	0.21392	9.72462
ENSMUSG00000113858	predicted gene 4057 [Source:MGI Symbol;Acc:MGI:3782232]	Gm4057	processed_pseudogene	1.92683	7.16577e-22	21.1447	1.33438e-19	544	599	473	122	86	105	331.493	0.200476	9.61127
ENSMUSG00000054717	high mobility group box 2 [Source:MGI Symbol;Acc:MGI:96157]	Hmgb2	protein_coding	1.32426	1.09913e-21	20.959	2.02376e-19	2357	2840	2079	1003	1152	837	1728.91	0.138417	9.56713
ENSMUSG00000027170	eukaryotic translation initiation factor 3, subunit M [Source:MGI Symbol;Acc:MGI:1351744]	Eif3m	protein_coding	1.62491	3.01094e-21	20.5213	5.48226e-19	733	876	899	277	231	236	554.483	0.171724	9.46235
ENSMUSG00000043889	predicted gene 8399 [Source:MGI Symbol;Acc:MGI:3647971]	Gm8399	processed_pseudogene	2.22949	3.16923e-21	20.499	5.70705e-19	120	171	139	2	3	3	75.9511	0.23575	9.45699
ENSMUSG00000083670	predicted pseudogene 6829 [Source:MGI Symbol;Acc:MGI:3648590]	Gm6829	processed_pseudogene	2.02464	7.07265e-21	20.1504	1.25978e-18	297	317	236	39	50	37	168.142	0.216016	9.37266
ENSMUSG00000107906	predicted pseudogene 5580 [Source:MGI Symbol;Acc:MGI:3646594]	Gm5580	protein_coding	1.21396	7.7842e-21	20.1088	1.37161e-18	836	1046	877	403	449	398	673.794	0.129661	9.36254
ENSMUSG00000060019	predicted pseudogene 10073 [Source:MGI Symbol;Acc:MGI:3641908]	Gm10073	protein_coding	2.18043	2.25765e-20	19.6463	3.93576e-18	148	143	143	4	5	3	78.2628	0.235737	9.2494
ENSMUSG00000045128	ribosomal protein L18A [Source:MGI Symbol;Acc:MGI:1924058]	Rpl18a	protein_coding	2.00448	3.92767e-20	19.4059	6.77502e-18	384	362	289	56	42	53	205.473	0.218114	9.19002
ENSMUSG00000059796	eukaryotic translation initiation factor 4A1 [Source:MGI Symbol;Acc:MGI:95303]	Eif4a1	protein_coding	1.58005	6.40677e-20	19.1934	1.09362e-17	612	810	635	184	267	183	454.989	0.172924	9.13724
ENSMUSG00000067274	ribosomal protein, large, P0 [Source:MGI Symbol;Acc:MGI:1927636]	Rplp0	protein_coding	1.54243	1.24522e-19	18.9048	2.10364e-17	1074	1339	1168	449	332	356	801.8	0.170151	9.06507
ENSMUSG00000015217	high mobility group box 3 [Source:MGI Symbol;Acc:MGI:1098219]	Hmgb3	protein_coding	1.77268	2.48858e-19	18.604	4.16127e-17	279	355	297	63	78	73	195.232	0.1972	8.98928
ENSMUSG00000075000	nuclear receptor binding factor 2 [Source:MGI Symbol;Acc:MGI:1354950]	Nrbf2	protein_coding	1.54092	2.80401e-19	18.5522	4.64134e-17	430	575	463	137	179	152	327.317	0.171668	8.97615
ENSMUSG00000032294	pyruvate kinase, muscle [Source:MGI Symbol;Acc:MGI:97591]	Pkm	protein_coding	0.660406	3.11363e-19	18.5067	5.10231e-17	4733	5852	5182	3575	3940	3668	4475.72	0.0736681	8.96462
ENSMUSG00000083700	predicted gene 2986 [Source:MGI Symbol;Acc:MGI:3781164]	Gm2986	processed_pseudogene	1.39893	8.48133e-19	18.0715	1.37607e-16	670	701	614	238	272	233	462.586	0.158009	8.8535
ENSMUSG00000018965	tyrosine 3-monooxygenase/tryptophan 5-monooxygenase activation protein, eta polypeptide [Source:MGI Symbol;Acc:MGI:109194]	Ywhah	protein_coding	1.40374	9.36527e-19	18.0285	1.50459e-16	706	1008	688	285	324	275	552.439	0.158751	8.84244
ENSMUSG00000094530	predicted gene, 21399 [Source:MGI Symbol;Acc:MGI:5434754]	Gm21399	processed_pseudogene	1.24766	1.1313e-18	17.9464	1.79987e-16	2619	3246	2366	1234	1050	1259	1982.94	0.141437	8.82131
ENSMUSG00000046580	predicted gene 7862 [Source:MGI Symbol;Acc:MGI:3648002]	Gm7862	processed_pseudogene	1.89494	1.81658e-18	17.7407	2.86233e-16	221	301	252	46	49	35	154.746	0.216117	8.76813
ENSMUSG00000081603	predicted gene 14681 [Source:MGI Symbol;Acc:MGI:3705734]	Gm14681	processed_pseudogene	1.41994	3.16375e-18	17.4998	4.93757e-16	846	904	699	261	351	279	565.466	0.16311	8.70543
ENSMUSG00000099997	tubulin, beta 4B class IVB, pseudogene 2 [Source:MGI Symbol;Acc:MGI:3723458]	Tubb4b-ps2	processed_pseudogene	1.86001	6.85663e-18	17.1639	1.06e-15	239	256	215	40	47	38	143.653	0.215846	8.61728
ENSMUSG00000060373	heterogeneous nuclear ribonucleoprotein C [Source:MGI Symbol;Acc:MGI:107795]	Hnrnpc	protein_coding	0.856777	1.35706e-17	16.8674	2.07833e-15	3557	3984	3326	2215	2252	2143	2921.63	0.10034	8.53873
ENSMUSG00000033307	macrophage migration inhibitory factor (glycosylation-inhibiting factor) [Source:MGI Symbol;Acc:MGI:96982]	Mif	protein_coding	1.74132	1.63201e-17	16.7873	2.47628e-15	437	492	324	75	108	99	261.933	0.204443	8.51738
ENSMUSG00000094392	predicted gene 3788 [Source:MGI Symbol;Acc:MGI:3781961]	Gm3788	processed_pseudogene	1.86705	2.13749e-17	16.6701	3.1556e-15	264	268	215	34	51	38	149.882	0.220014	8.48607
ENSMUSG00000032215	ribosomal L24 domain containing 1 [Source:MGI Symbol;Acc:MGI:2681840]	Rsl24d1	protein_coding	0.958932	2.11038e-17	16.6756	3.1556e-15	1172	1484	1275	703	751	739	1023.8	0.112981	8.48755
ENSMUSG00000027506	tumor protein D52 [Source:MGI Symbol;Acc:MGI:107749]	Tpd52	protein_coding	0.544566	2.13288e-17	16.671	3.1556e-15	8052	9579	8394	6286	7172	6666	7646.12	0.0641698	8.48632
ENSMUSG00000036752	tubulin, beta 4B class IVB [Source:MGI Symbol;Acc:MGI:1915472]	Tubb4b	protein_coding	0.739062	3.17163e-17	16.4987	4.64049e-15	12710	16267	12654	9241	9179	9204	11516.2	0.0875659	8.44006
ENSMUSG00000039041	adhesion regulating molecule 1 [Source:MGI Symbol;Acc:MGI:1929289]	Adrm1	protein_coding	1.47548	3.5889e-17	16.445	5.20454e-15	494	563	432	147	189	161	336.509	0.175118	8.42561
ENSMUSG00000044792	iron-sulfur cluster assembly 1 [Source:MGI Symbol;Acc:MGI:1916296]	Isca1	protein_coding	1.11937	4.86964e-17	16.3125	6.99989e-15	1255	1929	1395	678	782	742	1131.59	0.13342	8.3898
ENSMUSG00000021824	adaptor-related protein complex 3, mu 1 subunit [Source:MGI Symbol;Acc:MGI:1929212]	Ap3m1	protein_coding	1.1091	5.63321e-17	16.2492	8.02708e-15	1989	2217	1925	1000	912	1081	1536.59	0.132467	8.37266
ENSMUSG00000028410	DnaJ heat shock protein family (Hsp40) member A1 [Source:MGI Symbol;Acc:MGI:1270129]	Dnaja1	protein_coding	1.03173	6.36138e-17	16.1964	8.98654e-15	1522	2035	1636	803	1079	842	1321.37	0.123438	8.35833
ENSMUSG00000070834	predicted gene 13015 [Source:MGI Symbol;Acc:MGI:3651767]	Gm13015	processed_pseudogene	1.95082	8.68179e-17	16.0614	1.21597e-14	150	217	188	10	23	12	103.303	0.23443	8.32155
ENSMUSG00000110657	predicted gene 7684 [Source:MGI Symbol;Acc:MGI:3644097]	Gm7684	processed_pseudogene	1.16523	1.18236e-16	15.9273	1.64197e-14	904	1078	804	411	462	416	684.507	0.140646	8.28487
ENSMUSG00000091955	predicted pseudogene 9844 [Source:MGI Symbol;Acc:MGI:3704288]	Gm9844	protein_coding	1.77197	1.26462e-16	15.898	1.74146e-14	508	443	395	73	124	74	278.776	0.214087	8.27686
ENSMUSG00000061315	nascent polypeptide-associated complex alpha polypeptide [Source:MGI Symbol;Acc:MGI:106095]	Naca	protein_coding	1.30254	1.34399e-15	14.8716	1.83533e-13	1058	1092	937	374	515	350	731.437	0.163012	7.99049
ENSMUSG00000040621	gem nuclear organelle associated protein 8 [Source:MGI Symbol;Acc:MGI:2384300]	Gemin8	protein_coding	1.59903	1.44708e-15	14.8395	1.95977e-13	401	568	386	113	150	94	289.643	0.200345	7.98138
ENSMUSG00000083621	predicted gene 14586 [Source:MGI Symbol;Acc:MGI:3705507]	Gm14586	processed_pseudogene	1.79356	1.73176e-15	14.7615	2.3261e-13	183	191	194	32	30	28	113.726	0.225344	7.95918
ENSMUSG00000074280	predicted gene 6166 [Source:MGI Symbol;Acc:MGI:3645893]	Gm6166	processed_pseudogene	1.70379	2.03941e-15	14.6905	2.71706e-13	290	324	254	67	51	63	179.933	0.214612	7.93892
ENSMUSG00000081382	ribosomal protein L18, pseudogene 1 [Source:MGI Symbol;Acc:MGI:98018]	Rpl18-ps1	processed_pseudogene	1.85882	2.534e-15	14.5962	3.34877e-13	173	156	145	5	10	2	86.1468	0.234938	7.91194
ENSMUSG00000059218	predicted gene 13084 [Source:MGI Symbol;Acc:MGI:3650237]	Gm13084	protein_coding	0.685803	3.46027e-15	14.4609	4.53628e-13	26489	35101	25251	19069	21210	19638	24323.2	0.0871074	7.87308
ENSMUSG00000104913	predicted gene 6560 [Source:MGI Symbol;Acc:MGI:3646204]	Gm6560	processed_pseudogene	0.772552	4.38678e-15	14.3579	5.70525e-13	1981	2485	2089	1391	1432	1409	1796.34	0.0984976	7.84335
ENSMUSG00000090036	predicted gene 15900 [Source:MGI Symbol;Acc:MGI:3801848]	Gm15900	processed_pseudogene	1.81399	5.18955e-15	14.2849	6.69616e-13	115	142	103	0	0	2	63.0406	0.231902	7.82223
ENSMUSG00000113202	predicted gene, 48291 [Source:MGI Symbol;Acc:MGI:6097729]	Gm48291	processed_pseudogene	1.82584	8.15084e-15	14.0888	1.0435e-12	143	144	116	11	11	13	76.1387	0.235131	7.76521
ENSMUSG00000084104	predicted gene 13578 [Source:MGI Symbol;Acc:MGI:3649303]	Gm13578	processed_pseudogene	1.82272	9.02148e-15	14.0447	1.14601e-12	173	165	143	2	9	10	87.7944	0.235119	7.75234
ENSMUSG00000095762	predicted gene 16378 [Source:MGI Symbol;Acc:MGI:3646886]	Gm16378	processed_pseudogene	1.81049	1.25338e-14	13.9019	1.57993e-12	138	215	170	10	2	8	93.8057	0.234808	7.71049
ENSMUSG00000081254	predicted gene 12112 [Source:MGI Symbol;Acc:MGI:3650115]	Gm12112	processed_pseudogene	1.81256	1.4667e-14	13.8337	1.83472e-12	119	171	188	9	18	9	88.8687	0.235692	7.69041
ENSMUSG00000097715	G protein-coupled receptor 137B, pseudogene [Source:MGI Symbol;Acc:MGI:3710533]	Gpr137b-ps	transcribed_unprocessed_pseudogene	1.25741	1.67394e-14	13.7763	2.0781e-12	737	1245	924	392	431	360	684.178	0.163865	7.67348
ENSMUSG00000053173	ribosomal protein L18, pseudogene 2 [Source:MGI Symbol;Acc:MGI:3646997]	Rpl18-ps2	processed_pseudogene	1.79644	2.24769e-14	13.6483	2.76939e-12	159	150	128	16	13	10	82.9407	0.235271	7.6356
ENSMUSG00000090098	ALMS1, centrosome and basal body associated, pseudogene 2 [Source:MGI Symbol;Acc:MGI:3779593]	Alms1-ps2	transcribed_unprocessed_pseudogene	1.63117	2.74992e-14	13.5607	3.36291e-12	237	266	205	55	56	49	148.482	0.214357	7.60958
ENSMUSG00000056201	cofilin 1, non-muscle [Source:MGI Symbol;Acc:MGI:101757]	Cfl1	protein_coding	1.21016	3.56928e-14	13.4474	4.33257e-12	4521	5857	4613	1738	3017	1766	3603.74	0.15974	7.5758
ENSMUSG00000030246	lactate dehydrogenase B [Source:MGI Symbol;Acc:MGI:96763]	Ldhb	protein_coding	0.575804	3.60171e-14	13.4435	4.33979e-12	33500	43469	32854	25954	28876	27572	31804.7	0.0760175	7.57462
ENSMUSG00000094568	SWI/SNF related, matrix associated, actin dependent regulator of chromatin, subfamily e, member 1, pseodogene 1 [Source:MGI Symbol;Acc:MGI:3037673]	Smarce1-ps1	processed_pseudogene	1.543	4.38199e-14	13.3583	5.24143e-12	320	362	299	91	76	97	212.538	0.204394	7.54912
ENSMUSG00000027533	fatty acid binding protein 5, epidermal [Source:MGI Symbol;Acc:MGI:101790]	Fabp5	protein_coding	1.26347	6.68788e-14	13.1747	7.94162e-12	1006	1198	899	472	371	402	734.644	0.1686	7.49386
ENSMUSG00000033813	transcription elongation factor A (SII) 1 [Source:MGI Symbol;Acc:MGI:1196624]	Tcea1	protein_coding	1.16951	8.03466e-14	13.095	9.47223e-12	697	978	851	338	457	339	613.298	0.156566	7.46975
ENSMUSG00000083678	predicted gene 12989 [Source:MGI Symbol;Acc:MGI:3652245]	Gm12989	processed_pseudogene	1.34803	8.57117e-14	13.067	1.00326e-11	380	532	400	149	184	142	300.802	0.180671	7.46124
ENSMUSG00000074369	oocyte specific homeobox 2 [Source:MGI Symbol;Acc:MGI:2149033]	Obox2	protein_coding	1.00029	1.14208e-13	12.9423	1.32732e-11	21596	25661	18286	13071	10868	10509	16769.5	0.134749	7.42333
ENSMUSG00000019505	ubiquitin B [Source:MGI Symbol;Acc:MGI:98888]	Ubb	protein_coding	0.820796	1.23813e-13	12.9072	1.42882e-11	9619	11327	8880	6465	5805	6132	8055.71	0.110729	7.41264
ENSMUSG00000044609	predicted pseudogene 9294 [Source:MGI Symbol;Acc:MGI:3648888]	Gm9294	processed_pseudogene	1.71559	1.63268e-13	12.7871	1.87096e-11	119	102	90	2	2	3	55.9808	0.232595	7.37588
ENSMUSG00000048574	cyclin B1, pseudogene [Source:MGI Symbol;Acc:MGI:3648694]	Ccnb1-ps	processed_pseudogene	0.865001	1.93863e-13	12.7125	2.20614e-11	1471	1828	1452	921	925	979	1264.55	0.11764	7.35296
ENSMUSG00000028832	stathmin 1 [Source:MGI Symbol;Acc:MGI:96739]	Stmn1	protein_coding	1.71194	2.16208e-13	12.6651	2.44345e-11	154	234	180	15	35	24	109.676	0.233286	7.33837
ENSMUSG00000117051	TEC	AC166360.1	TEC	1.67441	2.83085e-13	12.5481	3.17734e-11	137	200	152	25	25	29	97.0409	0.229302	7.30221
ENSMUSG00000082925	predicted gene 13135 [Source:MGI Symbol;Acc:MGI:3650404]	Gm13135	processed_pseudogene	1.68633	7.73516e-13	12.1115	8.62286e-11	98	128	160	10	6	9	71.5271	0.235332	7.16577
ENSMUSG00000021306	G protein-coupled receptor 137B [Source:MGI Symbol;Acc:MGI:1891463]	Gpr137b	protein_coding	1.49637	9.07987e-13	12.0419	1.00535e-10	586	836	401	143	162	185	390.212	0.209465	7.14378
ENSMUSG00000070572	tRNA methyltransferase 11-2, pseudogene 2 [Source:MGI Symbol;Acc:MGI:3651720]	Trmt112-ps2	processed_pseudogene	1.65344	9.30542e-13	12.0313	1.02341e-10	182	284	276	23	54	39	146.569	0.231562	7.14041
ENSMUSG00000079508	apolipoprotein O [Source:MGI Symbol;Acc:MGI:1915566]	Apoo	protein_coding	1.66048	1.19811e-12	11.9215	1.30889e-10	159	182	125	20	27	16	90.9875	0.233686	7.10559
ENSMUSG00000103034	predicted pseudogene 8797 [Source:MGI Symbol;Acc:MGI:3643769]	Gm8797	protein_coding	1.66469	1.24558e-12	11.9046	1.35174e-10	206	256	158	36	21	20	119.853	0.234456	7.10022
ENSMUSG00000112909	predicted gene 10120 [Source:MGI Symbol;Acc:MGI:3641745]	Gm10120	processed_pseudogene	1.62734	1.59369e-12	11.7976	1.71814e-10	90	113	76	1	2	1	49.1568	0.230304	7.06608
ENSMUSG00000025508	ribosomal protein, large P2 [Source:MGI Symbol;Acc:MGI:1914436]	Rplp2	protein_coding	1.54455	1.86868e-12	11.7285	2.00144e-10	340	333	254	73	91	54	196.204	0.219273	7.04395
ENSMUSG00000058600	ribosomal protein L30 [Source:MGI Symbol;Acc:MGI:98037]	Rpl30	protein_coding	1.64002	2.55591e-12	11.5925	2.71972e-10	115	96	93	6	5	5	56.2232	0.234281	7.0002
ENSMUSG00000106683	predicted gene 43263 [Source:MGI Symbol;Acc:MGI:5663400]	Gm43263	lincRNA	1.63344	3.44856e-12	11.4624	3.64591e-10	110	217	164	18	27	17	93.9929	0.234753	6.95811
ENSMUSG00000057506	biogenesis of lysosomal organelles complex-1, subunit 2 [Source:MGI Symbol;Acc:MGI:1920939]	Bloc1s2	protein_coding	1.63438	4.12689e-12	11.3844	4.30748e-10	142	202	103	18	13	12	83.9213	0.235748	6.93277
ENSMUSG00000095597	predicted pseudogene 6472 [Source:MGI Symbol;Acc:MGI:3648396]	Gm6472	transcribed_processed_pseudogene	1.50494	4.1085e-12	11.3863	4.30748e-10	335	386	238	90	78	70	204.027	0.217056	6.9334
ENSMUSG00000072872	RING1 and YY1 binding protein [Source:MGI Symbol;Acc:MGI:1929059]	Rybp	protein_coding	1.22825	4.80947e-12	11.3179	4.98815e-10	539	589	454	182	257	207	375.782	0.177721	6.91109
ENSMUSG00000074656	eukaryotic translation initiation factor 2, subunit 2 (beta) [Source:MGI Symbol;Acc:MGI:1914454]	Eif2s2	protein_coding	1.06528	5.82861e-12	11.2344	6.00713e-10	2619	2484	2315	1130	1544	1001	1868.69	0.154752	6.88378
ENSMUSG00000082706	predicted gene 11663 [Source:MGI Symbol;Acc:MGI:3651529]	Gm11663	processed_pseudogene	1.52026	6.39716e-12	11.194	6.55189e-10	180	223	163	43	48	40	118.785	0.221273	6.87051
ENSMUSG00000015341	golgi autoantigen, golgin subfamily a, 7 [Source:MGI Symbol;Acc:MGI:1931029]	Golga7	protein_coding	0.941026	6.46061e-12	11.1897	6.57578e-10	2491	2575	2098	1302	1540	1141	1868.56	0.136994	6.8691
ENSMUSG00000058057	methyltransferase like 7A3 [Source:MGI Symbol;Acc:MGI:3710670]	Mettl7a3	protein_coding	1.257	9.27502e-12	11.0327	9.38208e-10	520	484	449	181	183	202	343.306	0.184384	6.81733
ENSMUSG00000068798	RAS-related protein 1a [Source:MGI Symbol;Acc:MGI:97852]	Rap1a	protein_coding	1.22009	1.50668e-11	10.822	1.51472e-09	511	516	490	215	228	174	361.703	0.180828	6.74726
ENSMUSG00000062093	predicted gene 10110 [Source:MGI Symbol;Acc:MGI:3641718]	Gm10110	transcribed_processed_pseudogene	0.777468	1.56584e-11	10.8053	1.5646e-09	1152	1460	1221	716	906	826	1044.37	0.115323	6.74166
ENSMUSG00000082394	predicted gene 4596 [Source:MGI Symbol;Acc:MGI:3782779]	Gm4596	processed_pseudogene	0.926476	1.62809e-11	10.7883	1.61694e-09	765	959	815	473	462	478	661.231	0.137541	6.736
ENSMUSG00000084319	tumor protein, translationally-controlled, pseudogene 3 [Source:MGI Symbol;Acc:MGI:2664997]	Tpt1-ps3	processed_pseudogene	1.28357	1.80528e-11	10.7435	1.78211e-09	297	393	299	112	120	131	228.031	0.19098	6.72096
ENSMUSG00000075600	zinc finger CCCH type containing 3 [Source:MGI Symbol;Acc:MGI:2663721]	Zc3h3	protein_coding	1.51843	2.19645e-11	10.6583	2.15528e-09	155	162	153	32	35	32	97.7779	0.226892	6.69233
ENSMUSG00000082536	predicted gene 13456 [Source:MGI Symbol;Acc:MGI:3651389]	Gm13456	processed_pseudogene	1.28702	3.14788e-11	10.502	3.07049e-09	468	440	390	157	145	171	301.634	0.193843	6.63948
ENSMUSG00000109793	predicted pseudogene 10043 [Source:MGI Symbol;Acc:MGI:3641648]	Gm10043	processed_pseudogene	1.51526	3.34581e-11	10.4755	3.24425e-09	88	113	105	2	4	0	54.3233	0.228529	6.63049
ENSMUSG00000084230	predicted gene 14388 [Source:MGI Symbol;Acc:MGI:3650926]	Gm14388	processed_pseudogene	1.52701	4.07606e-11	10.3898	3.92908e-09	137	191	125	26	26	30	91.2105	0.23132	6.60129
ENSMUSG00000011257	poly(A) binding protein, cytoplasmic 4 [Source:MGI Symbol;Acc:MGI:2385206]	Pabpc4	protein_coding	0.80636	4.13546e-11	10.3835	3.96302e-09	1437	1793	1373	849	977	1028	1241.56	0.122192	6.59914
ENSMUSG00000085342	predicted gene 12254 [Source:MGI Symbol;Acc:MGI:3650324]	Gm12254	processed_pseudogene	1.5239	4.86283e-11	10.3131	4.63298e-09	98	77	97	3	5	4	50.0948	0.231769	6.57508
ENSMUSG00000038141	transmembrane protein 181A [Source:MGI Symbol;Acc:MGI:1924356]	Tmem181a	protein_coding	1.13725	4.89544e-11	10.3102	4.63708e-09	398	549	453	174	224	222	338.75	0.17299	6.57408
ENSMUSG00000026341	ARP3 actin-related protein 3 [Source:MGI Symbol;Acc:MGI:1921367]	Actr3	protein_coding	0.973677	5.01394e-11	10.2998	4.72203e-09	1327	1973	2005	880	989	940	1356.26	0.148189	6.57052
ENSMUSG00000112640	predicted gene, 32687 [Source:MGI Symbol;Acc:MGI:5591846]	Gm32687	protein_coding	1.54524	5.06644e-11	10.2953	4.74422e-09	84	103	95	8	7	9	53.0025	0.235233	6.56897
ENSMUSG00000021963	Sin3-associated polypeptide 18 [Source:MGI Symbol;Acc:MGI:1277978]	Sap18	protein_coding	1.42061	5.70669e-11	10.2436	5.30458e-09	340	261	290	86	82	78	196.059	0.216847	6.55123
ENSMUSG00000040158	Tax1 (human T cell leukemia virus type I) binding protein 3 [Source:MGI Symbol;Acc:MGI:1923531]	Tax1bp3	protein_coding	1.34443	5.72961e-11	10.2419	5.30458e-09	224	276	222	79	80	74	161.908	0.205237	6.55063
ENSMUSG00000021273	farnesyl diphosphate farnesyl transferase 1 [Source:MGI Symbol;Acc:MGI:102706]	Fdft1	protein_coding	0.541412	6.17122e-11	10.2096	5.68133e-09	8240	11537	9031	6881	7808	7390	8404.11	0.0827906	6.53953
ENSMUSG00000099764	ribosomal protein S10, pseudogene 2 [Source:MGI Symbol;Acc:MGI:3645627]	Rps10-ps2	processed_pseudogene	1.52155	6.93227e-11	10.1591	6.34631e-09	119	108	87	6	4	9	58.2485	0.23329	6.52212
ENSMUSG00000113456	predicted gene, 30738 [Source:MGI Symbol;Acc:MGI:5589897]	Gm30738	processed_pseudogene	1.52525	8.03713e-11	10.0949	7.31691e-09	90	118	102	10	5	9	57.7948	0.234658	6.4999
ENSMUSG00000084106	predicted pseudogene 6136 [Source:MGI Symbol;Acc:MGI:3646897]	Gm6136	processed_pseudogene	1.52267	1.04767e-10	9.97977	9.48519e-09	99	116	97	8	12	14	59.747	0.23571	6.45991
ENSMUSG00000100615	predicted gene 5511 [Source:MGI Symbol;Acc:MGI:3779492]	Gm5511	processed_pseudogene	1.5195	1.06535e-10	9.97251	9.59226e-09	121	117	120	15	15	20	70.7742	0.235312	6.45737
ENSMUSG00000079427	5, 10-methenyltetrahydrofolate synthetase-like [Source:MGI Symbol;Acc:MGI:3780550]	Mthfsl	protein_coding	1.52071	1.10053e-10	9.9584	9.85481e-09	157	121	99	14	12	15	73.0886	0.23568	6.45246
ENSMUSG00000040681	high mobility group nucleosomal binding domain 1 [Source:MGI Symbol;Acc:MGI:96120]	Hmgn1	protein_coding	0.721313	1.42818e-10	9.84522	1.27193e-08	3882	5342	3989	2703	3459	2628	3644.22	0.112479	6.41286
ENSMUSG00000022858	transformer 2 beta [Source:MGI Symbol;Acc:MGI:106016]	Tra2b	protein_coding	1.21608	1.45116e-10	9.83829	1.28541e-08	854	699	928	342	306	338	592.473	0.189703	6.41042
ENSMUSG00000062248	CDC28 protein kinase regulatory subunit 2 [Source:MGI Symbol;Acc:MGI:1913447]	Cks2	protein_coding	1.04296	1.67142e-10	9.77691	1.47256e-08	1289	1381	1052	682	593	543	933.096	0.163247	6.38885
ENSMUSG00000079108	signal recognition particle 54C [Source:MGI Symbol;Acc:MGI:3714359]	Srp54c	protein_coding	1.11952	1.76855e-10	9.75238	1.5498e-08	442	693	555	246	239	263	408.408	0.175468	6.3802
ENSMUSG00000057841	ribosomal protein L32 [Source:MGI Symbol;Acc:MGI:98038]	Rpl32	protein_coding	1.27268	1.91692e-10	9.7174	1.67088e-08	823	706	642	314	240	224	504.09	0.19986	6.36785
ENSMUSG00000021546	heterogeneous nuclear ribonucleoprotein K [Source:MGI Symbol;Acc:MGI:99894]	Hnrnpk	protein_coding	0.575124	2.20321e-10	9.65694	1.91027e-08	3731	4309	3697	2592	3330	2914	3409.08	0.0906211	6.34646
ENSMUSG00000062997	ribosomal protein L35 [Source:MGI Symbol;Acc:MGI:1913739]	Rpl35	protein_coding	1.48623	2.27504e-10	9.64301	1.96217e-08	124	111	81	10	10	6	59.6358	0.234365	6.34152
ENSMUSG00000079317	trafficking protein particle complex 2 [Source:MGI Symbol;Acc:MGI:1913476]	Trappc2	protein_coding	0.995593	2.36104e-10	9.6269	2.02567e-08	536	679	499	271	315	294	433.838	0.157138	6.33581
ENSMUSG00000038489	polymerase (RNA) II (DNA directed) polypeptide L [Source:MGI Symbol;Acc:MGI:1913741]	Polr2l	protein_coding	1.27431	2.73631e-10	9.56284	2.33541e-08	262	323	324	104	98	118	208.475	0.201854	6.31303
ENSMUSG00000001674	DEAD (Asp-Glu-Ala-Asp) box polypeptide 18 [Source:MGI Symbol;Acc:MGI:1914192]	Ddx18	protein_coding	1.17027	2.77134e-10	9.55731	2.35305e-08	682	867	854	275	456	278	573.716	0.185431	6.31106
ENSMUSG00000033596	ring finger and WD repeat domain 3 [Source:MGI Symbol;Acc:MGI:2384584]	Rfwd3	protein_coding	0.87281	2.83872e-10	9.54688	2.39784e-08	853	972	818	438	568	537	699.223	0.13838	6.30734
ENSMUSG00000073131	VMA21 vacuolar H+-ATPase homolog (S. cerevisiae) [Source:MGI Symbol;Acc:MGI:1914298]	Vma21	protein_coding	1.21116	3.1434e-10	9.5026	2.64158e-08	389	490	402	165	141	191	300.385	0.192507	6.29154
ENSMUSG00000036438	calmodulin 2 [Source:MGI Symbol;Acc:MGI:103250]	Calm2	protein_coding	0.776896	3.32017e-10	9.47884	2.7759e-08	3943	4819	3587	2798	2683	2313	3356.71	0.12365	6.28304
ENSMUSG00000081051	predicted pseudogene 15427 [Source:MGI Symbol;Acc:MGI:3642341]	Gm15427	processed_pseudogene	1.08345	3.43539e-10	9.46402	2.85765e-08	1411	1305	1163	667	524	611	962.79	0.172585	6.27774
ENSMUSG00000006998	proteasome (prosome, macropain) 26S subunit, non-ATPase, 2 [Source:MGI Symbol;Acc:MGI:1096584]	Psmd2	protein_coding	0.659721	3.60045e-10	9.44364	2.97983e-08	3130	3240	2859	2018	2390	2094	2619.47	0.105211	6.27043
ENSMUSG00000114003	predicted gene 9616 [Source:MGI Symbol;Acc:MGI:3780024]	Gm9616	processed_pseudogene	1.33693	3.79469e-10	9.42082	3.1248e-08	445	450	288	93	143	130	263.182	0.21349	6.26225
ENSMUSG00000057113	nucleophosmin 1 [Source:MGI Symbol;Acc:MGI:106184]	Npm1	protein_coding	0.868772	3.83454e-10	9.41629	3.14183e-08	2009	1948	1729	1127	1223	986	1513.72	0.138768	6.26062
ENSMUSG00000068523	guanine nucleotide binding protein (G protein), gamma 5 [Source:MGI Symbol;Acc:MGI:109164]	Gng5	protein_coding	1.36644	5.65233e-10	9.24777	4.60819e-08	183	237	179	48	52	65	129.714	0.2204	6.19983
ENSMUSG00000054310	oocyte specific homeobox 1 [Source:MGI Symbol;Acc:MGI:1918718]	Obox1	protein_coding	0.808649	7.05293e-10	9.15163	5.7216e-08	11968	13926	10869	8559	6998	6907	9904.51	0.13117	6.1649
ENSMUSG00000086240	predicted gene 7846 [Source:MGI Symbol;Acc:MGI:3645212]	Gm7846	processed_pseudogene	1.44962	7.80244e-10	9.10777	6.29845e-08	173	179	163	33	13	22	101.125	0.235753	6.1489
ENSMUSG00000025980	heat shock protein 1 (chaperonin) [Source:MGI Symbol;Acc:MGI:96242]	Hspd1	protein_coding	1.13541	1.1369e-09	8.94428	9.13256e-08	607	888	966	293	438	325	590.637	0.186472	6.0889
ENSMUSG00000032803	carnitine deficiency-associated gene expressed in ventricle 3 [Source:MGI Symbol;Acc:MGI:2448759]	Cdv3	protein_coding	1.07166	1.55985e-09	8.80692	1.24689e-07	1349	1345	1486	572	879	516	1036.35	0.177485	6.03805
ENSMUSG00000009927	ribosomal protein S25 [Source:MGI Symbol;Acc:MGI:1922867]	Rps25	protein_coding	1.39935	1.58687e-09	8.79946	1.26233e-07	168	150	157	27	45	30	99.4148	0.231862	6.03528
ENSMUSG00000045427	heterogeneous nuclear ribonucleoprotein H2 [Source:MGI Symbol;Acc:MGI:1201779]	Hnrnph2	protein_coding	1.17858	1.66278e-09	8.77916	1.31633e-07	334	468	344	130	143	179	268.643	0.195526	6.02773
ENSMUSG00000036305	ribosomal protein L39, pseudogene [Source:MGI Symbol;Acc:MGI:3705781]	Rpl39-ps	processed_pseudogene	1.41717	1.73529e-09	8.76063	1.36058e-07	131	130	103	12	10	21	70.5749	0.235377	6.02083
ENSMUSG00000058407	thioredoxin domain containing 9 [Source:MGI Symbol;Acc:MGI:2138153]	Txndc9	protein_coding	0.654649	1.72701e-09	8.7627	1.36058e-07	5539	6783	5234	4321	4209	3734	4955.35	0.108717	6.0216
ENSMUSG00000079884	predicted gene 10698 [Source:MGI Symbol;Acc:MGI:3704329]	Gm10698	processed_pseudogene	0.924125	1.81656e-09	8.74075	1.41753e-07	515	696	559	280	357	331	456.604	0.153677	6.01341
ENSMUSG00000022841	adaptor-related protein complex 2, mu 1 subunit [Source:MGI Symbol;Acc:MGI:1298405]	Ap2m1	protein_coding	1.149	2.29672e-09	8.63889	1.78371e-07	283	389	358	120	148	157	244.793	0.192292	5.9753
ENSMUSG00000039105	ATPase, H+ transporting, lysosomal V1 subunit G1 [Source:MGI Symbol;Acc:MGI:1913540]	Atp6v1g1	protein_coding	0.857825	2.30773e-09	8.63682	1.78381e-07	1210	1671	1115	792	781	742	1050.62	0.143581	5.97452
ENSMUSG00000016319	solute carrier family 25 (mitochondrial carrier, adenine nucleotide translocator), member 5 [Source:MGI Symbol;Acc:MGI:1353496]	Slc25a5	protein_coding	0.724475	2.33729e-09	8.63129	1.79818e-07	1278	1612	1216	859	1010	841	1131.93	0.121303	5.97244
ENSMUSG00000061724	predicted gene 2423 [Source:MGI Symbol;Acc:MGI:3805957]	Gm2423	processed_pseudogene	1.32135	2.35919e-09	8.62724	1.80654e-07	62	90	77	0	1	0	39.9483	0.221297	5.97092
ENSMUSG00000093798	predicted pseudogene 8355 [Source:MGI Symbol;Acc:MGI:3645191]	Gm8355	processed_pseudogene	1.39256	2.86478e-09	8.54291	2.16551e-07	102	118	109	18	23	20	66.9566	0.234471	5.93916
ENSMUSG00000021807	RNA transcription, translation and transport factor [Source:MGI Symbol;Acc:MGI:1915295]	Rtraf	protein_coding	1.05705	2.85816e-09	8.54391	2.16551e-07	977	1026	949	521	376	479	732.053	0.177968	5.93954
ENSMUSG00000070677	DNA segment, Chr 5, ERATO Doi 577, expressed [Source:MGI Symbol;Acc:MGI:1261918]	D5Ertd577e	protein_coding	0.680532	2.86761e-09	8.54248	2.16551e-07	1195	1544	1435	885	1041	938	1168.93	0.114587	5.939
ENSMUSG00000096173	predicted gene 3150 [Source:MGI Symbol;Acc:MGI:3781329]	Gm3150	processed_pseudogene	1.32209	2.9142e-09	8.53548	2.19059e-07	70	74	82	0	2	1	40.1824	0.22271	5.93636
ENSMUSG00000074412	predicted gene 10689 [Source:MGI Symbol;Acc:MGI:3642613]	Gm10689	processed_pseudogene	1.38276	2.95152e-09	8.52995	2.20852e-07	150	135	124	23	34	28	85.1199	0.233013	5.93427
ENSMUSG00000059343	aldolase 1 A, retrogene 1 [Source:MGI Symbol;Acc:MGI:2447811]	Aldoart1	protein_coding	1.38439	3.64826e-09	8.43791	2.71746e-07	120	217	142	19	33	36	95.891	0.234667	5.8994
ENSMUSG00000067702	tubulin, alpha 3A [Source:MGI Symbol;Acc:MGI:1095406]	Tuba3a	protein_coding	0.476202	4.05975e-09	8.3915	3.01028e-07	5951	7903	6729	5381	5951	5242	6137.6	0.0809628	5.88174
ENSMUSG00000063543	predicted gene 5616 [Source:MGI Symbol;Acc:MGI:3646416]	Gm5616	processed_pseudogene	1.34529	4.25294e-09	8.37131	3.1255e-07	60	75	76	4	4	3	38.5992	0.229023	5.87404
ENSMUSG00000099631	predicted gene 8641 [Source:MGI Symbol;Acc:MGI:3647459]	Gm8641	processed_pseudogene	1.34387	4.25329e-09	8.37128	3.1255e-07	158	197	148	49	37	37	106.757	0.228781	5.87403
ENSMUSG00000034681	ribonucleic acid binding protein S1 [Source:MGI Symbol;Acc:MGI:97960]	Rnps1	protein_coding	0.778264	5.29885e-09	8.27582	3.87644e-07	732	932	780	512	532	487	662.241	0.133321	5.8375
ENSMUSG00000095677	dynein light chain Tctex-type 1F [Source:MGI Symbol;Acc:MGI:3780996]	Dynlt1f	protein_coding	1.30732	5.63627e-09	8.24901	4.10496e-07	97	93	90	4	4	0	50.5317	0.224348	5.82721
ENSMUSG00000058186	zinc finger protein 980 [Source:MGI Symbol;Acc:MGI:3712454]	Zfp980	protein_coding	1.27716	6.43691e-09	8.19132	4.66733e-07	310	281	273	84	71	110	193.439	0.22001	5.80499
ENSMUSG00000062647	ribosomal protein L7A [Source:MGI Symbol;Acc:MGI:1353472]	Rpl7a	protein_coding	1.34599	6.96772e-09	8.15691	5.00981e-07	112	135	116	27	29	24	75.7424	0.232399	5.7917
ENSMUSG00000027835	programmed cell death 10 [Source:MGI Symbol;Acc:MGI:1928396]	Pdcd10	protein_coding	1.32594	6.97039e-09	8.15674	5.00981e-07	117	101	58	6	4	6	51.0579	0.228941	5.79164
ENSMUSG00000069011	predicted gene 10254 [Source:MGI Symbol;Acc:MGI:3708673]	Gm10254	processed_pseudogene	1.27132	7.0895e-09	8.14938	5.07318e-07	213	246	298	88	79	67	169.141	0.219617	5.78879
ENSMUSG00000025464	polyamine oxidase (exo-N4-amino) [Source:MGI Symbol;Acc:MGI:1916983]	Paox	protein_coding	1.14513	8.24138e-09	8.084	5.87181e-07	237	313	303	99	132	114	201.788	0.198688	5.76345
ENSMUSG00000052912	SWI/SNF related, matrix associated, actin depenent ragulator of chromatin, subfamily a, member 5, pseudogene [Source:MGI Symbol;Acc:MGI:2443330]	Smarca5-ps	transcribed_processed_pseudogene	1.35166	9.83744e-09	8.00712	6.97862e-07	104	133	193	24	27	16	85.8277	0.235748	5.73351
ENSMUSG00000101188	eukaryotic translation initiation factor 4A, pseudogene 4 [Source:MGI Symbol;Acc:MGI:1195958]	Eif4a-ps4	processed_pseudogene	0.661436	1.05473e-08	7.97686	7.44995e-07	2097	2992	2143	1536	1879	1590	2023.42	0.115602	5.72168
ENSMUSG00000060419	ribosomal protein S16, pseudogene 2 [Source:MGI Symbol;Acc:MGI:3704259]	Rps16-ps2	processed_pseudogene	1.22713	1.21662e-08	7.91485	8.55654e-07	291	239	263	93	98	79	181.997	0.215384	5.69738
ENSMUSG00000059355	WD repeat domain 83 opposite strand [Source:MGI Symbol;Acc:MGI:3041257]	Wdr83os	protein_coding	1.32514	1.39913e-08	7.85414	9.79809e-07	188	134	165	37	41	29	103.093	0.233567	5.6735
ENSMUSG00000035202	leucyl-tRNA synthetase, mitochondrial [Source:MGI Symbol;Acc:MGI:2142973]	Lars2	protein_coding	0.669289	1.42873e-08	7.84505	9.96284e-07	1823	1834	1747	1140	1346	1270	1527.61	0.118042	5.66991
ENSMUSG00000115730	predicted gene 7459 [Source:MGI Symbol;Acc:MGI:3645341]	Gm7459	processed_pseudogene	1.19238	1.50188e-08	7.82336	1.04285e-06	294	359	215	101	108	103	199.069	0.210617	5.66135
ENSMUSG00000096557	predicted gene 7258 [Source:MGI Symbol;Acc:MGI:3644893]	Gm7258	processed_pseudogene	1.32379	1.54792e-08	7.81025	1.06579e-06	111	100	79	13	13	7	56.1574	0.234043	5.65617
ENSMUSG00000022400	ring-box 1 [Source:MGI Symbol;Acc:MGI:1891829]	Rbx1	protein_coding	0.603719	1.54663e-08	7.81061	1.06579e-06	1449	1832	1531	1146	1175	1176	1378.7	0.106734	5.65631
ENSMUSG00000102832	predicted gene 5190 [Source:MGI Symbol;Acc:MGI:3647068]	Gm5190	processed_pseudogene	0.769789	1.6968e-08	7.77037	1.16341e-06	769	1075	800	505	590	564	714.358	0.136478	5.64037
ENSMUSG00000081406	ribosomal protein S6, pseudogene 4 [Source:MGI Symbol;Acc:MGI:3650907]	Rps6-ps4	processed_pseudogene	1.26691	1.72611e-08	7.76293	1.17857e-06	133	132	103	10	4	1	66.9736	0.224732	5.63743
ENSMUSG00000060743	H3 histone, family 3A [Source:MGI Symbol;Acc:MGI:1097686]	H3f3a	protein_coding	0.873075	1.78311e-08	7.74882	1.21244e-06	784	969	667	460	478	433	632.792	0.155025	5.63183
ENSMUSG00000041841	ribosomal protein L37 [Source:MGI Symbol;Acc:MGI:1914531]	Rpl37	protein_coding	1.16461	1.97902e-08	7.70355	1.34009e-06	246	247	250	86	113	85	174.247	0.207454	5.61383
ENSMUSG00000027944	HCLS1 associated X-1 [Source:MGI Symbol;Acc:MGI:1346319]	Hax1	protein_coding	0.947061	2.00472e-08	7.69795	1.3519e-06	423	533	484	253	281	220	367.477	0.168769	5.61159
ENSMUSG00000089936	predicted gene 16199 [Source:MGI Symbol;Acc:MGI:3801797]	Gm16199	processed_pseudogene	1.26207	2.0474e-08	7.6888	1.37503e-06	54	77	66	2	4	2	35.4726	0.22505	5.60795
ENSMUSG00000094320	coiled-coil-helix-coiled-coil-helix domain containing 2, pseudogene [Source:MGI Symbol;Acc:MGI:3649942]	Chchd2-ps	processed_pseudogene	1.27676	2.09948e-08	7.67789	1.40425e-06	193	222	158	63	49	43	124.094	0.227847	5.6036
ENSMUSG00000083716	predicted gene 13436 [Source:MGI Symbol;Acc:MGI:3651005]	Gm13436	processed_pseudogene	1.2632	2.32517e-08	7.63355	1.54888e-06	65	74	69	5	3	2	37.9942	0.226141	5.58588
ENSMUSG00000021713	peptidylprolyl isomerase domain and WD repeat containing 1 [Source:MGI Symbol;Acc:MGI:2443069]	Ppwd1	protein_coding	0.705482	2.6233e-08	7.58115	1.74041e-06	886	1020	904	624	659	594	781.019	0.126774	5.56488
ENSMUSG00000069682	predicted pseudogene 10275 [Source:MGI Symbol;Acc:MGI:3704354]	Gm10275	transcribed_processed_pseudogene	1.29969	2.63794e-08	7.57873	1.74306e-06	77	75	105	9	9	11	49.8731	0.233592	5.56391
ENSMUSG00000068856	splicing factor 3b, subunit 4 [Source:MGI Symbol;Acc:MGI:109580]	Sf3b4	protein_coding	1.10393	2.78045e-08	7.55588	1.82985e-06	357	369	298	117	177	139	245.798	0.198738	5.55473
ENSMUSG00000004151	ets variant 1 [Source:MGI Symbol;Acc:MGI:99254]	Etv1	protein_coding	1.0135	3.43532e-08	7.46403	2.25178e-06	376	629	467	210	272	217	361.595	0.183682	5.51767
ENSMUSG00000101330	predicted gene 10193 [Source:MGI Symbol;Acc:MGI:3708520]	Gm10193	processed_pseudogene	1.29956	3.45363e-08	7.46172	2.25476e-06	82	88	102	14	16	12	54.2921	0.235567	5.51673
ENSMUSG00000078193	predicted gene 2000 [Source:MGI Symbol;Acc:MGI:3780170]	Gm2000	protein_coding	1.2628	3.58311e-08	7.44574	2.33002e-06	110	142	99	14	3	9	65.1779	0.229172	5.51026
ENSMUSG00000031422	mortality factor 4 like 2 [Source:MGI Symbol;Acc:MGI:1927167]	Morf4l2	protein_coding	0.698583	4.25902e-08	7.37069	2.7586e-06	1653	2567	1901	1201	1457	1418	1686.35	0.127484	5.47976
ENSMUSG00000059447	hydroxyacyl-Coenzyme A dehydrogenase/3-ketoacyl-Coenzyme A thiolase/enoyl-Coenzyme A hydratase (trifunctional protein), beta subunit [Source:MGI Symbol;Acc:MGI:2136381]	Hadhb	protein_coding	1.29068	4.37177e-08	7.35934	2.82048e-06	78	106	96	13	20	14	55.9714	0.235735	5.47514
ENSMUSG00000112656	predicted gene, 47929 [Source:MGI Symbol;Acc:MGI:6097190]	Gm47929	unprocessed_pseudogene	1.26921	4.50112e-08	7.34668	2.89254e-06	74	79	69	9	6	7	42.3537	0.232032	5.46997
ENSMUSG00000028081	ribosomal protein S3A1 [Source:MGI Symbol;Acc:MGI:1202063]	Rps3a1	protein_coding	1.28884	4.5196e-08	7.3449	2.89307e-06	148	178	142	42	25	19	95.1334	0.235653	5.46924
ENSMUSG00000075053	voltage-dependent anion channel 3, pseudogene 1 [Source:MGI Symbol;Acc:MGI:1270159]	Vdac3-ps1	unprocessed_pseudogene	0.726392	4.79569e-08	7.31915	3.05786e-06	2124	3037	2310	1717	1493	1618	2044.43	0.13307	5.45872
ENSMUSG00000067344	ribosomal protein S25, pseudogene 1 [Source:MGI Symbol;Acc:MGI:3642902]	Rps25-ps1	processed_pseudogene	1.26341	4.95874e-08	7.30463	3.14957e-06	246	227	154	52	42	64	134.705	0.2317	5.45278
ENSMUSG00000075232	S-adenosylmethionine decarboxylase 1 [Source:MGI Symbol;Acc:MGI:88004]	Amd1	protein_coding	0.99731	5.15373e-08	7.28788	3.26078e-06	289	373	346	149	168	172	251.229	0.18313	5.44592
ENSMUSG00000040824	small nuclear ribonucleoprotein D2 [Source:MGI Symbol;Acc:MGI:98345]	Snrpd2	protein_coding	1.14054	6.08894e-08	7.21546	3.83767e-06	344	418	273	149	112	128	240.642	0.21058	5.41617
ENSMUSG00000067430	zinc finger protein 763 [Source:MGI Symbol;Acc:MGI:1920701]	Zfp763	protein_coding	-1.16707	6.16618e-08	7.20998	3.87146e-06	0	0	0	67	86	97	38.4055	0.215569	-5.41391
ENSMUSG00000058147	X-linked lymphocyte-regulated 3C [Source:MGI Symbol;Acc:MGI:3047103]	Xlr3c	protein_coding	1.27363	6.42783e-08	7.19194	4.00505e-06	128	115	103	27	20	20	71.4059	0.235576	5.40647
ENSMUSG00000035367	RecQ mediated genome instability 1 [Source:MGI Symbol;Acc:MGI:1921636]	Rmi1	protein_coding	0.908081	6.40479e-08	7.1935	4.00505e-06	694	1105	956	430	487	564	705.884	0.167942	5.40712
ENSMUSG00000085793	lin-52 homolog (C. elegans) [Source:MGI Symbol;Acc:MGI:3045391]	Lin52	protein_coding	0.695608	6.5475e-08	7.18392	4.06416e-06	1112	1247	1028	657	845	782	943.293	0.128741	5.40317
ENSMUSG00000091845	ribosomal protein L36, pseudogene 12 [Source:MGI Symbol;Acc:MGI:3782787]	Rpl36-ps12	processed_pseudogene	1.18611	6.78256e-08	7.16861	4.19418e-06	89	67	50	2	2	1	37.2468	0.219779	5.39684
ENSMUSG00000061130	protein phosphatase 1B, magnesium dependent, beta isoform [Source:MGI Symbol;Acc:MGI:101841]	Ppm1b	protein_coding	0.779673	6.8235e-08	7.16599	4.20364e-06	3344	3705	3358	1788	2864	1881	2820.45	0.144497	5.39576
ENSMUSG00000029614	ribosomal protein L6 [Source:MGI Symbol;Acc:MGI:108057]	Rpl6	protein_coding	1.20939	9.44786e-08	7.02467	5.79858e-06	111	139	103	5	17	3	65.2276	0.226604	5.33704
ENSMUSG00000047675	ribosomal protein S8 [Source:MGI Symbol;Acc:MGI:98166]	Rps8	protein_coding	1.25174	9.52235e-08	7.02126	5.82249e-06	131	92	90	14	12	19	62.5986	0.234602	5.33561
ENSMUSG00000073676	heat shock protein 1 (chaperonin 10) [Source:MGI Symbol;Acc:MGI:104680]	Hspe1	protein_coding	0.877335	9.60267e-08	7.01761	5.84978e-06	770	1056	778	539	485	417	675.279	0.164477	5.33409
ENSMUSG00000111197	predicted gene 10608 [Source:MGI Symbol;Acc:MGI:3642009]	Gm10608	processed_pseudogene	1.18799	1.04671e-07	6.98018	6.35273e-06	69	101	72	2	8	2	43.7375	0.223372	5.31842
ENSMUSG00000100319	predicted gene 5256 [Source:MGI Symbol;Acc:MGI:3644836]	Gm5256	processed_pseudogene	1.17532	1.30364e-07	6.88484	7.88296e-06	53	121	68	3	2	6	43.0049	0.222669	5.27833
ENSMUSG00000047676	ribosomal protein SA, pseudogene 10 [Source:MGI Symbol;Acc:MGI:3704228]	Rpsa-ps10	processed_pseudogene	1.16985	1.48873e-07	6.82719	8.96903e-06	55	72	48	2	3	3	31.6354	0.22266	5.25395
ENSMUSG00000029131	DnaJ heat shock protein family (Hsp40) member B6 [Source:MGI Symbol;Acc:MGI:1344381]	Dnajb6	protein_coding	0.741585	1.5172e-07	6.81896	9.10712e-06	1656	1937	1509	995	1354	938	1394.55	0.141242	5.25046
ENSMUSG00000011179	ornithine decarboxylase, structural 1 [Source:MGI Symbol;Acc:MGI:97402]	Odc1	protein_coding	0.77742	1.53774e-07	6.81312	9.19668e-06	813	1110	750	489	609	550	717.083	0.148137	5.24798
ENSMUSG00000000184	cyclin D2 [Source:MGI Symbol;Acc:MGI:88314]	Ccnd2	protein_coding	1.00217	1.60226e-07	6.79527	9.51312e-06	531	636	557	186	335	300	426.536	0.191239	5.2404
ENSMUSG00000086922	predicted gene 13835 [Source:MGI Symbol;Acc:MGI:3650921]	Gm13835	processed_pseudogene	0.7566	1.60152e-07	6.79547	9.51312e-06	1400	1554	1097	843	886	828	1102.14	0.144376	5.24049
ENSMUSG00000032096	archain 1 [Source:MGI Symbol;Acc:MGI:2387591]	Arcn1	protein_coding	0.468251	1.71378e-07	6.76604	1.01385e-05	7809	9297	8654	6077	8077	6820	7722.48	0.0895664	5.22797
ENSMUSG00000055302	Morf4 family associated protein 1 [Source:MGI Symbol;Acc:MGI:1914818]	Mrfap1	protein_coding	0.922326	1.73049e-07	6.76183	1.02005e-05	516	582	411	265	269	258	385.778	0.176482	5.22618
ENSMUSG00000037536	F-box protein 34 [Source:MGI Symbol;Acc:MGI:1926188]	Fbxo34	protein_coding	0.509492	1.74038e-07	6.75936	1.02221e-05	10164	14486	12165	8360	11041	9435	10823.1	0.097508	5.22512
ENSMUSG00000092056	predicted gene 7289 [Source:MGI Symbol;Acc:MGI:3644187]	Gm7289	processed_pseudogene	1.11968	1.80009e-07	6.74471	1.0535e-05	71	97	53	0	0	2	38.5769	0.214545	5.21888
ENSMUSG00000104126	predicted gene, 37486 [Source:MGI Symbol;Acc:MGI:5610714]	Gm37486	processed_pseudogene	0.913456	2.17136e-07	6.66327	1.26627e-05	590	722	566	312	419	268	480.606	0.176206	5.18403
ENSMUSG00000044285	predicted gene 1821 [Source:MGI Symbol;Acc:MGI:3037679]	Gm1821	transcribed_processed_pseudogene	1.01219	2.55484e-07	6.59264	1.47943e-05	358	455	332	181	149	191	280.113	0.196403	5.15364
ENSMUSG00000113300	predicted gene, 49371 [Source:MGI Symbol;Acc:MGI:6121588]	Gm49371	lincRNA	0.997502	2.55494e-07	6.59262	1.47943e-05	489	911	505	282	311	287	462.294	0.193553	5.15363
ENSMUSG00000035530	eukaryotic translation initiation factor 1 [Source:MGI Symbol;Acc:MGI:105125]	Eif1	protein_coding	0.712946	2.96572e-07	6.52787	1.71124e-05	1616	2237	1452	1055	1336	1079	1452.54	0.139095	5.12561
ENSMUSG00000066442	5, 10-methenyltetrahydrofolate synthetase [Source:MGI Symbol;Acc:MGI:1340032]	Mthfs	protein_coding	1.18712	2.99252e-07	6.52396	1.72064e-05	83	117	65	14	7	10	50.7026	0.231681	5.12392
ENSMUSG00000024248	cytochrome c oxidase subunit 7A2 like [Source:MGI Symbol;Acc:MGI:106015]	Cox7a2l	protein_coding	0.784559	3.01535e-07	6.52066	1.72771e-05	952	1413	971	718	676	623	889.407	0.15316	5.12249
ENSMUSG00000068141	predicted pseudogene 10232 [Source:MGI Symbol;Acc:MGI:3641637]	Gm10232	processed_pseudogene	1.03414	3.44989e-07	6.46219	1.9698e-05	381	471	416	153	259	149	306.891	0.20289	5.09705
ENSMUSG00000047554	transmembrane protein 41B [Source:MGI Symbol;Acc:MGI:1289225]	Tmem41b	protein_coding	0.66824	3.46987e-07	6.45969	1.97433e-05	2173	2079	2028	1482	1485	1354	1772.58	0.131131	5.09596
ENSMUSG00000026851	cDNA sequence BC005624 [Source:MGI Symbol;Acc:MGI:2385132]	BC005624	protein_coding	0.903601	3.49187e-07	6.45694	1.97998e-05	562	508	579	285	298	304	428.019	0.177359	5.09476
ENSMUSG00000111119	predicted gene, 34005 [Source:MGI Symbol;Acc:MGI:5593164]	Gm34005	processed_pseudogene	1.11997	3.51978e-07	6.45348	1.98892e-05	346	313	305	147	97	103	224.077	0.219893	5.09325
ENSMUSG00000095419	predicted gene 14328 [Source:MGI Symbol;Acc:MGI:3651951]	Gm14328	processed_pseudogene	1.13341	3.73683e-07	6.4275	2.10431e-05	152	191	142	49	55	62	110.057	0.22303	5.0819
ENSMUSG00000103801	spindlin family, member 3, pseudogene [Source:MGI Symbol;Acc:MGI:3780056]	Spin3-ps	processed_pseudogene	0.431568	4.3802e-07	6.35851	2.45816e-05	4074	4969	4492	3558	4223	3510	4100.71	0.0854311	5.05165
ENSMUSG00000092074	dynein light chain Tctex-type 1A [Source:MGI Symbol;Acc:MGI:3807506]	Dynlt1a	protein_coding	1.16076	4.4258e-07	6.35401	2.47527e-05	191	222	192	77	44	58	133.777	0.229868	5.04967
ENSMUSG00000060143	predicted gene 10076 [Source:MGI Symbol;Acc:MGI:3704451]	Gm10076	lincRNA	1.1864	4.60711e-07	6.33657	2.56791e-05	147	129	106	36	27	25	81.0145	0.235304	5.04199
ENSMUSG00000037070	RNA binding motif protein, X-linked like-1 [Source:MGI Symbol;Acc:MGI:1343045]	Rbmxl1	protein_coding	1.17376	4.69163e-07	6.32868	2.60616e-05	111	136	123	25	35	40	79.9927	0.232958	5.03851
ENSMUSG00000070837	aurora kinase C [Source:MGI Symbol;Acc:MGI:1321119]	Aurkc	protein_coding	0.75099	4.95053e-07	6.30535	2.74069e-05	1169	1892	1473	943	1075	820	1221.22	0.149355	5.02822
ENSMUSG00000038990	CDK5 and Abl enzyme substrate 2 [Source:MGI Symbol;Acc:MGI:2182335]	Cables2	protein_coding	0.892533	5.03767e-07	6.29777	2.77954e-05	545	601	506	315	260	310	426.46	0.177623	5.02487
ENSMUSG00000082195	predicted gene 13034 [Source:MGI Symbol;Acc:MGI:3650252]	Gm13034	processed_pseudogene	1.10936	5.21533e-07	6.28272	2.85799e-05	53	82	94	7	2	3	41.8209	0.221066	5.01822
ENSMUSG00000043483	predicted gene 6863 [Source:MGI Symbol;Acc:MGI:3647386]	Gm6863	processed_pseudogene	0.56735	5.23219e-07	6.28132	2.85799e-05	2992	3461	2864	2376	2547	2034	2700.52	0.113072	5.0176
ENSMUSG00000078578	ubiquitin-conjugating enzyme E2D 3 [Source:MGI Symbol;Acc:MGI:1913355]	Ube2d3	protein_coding	0.469889	5.21168e-07	6.28302	2.85799e-05	10815	13378	11998	9722	9311	10104	10823	0.0936342	5.01835
ENSMUSG00000081752	spermine synthase, pseudogene [Source:MGI Symbol;Acc:MGI:3705601]	Sms-ps	processed_pseudogene	0.623506	5.36013e-07	6.27082	2.91816e-05	1309	1826	1726	1081	1234	1135	1377.82	0.124379	5.01295
ENSMUSG00000091905	predicted gene 6395 [Source:MGI Symbol;Acc:MGI:3645295]	Gm6395	processed_pseudogene	1.06011	5.42186e-07	6.26585	2.94199e-05	55	59	61	1	0	0	30.9011	0.211567	5.01075
ENSMUSG00000028568	basic transcription factor 3-like 4 [Source:MGI Symbol;Acc:MGI:1915312]	Btf3l4	protein_coding	0.707965	5.48284e-07	6.26099	2.96526e-05	598	760	629	400	496	412	547.323	0.14135	5.0086
ENSMUSG00000085917	predicted gene 15899 [Source:MGI Symbol;Acc:MGI:3801945]	Gm15899	processed_pseudogene	1.17753	5.89068e-07	6.22983	3.17535e-05	70	105	102	18	19	20	56.9848	0.235753	4.99477
ENSMUSG00000059159	predicted pseudogene 8129 [Source:MGI Symbol;Acc:MGI:3646863]	Gm8129	processed_pseudogene	1.04702	6.00147e-07	6.22174	3.22446e-05	68	74	51	0	0	0	33.7447	0.209775	4.99117
ENSMUSG00000021131	ERH mRNA splicing and mitosis factor [Source:MGI Symbol;Acc:MGI:108089]	Erh	protein_coding	0.875036	6.30108e-07	6.20058	3.37437e-05	378	481	371	199	268	208	317.73	0.175648	4.98175
ENSMUSG00000104623	predicted gene 6394 [Source:MGI Symbol;Acc:MGI:3648319]	Gm6394	processed_pseudogene	1.15625	6.32355e-07	6.19904	3.37537e-05	105	78	99	18	9	11	56.0706	0.232129	4.98106
ENSMUSG00000036478	B cell translocation gene 1, anti-proliferative [Source:MGI Symbol;Acc:MGI:88215]	Btg1	protein_coding	0.862333	6.49851e-07	6.18719	3.4575e-05	395	433	430	233	229	239	328.959	0.173306	4.97578
ENSMUSG00000038482	transcription factor Dp 1 [Source:MGI Symbol;Acc:MGI:101934]	Tfdp1	protein_coding	0.738108	6.54134e-07	6.18433	3.46903e-05	793	1057	1040	525	659	662	787.995	0.148378	4.97451
ENSMUSG00000016559	H3 histone, family 3B [Source:MGI Symbol;Acc:MGI:1101768]	H3f3b	protein_coding	0.507556	6.8824e-07	6.16226	3.63813e-05	9515	11767	9262	7932	9055	6937	9006.21	0.102234	4.96465
ENSMUSG00000004285	ATPase, H+ transporting, lysosomal V1 subunit F [Source:MGI Symbol;Acc:MGI:1913394]	Atp6v1f	protein_coding	0.646409	7.05994e-07	6.1512	3.71997e-05	664	829	703	472	545	511	618.293	0.130332	4.95971
ENSMUSG00000094090	predicted gene 8494 [Source:MGI Symbol;Acc:MGI:3645114]	Gm8494	processed_pseudogene	1.04197	7.76127e-07	6.11007	4.07641e-05	282	307	215	118	103	113	192.294	0.210871	4.94128
ENSMUSG00000040078	prostaglandin E synthase 3, pseudogene [Source:MGI Symbol;Acc:MGI:3704271]	Ptges3-ps	processed_pseudogene	0.778506	8.19344e-07	6.08653	4.28964e-05	712	827	605	379	511	424	575.736	0.157889	4.9307
ENSMUSG00000083337	predicted gene 11539 [Source:MGI Symbol;Acc:MGI:3651911]	Gm11539	processed_pseudogene	1.06985	8.3863e-07	6.07643	4.37663e-05	70	63	46	1	4	2	32.5539	0.217177	4.92616
ENSMUSG00000058927	predicted gene 10053 [Source:MGI Symbol;Acc:MGI:3704493]	Gm10053	protein_coding	1.13777	8.61293e-07	6.06485	4.48064e-05	133	173	146	54	36	43	99.4925	0.23121	4.92094
ENSMUSG00000079424	predicted gene 3259 [Source:MGI Symbol;Acc:MGI:3781437]	Gm3259	protein_coding	0.900246	8.6549e-07	6.06274	4.48822e-05	337	365	310	172	200	164	259.743	0.182977	4.91999
ENSMUSG00000101431	predicted gene 7901 [Source:MGI Symbol;Acc:MGI:3645047]	Gm7901	processed_pseudogene	1.15191	8.89695e-07	6.05076	4.59919e-05	100	84	90	19	11	16	55.6507	0.234386	4.91459
ENSMUSG00000109755	predicted gene 8489 [Source:MGI Symbol;Acc:MGI:3648086]	Gm8489	processed_pseudogene	1.07245	9.12023e-07	6.03999	4.69979e-05	193	283	194	78	75	101	155.328	0.218433	4.90973
ENSMUSG00000020485	suppressor of Ty 4A [Source:MGI Symbol;Acc:MGI:107416]	Supt4a	protein_coding	0.959969	9.61128e-07	6.01722	4.93731e-05	291	391	309	173	171	131	245.722	0.195935	4.89943
ENSMUSG00000045294	insulin induced gene 1 [Source:MGI Symbol;Acc:MGI:1916289]	Insig1	protein_coding	0.585162	9.99619e-07	6.00017	5.11899e-05	3132	4178	4067	2397	2915	3041	3269.53	0.119623	4.89171
ENSMUSG00000014402	tumor susceptibility gene 101 [Source:MGI Symbol;Acc:MGI:106581]	Tsg101	protein_coding	0.64738	1.03651e-06	5.98443	5.29137e-05	1981	3162	2685	1675	2055	1678	2187.72	0.132535	4.88458
ENSMUSG00000099870	predicted gene 7200 [Source:MGI Symbol;Acc:MGI:3644666]	Gm7200	processed_pseudogene	1.14955	1.07421e-06	5.96891	5.46678e-05	76	102	108	18	24	23	59.9314	0.235683	4.87753
ENSMUSG00000007815	ras homolog family member A [Source:MGI Symbol;Acc:MGI:1096342]	Rhoa	protein_coding	0.659803	1.08461e-06	5.96473	5.50263e-05	1056	1117	1098	659	784	815	921.703	0.135327	4.87563
ENSMUSG00000081865	predicted gene 15484 [Source:MGI Symbol;Acc:MGI:3705726]	Gm15484	processed_pseudogene	1.14192	1.12332e-06	5.9495	5.68142e-05	176	222	158	55	29	59	119.15	0.234542	4.86871
ENSMUSG00000056412	predicted gene 12396 [Source:MGI Symbol;Acc:MGI:3649201]	Gm12396	processed_pseudogene	0.777855	1.15036e-06	5.93916	5.80031e-05	741	802	691	495	463	403	601.822	0.159921	4.864
ENSMUSG00000040652	ornithine decarboxylase antizyme 2 [Source:MGI Symbol;Acc:MGI:109492]	Oaz2	protein_coding	0.855868	1.21627e-06	5.91497	6.11381e-05	876	925	677	459	406	509	646.574	0.17636	4.85297
ENSMUSG00000106313	predicted gene 9402 [Source:MGI Symbol;Acc:MGI:3648832]	Gm9402	processed_pseudogene	0.984256	1.29031e-06	5.8893	6.46617e-05	318	330	269	154	127	138	225.761	0.203307	4.84124
ENSMUSG00000075502	kelch repeat and BTB (POZ) domain containing 6 [Source:MGI Symbol;Acc:MGI:3643058]	Kbtbd6	protein_coding	-0.682381	1.38791e-06	5.85764	6.93406e-05	714	1007	771	1381	1958	1445	1165.02	0.141375	-4.82673
ENSMUSG00000057278	small nuclear ribonucleoprotein polypeptide G [Source:MGI Symbol;Acc:MGI:1915261]	Snrpg	protein_coding	0.945628	1.4231e-06	5.84676	7.08827e-05	319	367	288	174	164	136	243.45	0.196118	4.82174
ENSMUSG00000050490	predicted gene 8394 [Source:MGI Symbol;Acc:MGI:3647964]	Gm8394	processed_pseudogene	0.740292	1.47018e-06	5.83263	7.30058e-05	520	779	644	378	430	415	525.504	0.153739	4.81525
ENSMUSG00000027341	transmembrane protein 230 [Source:MGI Symbol;Acc:MGI:1917862]	Tmem230	protein_coding	0.842926	1.48035e-06	5.82964	7.31435e-05	1086	1419	1073	530	925	575	931.829	0.175104	4.81387
ENSMUSG00000055044	PDZ and LIM domain 1 (elfin) [Source:MGI Symbol;Acc:MGI:1860611]	Pdlim1	protein_coding	0.822	1.48189e-06	5.82919	7.31435e-05	970	1658	1144	661	901	603	982.243	0.170764	4.81366
ENSMUSG00000059005	heterogeneous nuclear ribonucleoprotein A3 [Source:MGI Symbol;Acc:MGI:1917171]	Hnrnpa3	protein_coding	1.12318	1.89479e-06	5.72244	9.32429e-05	91	133	183	31	26	36	85.6476	0.235748	4.76433
ENSMUSG00000032314	electron transferring flavoprotein, alpha polypeptide [Source:MGI Symbol;Acc:MGI:106092]	Etfa	protein_coding	0.635566	1.94592e-06	5.71088	9.54723e-05	1232	1787	1395	979	1195	905	1239.07	0.133551	4.75896
ENSMUSG00000043716	ribosomal protein L7 [Source:MGI Symbol;Acc:MGI:98073]	Rpl7	protein_coding	1.12108	1.97557e-06	5.70431	9.66378e-05	104	195	101	37	25	29	82.7019	0.235724	4.75591
ENSMUSG00000082938	predicted pseudogene 2810 [Source:MGI Symbol;Acc:MGI:3780980]	Gm2810	processed_pseudogene	1.11952	2.01001e-06	5.6968	9.80297e-05	106	99	81	14	27	20	59.6033	0.235568	4.75242
ENSMUSG00000040782	COP1, E3 ubiquitin ligase [Source:MGI Symbol;Acc:MGI:1347046]	Cop1	protein_coding	0.642194	2.14443e-06	5.66869	0.000104275	869	1080	1036	662	793	626	841.492	0.135504	4.73931
ENSMUSG00000023051	TARBP2, RISC loading complex RNA binding subunit [Source:MGI Symbol;Acc:MGI:103027]	Tarbp2	protein_coding	0.757284	2.17166e-06	5.66321	0.000105287	658	995	797	524	469	508	657.215	0.159874	4.73676
ENSMUSG00000071497	nuclear transport factor 2, pseudogene 1 [Source:MGI Symbol;Acc:MGI:108008]	Nutf2-ps1	protein_coding	1.09387	2.22537e-06	5.6526	0.000107573	78	98	90	6	21	12	52.3214	0.231174	4.7318
ENSMUSG00000030869	NADH:ubiquinone oxidoreductase subunit AB1 [Source:MGI Symbol;Acc:MGI:1917566]	Ndufab1	protein_coding	0.689874	2.30607e-06	5.63713	0.000111146	781	943	694	516	599	490	668.472	0.146019	4.72457
ENSMUSG00000114550	predicted, 46426 [Source:NCBI gene;Acc:108168097]	AC167192.1	processed_pseudogene	1.08873	2.32857e-06	5.63291	0.000111901	695	343	397	118	186	174	331.012	0.230537	4.72259
ENSMUSG00000117192	ubiquitin-conjugating enzyme E2C (Ube2c) pseudogene	AC151284.1	processed_pseudogene	1.00042	2.39918e-06	5.61994	0.000114622	247	262	204	85	129	96	172.289	0.21211	4.71652
ENSMUSG00000028676	serine/arginine-rich splicing factor 10 [Source:MGI Symbol;Acc:MGI:1333805]	Srsf10	protein_coding	0.659215	2.39234e-06	5.62118	0.000114622	745	1029	963	576	650	642	764.503	0.13975	4.7171
ENSMUSG00000080767	predicted gene 15595 [Source:MGI Symbol;Acc:MGI:3783042]	Gm15595	processed_pseudogene	0.870142	2.52618e-06	5.59754	0.000120339	441	625	450	250	242	317	388.066	0.1849	4.70601
ENSMUSG00000028639	Y box protein 1 [Source:MGI Symbol;Acc:MGI:99146]	Ybx1	protein_coding	0.70165	2.67578e-06	5.57255	0.000127096	878	1140	871	541	781	577	793.499	0.14947	4.69426
ENSMUSG00000091449	predicted gene 10269 [Source:MGI Symbol;Acc:MGI:3642381]	Gm10269	processed_pseudogene	1.10438	2.69344e-06	5.56969	0.000127565	79	119	92	26	26	22	61.7025	0.235328	4.69291
ENSMUSG00000096910	zinc finger protein 955B [Source:MGI Symbol;Acc:MGI:4834573]	Zfp955b	protein_coding	0.81575	2.84454e-06	5.54599	0.000134333	814	699	626	381	456	412	569.589	0.174241	4.68174
ENSMUSG00000028691	peroxiredoxin 1 [Source:MGI Symbol;Acc:MGI:99523]	Prdx1	protein_coding	0.619415	2.95178e-06	5.52992	0.000138996	5798	6558	5107	4421	3655	4239	4961.87	0.132519	4.67415
ENSMUSG00000083027	predicted gene 13140 [Source:MGI Symbol;Acc:MGI:3649297]	Gm13140	processed_pseudogene	1.0802	2.9663e-06	5.52778	0.00013928	175	198	247	8	46	42	123.423	0.231152	4.67314
ENSMUSG00000076258	predicted gene, 23935 [Source:MGI Symbol;Acc:MGI:5453712]	Gm23935	miRNA	1.01552	3.51768e-06	5.45374	0.000164698	364	258	343	114	166	120	232.946	0.218956	4.63802
ENSMUSG00000034437	predicted gene 9761 [Source:MGI Symbol;Acc:MGI:3708640]	Gm9761	processed_pseudogene	1.06329	3.99504e-06	5.39848	0.000186515	129	145	127	45	37	50	90.6749	0.230566	4.61164
ENSMUSG00000017404	ribosomal protein L19 [Source:MGI Symbol;Acc:MGI:98020]	Rpl19	protein_coding	1.06744	4.11952e-06	5.38515	0.00019178	82	72	79	15	8	14	46.9568	0.231786	4.60526
ENSMUSG00000024750	zinc finger, AN1-type domain 5 [Source:MGI Symbol;Acc:MGI:1278334]	Zfand5	protein_coding	0.365376	4.17844e-06	5.37899	0.000193972	4851	5835	4812	4293	4628	4612	4791.76	0.0793898	4.6023
ENSMUSG00000112160	cDNA sequence BC024063 [Source:MGI Symbol;Acc:MGI:2670978]	BC024063	protein_coding	1.0399	4.36766e-06	5.35975	0.000202183	674	895	685	338	143	324	518.474	0.226406	4.59307
ENSMUSG00000028452	valosin containing protein [Source:MGI Symbol;Acc:MGI:99919]	Vcp	protein_coding	1.00177	4.44266e-06	5.35236	0.000205076	212	287	249	71	137	103	177.602	0.218274	4.58952
ENSMUSG00000090610	predicted gene 3571 [Source:MGI Symbol;Acc:MGI:3781748]	Gm3571	processed_pseudogene	1.05522	4.60641e-06	5.33664	0.000212037	172	158	153	45	75	45	110.293	0.230298	4.58196
ENSMUSG00000024273	RIKEN cDNA 2700062C07 gene [Source:MGI Symbol;Acc:MGI:1915296]	2700062C07Rik	protein_coding	0.554597	4.65656e-06	5.33193	0.000213745	2417	3192	2463	1936	2377	1737	2333.57	0.121099	4.57969
ENSMUSG00000022272	myosin X [Source:MGI Symbol;Acc:MGI:107716]	Myo10	protein_coding	-0.978162	4.67911e-06	5.32984	0.00021418	67	182	21	1744	2603	2171	1042.07	0.213634	-4.57868
ENSMUSG00000048100	TATA-box binding protein associated factor 13 [Source:MGI Symbol;Acc:MGI:1913500]	Taf13	protein_coding	0.761441	4.72155e-06	5.32591	0.000215521	858	1321	1058	562	848	570	863.765	0.16637	4.57679
ENSMUSG00000060475	Wilms tumour 1-associating protein [Source:MGI Symbol;Acc:MGI:1926395]	Wtap	protein_coding	0.921213	4.76544e-06	5.3219	0.00021692	314	393	368	135	235	161	268.718	0.201364	4.57486
ENSMUSG00000025981	coenzyme Q10B [Source:MGI Symbol;Acc:MGI:1915126]	Coq10b	protein_coding	0.53485	5.05079e-06	5.29664	0.000229272	1451	2100	1595	1227	1333	1339	1493.76	0.117223	4.56267
ENSMUSG00000116114	predicted gene, 35853 [Source:MGI Symbol;Acc:MGI:5595012]	Gm35853	antisense	-0.771065	5.38e-06	5.26922	0.000243542	251	361	348	584	724	737	481.428	0.169487	-4.5494
ENSMUSG00000082496	predicted gene 6798 [Source:MGI Symbol;Acc:MGI:3646258]	Gm6798	processed_pseudogene	0.889809	5.51935e-06	5.25811	0.000249161	359	359	274	160	173	178	252.809	0.19582	4.54401
ENSMUSG00000034333	zinc finger, BED type containing 4 [Source:MGI Symbol;Acc:MGI:2682302]	Zbed4	protein_coding	1.06237	5.53553e-06	5.25684	0.000249205	151	88	87	25	22	16	68.0209	0.233828	4.5434
ENSMUSG00000069678	polycomb group ring finger 1 [Source:MGI Symbol;Acc:MGI:1917087]	Pcgf1	protein_coding	0.504075	5.88017e-06	5.23061	0.000263996	2647	3258	2450	2122	2445	1967	2461.36	0.111259	4.53065
ENSMUSG00000104303	predicted gene, 36976 [Source:MGI Symbol;Acc:MGI:5610204]	Gm36976	TEC	1.04878	6.0982e-06	5.2148	0.000273036	109	84	70	19	10	15	53.4461	0.23188	4.52296
ENSMUSG00000039159	ubiquitin-conjugating enzyme E2H [Source:MGI Symbol;Acc:MGI:104632]	Ube2h	protein_coding	0.613136	6.31538e-06	5.1996	0.000281989	2030	2419	2581	1449	2036	1554	2003.27	0.135783	4.51555
ENSMUSG00000061518	cytochrome c oxidase subunit 5B [Source:MGI Symbol;Acc:MGI:88475]	Cox5b	protein_coding	0.827137	6.34362e-06	5.19766	0.000282481	631	610	466	310	372	283	448.095	0.183214	4.5146
ENSMUSG00000105779	predicted gene 6439 [Source:MGI Symbol;Acc:MGI:3647442]	Gm6439	processed_pseudogene	1.03172	6.50409e-06	5.18681	0.000288357	59	58	68	10	10	6	36.6203	0.228798	4.5093
ENSMUSG00000029095	actin-binding LIM protein 2 [Source:MGI Symbol;Acc:MGI:2385758]	Ablim2	protein_coding	-0.447724	6.51078e-06	5.18637	0.000288357	1341	1555	1313	1978	2394	2258	1755.01	0.0992937	-4.50909
ENSMUSG00000091549	predicted gene 6548 [Source:MGI Symbol;Acc:MGI:3644071]	Gm6548	processed_pseudogene	0.932864	6.74726e-06	5.17087	0.000298025	102	58	68	4	1	0	41.6109	0.207234	4.50151
ENSMUSG00000071072	prostaglandin E synthase 3 [Source:MGI Symbol;Acc:MGI:1929282]	Ptges3	protein_coding	0.671636	6.79093e-06	5.16807	0.000299148	1246	1343	1095	677	1020	799	1027.01	0.149248	4.50014
ENSMUSG00000063253	short coiled-coil protein [Source:MGI Symbol;Acc:MGI:1927654]	Scoc	protein_coding	0.808731	6.82707e-06	5.16577	0.000299934	519	737	479	316	396	280	452.868	0.179758	4.49901
ENSMUSG00000009013	dynein light chain LC8-type 1 [Source:MGI Symbol;Acc:MGI:1861457]	Dynll1	protein_coding	0.646655	7.12059e-06	5.14748	0.000311992	2679	2265	2236	1618	1752	1624	2038.33	0.14402	4.49005
ENSMUSG00000093826	predicted gene 6900 [Source:MGI Symbol;Acc:MGI:3645052]	Gm6900	processed_pseudogene	0.928503	7.37887e-06	5.13201	0.000322447	45	61	45	1	0	2	26.7192	0.207141	4.48246
ENSMUSG00000023004	tubulin, alpha 1B [Source:MGI Symbol;Acc:MGI:107804]	Tuba1b	protein_coding	0.916711	7.41061e-06	5.13015	0.000322972	223	269	196	97	126	111	171.222	0.204553	4.48154
ENSMUSG00000027082	tissue factor pathway inhibitor [Source:MGI Symbol;Acc:MGI:1095418]	Tfpi	protein_coding	-0.909083	7.53418e-06	5.12296	0.000327487	0	0	0	51	63	82	30.1477	0.20301	-4.47801
ENSMUSG00000080242	ATPase, H+ transporting, lysosomal V0 subunit C, pseudogene 2 [Source:MGI Symbol;Acc:MGI:2151816]	Atp6v0c-ps2	processed_pseudogene	0.536173	7.57957e-06	5.12036	0.000328588	1928	2382	1908	1422	1901	1424	1812.17	0.119769	4.47673
ENSMUSG00000070031	Sp140 nuclear body protein [Source:MGI Symbol;Acc:MGI:3702467]	Sp140	protein_coding	1.04204	7.69569e-06	5.11375	0.000332742	106	71	81	14	13	21	53.3802	0.232938	4.47348
ENSMUSG00000084378	predicted gene 15238 [Source:MGI Symbol;Acc:MGI:3641766]	Gm15238	processed_pseudogene	0.659341	7.92967e-06	5.10074	0.000341957	514	627	600	375	429	380	486.614	0.1476	4.46707
ENSMUSG00000024896	multiple inositol polyphosphate histidine phosphatase 1 [Source:MGI Symbol;Acc:MGI:1336159]	Minpp1	protein_coding	0.713182	7.95235e-06	5.0995	0.000342035	533	579	582	328	368	396	465.5	0.159675	4.46646
ENSMUSG00000082218	predicted gene 13602 [Source:MGI Symbol;Acc:MGI:3649285]	Gm13602	processed_pseudogene	0.936121	8.30295e-06	5.08077	0.000356179	40	70	35	2	2	1	25.6548	0.210024	4.45722
ENSMUSG00000059775	ribosomal protein S26, pseudogene 1 [Source:MGI Symbol;Acc:MGI:3704322]	Rps26-ps1	transcribed_processed_pseudogene	1.04781	8.50659e-06	5.07024	0.000363962	97	114	90	28	35	21	65.4584	0.235356	4.45202
ENSMUSG00000069972	ribosomal protein S13, pseudogene 2 [Source:MGI Symbol;Acc:MGI:3704295]	Rps13-ps2	processed_pseudogene	0.673411	8.98787e-06	5.04634	0.000383553	682	730	613	458	451	446	564.096	0.151663	4.44019
ENSMUSG00000031950	gamma-aminobutyric acid (GABA) A receptor-associated protein-like 2 [Source:MGI Symbol;Acc:MGI:1890602]	Gabarapl2	protein_coding	0.996108	9.24439e-06	5.03412	0.000393475	280	205	254	103	114	77	176.595	0.224646	4.43413
ENSMUSG00000044533	ribosomal protein S2 [Source:MGI Symbol;Acc:MGI:105110]	Rps2	protein_coding	1.03954	9.39042e-06	5.02732	0.000398655	111	126	144	41	17	22	79.4819	0.234619	4.43075
ENSMUSG00000111795	predicted gene, 47620 [Source:MGI Symbol;Acc:MGI:6096683]	Gm47620	processed_pseudogene	0.996682	1.00903e-05	4.9961	0.000427261	49	57	60	5	10	6	32.2882	0.225737	4.41523
ENSMUSG00000079641	ribosomal protein L39 [Source:MGI Symbol;Acc:MGI:1914498]	Rpl39	protein_coding	1.02748	1.0119e-05	4.99486	0.000427369	549	446	459	218	85	170	331.747	0.232745	4.41462
ENSMUSG00000107383	predicted gene 4366 [Source:MGI Symbol;Acc:MGI:3782551]	Gm4366	processed_pseudogene	1.03741	1.07069e-05	4.97034	0.000451038	72	158	115	27	32	33	73.3494	0.235648	4.40238
ENSMUSG00000070343	predicted gene 10288 [Source:MGI Symbol;Acc:MGI:3704227]	Gm10288	processed_pseudogene	1.02462	1.10666e-05	4.95599	0.000464996	115	78	63	17	17	16	53.2192	0.233121	4.39521
ENSMUSG00000081152	predicted gene 12430 [Source:MGI Symbol;Acc:MGI:3651061]	Gm12430	processed_pseudogene	0.768394	1.1239e-05	4.94927	0.00047103	397	518	406	223	323	248	351.51	0.174959	4.39185
ENSMUSG00000112994	predicted gene, 46312 [Source:MGI Symbol;Acc:MGI:5825949]	Gm46312	processed_pseudogene	1.02804	1.13179e-05	4.94623	0.000473128	91	118	97	34	29	31	67.881	0.234161	4.39033
ENSMUSG00000112546	predicted gene 6992 [Source:MGI Symbol;Acc:MGI:3647975]	Gm6992	processed_pseudogene	0.910815	1.1564e-05	4.93689	0.000482186	180	206	203	89	100	95	146.933	0.207681	4.38565
ENSMUSG00000078566	BCL2/adenovirus E1B interacting protein 3 [Source:MGI Symbol;Acc:MGI:109326]	Bnip3	protein_coding	0.939378	1.21709e-05	4.91468	0.000506206	219	202	187	91	102	83	149.601	0.214739	4.3745
ENSMUSG00000090136	predicted gene 10177 [Source:MGI Symbol;Acc:MGI:3704330]	Gm10177	transcribed_processed_pseudogene	1.00409	1.25183e-05	4.90245	0.000519336	329	313	249	148	80	90	206.398	0.229856	4.36836
ENSMUSG00000022427	translocase of outer mitochondrial membrane 22 [Source:MGI Symbol;Acc:MGI:2450248]	Tomm22	protein_coding	0.601091	1.28364e-05	4.89156	0.000531187	1172	1490	1255	985	856	946	1114.61	0.137774	4.36288
ENSMUSG00000073471	radial spoke 3A homolog (Chlamydomonas) [Source:MGI Symbol;Acc:MGI:1914082]	Rsph3a	protein_coding	0.983902	1.58709e-05	4.7994	0.000651823	92	74	55	6	14	14	44.2143	0.227954	4.31624
ENSMUSG00000035649	zinc finger, CCHC domain containing 7 [Source:MGI Symbol;Acc:MGI:2442912]	Zcchc7	protein_coding	-0.706489	1.5842e-05	4.80019	0.000651823	365	602	397	819	1035	859	651.805	0.163666	-4.31664
ENSMUSG00000076432	tyrosine 3-monooxygenase/tryptophan 5-monooxygenase activation protein theta [Source:MGI Symbol;Acc:MGI:891963]	Ywhaq	protein_coding	0.461377	1.58225e-05	4.80073	0.000651823	1263	1641	1448	1133	1253	1130	1300.34	0.106876	4.31692
ENSMUSG00000017428	proteasome (prosome, macropain) 26S subunit, non-ATPase, 11 [Source:MGI Symbol;Acc:MGI:1916327]	Psmd11	protein_coding	0.648879	1.59837e-05	4.79632	0.000654814	1379	1662	1450	873	1335	882	1256.71	0.150389	4.31468
ENSMUSG00000027014	CWC22 spliceosome-associated protein [Source:MGI Symbol;Acc:MGI:2136773]	Cwc22	protein_coding	0.740544	1.63119e-05	4.7875	0.000666592	647	915	968	463	629	474	681.3	0.171813	4.31018
ENSMUSG00000041231	ubiquitin-like domain containing CTD phosphatase 1 [Source:MGI Symbol;Acc:MGI:1933105]	Ublcp1	protein_coding	0.773421	1.67118e-05	4.77698	0.000679544	392	482	374	253	224	257	331.247	0.179664	4.30482
ENSMUSG00000053907	methionine adenosyltransferase II, alpha [Source:MGI Symbol;Acc:MGI:2443731]	Mat2a	protein_coding	0.59251	1.66888e-05	4.77758	0.000679544	1129	1350	1310	781	1114	857	1084.3	0.137629	4.30513
ENSMUSG00000045690	WD repeat domain 89 [Source:MGI Symbol;Acc:MGI:1919588]	Wdr89	protein_coding	0.580565	1.69905e-05	4.76979	0.000689166	1414	1388	1337	988	1138	916	1196.04	0.134979	4.30116
ENSMUSG00000062081	predicted gene 6055 [Source:MGI Symbol;Acc:MGI:3648620]	Gm6055	processed_pseudogene	0.971315	1.88959e-05	4.72363	0.000764562	63	77	72	15	11	5	41.8799	0.227073	4.27755
ENSMUSG00000105461	predicted gene 4742 [Source:MGI Symbol;Acc:MGI:3645661]	Gm4742	processed_pseudogene	0.988106	1.90057e-05	4.72112	0.000767111	124	152	106	49	49	38	87.5277	0.231068	4.27626
ENSMUSG00000081179	predicted gene 13136 [Source:MGI Symbol;Acc:MGI:3649290]	Gm13136	processed_pseudogene	0.91406	2.04513e-05	4.68928	0.000823429	68	61	75	3	11	2	38.446	0.214573	4.25991
ENSMUSG00000036835	presenilin enhancer gamma secretase subunit [Source:MGI Symbol;Acc:MGI:1913590]	Psenen	protein_coding	0.846925	2.05712e-05	4.68674	0.000826228	215	247	233	109	141	119	178.332	0.198874	4.2586
ENSMUSG00000024480	adaptor-related protein complex 3, sigma 1 subunit [Source:MGI Symbol;Acc:MGI:1337062]	Ap3s1	protein_coding	0.913785	2.10181e-05	4.67741	0.00084211	177	213	156	84	83	84	133.971	0.214817	4.25379
ENSMUSG00000024646	cytochrome b5 type A (microsomal) [Source:MGI Symbol;Acc:MGI:1926952]	Cyb5a	protein_coding	-0.411352	2.21371e-05	4.65488	0.000884783	2355	2972	2386	3995	4037	3717	3157.18	0.0969673	-4.24217
ENSMUSG00000079477	RAB7, member RAS oncogene family [Source:MGI Symbol;Acc:MGI:105068]	Rab7	protein_coding	0.390587	2.22294e-05	4.65307	0.000886309	5939	8394	6565	5465	6705	5662	6369.49	0.0920928	4.24123
ENSMUSG00000087260	late endosomal/lysosomal adaptor, MAPK and MTOR activator 5 [Source:MGI Symbol;Acc:MGI:1915826]	Lamtor5	protein_coding	0.659656	2.28859e-05	4.64043	0.000910269	1268	1683	1212	997	808	965	1153.26	0.155774	4.2347
ENSMUSG00000038116	PHD finger protein 20 [Source:MGI Symbol;Acc:MGI:2444148]	Phf20	protein_coding	0.458522	2.43469e-05	4.61356	0.000966034	3133	3894	2831	2560	2952	2463	2943.93	0.108635	4.22077
ENSMUSG00000023186	von Willebrand factor A domain containing 5A [Source:MGI Symbol;Acc:MGI:1915026]	Vwa5a	protein_coding	-0.834848	2.57138e-05	4.58983	0.00101535	0	0	0	42	74	64	27.4565	0.198375	-4.20844
ENSMUSG00000039684	predicted pseudogene 5422 [Source:MGI Symbol;Acc:MGI:3643411]	Gm5422	transcribed_processed_pseudogene	0.454636	2.5668e-05	4.59061	0.00101535	1980	2122	1822	1476	1707	1651	1782.19	0.108019	4.20884
ENSMUSG00000022829	syntaxin binding protein 5-like [Source:MGI Symbol;Acc:MGI:2443815]	Stxbp5l	protein_coding	-0.79241	2.90929e-05	4.53621	0.00114602	173	237	252	406	559	537	345.871	0.189551	-4.18045
ENSMUSG00000001270	creatine kinase, brain [Source:MGI Symbol;Acc:MGI:88407]	Ckb	protein_coding	0.510969	2.99303e-05	4.52389	0.00117618	3246	5028	4107	2857	3747	2953	3612.43	0.122417	4.174
ENSMUSG00000036427	glucose phosphate isomerase 1 [Source:MGI Symbol;Acc:MGI:95797]	Gpi1	protein_coding	0.666727	3.02979e-05	4.51859	0.00118778	766	1144	1156	640	760	639	847.233	0.15984	4.17122
ENSMUSG00000073198	BCL2/adenovirus E1B interacting protein 3-like, pseudogene [Source:MGI Symbol;Acc:MGI:3642435]	Bnip3l-ps	transcribed_processed_pseudogene	0.65692	3.06648e-05	4.51336	0.00119929	616	880	652	508	490	435	594.069	0.157593	4.16847
ENSMUSG00000087635	predicted gene 13414 [Source:MGI Symbol;Acc:MGI:3652154]	Gm13414	processed_pseudogene	0.816373	3.24741e-05	4.48846	0.00126703	69	48	42	0	0	0	28.2501	0.196462	4.15538
ENSMUSG00000063015	cyclin I [Source:MGI Symbol;Acc:MGI:1341077]	Ccni	protein_coding	0.780195	3.25744e-05	4.48712	0.00126793	298	384	312	191	174	206	261.536	0.187787	4.15468
ENSMUSG00000024927	v-rel reticuloendotheliosis viral oncogene homolog A (avian) [Source:MGI Symbol;Acc:MGI:103290]	Rela	protein_coding	0.354607	3.32315e-05	4.47845	0.00129044	2217	2615	2331	1972	2251	2089	2223.98	0.0854452	4.15011
ENSMUSG00000066030	oogenesin 2 [Source:MGI Symbol;Acc:MGI:2684035]	Oog2	protein_coding	0.370188	3.33866e-05	4.47643	0.0012934	5215	6673	4989	4547	5381	4717	5190.07	0.0892224	4.14904
ENSMUSG00000038525	armadillo repeat containing 10 [Source:MGI Symbol;Acc:MGI:1914461]	Armc10	protein_coding	0.475346	3.37635e-05	4.47155	0.00130491	1668	1812	1763	1392	1514	1296	1567.04	0.114639	4.14647
ENSMUSG00000008683	ribosomal protein S15A [Source:MGI Symbol;Acc:MGI:2389091]	Rps15a	protein_coding	0.967368	3.41706e-05	4.46635	0.00131754	261	164	180	83	59	69	140.752	0.233453	4.14373
ENSMUSG00000060860	ubiquitin-conjugating enzyme E2S [Source:MGI Symbol;Acc:MGI:1925141]	Ube2s	protein_coding	0.667959	3.43812e-05	4.46368	0.00132254	439	591	469	318	321	351	413.606	0.161252	4.14232
ENSMUSG00000036299	cDNA sequence BC031181 [Source:MGI Symbol;Acc:MGI:3039614]	BC031181	protein_coding	0.492589	3.60948e-05	4.44256	0.00138521	1641	2401	1745	1480	1605	1432	1699.13	0.119238	4.13115
ENSMUSG00000005510	NADH:ubiquinone oxidoreductase core subunit S3 [Source:MGI Symbol;Acc:MGI:1915599]	Ndufs3	protein_coding	0.717782	3.66064e-05	4.43644	0.00140156	362	423	372	249	261	215	314.1	0.173885	4.12792
ENSMUSG00000096795	zinc finger protein 433 [Source:MGI Symbol;Acc:MGI:1920860]	Zfp433	protein_coding	0.91524	3.73131e-05	4.42814	0.00142529	76	60	53	9	4	11	37.2077	0.221956	4.12352
ENSMUSG00000075054	Yae1 domain containing 1 [Source:MGI Symbol;Acc:MGI:1914258]	Yae1d1	protein_coding	0.965963	4.08344e-05	4.38897	0.00155617	150	136	89	45	35	36	83.9334	0.235445	4.10271
ENSMUSG00000082045	predicted gene 11585 [Source:MGI Symbol;Acc:MGI:3651395]	Gm11585	processed_pseudogene	0.848993	4.36804e-05	4.35971	0.00166077	39	38	35	2	2	2	20.6281	0.207725	4.0871
ENSMUSG00000094635	predicted gene 7104 [Source:MGI Symbol;Acc:MGI:3779672]	Gm7104	processed_pseudogene	0.812307	4.53289e-05	4.34363	0.00171945	288	453	322	205	212	156	272.196	0.199168	4.07849
ENSMUSG00000114295	predicted gene 2534 [Source:MGI Symbol;Acc:MGI:3780702]	Gm2534	processed_pseudogene	0.867966	4.58458e-05	4.3387	0.00173505	66	45	58	4	2	8	32.2931	0.212953	4.07585
ENSMUSG00000021692	DIM1 dimethyladenosine transferase 1-like (S. cerevisiae) [Source:MGI Symbol;Acc:MGI:1913504]	Dimt1	protein_coding	0.950177	4.69507e-05	4.32836	0.00177277	149	130	155	55	64	36	100.566	0.233441	4.07031
ENSMUSG00000087701	predicted gene 13493 [Source:MGI Symbol;Acc:MGI:3650824]	Gm13493	processed_pseudogene	0.799376	4.71944e-05	4.32611	0.00177787	69	36	45	1	0	0	27.0857	0.19645	4.0691
ENSMUSG00000030873	sodium channel, nonvoltage-gated 1 beta [Source:MGI Symbol;Acc:MGI:104696]	Scnn1b	protein_coding	0.918159	4.85363e-05	4.31393	0.00182423	279	293	210	106	80	140	187.551	0.226005	4.06257
ENSMUSG00000024294	mindbomb E3 ubiquitin protein ligase 1 [Source:MGI Symbol;Acc:MGI:2443157]	Mib1	protein_coding	0.915856	5.0425e-05	4.29735	0.00188656	446	300	439	164	129	212	289.69	0.225934	4.05365
ENSMUSG00000008348	ubiquitin C [Source:MGI Symbol;Acc:MGI:98889]	Ubc	protein_coding	0.432301	5.03176e-05	4.29828	0.00188656	5522	7139	5704	4432	6138	4649	5530.08	0.106632	4.05415
ENSMUSG00000111272	predicted gene 7787 [Source:MGI Symbol;Acc:MGI:3648685]	Gm7787	processed_pseudogene	0.458192	5.07355e-05	4.29469	0.00189386	1081	1309	1172	900	1080	908	1066.32	0.113072	4.05221
ENSMUSG00000035356	nuclear factor of kappa light polypeptide gene enhancer in B cells inhibitor, zeta [Source:MGI Symbol;Acc:MGI:1931595]	Nfkbiz	protein_coding	-0.625344	5.2153e-05	4.28272	0.00194234	898	934	767	1428	2052	1402	1202.54	0.154568	-4.04576
ENSMUSG00000022899	solute carrier family 15 (H+/peptide transporter), member 2 [Source:MGI Symbol;Acc:MGI:1890457]	Slc15a2	protein_coding	-0.774265	5.37482e-05	4.26964	0.00199722	297	413	487	781	1145	772	621.716	0.191711	-4.0387
ENSMUSG00000066629	ribosomal protein L36, pseudogene 3 [Source:MGI Symbol;Acc:MGI:3642480]	Rpl36-ps3	processed_pseudogene	0.792233	5.47922e-05	4.26128	0.0020314	43	46	37	1	0	0	22.239	0.19638	4.03418
ENSMUSG00000030417	programmed cell death 5 [Source:MGI Symbol;Acc:MGI:1913538]	Pdcd5	protein_coding	0.701439	5.69451e-05	4.24454	0.00210645	338	435	348	245	240	223	304.618	0.174265	4.02512
ENSMUSG00000013878	ring finger protein 170 [Source:MGI Symbol;Acc:MGI:1924983]	Rnf170	protein_coding	0.85689	5.73169e-05	4.24172	0.00211543	832	699	439	267	334	381	498.113	0.212966	4.02359
ENSMUSG00000115700	predicted gene 7517 [Source:MGI Symbol;Acc:MGI:3643004]	Gm7517	processed_pseudogene	0.9377	5.80584e-05	4.23613	0.00213798	91	123	110	43	40	33	74.3825	0.233226	4.02057
ENSMUSG00000038374	RNA binding motif protein 8a [Source:MGI Symbol;Acc:MGI:1913129]	Rbm8a	protein_coding	0.759445	6.16338e-05	4.21018	0.00226456	700	1132	1039	446	762	481	755.512	0.189555	4.00647
ENSMUSG00000094441	zinc finger protein 955A [Source:MGI Symbol;Acc:MGI:4834570]	Zfp955a	protein_coding	0.775884	6.45053e-05	4.1904	0.00236476	364	410	441	253	201	238	320.557	0.19418	3.99569
ENSMUSG00000047746	F-box protein 40 [Source:MGI Symbol;Acc:MGI:2443753]	Fbxo40	protein_coding	-0.462664	6.69097e-05	4.17451	0.00244743	1963	1996	1953	2770	3339	3413	2503.31	0.116043	-3.98702
ENSMUSG00000083280	predicted gene 11838 [Source:MGI Symbol;Acc:MGI:3650938]	Gm11838	processed_pseudogene	0.813575	6.97306e-05	4.15658	0.00254493	186	255	196	98	121	120	162.826	0.20456	3.9772
ENSMUSG00000110685	predicted gene 5373 [Source:MGI Symbol;Acc:MGI:3779485]	Gm5373	transcribed_unprocessed_pseudogene	0.926603	7.7971e-05	4.10807	0.00283936	246	186	126	76	57	62	129.022	0.23455	3.95055
ENSMUSG00000078497	zinc finger protein 978 [Source:MGI Symbol;Acc:MGI:3701123]	Zfp978	protein_coding	0.900518	8.20917e-05	4.0857	0.00298279	141	129	144	57	53	62	99.6763	0.228662	3.93821
ENSMUSG00000029430	RAN, member RAS oncogene family [Source:MGI Symbol;Acc:MGI:1333112]	Ran	protein_coding	0.719366	8.28439e-05	4.08174	0.00300346	329	365	299	174	224	216	268.073	0.182765	3.93602
ENSMUSG00000053830	predicted pseudogene 9923 [Source:MGI Symbol;Acc:MGI:3704365]	Gm9923	processed_pseudogene	0.864729	9.05408e-05	4.04316	0.00327526	130	220	158	72	83	79	123.718	0.220896	3.91464
ENSMUSG00000110896	predicted gene, 48273 [Source:MGI Symbol;Acc:MGI:6097698]	Gm48273	TEC	0.820439	9.5512e-05	4.01994	0.00344748	40	62	56	8	2	3	29.505	0.210276	3.90172
ENSMUSG00000107092	predicted gene 7993 [Source:MGI Symbol;Acc:MGI:3647399]	Gm7993	processed_pseudogene	0.83434	9.85357e-05	4.00641	0.0035488	148	222	187	87	91	99	139.429	0.214254	3.89417
ENSMUSG00000048416	myeloid leukemia factor 1 [Source:MGI Symbol;Acc:MGI:1341819]	Mlf1	protein_coding	-0.882482	0.000100114	3.99951	0.00358985	29	18	10	140	200	71	72.8722	0.226841	-3.89032
ENSMUSG00000031715	SWI/SNF related, matrix associated, actin dependent regulator of chromatin, subfamily a, member 5 [Source:MGI Symbol;Acc:MGI:1935129]	Smarca5	protein_coding	0.571665	0.000100055	3.99976	0.00358985	1761	2078	2505	1426	1590	1619	1827.28	0.14694	3.89046
ENSMUSG00000090211	predicted gene 16050 [Source:MGI Symbol;Acc:MGI:3801837]	Gm16050	lincRNA	0.878949	0.000112799	3.94769	0.00403591	133	146	125	65	57	51	97.5415	0.227632	3.86127
ENSMUSG00000111194	predicted gene, 47180 [Source:MGI Symbol;Acc:MGI:6095967]	Gm47180	transcribed_unprocessed_pseudogene	-0.472324	0.00011312	3.94646	0.00403856	1718	1654	1481	2485	2745	2659	2068.63	0.122345	-3.86058
ENSMUSG00000081929	ribosomal protein S11, pseudogene 2 [Source:MGI Symbol;Acc:MGI:3651796]	Rps11-ps2	processed_pseudogene	0.909972	0.000113453	3.94518	0.00404164	106	121	114	49	33	24	76.2373	0.235753	3.85986
ENSMUSG00000018583	GTPase activating protein (SH3 domain) binding protein 1 [Source:MGI Symbol;Acc:MGI:1351465]	G3bp1	protein_coding	0.528836	0.000114423	3.94149	0.00406735	614	758	668	452	565	531	594.041	0.137083	3.85778
ENSMUSG00000096544	predicted pseudogene 4617 [Source:MGI Symbol;Acc:MGI:3704225]	Gm4617	processed_pseudogene	0.893594	0.000115263	3.93831	0.00408833	121	232	171	59	94	53	121.638	0.231742	3.85599
ENSMUSG00000015747	vacuolar protein sorting 45 [Source:MGI Symbol;Acc:MGI:891965]	Vps45	protein_coding	-0.703049	0.000121119	3.91679	0.00428679	318	366	264	494	749	723	466.42	0.182902	-3.84385
ENSMUSG00000080921	ribosomal protein L38, pseudogene 2 [Source:MGI Symbol;Acc:MGI:3646625]	Rpl38-ps2	processed_pseudogene	0.822481	0.000124405	3.90516	0.00439357	144	195	159	83	86	82	125.371	0.21434	3.83728
ENSMUSG00000101337	dynein, axonemal, heavy chain 7C [Source:MGI Symbol;Acc:MGI:3639762]	Dnah7c	protein_coding	0.497097	0.00013047	3.88449	0.00459789	1056	1126	1124	861	869	854	979.227	0.129941	3.82557
ENSMUSG00000092230	predicted gene, 18889 [Source:MGI Symbol;Acc:MGI:5011074]	Gm18889	processed_pseudogene	0.806588	0.000135695	3.86744	0.00477174	227	221	178	103	122	104	160.562	0.211376	3.81589
ENSMUSG00000031007	ATPase, H+ transporting, lysosomal accessory protein 2 [Source:MGI Symbol;Acc:MGI:1917745]	Atp6ap2	protein_coding	0.444807	0.000136025	3.86638	0.00477311	963	1216	1118	830	945	915	989.744	0.116585	3.81529
ENSMUSG00000080896	predicted gene 14567 [Source:MGI Symbol;Acc:MGI:3705732]	Gm14567	processed_pseudogene	0.848958	0.000141274	3.84994	0.00494671	393	338	317	208	121	157	260.952	0.223062	3.80593
ENSMUSG00000061897	predicted gene 14292 [Source:MGI Symbol;Acc:MGI:3649964]	Gm14292	processed_pseudogene	0.89362	0.000142543	3.84605	0.00498051	56	101	76	16	24	25	50.149	0.234934	3.80371
ENSMUSG00000073079	signal recognition particle 54A [Source:MGI Symbol;Acc:MGI:1346087]	Srp54a	protein_coding	0.731145	0.000143959	3.84176	0.00501927	257	343	364	181	211	184	256.998	0.192343	3.80127
ENSMUSG00000006057	ATP synthase, H+ transporting, mitochondrial F0 complex, subunit C1 (subunit 9) [Source:MGI Symbol;Acc:MGI:107653]	Atp5g1	protein_coding	0.760616	0.000146182	3.83511	0.00508595	224	320	267	155	138	164	211.695	0.200296	3.79747
ENSMUSG00000055760	gem nuclear organelle associated protein 6 [Source:MGI Symbol;Acc:MGI:1914492]	Gemin6	protein_coding	0.589008	0.000147006	3.83266	0.0051038	609	881	745	524	603	459	632.314	0.155163	3.79607
ENSMUSG00000042167	terminal nucleotidyltransferase 2 [Source:MGI Symbol;Acc:MGI:2140950]	Tent2	protein_coding	0.699562	0.000148614	3.82794	0.00514869	491	528	522	372	300	288	419.359	0.184417	3.79337
ENSMUSG00000048222	microfibrillar-associated protein 1B [Source:MGI Symbol;Acc:MGI:3694697]	Mfap1b	protein_coding	0.580423	0.00015356	3.81372	0.00530883	1180	1289	1019	664	1021	842	996.923	0.153338	3.78524
ENSMUSG00000029394	CDK2 (cyclin-dependent kinase 2)-associated protein 1 [Source:MGI Symbol;Acc:MGI:1202069]	Cdk2ap1	protein_coding	0.80061	0.000154967	3.80976	0.00534621	33	43	66	3	8	4	27.2141	0.211635	3.78297
ENSMUSG00000046836	BRO1 domain and CAAX motif containing [Source:MGI Symbol;Acc:MGI:1918928]	Brox	protein_coding	0.584967	0.000164629	3.78349	0.00566758	1086	1511	1636	959	994	1064	1204.35	0.15525	3.7679
ENSMUSG00000037017	zinc finger and SCAN domain containing 21 [Source:MGI Symbol;Acc:MGI:99182]	Zscan21	protein_coding	-0.435037	0.000174026	3.75938	0.00597855	1503	2303	1749	2800	2987	2839	2291.79	0.115886	-3.75401
ENSMUSG00000114167	predicted gene 7002 [Source:MGI Symbol;Acc:MGI:3779646]	Gm7002	processed_pseudogene	0.867509	0.000178263	3.74894	0.00611127	123	113	142	43	58	56	90.8755	0.23146	3.74798
ENSMUSG00000059195	predicted gene 12715 [Source:MGI Symbol;Acc:MGI:3650759]	Gm12715	processed_pseudogene	0.847968	0.000180182	3.74429	0.00616418	149	145	146	55	85	61	108.173	0.226409	3.74529
ENSMUSG00000056836	predicted pseudogene 6851 [Source:MGI Symbol;Acc:MGI:3643618]	Gm6851	processed_pseudogene	0.879865	0.00018565	3.73131	0.0063117	92	237	237	56	79	62	127.591	0.235397	3.73778
ENSMUSG00000048007	translocase of inner mitochondrial membrane 8A1 [Source:MGI Symbol;Acc:MGI:1353433]	Timm8a1	protein_coding	0.729899	0.000185644	3.73132	0.0063117	41	49	33	0	3	1	22.0232	0.195276	3.73779
ENSMUSG00000021395	spindlin 1 [Source:MGI Symbol;Acc:MGI:109242]	Spin1	protein_coding	0.294886	0.00018555	3.73154	0.0063117	74998	86806	86918	72196	81621	75614	78890.4	0.0788904	3.73792
ENSMUSG00000024982	zinc finger, DHHC domain containing 6 [Source:MGI Symbol;Acc:MGI:1914230]	Zdhhc6	protein_coding	0.623337	0.000187586	3.7268	0.00636433	895	959	673	482	667	589	708.459	0.166883	3.73517
ENSMUSG00000041453	ribosomal protein L21 [Source:MGI Symbol;Acc:MGI:1278340]	Rpl21	protein_coding	0.878926	0.000188482	3.72473	0.00638152	138	107	116	43	22	44	81.0577	0.235386	3.73397
ENSMUSG00000113838	predicted gene 46994 [Source:MGI Symbol;Acc:MGI:5908117]	Gm46994	processed_pseudogene	0.714868	0.000189365	3.7227	0.00639821	61	35	27	0	1	1	22.2794	0.19151	3.7328
ENSMUSG00000001630	serine/threonine kinase 38 like [Source:MGI Symbol;Acc:MGI:1922250]	Stk38l	protein_coding	0.606581	0.000192336	3.71594	0.00648522	702	812	889	530	525	621	680.292	0.162671	3.72888
ENSMUSG00000094615	predicted gene 4899 [Source:MGI Symbol;Acc:MGI:3644090]	Gm4899	processed_pseudogene	0.74463	0.000200958	3.6969	0.006762	198	277	209	132	135	125	179.267	0.200287	3.71781
ENSMUSG00000066613	zinc finger protein 932 [Source:MGI Symbol;Acc:MGI:1916754]	Zfp932	protein_coding	0.697333	0.000218824	3.6599	0.00734811	535	659	529	362	283	414	464.926	0.188661	3.69623
ENSMUSG00000103958	predicted gene 8023 [Source:MGI Symbol;Acc:MGI:3647988]	Gm8023	processed_pseudogene	0.786337	0.000219607	3.65835	0.0073565	36	51	47	2	7	7	25.7512	0.212792	3.69532
ENSMUSG00000032399	ribosomal protein L4 [Source:MGI Symbol;Acc:MGI:1915141]	Rpl4	protein_coding	0.409311	0.000219972	3.65763	0.0073565	1692	2202	1919	1542	1869	1471	1763.48	0.110777	3.6949
ENSMUSG00000091896	ubiquitin-conjugating enzyme E2D 2A [Source:MGI Symbol;Acc:MGI:1930715]	Ube2d2a	protein_coding	0.39932	0.000222134	3.65338	0.00741367	1541	1996	1734	1285	1644	1537	1604.8	0.108146	3.69242
ENSMUSG00000021134	serine/arginine-rich splicing factor 5 [Source:MGI Symbol;Acc:MGI:98287]	Srsf5	protein_coding	0.757494	0.000225269	3.6473	0.007503	769	706	570	307	553	309	537.759	0.205347	3.68885
ENSMUSG00000019817	pleiomorphic adenoma gene-like 1 [Source:MGI Symbol;Acc:MGI:1100874]	Plagl1	protein_coding	-0.658766	0.000228963	3.64023	0.00761058	262	375	267	628	650	492	429.6	0.178784	-3.68471
ENSMUSG00000001847	Rac family small GTPase 1 [Source:MGI Symbol;Acc:MGI:97845]	Rac1	protein_coding	0.396724	0.000230211	3.63787	0.00763658	3416	4887	3875	3089	4020	3201	3696.62	0.107708	3.68333
ENSMUSG00000078452	retinoic acid early transcript delta [Source:MGI Symbol;Acc:MGI:1861032]	Raet1d	protein_coding	0.789545	0.000234653	3.62957	0.00776821	231	198	209	99	114	124	164.65	0.21464	3.67845
ENSMUSG00000011831	ecotropic viral integration site 5 [Source:MGI Symbol;Acc:MGI:104736]	Evi5	protein_coding	0.460645	0.000238373	3.62274	0.00787544	3305	3422	2879	2271	3126	2388	2877.73	0.125365	3.67444
ENSMUSG00000078134	predicted gene 12355 [Source:MGI Symbol;Acc:MGI:3649769]	Gm12355	protein_coding	0.843232	0.000244289	3.6121	0.00805465	45	95	50	13	14	16	39.0814	0.229878	3.66817
ENSMUSG00000082253	predicted gene 14639 [Source:MGI Symbol;Acc:MGI:3641909]	Gm14639	processed_pseudogene	0.860016	0.000245396	3.61013	0.00807489	63	76	98	27	19	22	52.1896	0.234527	3.66702
ENSMUSG00000015023	DEAD (Asp-Glu-Ala-Asp) box polypeptide 19a [Source:MGI Symbol;Acc:MGI:99526]	Ddx19a	protein_coding	0.569621	0.000253959	3.59524	0.00833994	1700	1931	1873	962	1585	1473	1578.74	0.155709	3.65823
ENSMUSG00000039985	SIN3-HDAC complex associated factor [Source:MGI Symbol;Acc:MGI:1929091]	Sinhcaf	protein_coding	0.803002	0.000263317	3.57952	0.00862995	162	210	173	69	93	110	136.733	0.220064	3.64895
ENSMUSG00000062518	zinc finger protein 534 [Source:MGI Symbol;Acc:MGI:3650650]	Zfp534	protein_coding	0.849737	0.000272375	3.56483	0.00890901	247	269	168	105	57	108	161.664	0.233428	3.64025
ENSMUSG00000071172	serine/arginine-rich splicing factor 3 [Source:MGI Symbol;Acc:MGI:98285]	Srsf3	protein_coding	0.592134	0.000277496	3.55674	0.00905843	758	1197	982	724	624	695	825.407	0.162878	3.63545
ENSMUSG00000079418	autophagy related 4A, cysteine peptidase [Source:MGI Symbol;Acc:MGI:2147903]	Atg4a	protein_coding	0.771356	0.000280004	3.55284	0.00912212	92	126	32	4	11	16	47.7114	0.212312	3.63313
ENSMUSG00000060204	predicted gene 5868 [Source:MGI Symbol;Acc:MGI:3645333]	Gm5868	protein_coding	0.733729	0.000283745	3.54707	0.00922564	247	456	316	191	189	201	265.144	0.202146	3.62971
ENSMUSG00000072574	predicted gene 17184 [Source:MGI Symbol;Acc:MGI:4938011]	Gm17184	transcribed_unprocessed_pseudogene	0.819228	0.0002929	3.53328	0.00950445	51	45	52	10	13	8	30.911	0.226212	3.6215
ENSMUSG00000021461	Fanconi anemia, complementation group C [Source:MGI Symbol;Acc:MGI:95480]	Fancc	protein_coding	-0.352998	0.000298111	3.52562	0.00965445	2021	2510	1905	3017	3252	3140	2571.51	0.0975958	-3.61694
ENSMUSG00000082336	predicted gene 8401 [Source:MGI Symbol;Acc:MGI:3644368]	Gm8401	processed_pseudogene	0.7793	0.000301379	3.52089	0.00972184	47	36	60	5	11	5	28.6197	0.215627	3.61411
ENSMUSG00000079553	kinesin family member C1 [Source:MGI Symbol;Acc:MGI:109596]	Kifc1	protein_coding	0.769811	0.000301284	3.52102	0.00972184	219	414	295	161	199	133	235.408	0.212997	3.61419
ENSMUSG00000020359	5-phosphohydroxy-L-lysine phospholyase [Source:MGI Symbol;Acc:MGI:1920197]	Phykpl	protein_coding	-0.8152	0.000317178	3.4987	0.0102114	78	170	176	329	498	338	251.253	0.226391	-3.60085
ENSMUSG00000093651	predicted gene 5873 [Source:MGI Symbol;Acc:MGI:3648385]	Gm5873	processed_pseudogene	0.687648	0.000322327	3.4917	0.0103437	35	30	40	0	2	1	19.0395	0.191191	3.59666
ENSMUSG00000035273	heparanase [Source:MGI Symbol;Acc:MGI:1343124]	Hpse	protein_coding	-0.592382	0.000322722	3.49117	0.0103437	600	519	521	1000	1137	901	756.999	0.164718	-3.59634
ENSMUSG00000060904	ADP-ribosylation factor-like 1 [Source:MGI Symbol;Acc:MGI:99436]	Arl1	protein_coding	0.480208	0.000323182	3.49055	0.0103437	1044	1102	916	756	827	836	909.47	0.133541	3.59597
ENSMUSG00000000563	ATP synthase, H+ transporting, mitochondrial F0 complex, subunit B1 [Source:MGI Symbol;Acc:MGI:1100495]	Atp5f1	protein_coding	0.612472	0.00032836	3.48365	0.010489	922	914	952	689	549	677	787.794	0.170518	3.59183
ENSMUSG00000090266	methyltransferase like 23 [Source:MGI Symbol;Acc:MGI:1921569]	Mettl23	protein_coding	0.757921	0.000330164	3.48127	0.0105261	181	244	231	133	113	111	169.693	0.211096	3.59041
ENSMUSG00000071415	ribosomal protein L23 [Source:MGI Symbol;Acc:MGI:1929455]	Rpl23	protein_coding	0.818889	0.00033637	3.47318	0.0106995	188	156	158	83	89	59	124.357	0.228386	3.58555
ENSMUSG00000050732	vesicle-associated membrane protein 8 [Source:MGI Symbol;Acc:MGI:1336882]	Vamp8	protein_coding	-0.475254	0.000336909	3.47249	0.0106995	967	1516	1117	1895	2146	1771	1517.28	0.132562	-3.58513
ENSMUSG00000025362	ribosomal protein S26 [Source:MGI Symbol;Acc:MGI:1351628]	Rps26	protein_coding	0.794903	0.000343191	3.46446	0.0108779	153	218	195	81	125	76	141.536	0.222021	3.58031
ENSMUSG00000107035	Y box protein 1, pseudogene 2 [Source:MGI Symbol;Acc:MGI:2137671]	Ybx1-ps2	processed_pseudogene	0.831695	0.000344761	3.46248	0.0109066	102	129	89	38	47	49	76.2817	0.232375	3.57911
ENSMUSG00000084383	predicted gene 13370 [Source:MGI Symbol;Acc:MGI:3651012]	Gm13370	processed_pseudogene	0.751612	0.000348298	3.45805	0.0109972	37	46	28	4	6	3	21.2849	0.210156	3.57645
ENSMUSG00000001403	ubiquitin-conjugating enzyme E2C [Source:MGI Symbol;Acc:MGI:1915862]	Ube2c	protein_coding	0.463125	0.000367393	3.43487	0.0115778	2879	3103	2536	2079	2789	1994	2543.55	0.130001	3.56246
ENSMUSG00000100153	protein phosphatase 1 catalytic subunit gamma B [Source:MGI Symbol;Acc:MGI:3647492]	Ppp1ccb	transcribed_processed_pseudogene	0.769512	0.000383603	3.41612	0.0120655	278	310	256	170	111	160	216.402	0.216696	3.55111
ENSMUSG00000027333	spermine oxidase [Source:MGI Symbol;Acc:MGI:2445356]	Smox	protein_coding	-0.450121	0.000396594	3.40165	0.0124502	1584	2367	1562	2671	3280	2768	2293.25	0.127069	-3.54234
ENSMUSG00000102591	predicted gene, 38383 [Source:MGI Symbol;Acc:MGI:5611611]	Gm38383	TEC	0.782337	0.000404744	3.39282	0.0126817	348	246	279	168	131	147	224.459	0.221189	3.53697
ENSMUSG00000048164	predicted pseudogene 7204 [Source:MGI Symbol;Acc:MGI:3645884]	Gm7204	processed_pseudogene	0.737741	0.000412719	3.38435	0.0129048	288	349	302	185	136	204	245.605	0.208884	3.53181
ENSMUSG00000047866	lon peptidase 2, peroxisomal [Source:MGI Symbol;Acc:MGI:1914137]	Lonp2	protein_coding	-0.373431	0.000413437	3.38359	0.0129048	1564	1831	1684	2440	2476	2655	2056.99	0.105747	-3.53135
ENSMUSG00000020719	DEAD (Asp-Glu-Ala-Asp) box polypeptide 5 [Source:MGI Symbol;Acc:MGI:105037]	Ddx5	protein_coding	0.379367	0.000424819	3.3718	0.0132348	1398	1653	1588	1214	1478	1308	1426.55	0.107647	3.52417
ENSMUSG00000046934	citrate synthase like [Source:MGI Symbol;Acc:MGI:1919082]	Csl	protein_coding	0.396796	0.000434227	3.36228	0.0135022	1080	1445	1190	951	1167	1024	1129.48	0.112779	3.51836
ENSMUSG00000066477	predicted gene 16551 [Source:MGI Symbol;Acc:MGI:4414971]	Gm16551	processed_transcript	-0.42323	0.000446601	3.35008	0.0138607	997	1327	973	1524	1953	1646	1359.43	0.120548	-3.51089
ENSMUSG00000022956	ATP synthase, H+ transporting, mitochondrial F1 complex, O subunit [Source:MGI Symbol;Acc:MGI:106341]	Atp5o	protein_coding	0.526494	0.000452235	3.34464	0.014009	450	567	519	371	397	385	445.907	0.150103	3.50756
ENSMUSG00000064193	predicted gene 4735 [Source:MGI Symbol;Acc:MGI:3645521]	Gm4735	processed_pseudogene	0.787954	0.000456837	3.34024	0.0141249	51	44	47	12	10	8	29.7468	0.224817	3.50487
ENSMUSG00000031167	RNA binding motif (RNP1, RRM) protein 3 [Source:MGI Symbol;Acc:MGI:1099460]	Rbm3	protein_coding	0.772823	0.000464275	3.33322	0.0142473	38	50	60	12	6	9	30.1387	0.220771	3.50056
ENSMUSG00000067058	ribosomal protein S15A, pseudogene 5 [Source:MGI Symbol;Acc:MGI:3642245]	Rps15a-ps5	processed_pseudogene	0.669115	0.000463518	3.33393	0.0142473	48	43	44	4	0	1	24.6397	0.191121	3.501
ENSMUSG00000108823	predicted gene, 18959 [Source:MGI Symbol;Acc:MGI:5011144]	Gm18959	processed_pseudogene	0.638829	0.000461861	3.33549	0.0142473	39	37	36	0	0	0	19.7272	0.182421	3.50195
ENSMUSG00000035439	4HAUS augmin-like complex, subunit 8 [Source:MGI Symbol;Acc:MGI:1923728]	Haus8	protein_coding	-0.371824	0.000464049	3.33344	0.0142473	2179	2374	1980	3022	3713	3047	2646.61	0.106214	-3.50069
ENSMUSG00000110186	predicted pseudogene 7789 [Source:MGI Symbol;Acc:MGI:3648689]	Gm7789	transcribed_unprocessed_pseudogene	0.784689	0.000480322	3.31847	0.0147122	93	83	37	17	11	17	44.3891	0.224743	3.4915
ENSMUSG00000018974	squamous cell carcinoma antigen recognized by T cells 3 [Source:MGI Symbol;Acc:MGI:1858230]	Sart3	protein_coding	-0.284201	0.000482227	3.31675	0.014743	5987	7257	5603	8110	9419	8668	7317.6	0.0814227	-3.49044
ENSMUSG00000071644	eukaryotic translation elongation factor 1 gamma [Source:MGI Symbol;Acc:MGI:1914410]	Eef1g	protein_coding	0.780407	0.000485115	3.31416	0.0148037	49	77	59	16	6	15	37.8543	0.223687	3.48884
ENSMUSG00000003429	ribosomal protein S11 [Source:MGI Symbol;Acc:MGI:1351329]	Rps11	protein_coding	0.648777	0.000487255	3.31224	0.0148414	844	626	781	486	531	470	629	0.18602	3.48767
ENSMUSG00000094017	predicted gene 13160 [Source:MGI Symbol;Acc:MGI:3649984]	Gm13160	processed_pseudogene	0.657595	0.000490512	3.30935	0.0149128	272	315	281	195	198	164	237.785	0.188645	3.48588
ENSMUSG00000107853	predicted gene, 18584 [Source:MGI Symbol;Acc:MGI:5010769]	Gm18584	processed_pseudogene	0.541743	0.000492209	3.30785	0.0149367	540	803	621	488	473	477	562.749	0.155452	3.48496
ENSMUSG00000028044	CDC28 protein kinase 1b [Source:MGI Symbol;Acc:MGI:1889208]	Cks1b	protein_coding	0.456054	0.000498818	3.30206	0.0151093	2264	2820	2447	2206	2122	1702	2245.72	0.130998	3.48139
ENSMUSG00000048758	ribosomal protein L29 [Source:MGI Symbol;Acc:MGI:99687]	Rpl29	protein_coding	0.819675	0.000505468	3.29631	0.0152825	80	141	68	36	33	29	64.7116	0.235685	3.47784
ENSMUSG00000024217	U1 small nuclear ribonucleoprotein C [Source:MGI Symbol;Acc:MGI:109489]	Snrpc	protein_coding	0.78984	0.000506839	3.29513	0.0152957	128	171	154	64	96	57	112.108	0.227154	3.47712
ENSMUSG00000043635	a disintegrin-like and metallopeptidase (reprolysin type) with thrombospondin type 1 motif, 3 [Source:MGI Symbol;Acc:MGI:3045353]	Adamts3	protein_coding	-0.74799	0.000512108	3.29064	0.015398	304	377	198	599	976	520	471.839	0.21529	-3.47434
ENSMUSG00000095159	tubulin, beta 4B class IVB, pseudogene 1 [Source:MGI Symbol;Acc:MGI:3642800]	Tubb4b-ps1	processed_pseudogene	0.364635	0.000511587	3.29108	0.015398	2374	2739	2204	2115	2136	2099	2258.76	0.104943	3.47461
ENSMUSG00000114999	predicted gene 7962 [Source:MGI Symbol;Acc:MGI:3643213]	Gm7962	processed_pseudogene	0.692202	0.000516912	3.28658	0.015514	194	285	254	144	162	137	195.612	0.199376	3.47184
ENSMUSG00000027940	tropomyosin 3, gamma [Source:MGI Symbol;Acc:MGI:1890149]	Tpm3	protein_coding	0.66657	0.000519831	3.28414	0.0155731	335	484	382	233	322	204	324.706	0.192077	3.47032
ENSMUSG00000030079	RuvB-like protein 1 [Source:MGI Symbol;Acc:MGI:1928760]	Ruvbl1	protein_coding	0.799663	0.000523296	3.28125	0.0156483	73	100	89	35	13	19	56.1954	0.230547	3.46854
ENSMUSG00000111495	predicted gene 5366 [Source:MGI Symbol;Acc:MGI:3646412]	Gm5366	processed_pseudogene	0.759583	0.000528322	3.2771	0.0157698	171	310	233	114	109	146	180.183	0.219154	3.46597
ENSMUSG00000031467	1-acylglycerol-3-phosphate O-acyltransferase 5 (lysophosphatidic acid acyltransferase, epsilon) [Source:MGI Symbol;Acc:MGI:1196345]	Agpat5	protein_coding	-0.433477	0.00053211	3.274	0.015854	694	829	635	1060	1183	1144	898.096	0.125136	-3.46405
ENSMUSG00000053038	predicted pseudogene 6180 [Source:MGI Symbol;Acc:MGI:3643972]	Gm6180	processed_pseudogene	0.533678	0.000542414	3.26567	0.0161316	1689	2220	1725	1130	1858	1231	1624.13	0.154292	3.45889
ENSMUSG00000025825	iron-sulfur cluster assembly enzyme [Source:MGI Symbol;Acc:MGI:1913633]	Iscu	protein_coding	0.58645	0.00056283	3.24962	0.0167085	491	755	609	465	440	384	520.794	0.170039	3.44892
ENSMUSG00000059031	olfactory receptor 482 [Source:MGI Symbol;Acc:MGI:3030316]	Olfr482	protein_coding	0.70862	0.000567741	3.24585	0.0168238	41	38	29	4	6	2	20.8256	0.205601	3.44658
ENSMUSG00000028551	cyclin dependent kinase inhibitor 2C [Source:MGI Symbol;Acc:MGI:105388]	Cdkn2c	protein_coding	-0.812236	0.000569963	3.24415	0.0168592	83	37	54	149	293	214	131.134	0.235737	-3.44552
ENSMUSG00000098506	PHD finger protein 20, pseudogene [Source:MGI Symbol;Acc:MGI:5010233]	Phf20-ps	processed_pseudogene	0.441369	0.000576102	3.2395	0.0170101	986	1289	1023	832	1042	809	986.118	0.128207	3.44262
ENSMUSG00000048709	predicted gene 8666 [Source:MGI Symbol;Acc:MGI:3648747]	Gm8666	processed_pseudogene	0.769843	0.00059019	3.22901	0.0173947	146	170	141	76	94	60	115.178	0.224047	3.43608
ENSMUSG00000022257	lysosomal-associated protein transmembrane 4B [Source:MGI Symbol;Acc:MGI:1890494]	Laptm4b	protein_coding	0.269027	0.000593662	3.22646	0.0174656	11242	15569	12278	11260	13222	11996	12404.7	0.0783309	3.43449
ENSMUSG00000113583	predicted gene 10264 [Source:MGI Symbol;Acc:MGI:3646909]	Gm10264	unprocessed_pseudogene	0.628051	0.000606706	3.21702	0.0178174	26	44	30	1	0	0	17.4177	0.18318	3.4286
ENSMUSG00000022106	regulator of chromosome condensation (RCC1) and BTB (POZ) domain containing protein 2 [Source:MGI Symbol;Acc:MGI:1917200]	Rcbtb2	protein_coding	-0.6581	0.000619446	3.208	0.018159	149	243	184	358	457	344	277.428	0.192261	-3.42295
ENSMUSG00000031221	immunoglobulin (CD79A) binding protein 1 [Source:MGI Symbol;Acc:MGI:1346500]	Igbp1	protein_coding	-0.345748	0.000621268	3.20672	0.0181799	1461	2032	1613	2396	2593	2426	2029.88	0.101032	-3.42216
ENSMUSG00000023943	sulfotransferase family, cytosolic, 1C, member 1 [Source:MGI Symbol;Acc:MGI:102928]	Sult1c1	protein_coding	0.798719	0.000644498	3.19078	0.018826	215	156	131	82	57	72	121.874	0.23408	3.41216
ENSMUSG00000110150	predicted gene 8523 [Source:MGI Symbol;Acc:MGI:3779801]	Gm8523	processed_pseudogene	0.570524	0.000657044	3.18241	0.0191529	435	513	517	350	331	363	417.92	0.167461	3.4069
ENSMUSG00000003527	ess-2 splicing factor [Source:MGI Symbol;Acc:MGI:107854]	Ess2	protein_coding	-0.433913	0.000658026	3.18176	0.0191529	1309	1728	1793	2461	2573	2554	2013.74	0.127378	-3.4065
ENSMUSG00000030042	polymerase (DNA-directed), epsilon 4 (p12 subunit) [Source:MGI Symbol;Acc:MGI:1914229]	Pole4	protein_coding	0.331357	0.000684749	3.16447	0.0198954	5563	6895	5205	5269	5260	5159	5499.89	0.0975838	3.39561
ENSMUSG00000032482	chondroitin sulfate proteoglycan 5 [Source:MGI Symbol;Acc:MGI:1352747]	Cspg5	protein_coding	-0.799956	0.000690807	3.16064	0.0200359	26	65	44	186	118	154	94.4432	0.235753	-3.3932
ENSMUSG00000058443	ribosomal protein L10, pseudogene 3 [Source:MGI Symbol;Acc:MGI:3704336]	Rpl10-ps3	protein_coding	0.639173	0.000706471	3.15091	0.0204539	25	30	24	1	1	1	14.2557	0.18871	3.38706
ENSMUSG00000029729	zinc finger with KRAB and SCAN domains 1 [Source:MGI Symbol;Acc:MGI:1921820]	Zkscan1	protein_coding	-0.714708	0.000723467	3.14058	0.0209091	245	265	427	653	889	605	494.149	0.211419	-3.38053
ENSMUSG00000082718	predicted gene 14928 [Source:MGI Symbol;Acc:MGI:3648477]	Gm14928	processed_pseudogene	0.615051	0.000726672	3.13866	0.0209647	26	40	30	1	0	0	16.7938	0.182005	3.37931
ENSMUSG00000072692	ribosomal protein L37, retrotransposed [Source:MGI Symbol;Acc:MGI:3651519]	Rpl37rt	transcribed_processed_pseudogene	0.452787	0.000728401	3.13763	0.0209777	6554	6368	5413	4609	6030	4261	5507.21	0.134014	3.37866
ENSMUSG00000034908	SID1 transmembrane family, member 2 [Source:MGI Symbol;Acc:MGI:2446134]	Sidt2	protein_coding	-0.416394	0.000738116	3.13188	0.0212202	1086	1268	957	1532	1963	1650	1367.67	0.123375	-3.37502
ENSMUSG00000106664	predicted gene, 17936 [Source:MGI Symbol;Acc:MGI:5010121]	Gm17936	processed_pseudogene	0.494789	0.000740637	3.13039	0.0212554	708	951	886	604	775	590	745.814	0.146644	3.37408
ENSMUSG00000112550	predicted gene 6627 [Source:MGI Symbol;Acc:MGI:3644486]	Gm6627	processed_pseudogene	0.600861	0.000745774	3.12739	0.0213654	337	444	414	230	331	262	334.447	0.178182	3.37217
ENSMUSG00000024725	osteoclast stimulating factor 1 [Source:MGI Symbol;Acc:MGI:700012]	Ostf1	protein_coding	-0.413031	0.000753563	3.12288	0.0215508	823	1047	857	1421	1519	1264	1123.03	0.122586	-3.36931
ENSMUSG00000045010	predicted gene 4779 [Source:MGI Symbol;Acc:MGI:3646776]	Gm4779	protein_coding	-0.701002	0.000757348	3.1207	0.0216214	198	170	167	379	504	312	277.536	0.20814	-3.36793
ENSMUSG00000023072	centrosomal protein 89 [Source:MGI Symbol;Acc:MGI:1919390]	Cep89	protein_coding	-0.48945	0.000770063	3.11347	0.0219461	569	657	510	802	1096	994	746.675	0.145525	-3.36334
ENSMUSG00000031059	NADH:ubiquinone oxidoreductase subunit B11 [Source:MGI Symbol;Acc:MGI:1349919]	Ndufb11	protein_coding	0.572863	0.000773317	3.11164	0.0220006	1765	1460	1265	1135	1056	1018	1289.34	0.170385	3.36217
ENSMUSG00000022285	tyrosine 3-monooxygenase/tryptophan 5-monooxygenase activation protein, zeta polypeptide [Source:MGI Symbol;Acc:MGI:109484]	Ywhaz	protein_coding	0.309899	0.000774981	3.11071	0.0220097	4484	5993	5273	4330	5444	4522	4939.21	0.0921884	3.36158
ENSMUSG00000019373	COP9 signalosome subunit 3 [Source:MGI Symbol;Acc:MGI:1349409]	Cops3	protein_coding	-0.378055	0.000777728	3.10917	0.0220495	2114	2933	2213	3654	3490	3651	2929.04	0.112496	-3.3606
ENSMUSG00000029918	mitochondrial ribosomal protein S33 [Source:MGI Symbol;Acc:MGI:1338046]	Mrps33	protein_coding	0.762108	0.000780829	3.10744	0.0220992	309	347	244	171	96	171	225.629	0.226851	3.3595
ENSMUSG00000105949	predicted gene 6510 [Source:MGI Symbol;Acc:MGI:3645799]	Gm6510	processed_pseudogene	0.61301	0.000805149	3.09412	0.0227482	245	317	282	184	204	180	234.67	0.182933	3.35102
ENSMUSG00000089838	predicted pseudogene 2962 [Source:MGI Symbol;Acc:MGI:3781140]	Gm2962	processed_pseudogene	0.756972	0.000807745	3.09273	0.0227823	140	143	116	56	76	69	100.825	0.225953	3.35013
ENSMUSG00000075706	glutathione peroxidase 4 [Source:MGI Symbol;Acc:MGI:104767]	Gpx4	protein_coding	0.787399	0.000811235	3.09085	0.0228414	83	97	60	25	22	34	54.3629	0.235119	3.34893
ENSMUSG00000046262	expressed sequence C87977 [Source:MGI Symbol;Acc:MGI:2140708]	C87977	protein_coding	0.306791	0.000821006	3.08565	0.0230769	9914	13043	10321	10079	11020	9062	10437.6	0.0916994	3.34561
ENSMUSG00000033272	solute carrier family 35, member A4 [Source:MGI Symbol;Acc:MGI:1915093]	Slc35a4	protein_coding	0.371759	0.000851383	3.06987	0.0238898	2522	3112	2236	2051	2525	2212	2413.87	0.111454	3.33553
ENSMUSG00000028057	Ras-like without CAAX 1 [Source:MGI Symbol;Acc:MGI:108053]	Rit1	protein_coding	-0.553011	0.000864092	3.06344	0.0242049	454	776	670	1044	1305	1008	844.19	0.166	-3.3314
ENSMUSG00000036676	transmembrane and tetratricopeptide repeat containing 3 [Source:MGI Symbol;Acc:MGI:3036255]	Tmtc3	protein_coding	0.649986	0.000874364	3.05831	0.0244509	1470	1026	923	612	857	755	948.219	0.195302	3.32811
ENSMUSG00000081552	predicted gene 12328 [Source:MGI Symbol;Acc:MGI:3651322]	Gm12328	processed_pseudogene	0.782707	0.000890531	3.05035	0.0248605	75	94	78	37	32	28	58.1033	0.235542	3.32301
ENSMUSG00000042111	coiled-coil domain containing 115 [Source:MGI Symbol;Acc:MGI:1916918]	Ccdc115	protein_coding	0.391336	0.00089591	3.04774	0.0249682	3705	5068	3897	3706	3312	3630	3850.1	0.117825	3.32133
ENSMUSG00000004642	stem-loop binding protein [Source:MGI Symbol;Acc:MGI:108402]	Slbp	protein_coding	0.348201	0.000897722	3.04686	0.0249762	16837	21557	15705	14595	18742	14255	16717.1	0.104856	3.32076
ENSMUSG00000045205	dpy-19-like 4 (C. elegans) [Source:MGI Symbol;Acc:MGI:2685869]	Dpy19l4	protein_coding	-0.612403	0.00090477	3.04346	0.0250871	233	274	300	465	642	452	380.185	0.184538	-3.31858
ENSMUSG00000038496	solute carrier family 19, member 3 [Source:MGI Symbol;Acc:MGI:1931307]	Slc19a3	protein_coding	-0.59252	0.000904126	3.04377	0.0250871	0	0	0	28	54	45	19.3369	0.178536	-3.31878
ENSMUSG00000033107	ring finger protein 125 [Source:MGI Symbol;Acc:MGI:1914914]	Rnf125	protein_coding	0.701181	0.000907043	3.04237	0.0251076	268	356	217	145	206	135	220.27	0.211334	3.31788
ENSMUSG00000046311	zinc finger protein 62 [Source:MGI Symbol;Acc:MGI:99662]	Zfp62	protein_coding	-0.730743	0.000908997	3.04144	0.0251193	160	359	409	678	868	667	500.054	0.220284	-3.31728
ENSMUSG00000084349	ribosomal protein L3, pseudogene 1 [Source:MGI Symbol;Acc:MGI:3644217]	Rpl3-ps1	processed_pseudogene	0.774109	0.000911823	3.04009	0.025155	47	87	68	15	26	22	44.4579	0.233418	3.31641
ENSMUSG00000106059	predicted gene 9364 [Source:MGI Symbol;Acc:MGI:3646838]	Gm9364	processed_pseudogene	0.767385	0.000915773	3.03821	0.0252215	111	138	89	52	51	52	82.7393	0.231475	3.3152
ENSMUSG00000056770	SET domain containing 3 [Source:MGI Symbol;Acc:MGI:1289184]	Setd3	protein_coding	0.505463	0.00094894	3.02276	0.0260911	1076	1198	1320	989	877	874	1055.02	0.152928	3.30524
ENSMUSG00000009079	Ewing sarcoma breakpoint region 1 [Source:MGI Symbol;Acc:MGI:99960]	Ewsr1	protein_coding	0.470875	0.000951956	3.02138	0.0261302	927	1378	1229	881	1063	837	1041.46	0.142501	3.30435
ENSMUSG00000073119	spermatogenesis associated glutamate (E)-rich protein 4A [Source:MGI Symbol;Acc:MGI:1922907]	Speer4a	protein_coding	0.731075	0.000965255	3.01536	0.0264509	176	265	221	94	164	96	168.801	0.221507	3.30046
ENSMUSG00000035150	eukaryotic translation initiation factor 2, subunit 3, structural gene X-linked [Source:MGI Symbol;Acc:MGI:1349431]	Eif2s3x	protein_coding	0.766134	0.000987623	3.00541	0.0270187	58	56	70	17	25	15	41.1802	0.232583	3.29403
ENSMUSG00000063229	lactate dehydrogenase A [Source:MGI Symbol;Acc:MGI:96759]	Ldha	protein_coding	0.770792	0.000989781	3.00446	0.0270326	59	120	67	27	20	31	54.2168	0.23404	3.29342
ENSMUSG00000114179	eukaryotic translation initiation factor 1, pseudogene 2 [Source:MGI Symbol;Acc:MGI:3643793]	Eif1-ps2	processed_pseudogene	0.596732	0.000996244	3.00163	0.0271638	32	33	35	0	2	0	17.8747	0.18129	3.29159
ENSMUSG00000115017	predicted gene 2573 [Source:MGI Symbol;Acc:MGI:3780740]	Gm2573	processed_pseudogene	0.730683	0.00100854	2.99631	0.0274097	139	140	148	74	85	69	110.208	0.222218	3.28813
ENSMUSG00000006498	polypyrimidine tract binding protein 1 [Source:MGI Symbol;Acc:MGI:97791]	Ptbp1	protein_coding	0.36507	0.00100861	2.99628	0.0274097	2602	3995	3112	2663	2962	2731	2969.26	0.111027	3.28811
ENSMUSG00000090737	predicted gene 6788 [Source:MGI Symbol;Acc:MGI:3646480]	Gm6788	processed_pseudogene	0.725145	0.00101608	2.99307	0.027567	244	205	182	100	109	134	164.33	0.220675	3.28604
ENSMUSG00000113113	predicted gene 2614 [Source:MGI Symbol;Acc:MGI:3780782]	Gm2614	processed_pseudogene	0.770606	0.00105682	2.976	0.0285983	69	84	65	30	28	19	49.9249	0.235303	3.27495
ENSMUSG00000038095	strawberry notch 1 [Source:MGI Symbol;Acc:MGI:2384298]	Sbno1	protein_coding	-0.650278	0.00105758	2.97569	0.0285983	183	266	303	437	626	478	367.089	0.198574	-3.27474
ENSMUSG00000031362	X-linked lymphocyte-regulated 4C [Source:MGI Symbol;Acc:MGI:3574099]	Xlr4c	protein_coding	0.632023	0.00109506	2.96056	0.0295145	243	265	217	148	167	157	199.614	0.193582	3.26489
ENSMUSG00000050121	oligodendrocytic myelin paranodal and inner loop protein [Source:MGI Symbol;Acc:MGI:2657025]	Opalin	protein_coding	-0.501309	0.0010944	2.96082	0.0295145	311	358	323	495	636	548	431.289	0.153537	-3.26506
ENSMUSG00000032968	inhibin alpha [Source:MGI Symbol;Acc:MGI:96569]	Inha	protein_coding	0.731619	0.00110304	2.95741	0.0296807	348	356	79	93	28	61	164.946	0.224228	3.26283
ENSMUSG00000031600	vacuolar protein sorting 37A [Source:MGI Symbol;Acc:MGI:1261835]	Vps37a	protein_coding	-0.423533	0.00112473	2.94895	0.0302148	879	1318	908	1509	1736	1571	1278.48	0.130025	-3.25731
ENSMUSG00000060438	ribosomal protein S10, pseudogene 1 [Source:MGI Symbol;Acc:MGI:3644167]	Rps10-ps1	processed_pseudogene	0.676689	0.0011467	2.94055	0.0307544	283	261	235	166	174	130	209.646	0.208096	3.25182
ENSMUSG00000031913	vacuolar protein sorting 4A [Source:MGI Symbol;Acc:MGI:1890520]	Vps4a	protein_coding	-0.267813	0.00116347	2.93424	0.0311533	2120	2634	2241	2916	3506	3200	2699.8	0.0824626	-3.24769
ENSMUSG00000028089	chromodomain helicase DNA binding protein 1-like [Source:MGI Symbol;Acc:MGI:1915308]	Chd1l	protein_coding	-0.480368	0.00117428	2.93023	0.0313914	381	572	440	720	839	727	593.073	0.148031	-3.24505
ENSMUSG00000049553	polymerase (RNA) I polypeptide A [Source:MGI Symbol;Acc:MGI:1096397]	Polr1a	protein_coding	-0.57224	0.00118601	2.92591	0.0316532	607	965	773	1048	1881	1369	1060.93	0.176496	-3.24222
ENSMUSG00000054008	N-deacetylase/N-sulfotransferase (heparan glucosaminyl) 1 [Source:MGI Symbol;Acc:MGI:104719]	Ndst1	protein_coding	-0.762815	0.00121305	2.91612	0.0323224	45	79	25	131	189	172	100.776	0.235743	-3.23579
ENSMUSG00000020115	TANK-binding kinase 1 [Source:MGI Symbol;Acc:MGI:1929658]	Tbk1	protein_coding	-0.60261	0.00121887	2.91404	0.0324247	280	566	380	753	804	739	564.264	0.186311	-3.23443
ENSMUSG00000021243	FCF1 rRNA processing protein [Source:MGI Symbol;Acc:MGI:1920986]	Fcf1	protein_coding	0.630791	0.00122859	2.91059	0.0326303	1115	1113	841	827	548	600	846.084	0.195161	3.23216
ENSMUSG00000108533	predicted gene 44792 [Source:MGI Symbol;Acc:MGI:5753368]	Gm44792	TEC	0.595878	0.00124307	2.9055	0.0329615	29	35	31	0	3	1	17.1891	0.18455	3.22881
ENSMUSG00000084081	predicted gene 12057 [Source:MGI Symbol;Acc:MGI:3650030]	Gm12057	processed_pseudogene	0.754879	0.0012527	2.90215	0.0331633	95	105	141	46	62	45	83.4667	0.233955	3.2266
ENSMUSG00000082423	predicted gene 15148 [Source:MGI Symbol;Acc:MGI:3705350]	Gm15148	processed_pseudogene	0.623112	0.00126709	2.89719	0.03349	24	43	37	5	1	2	19.2586	0.193313	3.22333
ENSMUSG00000037487	ubiquitin protein ligase E3 component n-recognin 5 [Source:MGI Symbol;Acc:MGI:1918040]	Ubr5	protein_coding	0.61591	0.001283	2.89177	0.0338558	322	300	336	212	218	209	267.588	0.191291	3.21976
ENSMUSG00000058440	nuclear respiratory factor 1 [Source:MGI Symbol;Acc:MGI:1332235]	Nrf1	protein_coding	-0.28848	0.0012888	2.88982	0.0339542	4157	5063	4183	5732	7234	5800	5219.98	0.0896328	-3.21846
ENSMUSG00000097242	predicted gene, 16907 [Source:MGI Symbol;Acc:MGI:4439831]	Gm16907	lincRNA	-0.580505	0.00129125	2.88899	0.0339642	0	0	2	42	61	27	20.2078	0.180398	-3.21792
ENSMUSG00000107968	predicted gene, 44419 [Source:MGI Symbol;Acc:MGI:5690811]	Gm44419	processed_pseudogene	0.550935	0.00132319	2.87838	0.0347089	630	581	566	375	520	404	512.198	0.171583	3.2109
ENSMUSG00000024165	Jupiter microtubule associated homolog 2 [Source:MGI Symbol;Acc:MGI:1196260]	Jpt2	protein_coding	0.286349	0.0013238	2.87818	0.0347089	6459	7494	7228	6232	6542	6803	6727.9	0.0891839	3.21077
ENSMUSG00000117074	interferon induced transmembrane protein 3 (Ifitm3) pseudogene	AC121299.1	processed_pseudogene	0.632994	0.00132804	2.87679	0.0347645	28	43	33	5	1	4	19.6074	0.197204	3.20985
ENSMUSG00000096696	zinc finger protein 960 [Source:MGI Symbol;Acc:MGI:3052731]	Zfp960	protein_coding	0.755412	0.00134858	2.87012	0.0352459	108	250	231	80	43	95	135.473	0.235666	3.20544
ENSMUSG00000038628	polymerase (RNA) III (DNA directed) polypeptide K [Source:MGI Symbol;Acc:MGI:1914255]	Polr3k	protein_coding	-0.305933	0.00136077	2.86622	0.0355078	1399	1789	1524	2028	2488	2161	1847.43	0.0955192	-3.20285
ENSMUSG00000039913	p21 (RAC1) activated kinase 7 [Source:MGI Symbol;Acc:MGI:1920334]	Pak7	protein_coding	-0.363293	0.00137336	2.86221	0.0357795	2467	3697	2911	3960	5212	4256	3633.4	0.113522	-3.20019
ENSMUSG00000028484	PC4 and SFRS1 interacting protein 1 [Source:MGI Symbol;Acc:MGI:2142116]	Psip1	protein_coding	0.324625	0.00137696	2.86108	0.0358163	3497	3983	3969	3145	3490	3650	3590.85	0.101463	3.19944
ENSMUSG00000046991	WD repeat domain 27 [Source:MGI Symbol;Acc:MGI:1918932]	Wdr27	protein_coding	-0.743972	0.00138796	2.85762	0.0360453	13	47	28	86	151	111	67.9137	0.232699	-3.19714
ENSMUSG00000036641	coiled-coil domain containing 148 [Source:MGI Symbol;Acc:MGI:3039583]	Ccdc148	protein_coding	-0.638881	0.00139357	2.85587	0.0361335	8	10	1	46	124	47	35.9222	0.199901	-3.19598
ENSMUSG00000021365	neural precursor cell expressed, developmentally down-regulated gene 9 [Source:MGI Symbol;Acc:MGI:97302]	Nedd9	protein_coding	-0.4624	0.0013977	2.85459	0.0361833	573	778	698	996	1076	1243	867.974	0.14472	-3.19513
ENSMUSG00000090841	myosin, light polypeptide 6, alkali, smooth muscle and non-muscle [Source:MGI Symbol;Acc:MGI:109318]	Myl6	protein_coding	0.743391	0.00141587	2.84898	0.0363097	75	61	50	17	24	20	42.2124	0.232936	3.1914
ENSMUSG00000025283	spermidine/spermine N1-acetyl transferase 1 [Source:MGI Symbol;Acc:MGI:98233]	Sat1	protein_coding	0.708111	0.00141023	2.85071	0.0363097	152	165	136	83	74	89	117.415	0.221801	3.19255
ENSMUSG00000039789	zinc finger protein 597 [Source:MGI Symbol;Acc:MGI:1918313]	Zfp597	protein_coding	-0.682688	0.0014124	2.85004	0.0363097	168	307	171	459	383	554	327.224	0.213868	-3.1921
ENSMUSG00000071369	mitogen-activated protein kinase kinase kinase 5 [Source:MGI Symbol;Acc:MGI:1346876]	Map3k5	protein_coding	-0.370083	0.00141415	2.8495	0.0363097	1667	1822	1755	2255	2746	2869	2129.73	0.11595	-3.19175
ENSMUSG00000002055	sperm associated antigen 5 [Source:MGI Symbol;Acc:MGI:1927470]	Spag5	protein_coding	-0.369503	0.00140818	2.85134	0.0363097	880	1040	947	1254	1634	1409	1160.73	0.115724	-3.19297
ENSMUSG00000001228	ubiquitin-like, containing PHD and RING finger domains, 1 [Source:MGI Symbol;Acc:MGI:1338889]	Uhrf1	protein_coding	0.316507	0.0014121	2.85014	0.0363097	11186	13543	12969	9907	11611	12531	11832.8	0.099151	3.19217
ENSMUSG00000086454	pluripotency associated transcript 14 [Source:MGI Symbol;Acc:MGI:1922209]	Platr14	processed_transcript	-0.571708	0.00146139	2.83523	0.0373601	210	279	283	484	456	472	353.007	0.179656	-3.18224
ENSMUSG00000059923	growth factor receptor bound protein 2 [Source:MGI Symbol;Acc:MGI:95805]	Grb2	protein_coding	0.513247	0.00146028	2.83556	0.0373601	497	596	533	409	469	347	472.607	0.161273	3.18246
ENSMUSG00000030849	fibroblast growth factor receptor 2 [Source:MGI Symbol;Acc:MGI:95523]	Fgfr2	protein_coding	-0.399702	0.00146684	2.83362	0.0374409	1116	1461	1148	1800	2246	1660	1524.27	0.125646	-3.18117
ENSMUSG00000013076	angiomotin-like 1 [Source:MGI Symbol;Acc:MGI:1922973]	Amotl1	protein_coding	-0.736188	0.00148386	2.82861	0.0378164	82	237	205	426	619	351	303.034	0.231664	-3.17782
ENSMUSG00000020189	oxysterol binding protein-like 8 [Source:MGI Symbol;Acc:MGI:2443807]	Osbpl8	protein_coding	-0.364484	0.00149431	2.82556	0.0380236	2432	2854	2999	3705	4211	4435	3353.33	0.11477	-3.17579
ENSMUSG00000113198	predicted gene 6988 [Source:MGI Symbol;Acc:MGI:3647486]	Gm6988	processed_pseudogene	0.576977	0.00150498	2.82247	0.0382357	29	26	32	1	0	2	15.8548	0.181798	3.17372
ENSMUSG00000057863	ribosomal protein L36 [Source:MGI Symbol;Acc:MGI:1860603]	Rpl36	protein_coding	0.738504	0.00151149	2.82059	0.0383418	79	73	49	26	20	19	45.4129	0.232785	3.17247
ENSMUSG00000109489	predicted gene 7451 [Source:MGI Symbol;Acc:MGI:3645148]	Gm7451	processed_pseudogene	0.68047	0.00152659	2.81628	0.0386649	27	47	46	7	11	5	24.3146	0.214688	3.16958
ENSMUSG00000031843	M phase phosphoprotein 6 [Source:MGI Symbol;Acc:MGI:1915783]	Mphosph6	protein_coding	0.349234	0.00153551	2.81375	0.0388308	17365	21910	16804	15110	19981	14221	17329	0.110242	3.16789
ENSMUSG00000056870	GULP, engulfment adaptor PTB domain containing 1 [Source:MGI Symbol;Acc:MGI:1920407]	Gulp1	protein_coding	-0.744116	0.00155625	2.80792	0.0392948	59	36	27	129	201	111	89.0267	0.235183	-3.16398
ENSMUSG00000002728	N(alpha)-acetyltransferase 20, NatB catalytic subunit [Source:MGI Symbol;Acc:MGI:1915127]	Naa20	protein_coding	0.665816	0.00156308	2.80602	0.0394064	513	628	439	347	220	368	420.946	0.210521	3.16271
ENSMUSG00000063281	zinc finger protein 35 [Source:MGI Symbol;Acc:MGI:99179]	Zfp35	protein_coding	-0.522225	0.00159279	2.79784	0.0400938	415	443	418	590	794	842	565.506	0.165407	-3.15722
ENSMUSG00000104059	predicted pseudogene 9124 [Source:MGI Symbol;Acc:MGI:3644979]	Gm9124	unprocessed_pseudogene	0.565511	0.00160495	2.79454	0.0403378	23	26	27	0	1	1	13.6296	0.179243	3.15501
ENSMUSG00000021918	NIMA (never in mitosis gene a)-related expressed kinase 4 [Source:MGI Symbol;Acc:MGI:1344404]	Nek4	protein_coding	-0.737529	0.00163464	2.78658	0.0409584	148	109	71	209	461	293	204.079	0.234162	-3.14965
ENSMUSG00000057836	X-linked lymphocyte-regulated 3A [Source:MGI Symbol;Acc:MGI:109506]	Xlr3a	protein_coding	0.578511	0.00163383	2.78679	0.0409584	726	907	668	591	423	562	645.865	0.183666	3.1498
ENSMUSG00000064343	mitochondrially encoded tRNA glutamine [Source:MGI Symbol;Acc:MGI:102477]	mt-Tq	Mt_tRNA	-0.736907	0.00164888	2.78281	0.0411892	31	27	19	121	75	89	58.0087	0.234153	-3.14712
ENSMUSG00000081137	cDNA sequence BC022960 [Source:MGI Symbol;Acc:MGI:2670977]	BC022960	transcribed_processed_pseudogene	0.341504	0.00164857	2.78289	0.0411892	1661	2049	1557	1404	1726	1522	1632.87	0.108511	3.14717
ENSMUSG00000079071	predicted gene 14085 [Source:MGI Symbol;Acc:MGI:3702173]	Gm14085	protein_coding	0.698104	0.00167561	2.77583	0.0417934	306	433	200	156	155	197	240.552	0.222155	3.14241
ENSMUSG00000082820	predicted gene 13803 [Source:MGI Symbol;Acc:MGI:3651056]	Gm13803	processed_pseudogene	0.715618	0.00168193	2.77419	0.0418873	138	173	128	63	102	62	111.093	0.227809	3.14131
ENSMUSG00000072940	predicted pseudogene 10443 [Source:MGI Symbol;Acc:MGI:3704272]	Gm10443	processed_pseudogene	0.644489	0.00168938	2.77227	0.0420089	34	39	31	8	4	3	20.5334	0.20525	3.14002
ENSMUSG00000005981	TNF receptor-associated protein 1 [Source:MGI Symbol;Acc:MGI:1915265]	Trap1	protein_coding	-0.341929	0.00169195	2.77161	0.0420091	1910	2005	1713	2521	2874	2849	2255.94	0.108909	-3.13957
ENSMUSG00000090015	predicted gene 15446 [Source:MGI Symbol;Acc:MGI:3709333]	Gm15446	protein_coding	0.593001	0.00172267	2.7638	0.0427071	1637	1591	1488	1183	767	1234	1325.64	0.189197	3.1343
ENSMUSG00000036840	siah E3 ubiquitin protein ligase 1A [Source:MGI Symbol;Acc:MGI:108064]	Siah1a	protein_coding	0.322635	0.0017354	2.7606	0.0429576	2176	2711	2028	1902	2181	2106	2157.37	0.103008	3.13214
ENSMUSG00000038750	oocyte maturation, beta [Source:MGI Symbol;Acc:MGI:106619]	Omt2b	protein_coding	0.337796	0.00176732	2.75268	0.0436819	9518	11261	8833	9204	9231	7726	9206.67	0.108033	3.12678
ENSMUSG00000074366	oocyte specific homeobox 5 [Source:MGI Symbol;Acc:MGI:2149035]	Obox5	protein_coding	0.292271	0.00177215	2.7515	0.0437352	18556	23821	19246	18978	20903	16604	19433.5	0.0934974	3.12598
ENSMUSG00000025903	lysophospholipase 1 [Source:MGI Symbol;Acc:MGI:1344588]	Lypla1	protein_coding	-0.37866	0.00182275	2.73927	0.0449163	979	1115	937	1554	1508	1494	1233.82	0.121455	-3.11769
ENSMUSG00000025103	BTB (POZ) domain containing 1 [Source:MGI Symbol;Acc:MGI:1933765]	Btbd1	protein_coding	0.733181	0.00186908	2.72837	0.0459889	120	322	169	87	54	101	141.424	0.235728	3.11028
ENSMUSG00000085611	adaptor-related protein complex 3, sigma 1 subunit, pseudogene 1 [Source:MGI Symbol;Acc:MGI:1929216]	Ap3s1-ps1	processed_pseudogene	0.595203	0.00189684	2.72197	0.0465001	23	29	30	3	1	3	15.4435	0.191635	3.10593
ENSMUSG00000028218	family with sequence similarity 92, member A [Source:MGI Symbol;Acc:MGI:1915349]	Fam92a	protein_coding	-0.510064	0.00189368	2.72269	0.0465001	237	307	245	446	459	441	345.024	0.164197	-3.10642
ENSMUSG00000072419	developmental pluripotency associated 2 [Source:MGI Symbol;Acc:MGI:2157523]	Dppa2	protein_coding	0.457142	0.00189837	2.72162	0.0465001	917	1179	1071	786	1029	711	939.867	0.147195	3.10569
ENSMUSG00000067161	predicted pseudogene 5560 [Source:MGI Symbol;Acc:MGI:3647980]	Gm5560	processed_pseudogene	0.678174	0.00190326	2.7205	0.0465503	182	216	167	86	143	97	148.349	0.218419	3.10493
ENSMUSG00000024091	vesicle-associated membrane protein, associated protein A [Source:MGI Symbol;Acc:MGI:1353561]	Vapa	protein_coding	-0.28356	0.00193182	2.71403	0.0471785	2134	2709	2424	2989	3671	3469	2824.74	0.0914558	-3.10052
ENSMUSG00000114053	novel transcript	AC133498.1	lincRNA	-0.486036	0.0019587	2.70803	0.0477638	417	485	353	642	802	655	541.321	0.156967	-3.09642
ENSMUSG00000109227	predicted gene, 29791 [Source:MGI Symbol;Acc:MGI:5588950]	Gm29791	transcribed_processed_pseudogene	0.725275	0.00197094	2.70533	0.0479909	102	148	106	64	40	55	86.5165	0.23437	3.09458
ENSMUSG00000032915	adhesion G protein-coupled receptor E4 [Source:MGI Symbol;Acc:MGI:1196464]	Adgre4	protein_coding	-0.565431	0.00197455	2.70453	0.0480074	227	287	306	506	573	429	375.402	0.182749	-3.09403
ENSMUSG00000025287	acyl-CoA thioesterase 9 [Source:MGI Symbol;Acc:MGI:1928939]	Acot9	protein_coding	0.525323	0.00200293	2.69833	0.0486252	584	738	755	469	639	434	599.318	0.170018	3.0898
ENSMUSG00000074832	RIKEN cDNA 2410141K09 gene [Source:MGI Symbol;Acc:MGI:1924053]	2410141K09Rik	protein_coding	0.727774	0.00201463	2.6958	0.0488369	238	121	175	60	109	64	131.385	0.235673	3.08807
ENSMUSG00000028124	glutamate-cysteine ligase, modifier subunit [Source:MGI Symbol;Acc:MGI:104995]	Gclm	protein_coding	-0.313375	0.00202954	2.6926	0.0491257	1263	1479	1406	1914	2080	1929	1638.45	0.101552	-3.08588
ENSMUSG00000067017	predicted gene 3608 [Source:MGI Symbol;Acc:MGI:3804932]	Gm3608	pseudogene	0.573305	0.00204578	2.68914	0.0494181	433	430	523	328	305	333	393.677	0.185926	3.0835
ENSMUSG00000031823	zinc finger, DHHC domain containing 7 [Source:MGI Symbol;Acc:MGI:2142662]	Zdhhc7	protein_coding	-0.54806	0.00204765	2.68874	0.0494181	476	806	432	943	1089	1001	761.277	0.177755	-3.08323
ENSMUSG00000062444	adaptor-related protein complex 3, beta 2 subunit [Source:MGI Symbol;Acc:MGI:1100869]	Ap3b2	protein_coding	0.723629	0.00205527	2.68713	0.049529	260	134	214	68	119	96	152.387	0.234782	3.08213
ENSMUSG00000105113	predicted gene 2622 [Source:MGI Symbol;Acc:MGI:3780790]	Gm2622	processed_pseudogene	0.597674	0.0020638	2.68533	0.0496615	26	26	28	4	2	2	15.338	0.193994	3.08089
ENSMUSG00000022193	proteasome (prosome, macropain) subunit, beta type 5 [Source:MGI Symbol;Acc:MGI:1194513]	Psmb5	protein_coding	0.705904	0.00207173	2.68367	0.0497793	144	289	285	139	103	119	180.226	0.229208	3.07975
ENSMUSG00000006019	DEAH (Asp-Glu-Ala-His) box polypeptide 34 [Source:MGI Symbol;Acc:MGI:1918973]	Dhx34	protein_coding	-0.577991	0.00208063	2.6818	0.049847	288	268	341	494	680	529	419.332	0.187753	-3.07847
ENSMUSG00000025218	polymerase (DNA directed), lambda [Source:MGI Symbol;Acc:MGI:1889000]	Poll	protein_coding	-0.395841	0.00207911	2.68212	0.049847	584	723	643	884	1036	1064	799.62	0.128574	-3.07869
ENSMUSG00000117241	DEAD (Asp-Glu-Ala-Asp) box polypeptide 18 (Ddx18) pseudogene	AC122481.1	processed_pseudogene	0.575701	0.00208453	2.68099	0.0498674	34	40	48	3	6	0	22.769	0.187042	3.07792
ENSMUSG00000031935	mediator complex subunit 17 [Source:MGI Symbol;Acc:MGI:2182585]	Med17	protein_coding	-0.235472	0.0021104	2.67564	0.0504127	8515	10998	8859	12539	13260	12140	10790.3	0.0765951	-3.07424
ENSMUSG00000071379	hippocalcin-like 1 [Source:MGI Symbol;Acc:MGI:1855689]	Hpcal1	protein_coding	0.343249	0.0021181	2.67405	0.0505229	3088	3784	2672	2562	3100	2741	2954.14	0.111693	3.07315
ENSMUSG00000024181	mitochondrial ribosomal protein L28 [Source:MGI Symbol;Acc:MGI:1915861]	Mrpl28	protein_coding	-0.392941	0.00212663	2.67231	0.0505793	911	1260	933	1618	1577	1503	1264.56	0.127912	-3.07195
ENSMUSG00000027379	BUB1, mitotic checkpoint serine/threonine kinase [Source:MGI Symbol;Acc:MGI:1100510]	Bub1	protein_coding	-0.267226	0.00212562	2.67251	0.0505793	2732	3665	3105	4098	4477	4445	3660.48	0.0869849	-3.0721
ENSMUSG00000062861	zinc finger protein 28 [Source:MGI Symbol;Acc:MGI:99175]	Zfp28	protein_coding	0.581779	0.00213675	2.67025	0.0507464	396	389	342	283	262	228	317.588	0.189471	3.07054
ENSMUSG00000080775	predicted gene 6368 [Source:MGI Symbol;Acc:MGI:3644537]	Gm6368	processed_pseudogene	0.499043	0.00215209	2.66714	0.0510367	813	783	829	529	763	576	713.105	0.16264	3.0684
ENSMUSG00000008730	homeodomain interacting protein kinase 1 [Source:MGI Symbol;Acc:MGI:1314873]	Hipk1	protein_coding	0.718116	0.00217235	2.66307	0.0514426	103	100	51	24	33	35	58.5858	0.23425	3.0656
ENSMUSG00000017499	cell division cycle 6 [Source:MGI Symbol;Acc:MGI:1345150]	Cdc6	protein_coding	0.483413	0.00219367	2.65883	0.0517979	1407	2497	2040	1438	1790	1329	1726.6	0.15784	3.06268
ENSMUSG00000039166	A kinase (PRKA) anchor protein 7 [Source:MGI Symbol;Acc:MGI:1859150]	Akap7	protein_coding	-0.372759	0.00219208	2.65914	0.0517979	1293	1556	1207	1693	2318	2088	1642.75	0.121702	-3.06289
ENSMUSG00000034738	nitric oxide synthase trafficker [Source:MGI Symbol;Acc:MGI:3606242]	Nostrin	protein_coding	-0.655658	0.00222036	2.65358	0.0523291	123	112	163	261	310	299	204.216	0.214333	-3.05906
ENSMUSG00000021116	eukaryotic translation initiation factor 2, subunit 1 alpha [Source:MGI Symbol;Acc:MGI:95299]	Eif2s1	protein_coding	0.490239	0.00222256	2.65315	0.0523291	1489	1771	1086	1108	1218	996	1268.22	0.160274	3.05876
ENSMUSG00000032320	reticulocalbin 2 [Source:MGI Symbol;Acc:MGI:1349765]	Rcn2	protein_coding	-0.292304	0.00223826	2.65009	0.0526231	3479	3703	3323	4893	5134	4745	4119.73	0.095629	-3.05665
ENSMUSG00000087377	expressed sequence AV099323 [Source:MGI Symbol;Acc:MGI:2139252]	AV099323	antisense	-0.698492	0.00225451	2.64695	0.0529294	10	23	12	49	77	66	37.0141	0.228678	-3.05448
ENSMUSG00000035236	suppressor of cancer cell invasion [Source:MGI Symbol;Acc:MGI:2443716]	Scai	protein_coding	-0.713677	0.00227969	2.64212	0.0534438	72	56	102	258	200	181	140.099	0.233904	-3.05115
ENSMUSG00000024105	thymocyte selection associated family member 3 [Source:MGI Symbol;Acc:MGI:1921806]	Themis3	protein_coding	-0.534832	0.00228549	2.64102	0.0535034	435	574	390	630	1025	828	622.253	0.175333	-3.05038
ENSMUSG00000006373	progesterone receptor membrane component 1 [Source:MGI Symbol;Acc:MGI:1858305]	Pgrmc1	protein_coding	-0.447407	0.00230014	2.63825	0.0537694	751	867	631	1188	1371	1058	948.828	0.146765	-3.04846
ENSMUSG00000092454	predicted pseudogene 2991 [Source:MGI Symbol;Acc:MGI:3781169]	Gm2991	processed_pseudogene	0.683955	0.00232634	2.63333	0.0543044	50	48	61	8	22	14	34.714	0.224611	3.04506
ENSMUSG00000014418	HPS5, biogenesis of lysosomal organelles complex 2 subunit 2 [Source:MGI Symbol;Acc:MGI:2180307]	Hps5	protein_coding	-0.571037	0.00237504	2.62433	0.0553428	399	543	314	603	840	883	574.324	0.187914	-3.03882
ENSMUSG00000015488	calcium channel flower domain containing 1 [Source:MGI Symbol;Acc:MGI:1924317]	Cacfd1	protein_coding	-0.407976	0.00237758	2.62387	0.0553428	486	588	495	744	925	765	647.741	0.134269	-3.0385
ENSMUSG00000027175	t-complex 11 like 1 [Source:MGI Symbol;Acc:MGI:2444263]	Tcp11l1	protein_coding	0.632408	0.00241099	2.6178	0.0559789	31	47	31	5	4	10	21.8035	0.20842	3.03429
ENSMUSG00000035443	thymocyte nuclear protein 1 [Source:MGI Symbol;Acc:MGI:1925112]	Thyn1	protein_coding	-0.532303	0.00241173	2.61767	0.0559789	588	855	502	1257	1109	1020	860.305	0.175434	-3.0342
ENSMUSG00000016382	plastin 3 (T-isoform) [Source:MGI Symbol;Acc:MGI:104807]	Pls3	protein_coding	0.680126	0.00244384	2.61193	0.0566438	119	160	143	59	91	83	109.182	0.224449	3.03021
ENSMUSG00000023307	membrane-associated ring finger (C3HC4) 5 [Source:MGI Symbol;Acc:MGI:1915207]	2019-03-05	protein_coding	0.280857	0.00246689	2.60785	0.0570974	9278	12208	8717	8792	10097	8985	9539.83	0.0927725	3.02737
ENSMUSG00000049751	ribosomal protein L36A-like [Source:MGI Symbol;Acc:MGI:1913733]	Rpl36al	protein_coding	0.688669	0.00250405	2.60136	0.0578756	300	236	243	175	104	134	202.48	0.227821	3.02285
ENSMUSG00000051234	ring finger protein 7 [Source:MGI Symbol;Acc:MGI:1337096]	Rnf7	protein_coding	0.708951	0.00250886	2.60052	0.0578876	187	219	196	103	51	120	148.168	0.234576	3.02227
ENSMUSG00000026788	zinc finger and BTB domain containing 43 [Source:MGI Symbol;Acc:MGI:1919084]	Zbtb43	protein_coding	0.706881	0.0025128	2.59984	0.0578876	114	153	240	61	32	89	117.488	0.233928	3.0218
ENSMUSG00000037315	jade family PHD finger 3 [Source:MGI Symbol;Acc:MGI:2148019]	Jade3	protein_coding	-0.515374	0.00251516	2.59943	0.0578876	1	0	0	22	181	28	34.1459	0.170568	-3.02151
ENSMUSG00000111446	predicted gene 6581 [Source:MGI Symbol;Acc:MGI:3648298]	Gm6581	processed_pseudogene	0.600259	0.00252466	2.5978	0.0580247	354	334	304	233	194	229	276.302	0.198737	3.02037
ENSMUSG00000082709	predicted gene 12362 [Source:MGI Symbol;Acc:MGI:3652292]	Gm12362	processed_pseudogene	0.625419	0.00260144	2.58479	0.0597055	25	35	32	6	4	6	18.5119	0.207692	3.01129
ENSMUSG00000038299	WD repeat domain 36 [Source:MGI Symbol;Acc:MGI:1917819]	Wdr36	protein_coding	-0.22581	0.00260778	2.58373	0.0597674	4563	5766	5148	6521	7137	6942	5874.63	0.0750064	-3.01055
ENSMUSG00000038155	glutathione S-transferase, pi 2 [Source:MGI Symbol;Acc:MGI:95864]	Gstp2	protein_coding	0.62137	0.00261184	2.58305	0.0597768	60	37	42	3	15	7	28.5517	0.20643	3.01007
ENSMUSG00000086691	predicted gene 15432 [Source:MGI Symbol;Acc:MGI:3801969]	Gm15432	processed_pseudogene	0.538367	0.00262745	2.58047	0.0600502	26	41	25	1	0	3	16.51	0.178963	3.00826
ENSMUSG00000067925	retrotransposon Gag like 8A [Source:MGI Symbol;Acc:MGI:1913408]	Rtl8a	protein_coding	0.702043	0.00263383	2.57941	0.0601122	84	107	57	21	45	23	56.5097	0.233429	3.00753
ENSMUSG00000031015	SWA-70 protein [Source:MGI Symbol;Acc:MGI:1298390]	Swap70	protein_coding	-0.445739	0.00264222	2.57803	0.0602198	485	514	537	739	957	793	651.736	0.148256	-3.00656
ENSMUSG00000113260	predicted gene, 19428 [Source:MGI Symbol;Acc:MGI:5011613]	Gm19428	transcribed_processed_pseudogene	0.689296	0.00265336	2.5762	0.0603387	108	160	41	27	31	37	67.6025	0.229362	3.00528
ENSMUSG00000079583	predicted gene 7073 [Source:MGI Symbol;Acc:MGI:3779666]	Gm7073	protein_coding	-0.678101	0.0026548	2.57597	0.0603387	55	70	54	147	141	132	96.0523	0.225649	-3.00512
ENSMUSG00000000740	ribosomal protein L13 [Source:MGI Symbol;Acc:MGI:105922]	Rpl13	protein_coding	0.704696	0.0026903	2.5702	0.0609688	106	112	74	38	55	42	71.7388	0.234815	3.00107
ENSMUSG00000030088	aldehyde dehydrogenase 1 family, member L1 [Source:MGI Symbol;Acc:MGI:1340024]	Aldh1l1	protein_coding	-0.619392	0.00271229	2.56666	0.0609688	117	171	141	248	271	345	207.696	0.206561	-2.99859
ENSMUSG00000014077	calcineurin-like EF hand protein 1 [Source:MGI Symbol;Acc:MGI:1927185]	Chp1	protein_coding	0.540544	0.0027117	2.56676	0.0609688	1076	1912	1775	983	1465	974	1347.79	0.180262	2.99866
ENSMUSG00000043866	TATA-box binding protein associated factor 10 [Source:MGI Symbol;Acc:MGI:1346320]	Taf10	protein_coding	0.50559	0.0027026	2.56822	0.0609688	557	774	572	471	421	523	549.475	0.168548	2.99968
ENSMUSG00000111350	predicted gene, 47182 [Source:MGI Symbol;Acc:MGI:6095970]	Gm47182	unprocessed_pseudogene	-0.381041	0.00271194	2.56672	0.0609688	1109	1124	979	1478	1852	1562	1315.12	0.127072	-2.99863
ENSMUSG00000033047	eukaryotic translation initiation factor 3, subunit L [Source:MGI Symbol;Acc:MGI:2386251]	Eif3l	protein_coding	-0.373174	0.00268814	2.57055	0.0609688	2394	3071	2554	3314	5033	3751	3247.07	0.124337	-3.00132
ENSMUSG00000019775	regulator of G-protein signaling 17 [Source:MGI Symbol;Acc:MGI:1927469]	Rgs17	protein_coding	-0.371212	0.00269657	2.56919	0.0609688	2029	2397	1899	3405	3048	2978	2563.54	0.123722	-3.00036
ENSMUSG00000015880	non-SMC condensin I complex, subunit G [Source:MGI Symbol;Acc:MGI:1930197]	Ncapg	protein_coding	-0.247366	0.00269871	2.56884	0.0609688	8851	9601	9281	12151	13487	12090	10674.1	0.0824518	-3.00012
ENSMUSG00000035448	chemokine (C-C motif) receptor 3 [Source:MGI Symbol;Acc:MGI:104616]	Ccr3	protein_coding	-0.705144	0.00272922	2.56396	0.0611816	37	65	30	113	220	98	87.9837	0.235307	-2.9967
ENSMUSG00000026683	NUF2, NDC80 kinetochore complex component [Source:MGI Symbol;Acc:MGI:1914227]	Nuf2	protein_coding	-0.241088	0.00272766	2.56421	0.0611816	4139	5074	4261	6025	6299	5806	5147.1	0.0804465	-2.99687
ENSMUSG00000042567	NIMA (never in mitosis gene a)- related kinase 10 [Source:MGI Symbol;Acc:MGI:2685128]	Nek10	protein_coding	-0.684384	0.00274077	2.56213	0.0613565	199	573	198	667	769	841	513.645	0.228478	-2.99541
ENSMUSG00000026646	suppressor of variegation 3-9 2 [Source:MGI Symbol;Acc:MGI:1890396]	Suv39h2	protein_coding	-0.287783	0.00276484	2.55833	0.061811	2720	3655	2901	4303	4623	3985	3602.9	0.0961604	-2.99274
ENSMUSG00000031979	component of oligomeric golgi complex 2 [Source:MGI Symbol;Acc:MGI:1923582]	Cog2	protein_coding	-0.502315	0.00286123	2.54345	0.0638787	0	0	0	17	51	68	20.6712	0.168434	-2.98227
ENSMUSG00000030001	folliculogenesis specific basic helix-loop-helix [Source:MGI Symbol;Acc:MGI:1349421]	Figla	protein_coding	-0.559027	0.00287338	2.54161	0.0640626	335	427	268	516	801	582	469.093	0.187532	-2.98097
ENSMUSG00000069379	predicted pseudogene 4950 [Source:MGI Symbol;Acc:MGI:3649015]	Gm4950	protein_coding	0.702376	0.00288313	2.54014	0.0641057	103	99	72	48	34	31	65.694	0.235702	2.97993
ENSMUSG00000062006	ribosomal protein L34 [Source:MGI Symbol;Acc:MGI:1915686]	Rpl34	protein_coding	0.643632	0.0028796	2.54067	0.0641057	214	246	200	157	132	105	176.42	0.215962	2.98031
ENSMUSG00000008129	RIKEN cDNA 4930432K21 gene [Source:MGI Symbol;Acc:MGI:1921916]	4930432K21Rik	protein_coding	-0.408937	0.00288931	2.53921	0.0641559	1632	2258	1683	2893	2536	3124	2292.14	0.13726	-2.97928
ENSMUSG00000115272	novel transcript	AC154806.1	lincRNA	0.673415	0.00292071	2.53451	0.0647655	141	262	168	117	89	99	145.529	0.226285	2.97596
ENSMUSG00000034021	PDS5 cohesin associated factor B [Source:MGI Symbol;Acc:MGI:2140945]	Pds5b	protein_coding	-0.58225	0.00299559	2.52352	0.0662465	155	205	184	358	302	370	254.417	0.196163	-2.96819
ENSMUSG00000082844	predicted gene 13537 [Source:MGI Symbol;Acc:MGI:3651462]	Gm13537	processed_pseudogene	0.497131	0.00299179	2.52407	0.0662465	22	37	30	0	0	0	15.399	0.167464	2.96858
ENSMUSG00000090624	predicted gene 17060 [Source:MGI Symbol;Acc:MGI:4937887]	Gm17060	processed_pseudogene	0.505701	0.00300058	2.52279	0.0662676	24	30	22	0	1	0	13.3835	0.170403	2.96768
ENSMUSG00000081308	predicted gene 14480 [Source:MGI Symbol;Acc:MGI:3650191]	Gm14480	processed_pseudogene	0.616731	0.00300753	2.52179	0.0663316	33	38	26	5	9	4	19.6624	0.207866	2.96697
ENSMUSG00000025159	MMS19 cytosolic iron-sulfur assembly component [Source:MGI Symbol;Acc:MGI:1919449]	Mms19	protein_coding	-0.323066	0.00302398	2.51942	0.0666047	1484	1987	1660	2109	2648	2619	2026.52	0.108949	-2.96529
ENSMUSG00000004929	thimet oligopeptidase 1 [Source:MGI Symbol;Acc:MGI:1354165]	Thop1	protein_coding	-0.290435	0.00308722	2.51043	0.0679065	2117	2786	2554	3245	3905	3303	2906.91	0.0981557	-2.95892
ENSMUSG00000028927	peptidyl arginine deiminase, type II [Source:MGI Symbol;Acc:MGI:1338892]	Padi2	protein_coding	-0.678917	0.00310106	2.50849	0.0681193	10	38	22	104	82	85	53.8581	0.229555	-2.95754
ENSMUSG00000025757	heat shock protein 4 like [Source:MGI Symbol;Acc:MGI:107422]	Hspa4l	protein_coding	-0.437978	0.0031635	2.49983	0.0693979	1331	1617	1610	1958	3157	2238	1919.77	0.148397	-2.95139
ENSMUSG00000044768	DNA segment, Chr 1, ERATO Doi 622, expressed [Source:MGI Symbol;Acc:MGI:1277184]	D1Ertd622e	protein_coding	0.231664	0.00317472	2.49829	0.069551	2954	3758	3213	3013	3424	3101	3198.94	0.0785225	2.95029
ENSMUSG00000081281	predicted gene 6274 [Source:MGI Symbol;Acc:MGI:3645367]	Gm6274	processed_pseudogene	0.588017	0.00319143	2.49602	0.0698126	20	39	26	5	3	4	16.4776	0.199418	2.94867
ENSMUSG00000040649	ribosomal modification protein rimK-like family member B [Source:MGI Symbol;Acc:MGI:1918325]	Rimklb	protein_coding	-0.47096	0.00319518	2.4955	0.0698126	1491	1433	987	2017	2389	2099	1686.55	0.159739	-2.94831
ENSMUSG00000025580	eukaryotic translation initiation factor 4A3 [Source:MGI Symbol;Acc:MGI:1923731]	Eif4a3	protein_coding	0.269303	0.00319969	2.49489	0.069818	2551	3381	2759	2613	2944	2543	2759.87	0.0913549	2.94787
ENSMUSG00000017715	phosphatidylglycerophosphate synthase 1 [Source:MGI Symbol;Acc:MGI:1921701]	Pgs1	protein_coding	-0.259885	0.00322946	2.49087	0.070374	6701	9348	7683	9900	11081	11336	9103.21	0.088246	-2.94501
ENSMUSG00000078812	eukaryotic translation initiation factor 5A [Source:MGI Symbol;Acc:MGI:106248]	Eif5a	protein_coding	0.287244	0.00325396	2.48759	0.0708135	4199	6030	4426	4180	4732	4503	4607.42	0.0976135	2.94267
ENSMUSG00000021266	tryptophanyl-tRNA synthetase [Source:MGI Symbol;Acc:MGI:104630]	Wars	protein_coding	-0.273733	0.00326067	2.48669	0.0708656	1717	2252	1951	2532	3031	2621	2289.73	0.0930423	-2.94203
ENSMUSG00000050520	claudin 8 [Source:MGI Symbol;Acc:MGI:1859286]	Cldn8	protein_coding	-0.600954	0.00329226	2.48251	0.0714573	216	401	408	615	834	575	487.598	0.204472	-2.93904
ENSMUSG00000024048	myosin, light chain 12A, regulatory, non-sarcomeric [Source:MGI Symbol;Acc:MGI:1914518]	Myl12a	protein_coding	0.396264	0.00330199	2.48122	0.0715738	1793	1970	1416	1430	1536	1381	1575.28	0.13487	2.93813
ENSMUSG00000105452	predicted gene 5276 [Source:MGI Symbol;Acc:MGI:3646382]	Gm5276	processed_pseudogene	0.684159	0.0033353	2.47687	0.0722002	47	118	77	33	23	29	54.5326	0.233102	2.93502
ENSMUSG00000007458	mannose-6-phosphate receptor, cation dependent [Source:MGI Symbol;Acc:MGI:96904]	M6pr	protein_coding	0.473652	0.0033684	2.47258	0.0728206	1011	901	852	724	691	743	821.013	0.161548	2.93195
ENSMUSG00000104882	predicted gene 43096 [Source:MGI Symbol;Acc:MGI:5663233]	Gm43096	processed_pseudogene	0.678911	0.00337523	2.4717	0.0728722	97	125	111	53	73	45	84.2636	0.231606	2.93132
ENSMUSG00000030681	major vault protein [Source:MGI Symbol;Acc:MGI:1925638]	Mvp	protein_coding	-0.25073	0.00338856	2.46999	0.0730635	2554	3253	2915	3589	4388	3885	3344.63	0.0855706	-2.9301
ENSMUSG00000097271	predicted gene 9903 [Source:MGI Symbol;Acc:MGI:3646113]	Gm9903	protein_coding	-0.52462	0.00340984	2.46727	0.0734258	4	1	0	39	57	29	20.0079	0.179164	-2.92815
ENSMUSG00000036452	Rho GTPase activating protein 26 [Source:MGI Symbol;Acc:MGI:1918552]	Arhgap26	protein_coding	-0.335769	0.00342159	2.46577	0.0735822	1064	1305	995	1504	1836	1556	1338.7	0.114711	-2.92708
ENSMUSG00000101841	predicted gene 11993 [Source:MGI Symbol;Acc:MGI:3651126]	Gm11993	processed_pseudogene	0.443214	0.00342711	2.46507	0.0736042	1493	1655	1551	1351	1074	1326	1405.52	0.151444	2.92658
ENSMUSG00000051855	mesoderm specific transcript [Source:MGI Symbol;Acc:MGI:96968]	Mest	protein_coding	-0.305189	0.00346816	2.4599	0.0743884	2338	3369	2932	3835	4501	3879	3380.28	0.104414	-2.92287
ENSMUSG00000084115	predicted gene 13566 [Source:MGI Symbol;Acc:MGI:3649655]	Gm13566	processed_pseudogene	0.358839	0.00349407	2.45667	0.0748463	1206	1435	1401	1149	1145	1211	1248.51	0.122867	2.92056
ENSMUSG00000113061	predicted pseudogene 11361 [Source:MGI Symbol;Acc:MGI:3649931]	Gm11361	protein_coding	0.651639	0.00350191	2.45569	0.0749162	73	68	41	25	11	14	39.8072	0.223175	2.91986
ENSMUSG00000084292	predicted gene 13535 [Source:MGI Symbol;Acc:MGI:3651247]	Gm13535	processed_pseudogene	0.674741	0.00352037	2.45341	0.0751151	60	59	54	26	17	16	39.6151	0.231217	2.91822
ENSMUSG00000082120	predicted gene 15720 [Source:MGI Symbol;Acc:MGI:3783164]	Gm15720	processed_pseudogene	0.585088	0.00351621	2.45393	0.0751151	409	462	345	323	262	221	337.474	0.20047	2.91859
ENSMUSG00000110446	predicted gene, 18646 [Source:MGI Symbol;Acc:MGI:5010831]	Gm18646	processed_pseudogene	0.492157	0.00352534	2.4528	0.0751232	16	34	29	0	1	0	13.7495	0.168675	2.91778
ENSMUSG00000094622	predicted gene 3055 [Source:MGI Symbol;Acc:MGI:3809197]	Gm3055	protein_coding	0.522736	0.00353723	2.45134	0.0752787	46	28	29	4	0	2	19.3575	0.17922	2.91673
ENSMUSG00000036822	topoisomerase I binding, arginine/serine-rich [Source:MGI Symbol;Acc:MGI:2146189]	Topors	protein_coding	-0.463549	0.00354428	2.45047	0.0753309	1376	1480	1882	2253	3227	2406	2040.78	0.158961	-2.91611
ENSMUSG00000087598	zinc finger protein 111 [Source:MGI Symbol;Acc:MGI:1929114]	Zfp111	protein_coding	-0.395005	0.00356172	2.44834	0.0756036	667	705	619	989	1142	937	821.035	0.135528	-2.91458
ENSMUSG00000052192	predicted pseudogene 5963 [Source:MGI Symbol;Acc:MGI:3648418]	Gm5963	processed_pseudogene	0.675895	0.00357429	2.44681	0.0756874	199	141	165	106	79	75	130.204	0.231989	2.91348
ENSMUSG00000109909	predicted gene 45663 [Source:MGI Symbol;Acc:MGI:5791499]	Gm45663	TEC	0.607019	0.00357491	2.44673	0.0756874	30	36	28	7	4	7	19.2163	0.208352	2.91342
ENSMUSG00000014763	family with sequence similarity 120, member B [Source:MGI Symbol;Acc:MGI:1914794]	Fam120b	protein_coding	-0.638658	0.00360072	2.44361	0.0761356	285	763	324	1021	1040	821	676.411	0.219381	-2.91117
ENSMUSG00000043618	eukaryotic translation initiation factor 5A-like 3, pseudogene [Source:MGI Symbol;Acc:MGI:3643585]	Eif5al3-ps	processed_pseudogene	0.358016	0.00363407	2.43961	0.0767415	846	1136	894	797	907	785	883.336	0.123102	2.90829
ENSMUSG00000073838	Tu translation elongation factor, mitochondrial [Source:MGI Symbol;Acc:MGI:1923686]	Tufm	protein_coding	0.684446	0.0036788	2.43429	0.0774865	94	79	72	31	42	38	60.3042	0.235653	2.90447
ENSMUSG00000030660	phosphatidylinositol-4-phosphate 3-kinase catalytic subunit type 2 alpha [Source:MGI Symbol;Acc:MGI:1203729]	Pik3c2a	protein_coding	-0.586886	0.00367495	2.43475	0.0774865	355	619	738	882	1239	1205	807.654	0.20204	-2.90479
ENSMUSG00000039419	contactin associated protein-like 2 [Source:MGI Symbol;Acc:MGI:1914047]	Cntnap2	protein_coding	-0.679585	0.00371951	2.42951	0.0781806	20	62	50	125	210	103	89.205	0.234257	-2.90102
ENSMUSG00000052997	ubiquitin-like modifier activating enzyme 2 [Source:MGI Symbol;Acc:MGI:1858313]	Uba2	protein_coding	-0.380804	0.0037213	2.42931	0.0781806	1762	2319	2511	2980	3743	3291	2689.96	0.131272	-2.90087
ENSMUSG00000083482	predicted gene 14706 [Source:MGI Symbol;Acc:MGI:3646357]	Gm14706	processed_pseudogene	0.672808	0.0037395	2.42719	0.0783622	139	84	82	53	30	26	71.4997	0.232056	2.89934
ENSMUSG00000027531	inositol (myo)-1(or 4)-monophosphatase 1 [Source:MGI Symbol;Acc:MGI:1933158]	Impa1	protein_coding	-0.481759	0.00373934	2.4272	0.0783622	0	0	0	24	33	45	15.6641	0.166161	-2.89935
ENSMUSG00000068706	predicted pseudogene 10250 [Source:MGI Symbol;Acc:MGI:3642408]	Gm10250	processed_pseudogene	0.343686	0.00376404	2.42435	0.0787756	1163	1544	1138	1089	1192	1083	1186.72	0.118623	2.89729
ENSMUSG00000104777	predicted gene 4865 [Source:MGI Symbol;Acc:MGI:3647137]	Gm4865	processed_pseudogene	0.636661	0.00378973	2.42139	0.0792121	163	221	153	82	136	101	141.93	0.219906	2.89515
ENSMUSG00000058748	zinc finger protein 958 [Source:MGI Symbol;Acc:MGI:2385298]	Zfp958	protein_coding	-0.461197	0.0038115	2.4189	0.0795656	1610	1946	1824	3361	2380	3004	2300.58	0.159399	-2.89336
ENSMUSG00000100701	predicted gene, 19587 [Source:MGI Symbol;Acc:MGI:5011772]	Gm19587	processed_pseudogene	0.526227	0.00384835	2.41473	0.0802327	349	531	347	262	343	281	348.096	0.182064	2.89033
ENSMUSG00000091421	predicted gene 4202 [Source:MGI Symbol;Acc:MGI:3782379]	Gm4202	processed_pseudogene	0.2932	0.0038957	2.40941	0.0811166	1837	2177	1974	1641	2106	1764	1892.96	0.101577	2.88649
ENSMUSG00000043300	UDP-GalNAc:betaGlcNAc beta 1,3-galactosaminyltransferase, polypeptide 1 [Source:MGI Symbol;Acc:MGI:1349405]	B3galnt1	protein_coding	-0.483779	0.00390758	2.40809	0.0812576	332	489	447	640	687	795	547.646	0.167657	-2.88553
ENSMUSG00000056999	insulin degrading enzyme [Source:MGI Symbol;Acc:MGI:96412]	Ide	protein_coding	-0.293893	0.00391238	2.40756	0.0812576	2498	2614	2528	3348	4047	3422	3003.79	0.101865	-2.88514
ENSMUSG00000020038	cryptochrome 1 (photolyase-like) [Source:MGI Symbol;Acc:MGI:1270841]	Cry1	protein_coding	-0.289326	0.00394119	2.40437	0.0817523	5701	5875	6187	7681	9204	8200	6979.33	0.100362	-2.88283
ENSMUSG00000034435	transmembrane protein 30B [Source:MGI Symbol;Acc:MGI:2442082]	Tmem30b	protein_coding	-0.345383	0.00396714	2.40152	0.0821865	930	1293	949	1503	1659	1468	1263.7	0.119893	-2.88076
ENSMUSG00000002496	tuberous sclerosis 2 [Source:MGI Symbol;Acc:MGI:102548]	Tsc2	protein_coding	-0.45103	0.00402924	2.39478	0.0833675	408	650	501	750	855	905	656.288	0.156833	-2.87586
ENSMUSG00000039753	F-box and leucine-rich repeat protein 5 [Source:MGI Symbol;Acc:MGI:2152883]	Fbxl5	protein_coding	-0.301949	0.00403718	2.39392	0.0834265	2128	2658	2620	3117	3737	3649	2909.57	0.105017	-2.87524
ENSMUSG00000094865	predicted gene 7426 [Source:MGI Symbol;Acc:MGI:3647725]	Gm7426	processed_pseudogene	0.587691	0.00406403	2.39104	0.0838756	27	40	23	7	5	4	18.0406	0.204546	2.87315
ENSMUSG00000042377	family with sequence similarity 83, member G [Source:MGI Symbol;Acc:MGI:1916890]	Fam83g	protein_coding	-0.292552	0.00408578	2.38872	0.0842185	5668	8094	6034	7994	9862	9822	7689.11	0.101882	-2.87146
ENSMUSG00000004056	thymoma viral proto-oncogene 2 [Source:MGI Symbol;Acc:MGI:104874]	Akt2	protein_coding	0.644634	0.0040999	2.38723	0.0842974	118	158	115	67	72	83	102.192	0.224582	2.87037
ENSMUSG00000104781	predicted gene 43303 [Source:MGI Symbol;Acc:MGI:5663440]	Gm43303	lincRNA	-0.324063	0.00409865	2.38736	0.0842974	1962	2344	1851	2690	3513	2701	2440.27	0.112895	-2.87047
ENSMUSG00000084221	high mobility group box 1, pseudogene 4 [Source:MGI Symbol;Acc:MGI:3768540]	Hmgb1-ps4	processed_pseudogene	0.637328	0.00416514	2.38037	0.0854383	219	176	178	88	125	127	153.557	0.222424	2.86538
ENSMUSG00000035505	cytochrome c oxidase assembly protein 18 [Source:MGI Symbol;Acc:MGI:2448532]	Cox18	protein_coding	0.457287	0.00416581	2.3803	0.0854383	944	1019	808	714	653	811	822.131	0.159593	2.86532
ENSMUSG00000038563	elongation factor like GPTase 1 [Source:MGI Symbol;Acc:MGI:2141969]	Efl1	protein_coding	-0.358937	0.00419166	2.37761	0.0858609	665	731	721	1000	1113	1044	857.43	0.125355	-2.86337
ENSMUSG00000067121	predicted gene 7027 [Source:MGI Symbol;Acc:MGI:3644555]	Gm7027	processed_pseudogene	0.567673	0.00421542	2.37516	0.0862398	41	24	32	8	4	3	19.7096	0.198378	2.86157
ENSMUSG00000021112	membrane protein, palmitoylated 5 (MAGUK p55 subfamily member 5) [Source:MGI Symbol;Acc:MGI:1927339]	Mpp5	protein_coding	-0.472554	0.00423254	2.3734	0.0863744	809	1315	1298	1583	2293	1818	1465.79	0.165212	-2.86029
ENSMUSG00000028382	polypyrimidine tract binding protein 3 [Source:MGI Symbol;Acc:MGI:1923334]	Ptbp3	protein_coding	-0.413565	0.00423112	2.37354	0.0863744	670	846	775	1301	1167	1096	951.325	0.144583	-2.8604
ENSMUSG00000020413	HUS1 checkpoint clamp component [Source:MGI Symbol;Acc:MGI:1277962]	Hus1	protein_coding	-0.353123	0.00427316	2.36925	0.0870948	2595	2734	2565	3349	4829	3617	3190.47	0.123588	-2.85726
ENSMUSG00000081302	predicted gene 12020 [Source:MGI Symbol;Acc:MGI:3650978]	Gm12020	processed_pseudogene	0.476258	0.00428654	2.36789	0.0872591	814	862	927	596	860	575	768.138	0.166741	2.85627
ENSMUSG00000002477	small nuclear ribonucleoprotein D1 [Source:MGI Symbol;Acc:MGI:98344]	Snrpd1	protein_coding	0.396604	0.0042974	2.36679	0.0873716	1980	2185	1605	1543	1889	1416	1753.38	0.138893	2.85546
ENSMUSG00000001017	chromatin target of PRMT1 [Source:MGI Symbol;Acc:MGI:1913761]	Chtop	protein_coding	0.531221	0.00433722	2.36279	0.0880719	1483	1263	892	886	842	901	1047.53	0.186228	2.85253
ENSMUSG00000112099	predicted gene 8960 [Source:MGI Symbol;Acc:MGI:3642929]	Gm8960	processed_pseudogene	0.466827	0.0043484	2.36167	0.0881897	20	35	29	0	0	0	14.5246	0.163701	2.85172
ENSMUSG00000104788	predicted gene, 36448 [Source:MGI Symbol;Acc:MGI:5595607]	Gm36448	unprocessed_pseudogene	0.667841	0.0043567	2.36084	0.0882487	44	78	64	25	26	21	43.2435	0.234239	2.85111
ENSMUSG00000006423	RIKEN cDNA C330007P06 gene [Source:MGI Symbol;Acc:MGI:1924894]	C330007P06Rik	protein_coding	0.636831	0.0043735	2.35917	0.0883706	257	249	423	177	168	199	248.516	0.223458	2.84989
ENSMUSG00000106106	18s RNA, related sequence 5	CT010467.1	rRNA	0.588444	0.00437124	2.3594	0.0883706	4021	2398	3380	2462	2617	1487	2763.63	0.206468	2.85005
ENSMUSG00000022372	src-like adaptor [Source:MGI Symbol;Acc:MGI:104295]	Sla	protein_coding	-0.468184	0.00438822	2.35771	0.0885588	0	0	0	32	60	20	16.9743	0.164343	-2.84882
ENSMUSG00000006715	geminin [Source:MGI Symbol;Acc:MGI:1927344]	Gmnn	protein_coding	0.327198	0.00440321	2.35623	0.088752	1429	1886	1499	1461	1445	1358	1496.24	0.114898	2.84773
ENSMUSG00000010290	expressed sequence AI597479 [Source:MGI Symbol;Acc:MGI:2138299]	AI597479	protein_coding	0.380826	0.00441534	2.35504	0.0888873	889	898	858	708	806	747	812.882	0.133771	2.84686
ENSMUSG00000029994	annexin A4 [Source:MGI Symbol;Acc:MGI:88030]	Anxa4	protein_coding	-0.643175	0.0044255	2.35404	0.0889824	15	13	37	86	77	112	54.1477	0.225983	-2.84612
ENSMUSG00000037300	tetratricopeptide repeat domain 13 [Source:MGI Symbol;Acc:MGI:2384573]	Ttc13	protein_coding	-0.670502	0.00443113	2.35349	0.0889864	148	212	59	308	561	304	250.289	0.235618	-2.84572
ENSMUSG00000013701	translocase of inner mitochondrial membrane 23 [Source:MGI Symbol;Acc:MGI:1858317]	Timm23	protein_coding	0.665556	0.00448654	2.34809	0.0899889	89	144	77	55	25	38	71.8915	0.234206	2.84176
ENSMUSG00000022243	solute carrier family 45, member 2 [Source:MGI Symbol;Acc:MGI:2153040]	Slc45a2	protein_coding	-0.587901	0.00449722	2.34706	0.0900927	3	13	19	67	120	41	40.6367	0.206935	-2.841
ENSMUSG00000115911	predicted gene 3919 [Source:MGI Symbol;Acc:MGI:3782093]	Gm3919	processed_pseudogene	0.49059	0.00454295	2.34266	0.0908978	17	32	26	2	0	1	13.4248	0.172878	2.83777
ENSMUSG00000034055	phosphorylase kinase alpha 1 [Source:MGI Symbol;Acc:MGI:97576]	Phka1	protein_coding	-0.473663	0.00456602	2.34046	0.0912182	0	1	0	18	51	26	14.4715	0.167009	-2.83616
ENSMUSG00000007891	cathepsin D [Source:MGI Symbol;Acc:MGI:88562]	Ctsd	protein_coding	-0.462135	0.0045701	2.34007	0.0912182	361	503	470	710	682	791	569.673	0.16296	-2.83587
ENSMUSG00000035376	3-hydroxyacyl-CoA dehydratase 2 [Source:MGI Symbol;Acc:MGI:1918007]	Hacd2	protein_coding	0.471693	0.00460592	2.33668	0.0918214	822	943	941	757	595	733	797.716	0.166478	2.83338
ENSMUSG00000073542	centrosomal protein 76 [Source:MGI Symbol;Acc:MGI:1923401]	Cep76	protein_coding	-0.61153	0.00463416	2.33403	0.0922134	164	430	293	574	703	532	429.161	0.21598	-2.83142
ENSMUSG00000101834	predicted gene 5829 [Source:MGI Symbol;Acc:MGI:3644438]	Gm5829	processed_pseudogene	0.550421	0.00463684	2.33378	0.0922134	57	40	25	2	12	4	24.3083	0.19441	2.83124
ENSMUSG00000020280	pseudouridylate synthase 10 [Source:MGI Symbol;Acc:MGI:1921717]	Pus10	protein_coding	-0.65365	0.00467874	2.32987	0.0929092	18	66	30	90	202	113	80.4853	0.231106	-2.82836
ENSMUSG00000058258	isopentenyl-diphosphate delta isomerase [Source:MGI Symbol;Acc:MGI:2442264]	Idi1	protein_coding	0.627549	0.00468316	2.32946	0.0929092	44	55	37	18	11	9	29.6004	0.221901	2.82806
ENSMUSG00000030614	transmembrane protein 126B [Source:MGI Symbol;Acc:MGI:1915722]	Tmem126b	protein_coding	-0.644572	0.00470241	2.32768	0.0931782	153	127	87	319	230	302	197.006	0.228026	-2.82674
ENSMUSG00000079741	NLR family, pyrin domain containing 4G [Source:MGI Symbol;Acc:MGI:3700744]	Nlrp4g	transcribed_unprocessed_pseudogene	-0.263074	0.00475193	2.32313	0.0940457	7320	7883	6499	9334	10293	10229	8400.41	0.0931769	-2.82339
ENSMUSG00000050856	ATP synthase, H+ transporting, mitochondrial F1F0 complex, subunit E [Source:MGI Symbol;Acc:MGI:106636]	Atp5k	protein_coding	0.627774	0.00478346	2.32026	0.0942788	473	316	285	235	234	174	290.281	0.222515	2.82127
ENSMUSG00000110215	predicted gene 45598 [Source:MGI Symbol;Acc:MGI:5791434]	Gm45598	transcribed_unprocessed_pseudogene	0.598248	0.00479685	2.31904	0.0942788	66	39	29	10	7	14	28.7398	0.212117	2.82037
ENSMUSG00000115069	predicted gene 7382 [Source:MGI Symbol;Acc:MGI:3643745]	Gm7382	processed_pseudogene	0.50909	0.00478767	2.31988	0.0942788	18	28	33	4	1	1	14.7311	0.180466	2.82098
ENSMUSG00000107582	predicted gene, 44133 [Source:MGI Symbol;Acc:MGI:5690525]	Gm44133	transcribed_unprocessed_pseudogene	0.409421	0.00477992	2.32058	0.0942788	740	1125	976	682	869	789	852.548	0.145107	2.8215
ENSMUSG00000028851	nudC nuclear distribution protein [Source:MGI Symbol;Acc:MGI:106014]	Nudc	protein_coding	0.323567	0.00479467	2.31924	0.0942788	8503	10262	9027	7670	10240	7041	8679.3	0.114719	2.82051
ENSMUSG00000056076	eukaryotic translation initiation factor 3, subunit B [Source:MGI Symbol;Acc:MGI:106478]	Eif3b	protein_coding	-0.250079	0.00479823	2.31892	0.0942788	1727	2115	1925	2405	2837	2604	2214.21	0.0886716	-2.82028
ENSMUSG00000040675	methylenetetrahydrofolate dehydrogenase (NADP+ dependent) 1-like [Source:MGI Symbol;Acc:MGI:1924836]	Mthfd1l	protein_coding	-0.524407	0.00482036	2.31692	0.0946003	233	301	235	475	394	488	344.233	0.186039	-2.8188
ENSMUSG00000058064	predicted gene 10036 [Source:MGI Symbol;Acc:MGI:3642334]	Gm10036	processed_pseudogene	0.563962	0.00486044	2.31332	0.0951589	21	26	30	4	4	5	15.4997	0.200261	2.81614
ENSMUSG00000079316	RAB9, member RAS oncogene family [Source:MGI Symbol;Acc:MGI:1890695]	Rab9	protein_coding	0.543651	0.00485931	2.31343	0.0951589	361	425	486	297	360	243	361.309	0.193043	2.81621
ENSMUSG00000103071	predicted gene, 38110 [Source:MGI Symbol;Acc:MGI:5611338]	Gm38110	TEC	0.51009	0.00487477	2.31205	0.0953256	21	22	19	2	1	2	11.659	0.181192	2.81519
ENSMUSG00000109181	predicted gene 5605 [Source:MGI Symbol;Acc:MGI:3647902]	Gm5605	processed_pseudogene	0.46597	0.00489644	2.31012	0.0955213	18	27	25	0	1	0	12.3147	0.165603	2.81377
ENSMUSG00000029199	lipoic acid synthetase [Source:MGI Symbol;Acc:MGI:1934604]	Lias	protein_coding	-0.459419	0.00489607	2.31015	0.0955213	0	0	0	21	32	49	15.649	0.163274	-2.81379
ENSMUSG00000023110	protein arginine N-methyltransferase 5 [Source:MGI Symbol;Acc:MGI:1351645]	Prmt5	protein_coding	0.523935	0.00494783	2.30558	0.0964092	511	439	525	373	382	323	427.209	0.186427	2.81041
ENSMUSG00000028212	cyclin E2 [Source:MGI Symbol;Acc:MGI:1329034]	Ccne2	protein_coding	-0.512421	0.00500378	2.3007	0.097323	670	900	651	1534	1024	1275	982.775	0.182565	-2.80679
ENSMUSG00000020462	cilia and flagella associated protein 36 [Source:MGI Symbol;Acc:MGI:1913994]	Cfap36	protein_coding	-0.389564	0.00500661	2.30046	0.097323	485	600	571	835	924	776	679.683	0.138803	-2.80661
ENSMUSG00000092390	predicted gene 20541 [Source:MGI Symbol;Acc:MGI:5142006]	Gm20541	unprocessed_pseudogene	-0.609587	0.00504331	2.29728	0.0979202	142	122	159	322	253	313	212.67	0.217379	-2.80425
ENSMUSG00000029130	ring finger protein 32 [Source:MGI Symbol;Acc:MGI:1861747]	Rnf32	protein_coding	-0.439906	0.00504967	2.29674	0.0979277	550	854	717	1126	1039	1211	889.935	0.156894	-2.80385
ENSMUSG00000059070	ribosomal protein L18 [Source:MGI Symbol;Acc:MGI:98003]	Rpl18	protein_coding	0.659665	0.00505585	2.29621	0.0979316	77	79	81	39	35	39	59.155	0.235304	2.80345
ENSMUSG00000106390	predicted gene 5551 [Source:MGI Symbol;Acc:MGI:3642937]	Gm5551	processed_pseudogene	0.621949	0.00513429	2.28952	0.0993336	35	53	45	9	20	10	28.992	0.222245	2.79849
ENSMUSG00000032002	DCN1, defective in cullin neddylation 1, domain containing 5 (S. cerevisiae) [Source:MGI Symbol;Acc:MGI:1924113]	Dcun1d5	protein_coding	-0.365964	0.00514675	2.28847	0.0994573	2213	3013	2289	4078	3437	3613	3030.23	0.130809	-2.7977
ENSMUSG00000107879	RIKEN cDNA 9330102E08 gene [Source:MGI Symbol;Acc:MGI:3026973]	9330102E08Rik	lincRNA	-0.304984	0.00516604	2.28684	0.0997125	1154	1334	1204	1620	2007	1637	1454.41	0.109059	-2.79649
ENSMUSG00000085079	KH domain containing 1B [Source:MGI Symbol;Acc:MGI:2138477]	Khdc1b	protein_coding	0.205594	0.00518075	2.28561	0.0998787	24039	30661	27742	26365	28623	25740	26823.9	0.0735427	2.79557
ENSMUSG00000036934	RIKEN cDNA 4921524J17 gene [Source:MGI Symbol;Acc:MGI:1913964]	4921524J17Rik	protein_coding	0.324962	0.00527576	2.27772	0.101591	3009	3337	2763	2576	3196	2391	2847.59	0.116487	2.7897
ENSMUSG00000084018	predicted gene 11895 [Source:MGI Symbol;Acc:MGI:3651868]	Gm11895	processed_pseudogene	0.657369	0.00529444	2.27618	0.101831	75	90	59	34	38	30	54.7187	0.235738	2.78855
ENSMUSG00000026171	ring finger protein 25 [Source:MGI Symbol;Acc:MGI:1890215]	Rnf25	protein_coding	-0.285069	0.00530586	2.27524	0.101931	2179	2593	1949	2940	3404	3044	2616.84	0.102254	-2.78785
ENSMUSG00000113749	mRNA turnover 4, pseudogene 1 [Source:MGI Symbol;Acc:MGI:3644169]	Mrto4-ps1	processed_pseudogene	0.510754	0.00531708	2.27433	0.102027	29	25	17	1	4	2	13.557	0.183252	2.78717
ENSMUSG00000023027	activating transcription factor 1 [Source:MGI Symbol;Acc:MGI:1298366]	Atf1	protein_coding	0.544634	0.00532822	2.27342	0.102121	645	1260	1253	703	859	631	883.136	0.195455	2.78649
ENSMUSG00000089814	predicted gene 15310 [Source:MGI Symbol;Acc:MGI:3708111]	Gm15310	transcribed_processed_pseudogene	0.482273	0.00534096	2.27238	0.102129	23	30	22	0	3	1	13.6353	0.173124	2.78572
ENSMUSG00000056487	methyltransferase like 7A2 [Source:MGI Symbol;Acc:MGI:3026615]	Mettl7a2	protein_coding	0.436144	0.00534107	2.27237	0.102129	462	546	475	397	442	353	442.714	0.156565	2.78571
ENSMUSG00000045693	NLR family, pyrin domain containing 4E [Source:MGI Symbol;Acc:MGI:3056600]	Nlrp4e	protein_coding	0.466514	0.00538326	2.26895	0.102815	2034	1495	1741	1289	1529	1347	1576.57	0.16762	2.78316
ENSMUSG00000029863	caspase 2 [Source:MGI Symbol;Acc:MGI:97295]	Casp2	protein_coding	-0.485633	0.005391	2.26833	0.102843	328	317	374	554	578	610	448.347	0.174519	-2.78269
ENSMUSG00000023025	La ribonucleoprotein domain family, member 4 [Source:MGI Symbol;Acc:MGI:2443114]	Larp4	protein_coding	0.472689	0.00540827	2.26694	0.103	981	1362	1457	794	1248	907	1113.71	0.169931	2.78165
ENSMUSG00000074059	F-box and WD-40 domain protein 18 [Source:MGI Symbol;Acc:MGI:3505704]	Fbxw18	protein_coding	-0.377899	0.00541805	2.26616	0.103	10536	14893	11111	19480	15443	19645	14808.7	0.135883	-2.78107
ENSMUSG00000022387	bromodomain containing 1 [Source:MGI Symbol;Acc:MGI:1924161]	Brd1	protein_coding	-0.354706	0.00541562	2.26635	0.103	2903	3232	3485	3878	5615	4912	3894.22	0.127536	-2.78121
ENSMUSG00000097145	RIKEN cDNA 9230114K14 gene [Source:MGI Symbol;Acc:MGI:3041212]	9230114K14Rik	processed_transcript	-0.645185	0.00543535	2.26477	0.103089	16	29	48	125	108	87	65.7981	0.232078	-2.78003
ENSMUSG00000035597	pre-mRNA processing factor 39 [Source:MGI Symbol;Acc:MGI:104602]	Prpf39	protein_coding	0.469966	0.00542963	2.26523	0.103089	727	850	825	712	624	516	707.184	0.16903	2.78037
ENSMUSG00000085572	predicted gene 16234 [Source:MGI Symbol;Acc:MGI:3801867]	Gm16234	antisense	0.618966	0.00546143	2.26269	0.103365	40	42	48	14	17	8	28.8521	0.222772	2.77848
ENSMUSG00000108249	predicted gene, 43960 [Source:MGI Symbol;Acc:MGI:5690352]	Gm43960	processed_pseudogene	0.534875	0.00546679	2.26227	0.103365	26	27	19	4	4	2	14.1514	0.192529	2.77816
ENSMUSG00000009894	synaptosomal-associated protein, 47 [Source:MGI Symbol;Acc:MGI:1915076]	Snap47	protein_coding	-0.306119	0.00546882	2.26211	0.103365	2181	2811	1972	3199	3472	3183	2729.24	0.110193	-2.77804
ENSMUSG00000024205	ribosomal protein L36, pseudogene 2 [Source:MGI Symbol;Acc:MGI:3650081]	Rpl36-ps2	processed_pseudogene	0.591334	0.00552312	2.25782	0.104271	51	34	33	6	9	14	25.4549	0.213107	2.77483
ENSMUSG00000028560	ubiquitin specific peptidase 1 [Source:MGI Symbol;Acc:MGI:2385198]	Usp1	protein_coding	0.302708	0.00553872	2.25659	0.104445	2030	2248	2237	1909	1980	2043	2057.65	0.109127	2.77391
ENSMUSG00000027698	neutral cholesterol ester hydrolase 1 [Source:MGI Symbol;Acc:MGI:2443191]	Nceh1	protein_coding	-0.278881	0.00555009	2.2557	0.10454	2795	3915	3159	4185	4599	4863	3817.96	0.100561	-2.77324
ENSMUSG00000016626	NLR family, pyrin domain containing 14 [Source:MGI Symbol;Acc:MGI:1924108]	Nlrp14	protein_coding	-0.284197	0.00560117	2.25172	0.105381	80151	99345	92890	123717	117760	137534	106168	0.102589	-2.77026
ENSMUSG00000061374	Flt3 interacting zinc finger protein 1 [Source:MGI Symbol;Acc:MGI:1344336]	Fiz1	protein_coding	-0.396625	0.00563928	2.24878	0.105976	1246	2063	1594	2099	2989	2439	2000.44	0.143287	-2.76805
ENSMUSG00000078495	zinc finger protein 984 [Source:MGI Symbol;Acc:MGI:3651978]	Zfp984	protein_coding	0.628179	0.00565075	2.24789	0.10607	207	185	148	121	89	98	142.983	0.226994	2.76739
ENSMUSG00000102915	predicted gene, 32460 [Source:MGI Symbol;Acc:MGI:5591619]	Gm32460	processed_pseudogene	0.636681	0.00567067	2.24637	0.106322	124	150	141	89	84	54	107.629	0.230161	2.76624
ENSMUSG00000058446	zinc and ring finger 2 [Source:MGI Symbol;Acc:MGI:1196246]	Znrf2	protein_coding	-0.284161	0.00569419	2.24457	0.106641	4467	4512	4326	6220	6411	6029	5216.46	0.102775	-2.76489
ENSMUSG00000043289	meiotic double-stranded break formation protein 4 [Source:MGI Symbol;Acc:MGI:1922283]	Mei4	protein_coding	-0.484658	0.00571102	2.24329	0.106834	424	567	422	912	707	751	613.507	0.175351	-2.76393
ENSMUSG00000029730	minichromosome maintenance complex component 7 [Source:MGI Symbol;Acc:MGI:1298398]	Mcm7	protein_coding	0.397568	0.00571887	2.24269	0.106859	1009	1025	899	838	794	819	893.785	0.143865	2.76348
ENSMUSG00000025201	biogenesis of lysosomal organelles complex-1, subunit 2, pseudogene [Source:MGI Symbol;Acc:MGI:3702045]	Bloc1s2-ps	processed_pseudogene	0.635587	0.00575011	2.24032	0.10732	118	157	90	62	71	66	93.9059	0.230143	2.7617
ENSMUSG00000027193	apoptosis inhibitor 5 [Source:MGI Symbol;Acc:MGI:1888993]	Api5	protein_coding	0.374181	0.00576078	2.23952	0.107397	2117	2636	2930	2022	2191	2351	2356.92	0.135519	2.7611
ENSMUSG00000020022	NADH:ubiquinone oxidoreductase subunit A12 [Source:MGI Symbol;Acc:MGI:1913664]	Ndufa12	protein_coding	0.611883	0.00577624	2.23836	0.107563	180	253	208	120	175	92	170.564	0.221679	2.76022
ENSMUSG00000061462	obscurin, cytoskeletal calmodulin and titin-interacting RhoGEF [Source:MGI Symbol;Acc:MGI:2681862]	Obscn	protein_coding	-0.509572	0.00587877	2.23071	0.109224	371	635	605	788	931	1090	711.597	0.184998	-2.75447
ENSMUSG00000041765	ubiquitin associated domain containing 2 [Source:MGI Symbol;Acc:MGI:1916139]	Ubac2	protein_coding	-0.206007	0.00587786	2.23078	0.109224	3467	4260	3782	4859	5306	4950	4338.4	0.0747889	-2.75452
ENSMUSG00000008668	ribosomal protein S18 [Source:MGI Symbol;Acc:MGI:98146]	Rps18	protein_coding	0.59823	0.00592251	2.22749	0.109788	61	81	52	18	6	27	41.6898	0.217377	2.75204
ENSMUSG00000113914	predicted gene, 48458 [Source:MGI Symbol;Acc:MGI:6097972]	Gm48458	processed_pseudogene	0.538765	0.00592022	2.22766	0.109788	27	42	15	5	4	4	16.432	0.19576	2.75217
ENSMUSG00000010453	KAT8 regulatory NSL complex subunit 3 [Source:MGI Symbol;Acc:MGI:1918055]	Kansl3	protein_coding	-0.556469	0.00594248	2.22603	0.110033	266	565	527	749	1000	797	624.559	0.202283	-2.75094
ENSMUSG00000051510	v-maf musculoaponeurotic fibrosarcoma oncogene family, protein G (avian) [Source:MGI Symbol;Acc:MGI:96911]	Mafg	protein_coding	-0.51196	0.00596299	2.22454	0.110288	326	483	457	620	984	637	562.228	0.18618	-2.74981
ENSMUSG00000016528	MAP kinase-activated protein kinase 2 [Source:MGI Symbol;Acc:MGI:109298]	Mapkapk2	protein_coding	-0.603729	0.00598066	2.22325	0.110491	7	34	43	144	160	73	72.3702	0.21963	-2.74884
ENSMUSG00000029685	ankyrin repeat and SOCS box-containing 15 [Source:MGI Symbol;Acc:MGI:1926160]	Asb15	protein_coding	0.602032	0.00601561	2.22072	0.111011	202	189	267	131	130	148	179.495	0.219165	2.74693
ENSMUSG00000091971	heat shock protein 1A [Source:MGI Symbol;Acc:MGI:96244]	Hspa1a	protein_coding	0.604892	0.00603631	2.21923	0.111268	25	46	55	11	13	12	27.4375	0.220297	2.7458
ENSMUSG00000003721	insulin induced gene 2 [Source:MGI Symbol;Acc:MGI:1920249]	Insig2	protein_coding	0.600685	0.00605205	2.2181	0.111432	207	165	199	116	132	110	156.318	0.218833	2.74495
ENSMUSG00000062588	predicted gene 6104 [Source:MGI Symbol;Acc:MGI:3648587]	Gm6104	processed_pseudogene	0.602437	0.00611232	2.21379	0.112364	124	172	168	92	110	83	124.679	0.219732	2.74169
ENSMUSG00000078126	ribosomal protein L23A, pseudogene 3 [Source:MGI Symbol;Acc:MGI:3781353]	Rpl23a-ps3	processed_pseudogene	0.448095	0.00612105	2.21317	0.112364	22	27	18	0	0	1	11.8214	0.163465	2.74123
ENSMUSG00000002833	HDGF like 2 [Source:MGI Symbol;Acc:MGI:1194492]	Hdgfl2	protein_coding	-0.308185	0.00612882	2.21262	0.112364	984	1114	1056	1355	1692	1469	1246.06	0.112443	-2.74081
ENSMUSG00000045007	tubulin, gamma 2 [Source:MGI Symbol;Acc:MGI:2144208]	Tubg2	protein_coding	0.261474	0.00613007	2.21253	0.112364	2491	3400	2801	2415	3017	2719	2764.31	0.0954025	2.74074
ENSMUSG00000105857	predicted gene 42817 [Source:MGI Symbol;Acc:MGI:5662954]	Gm42817	antisense	-0.343539	0.00620765	2.20707	0.113659	1407	1773	1318	2320	2214	2033	1797.85	0.125535	-2.73661
ENSMUSG00000112880	predicted gene, 20337 [Source:MGI Symbol;Acc:MGI:5012522]	Gm20337	bidirectional_promoter_lncRNA	-0.618681	0.00623848	2.20492	0.114096	19	13	22	53	114	53	42.9344	0.226211	-2.73498
ENSMUSG00000019777	histone deacetylase 2 [Source:MGI Symbol;Acc:MGI:1097691]	Hdac2	protein_coding	-0.263615	0.00628633	2.2016	0.114843	2173	2995	2374	3276	3497	3531	2899.46	0.0964755	-2.73246
ENSMUSG00000097207	RIKEN cDNA 6030443J06 gene [Source:MGI Symbol;Acc:MGI:2444595]	6030443J06Rik	lincRNA	-0.599996	0.0063585	2.19665	0.115925	22	33	34	176	37	174	76.7072	0.219884	-2.7287
ENSMUSG00000020255	DNA segment, Chr 10, Wayne State University 102, expressed [Source:MGI Symbol;Acc:MGI:106381]	D10Wsu102e	protein_coding	-0.191539	0.00635973	2.19656	0.115925	25091	32995	26779	33002	39539	37597	31711.8	0.0701959	-2.72863
ENSMUSG00000054099	solute carrier family 25, member 40 [Source:MGI Symbol;Acc:MGI:2442486]	Slc25a40	protein_coding	-0.600099	0.00640774	2.1933	0.116671	92	153	156	232	366	245	198.334	0.220127	-2.72615
ENSMUSG00000026626	protein phosphatase 2, regulatory subunit B', alpha [Source:MGI Symbol;Acc:MGI:2388479]	Ppp2r5a	protein_coding	0.446028	0.00645966	2.18979	0.117406	611	642	500	405	488	501	521.522	0.163771	2.72349
ENSMUSG00000040396	abhydrolase domain containing 13 [Source:MGI Symbol;Acc:MGI:1916154]	Abhd13	protein_coding	-0.230904	0.00646248	2.1896	0.117406	5659	6883	6446	8061	8536	8819	7237.95	0.0847868	-2.72334
ENSMUSG00000094157	predicted gene 7995 [Source:MGI Symbol;Acc:MGI:3779776]	Gm7995	protein_coding	0.568496	0.00649137	2.18766	0.117801	31	33	24	7	8	5	18.4787	0.208862	2.72187
ENSMUSG00000067219	NIPA-like domain containing 1 [Source:MGI Symbol;Acc:MGI:1917951]	Nipal1	protein_coding	0.533668	0.00650734	2.1866	0.11796	182	25	61	13	8	26	56.9692	0.196125	2.72106
ENSMUSG00000023286	ubiquitin-conjugating enzyme E2J 2 [Source:MGI Symbol;Acc:MGI:2153608]	Ube2j2	protein_coding	0.532399	0.00655143	2.18366	0.118628	380	372	338	204	334	243	310.867	0.195819	2.71882
ENSMUSG00000057219	armadillo repeat containing 7 [Source:MGI Symbol;Acc:MGI:2679719]	Armc7	protein_coding	0.459643	0.006579	2.18184	0.118996	804	1451	1098	764	842	974	975.991	0.169146	2.71744
ENSMUSG00000031604	methylsterol monoxygenase 1 [Source:MGI Symbol;Acc:MGI:1913484]	Msmo1	protein_coding	-0.491607	0.0066112	2.17972	0.119446	353	553	313	616	717	739	529.044	0.181016	-2.71582
ENSMUSG00000049562	adaptor-related protein complex 5, beta 1 subunit [Source:MGI Symbol;Acc:MGI:2685808]	Ap5b1	protein_coding	-0.432986	0.00667861	2.17531	0.120531	0	0	0	18	67	27	16.7689	0.159629	-2.71246
ENSMUSG00000030291	mediator complex subunit 21 [Source:MGI Symbol;Acc:MGI:1347064]	Med21	protein_coding	-0.530217	0.00668617	2.17482	0.120535	1478	1674	1334	3523	1876	2640	2041.94	0.195502	-2.71208
ENSMUSG00000026112	cytochrome C oxidase assembly factor 5 [Source:MGI Symbol;Acc:MGI:1923428]	Coa5	protein_coding	-0.498202	0.00671307	2.17308	0.120887	278	405	247	561	541	493	407.212	0.183787	-2.71075
ENSMUSG00000026229	proteasome (prosome, macropain) 26S subunit, non-ATPase, 1 [Source:MGI Symbol;Acc:MGI:1917497]	Psmd1	protein_coding	-0.236829	0.00672561	2.17227	0.12098	3049	3546	3340	4376	4574	4425	3801.37	0.0873866	-2.71013
ENSMUSG00000030095	transmembrane protein 43 [Source:MGI Symbol;Acc:MGI:1921372]	Tmem43	protein_coding	-0.625805	0.00682089	2.16616	0.122545	109	282	106	332	473	335	258.393	0.231312	-2.70546
ENSMUSG00000028073	platelet endothelial aggregation receptor 1 [Source:MGI Symbol;Acc:MGI:1920432]	Pear1	protein_coding	-0.624913	0.00682756	2.16573	0.122545	27	25	29	59	160	69	57.6749	0.23101	-2.70514
ENSMUSG00000032042	signal recognition particle receptor ('docking protein') [Source:MGI Symbol;Acc:MGI:1914648]	Srpr	protein_coding	0.568761	0.00684779	2.16445	0.122773	476	459	414	229	260	405	375.128	0.210328	2.70416
ENSMUSG00000019039	DALR anticodon binding domain containing 3 [Source:MGI Symbol;Acc:MGI:1915039]	Dalrd3	protein_coding	-0.487155	0.00689922	2.1612	0.12356	231	294	225	341	486	459	327.671	0.180316	-2.70167
ENSMUSG00000024560	CXXC finger 1 (PHD domain) [Source:MGI Symbol;Acc:MGI:1921572]	Cxxc1	protein_coding	-0.287033	0.00690914	2.16058	0.123603	1255	1396	1334	1746	2078	1783	1560.42	0.106262	-2.70119
ENSMUSG00000027692	TRAF2 and NCK interacting kinase [Source:MGI Symbol;Acc:MGI:1916264]	Tnik	protein_coding	-0.57768	0.00694	2.15864	0.124019	7	49	72	123	365	153	118.38	0.213978	-2.69971
ENSMUSG00000113861	predicted gene 6190 [Source:MGI Symbol;Acc:MGI:3643523]	Gm6190	processed_pseudogene	0.629952	0.00700652	2.1545	0.125014	108	153	97	57	50	78	90.6687	0.233616	2.69653
ENSMUSG00000031791	transmembrane protein 38A [Source:MGI Symbol;Acc:MGI:1921416]	Tmem38a	protein_coding	-0.515651	0.00701089	2.15423	0.125014	336	487	613	847	884	826	645.237	0.191242	-2.69633
ENSMUSG00000020198	adaptor-related protein complex 3, delta 1 subunit [Source:MGI Symbol;Acc:MGI:107734]	Ap3d1	protein_coding	-0.483177	0.00706271	2.15103	0.125801	683	1089	1037	1238	2124	1444	1220.3	0.179362	-2.69387
ENSMUSG00000082241	G protein subunit gamma 5, pseudogene [Source:MGI Symbol;Acc:MGI:3783217]	Gng5-ps	processed_pseudogene	0.459411	0.0070714	2.15049	0.125819	28	26	22	3	0	1	14.0262	0.170565	2.69346
ENSMUSG00000015568	lipoprotein lipase [Source:MGI Symbol;Acc:MGI:96820]	Lpl	protein_coding	0.346189	0.00708058	2.14993	0.125845	1046	1199	940	867	1056	868	985.404	0.12855	2.69303
ENSMUSG00000111336	aldolase A, pseudogene 4 [Source:MGI Symbol;Acc:MGI:3643617]	Aldoa-ps4	processed_pseudogene	0.523787	0.00730449	2.13641	0.129684	25	45	23	7	2	6	18.3187	0.195251	2.68263
ENSMUSG00000028007	sorting nexin 7 [Source:MGI Symbol;Acc:MGI:1923811]	Snx7	protein_coding	-0.60932	0.0073539	2.13348	0.130279	10	27	39	79	125	80	56.5185	0.227326	-2.68038
ENSMUSG00000113805	predicted pseudogene 5788 [Source:MGI Symbol;Acc:MGI:3647569]	Gm5788	protein_coding	0.432679	0.00735279	2.13355	0.130279	24	21	19	0	0	1	11.448	0.161421	2.68043
ENSMUSG00000068240	predicted gene 11808 [Source:MGI Symbol;Acc:MGI:3649356]	Gm11808	protein_coding	0.583197	0.0073637	2.1329	0.130312	40	42	40	17	9	8	26.7466	0.217616	2.67993
ENSMUSG00000040025	YTH N6-methyladenosine RNA binding protein 2 [Source:MGI Symbol;Acc:MGI:2444233]	Ythdf2	protein_coding	0.350766	0.00738099	2.13189	0.130348	2039	2506	2626	1722	2339	2215	2217.64	0.130924	2.67915
ENSMUSG00000042992	BLOC-1 related complex subunit 5 [Source:MGI Symbol;Acc:MGI:1915024]	Borcs5	protein_coding	-0.304085	0.00738164	2.13185	0.130348	1813	2555	1939	3051	3090	2752	2467.1	0.113502	-2.67912
ENSMUSG00000020397	mediator complex subunit 7 [Source:MGI Symbol;Acc:MGI:1913463]	Med7	protein_coding	-0.292947	0.00746425	2.12701	0.131665	1302	1760	1327	2022	2184	1941	1709.94	0.109497	-2.67539
ENSMUSG00000032458	coatomer protein complex, subunit beta 2 (beta prime) [Source:MGI Symbol;Acc:MGI:1354962]	Copb2	protein_coding	-0.286087	0.00751373	2.12414	0.132395	3215	3725	3805	4328	5732	5080	4205.29	0.107021	-2.67317
ENSMUSG00000028207	aspartate-beta-hydroxylase [Source:MGI Symbol;Acc:MGI:1914186]	Asph	protein_coding	-0.335432	0.00752316	2.1236	0.132419	1044	1340	1344	1639	2085	1736	1489.41	0.125501	-2.67275
ENSMUSG00000062353	predicted gene 15772 [Source:MGI Symbol;Acc:MGI:3805541]	Gm15772	processed_pseudogene	0.529493	0.00756102	2.12142	0.132933	31	18	31	4	5	6	16.6387	0.198233	2.67107
ENSMUSG00000020828	phospholipase D2 [Source:MGI Symbol;Acc:MGI:892877]	Pld2	protein_coding	-0.418568	0.00757638	2.12054	0.132933	768	1427	991	1571	1775	1625	1313.51	0.156744	-2.67039
ENSMUSG00000028333	acidic (leucine-rich) nuclear phosphoprotein 32 family, member B [Source:MGI Symbol;Acc:MGI:1914878]	Anp32b	protein_coding	0.371739	0.0075767	2.12052	0.132933	2787	3500	3160	2186	3512	2428	2889.71	0.139209	2.67037
ENSMUSG00000082051	predicted gene 16072 [Source:MGI Symbol;Acc:MGI:3801776]	Gm16072	processed_pseudogene	0.419417	0.0075898	2.11977	0.13302	585	694	571	472	605	433	554.778	0.157097	2.66979
ENSMUSG00000059981	TAO kinase 2 [Source:MGI Symbol;Acc:MGI:1915919]	Taok2	protein_coding	-0.534581	0.00762925	2.11752	0.133569	539	1127	1173	1379	2014	1819	1288.94	0.200364	-2.66805
ENSMUSG00000001348	acid phosphatase 5, tartrate resistant [Source:MGI Symbol;Acc:MGI:87883]	Acp5	protein_coding	-0.626498	0.00764077	2.11686	0.133628	46	155	89	221	225	266	158.943	0.234859	-2.66754
ENSMUSG00000027784	protein phosphatase 1 (formerly 2C)-like [Source:MGI Symbol;Acc:MGI:2139740]	Ppm1l	protein_coding	-0.533712	0.00765356	2.11614	0.133709	323	463	398	569	1050	579	539.959	0.200118	-2.66698
ENSMUSG00000038770	karyopherin alpha 7 (importin alpha 8) [Source:MGI Symbol;Acc:MGI:2141165]	Kpna7	protein_coding	-0.207355	0.00766946	2.11524	0.133844	12251	15911	13433	17154	18310	19076	15656.8	0.0777692	-2.66629
ENSMUSG00000065990	aurora kinase A interacting protein 1 [Source:MGI Symbol;Acc:MGI:1913327]	Aurkaip1	protein_coding	-0.344675	0.00770524	2.11321	0.134325	764	1063	779	1252	1391	1173	1039.91	0.129348	-2.66472
ENSMUSG00000056752	dynein, axonemal, heavy chain 9 [Source:MGI Symbol;Acc:MGI:1289279]	Dnah9	protein_coding	-0.56443	0.00772617	2.11204	0.134547	221	484	288	456	784	679	462.637	0.211889	-2.66381
ENSMUSG00000116562	ribosomal protein S27-like (Rps27i) pseudogene	AC139060.1	processed_pseudogene	0.606864	0.0077913	2.10839	0.135393	89	63	71	41	18	20	52.0736	0.22806	2.66098
ENSMUSG00000067745	predicted gene 14243 [Source:MGI Symbol;Acc:MGI:3651252]	Gm14243	lincRNA	0.488036	0.00778321	2.10884	0.135393	61	64	48	8	0	12	33.4825	0.18338	2.66133
ENSMUSG00000101078	olfactory receptor 1166 [Source:MGI Symbol;Acc:MGI:3031000]	Olfr1166	protein_coding	0.477685	0.00780894	2.10741	0.135556	37	33	41	5	0	6	21.3793	0.179566	2.66022
ENSMUSG00000019732	calreticulin 3 [Source:MGI Symbol;Acc:MGI:1920566]	Calr3	protein_coding	-0.393006	0.00783196	2.10613	0.135812	805	1282	1076	1343	1900	1621	1293.26	0.147789	-2.65923
ENSMUSG00000021741	predicted pseudogene 5457 [Source:MGI Symbol;Acc:MGI:3646665]	Gm5457	processed_pseudogene	0.466066	0.0079706	2.09851	0.13807	20	23	16	1	3	1	11.0489	0.175654	2.65331
ENSMUSG00000038600	ATPase, H+ transporting, lysosomal V0 subunit A4 [Source:MGI Symbol;Acc:MGI:2153480]	Atp6v0a4	protein_coding	-0.564359	0.00799448	2.09721	0.138192	4	40	26	83	169	86	62.9558	0.212781	-2.6523
ENSMUSG00000075132	olfactory receptor 1173 [Source:MGI Symbol;Acc:MGI:3031007]	Olfr1173	protein_coding	0.497454	0.00798634	2.09765	0.138192	54	21	26	8	2	4	20.502	0.187531	2.65265
ENSMUSG00000022420	dynein, axonemal, light chain 4 [Source:MGI Symbol;Acc:MGI:1859217]	Dnal4	protein_coding	-0.31199	0.00804381	2.09454	0.138898	2194	2527	2032	3407	3146	3076	2668.99	0.117722	-2.65023
ENSMUSG00000013584	aldehyde dehydrogenase family 1, subfamily A2 [Source:MGI Symbol;Acc:MGI:107928]	Aldh1a2	protein_coding	-0.446916	0.00808504	2.09232	0.13917	1123	1297	1029	2046	2227	1369	1470.94	0.168743	-2.6485
ENSMUSG00000017210	mediator complex subunit 24 [Source:MGI Symbol;Acc:MGI:1344385]	Med24	protein_coding	-0.439588	0.00808473	2.09233	0.13917	747	1005	1075	1318	1961	1335	1199.07	0.165976	-2.64851
ENSMUSG00000034087	NLR family, pyrin domain containing 4B [Source:MGI Symbol;Acc:MGI:3056570]	Nlrp4b	protein_coding	-0.356538	0.00807648	2.09278	0.13917	8793	10030	8816	14371	11440	15105	11184	0.134601	-2.64886
ENSMUSG00000055421	protocadherin 9 [Source:MGI Symbol;Acc:MGI:1306801]	Pcdh9	protein_coding	-0.287115	0.00815557	2.08855	0.140236	1886	2030	2025	2480	3184	2725	2330.31	0.108527	-2.64556
ENSMUSG00000111027	predicted gene 2981 [Source:MGI Symbol;Acc:MGI:3781159]	Gm2981	processed_pseudogene	0.543966	0.00829691	2.08108	0.141936	256	325	367	177	211	261	265.839	0.206068	2.63974
ENSMUSG00000029521	checkpoint kinase 2 [Source:MGI Symbol;Acc:MGI:1355321]	Chek2	protein_coding	-0.467098	0.00827614	2.08217	0.141936	0	15	3	58	135	44	38.6224	0.176891	-2.64059
ENSMUSG00000040297	SUN domain containing ossification factor [Source:MGI Symbol;Acc:MGI:2138346]	Suco	protein_coding	-0.449842	0.00829769	2.08104	0.141936	1373	1627	2259	2561	3377	2780	2261.56	0.170414	-2.63971
ENSMUSG00000081272	predicted gene 13509 [Source:MGI Symbol;Acc:MGI:3649640]	Gm13509	processed_pseudogene	0.432017	0.00827021	2.08248	0.141936	654	831	867	577	591	714	701.748	0.163591	2.64083
ENSMUSG00000026271	G protein-coupled receptor 35 [Source:MGI Symbol;Acc:MGI:1929509]	Gpr35	protein_coding	-0.323807	0.00828737	2.08158	0.141936	1439	2079	1695	2228	2990	2311	2059.47	0.122648	-2.64013
ENSMUSG00000001127	Araf proto-oncogene, serine/threonine kinase [Source:MGI Symbol;Acc:MGI:88065]	Araf	protein_coding	0.480095	0.00834176	2.07874	0.142411	444	681	693	463	430	470	527.087	0.181998	2.63791
ENSMUSG00000082491	predicted gene 5909 [Source:MGI Symbol;Acc:MGI:3646686]	Gm5909	processed_pseudogene	0.400235	0.00834287	2.07868	0.142411	887	907	735	645	821	645	767.612	0.151727	2.63787
ENSMUSG00000024900	carnitine palmitoyltransferase 1a, liver [Source:MGI Symbol;Acc:MGI:1098296]	Cpt1a	protein_coding	0.474627	0.00841377	2.07501	0.143472	19	49	54	1	2	10	23.0487	0.180124	2.635
ENSMUSG00000081400	predicted gene 13680 [Source:MGI Symbol;Acc:MGI:3652285]	Gm13680	processed_pseudogene	0.60025	0.00842324	2.07452	0.143484	77	75	40	25	15	28	44.2285	0.227832	2.63462
ENSMUSG00000071547	5'-nucleotidase domain containing 2 [Source:MGI Symbol;Acc:MGI:1917271]	Nt5dc2	protein_coding	-0.618578	0.00843789	2.07377	0.143584	23	23	33	83	69	82	50.2101	0.234841	-2.63403
ENSMUSG00000021669	collagen, type IV, alpha 3 (Goodpasture antigen) binding protein [Source:MGI Symbol;Acc:MGI:1915268]	Col4a3bp	protein_coding	0.377385	0.00852232	2.06944	0.144871	820	1044	951	792	732	851	858.639	0.143457	2.63064
ENSMUSG00000067847	reactive oxygen species modulator 1 [Source:MGI Symbol;Acc:MGI:1914317]	Romo1	protein_coding	0.456039	0.00858468	2.06628	0.145779	619	594	514	482	434	431	512.109	0.17352	2.62817
ENSMUSG00000027455	NSFL1 (p97) cofactor (p47) [Source:MGI Symbol;Acc:MGI:3042273]	Nsfl1c	protein_coding	0.503331	0.00860192	2.0654	0.145921	449	836	596	488	400	458	532.582	0.191564	2.62748
ENSMUSG00000115684	predicted gene 6087 [Source:MGI Symbol;Acc:MGI:3644467]	Gm6087	processed_pseudogene	0.605459	0.00864784	2.06309	0.146246	43	60	61	21	28	14	38.2461	0.230592	2.62567
ENSMUSG00000031529	tankyrase, TRF1-interacting ankyrin-related ADP-ribose polymerase [Source:MGI Symbol;Acc:MGI:1341087]	Tnks	protein_coding	-0.386991	0.00864	2.06349	0.146246	700	973	919	1145	1619	1224	1062.13	0.14737	-2.62598
ENSMUSG00000022299	solute carrier family 25, member 32 [Source:MGI Symbol;Acc:MGI:1917156]	Slc25a32	protein_coding	-0.264898	0.00863927	2.06352	0.146246	1436	1763	1529	2057	2453	2006	1827.01	0.100875	-2.62601
ENSMUSG00000036833	patatin-like phospholipase domain containing 7 [Source:MGI Symbol;Acc:MGI:2385325]	Pnpla7	protein_coding	-0.567538	0.00867947	2.06151	0.146629	7	33	20	40	132	97	50.6859	0.216252	-2.62443
ENSMUSG00000115267	vomeronasal 1 receptor 76 [Source:MGI Symbol;Acc:MGI:2159643]	Vmn1r76	protein_coding	-0.602752	0.00876773	2.05711	0.147968	28	26	14	67	60	105	47.8427	0.229972	-2.62098
ENSMUSG00000037523	mitochondrial antiviral signaling protein [Source:MGI Symbol;Acc:MGI:2444773]	Mavs	protein_coding	-0.410265	0.00881423	2.05482	0.1486	615	797	728	960	1064	1332	890.563	0.156639	-2.61918
ENSMUSG00000063684	predicted gene 13910 [Source:MGI Symbol;Acc:MGI:3651143]	Gm13910	processed_pseudogene	0.537796	0.00882369	2.05435	0.148606	210	334	276	144	229	191	228.296	0.205359	2.61881
ENSMUSG00000061684	ribosomal protein L21, pseudogene 8 [Source:MGI Symbol;Acc:MGI:3648345]	Rpl21-ps8	processed_pseudogene	0.44984	0.00886272	2.05243	0.149075	23	16	15	1	2	1	10.2044	0.171872	2.6173
ENSMUSG00000022108	integral membrane protein 2B [Source:MGI Symbol;Acc:MGI:1309517]	Itm2b	protein_coding	-0.320859	0.00886974	2.05209	0.149075	1555	2411	1838	2760	2764	2761	2283.97	0.122604	-2.61703
ENSMUSG00000079659	transmembrane protein 243, mitochondrial [Source:MGI Symbol;Acc:MGI:3606159]	Tmem243	protein_coding	-0.288342	0.0088934	2.05093	0.14932	1175	1443	1293	1716	1815	1949	1528.14	0.110217	-2.61612
ENSMUSG00000022886	prolactin family 2, subfamily a, member 1 [Source:MGI Symbol;Acc:MGI:1861446]	Prl2a1	protein_coding	0.572592	0.0089357	2.04887	0.149876	71	37	56	9	17	25	37.2506	0.219006	2.6145
ENSMUSG00000115738	predicted gene 7543 [Source:MGI Symbol;Acc:MGI:3645066]	Gm7543	processed_pseudogene	0.518391	0.0089559	2.04789	0.150062	45	48	26	4	4	15	24.3356	0.198334	2.61373
ENSMUSG00000040601	NLR family, pyrin domain containing 4A [Source:MGI Symbol;Acc:MGI:2443697]	Nlrp4a	protein_coding	-0.247529	0.00900174	2.04567	0.150676	12122	13279	13765	17698	18413	17231	15099.4	0.0947665	-2.61199
ENSMUSG00000030677	kinesin family member 22 [Source:MGI Symbol;Acc:MGI:109233]	Kif22	protein_coding	-0.270724	0.0090584	2.04295	0.151469	6592	9567	8054	11300	11798	10173	9335.97	0.103732	-2.60984
ENSMUSG00000038145	SNF related kinase [Source:MGI Symbol;Acc:MGI:108104]	Snrk	protein_coding	0.60243	0.00908221	2.04181	0.151713	666	372	322	204	245	338	364.469	0.230909	2.60894
ENSMUSG00000083458	predicted pseudogene 5510 [Source:MGI Symbol;Acc:MGI:3648472]	Gm5510	processed_pseudogene	0.542357	0.00915087	2.03854	0.151884	196	317	226	177	149	169	204.429	0.20809	2.60637
ENSMUSG00000115523	predicted pseudogene 6340 [Source:MGI Symbol;Acc:MGI:3643354]	Gm6340	processed_pseudogene	0.51865	0.00915622	2.03828	0.151884	195	228	211	156	151	143	180.445	0.199009	2.60617
ENSMUSG00000033255	predicted gene 5134 [Source:MGI Symbol;Acc:MGI:3646667]	Gm5134	protein_coding	-0.481869	0.00915733	2.03823	0.151884	548	741	421	1087	906	897	744.077	0.184899	-2.60612
ENSMUSG00000073197	RIKEN cDNA 5730507C01 gene [Source:MGI Symbol;Acc:MGI:1917882]	5730507C01Rik	protein_coding	0.467667	0.00915	2.03858	0.151884	549	682	430	427	398	437	484.01	0.17943	2.6064
ENSMUSG00000111167	predicted gene, 39321 [Source:MGI Symbol;Acc:MGI:5622206]	Gm39321	lincRNA	-0.441255	0.00913671	2.03921	0.151884	462	622	483	679	1104	779	663.512	0.169264	-2.6069
ENSMUSG00000029128	RAB28, member RAS oncogene family [Source:MGI Symbol;Acc:MGI:1917285]	Rab28	protein_coding	-0.406938	0.00913986	2.03906	0.151884	0	0	0	22	41	23	13.0698	0.156108	-2.60678
ENSMUSG00000022354	NADH:ubiquinone oxidoreductase subunit B9 [Source:MGI Symbol;Acc:MGI:1913468]	Ndufb9	protein_coding	-0.402204	0.00911542	2.04022	0.151884	352	451	402	634	686	556	499.154	0.154237	-2.60769
ENSMUSG00000031255	synaptotagmin-like 4 [Source:MGI Symbol;Acc:MGI:1351606]	Sytl4	protein_coding	-0.348147	0.00925606	2.03357	0.153366	2218	3691	3177	4176	5015	4159	3625.25	0.133777	-2.60245
ENSMUSG00000003531	DiGeorge syndrome critical region gene 6 [Source:MGI Symbol;Acc:MGI:1202877]	Dgcr6	protein_coding	-0.312237	0.00928568	2.03219	0.153701	951	1337	986	1470	1590	1598	1286.12	0.120029	-2.60135
ENSMUSG00000110533	RNA binding motif protein 7 pseudogene [Source:MGI Symbol;Acc:MGI:3646609]	LOC665443	processed_pseudogene	0.600866	0.00932319	2.03044	0.154167	54	56	40	16	20	23	35.3443	0.231105	2.59997
ENSMUSG00000025260	hydroxysteroid (17-beta) dehydrogenase 10 [Source:MGI Symbol;Acc:MGI:1333871]	Hsd17b10	protein_coding	-0.61196	0.00936229	2.02862	0.154307	26	92	55	136	146	186	101.431	0.235502	-2.59853
ENSMUSG00000022843	chloride channel, voltage-sensitive 2 [Source:MGI Symbol;Acc:MGI:105061]	Clcn2	protein_coding	-0.586043	0.00936102	2.02868	0.154307	24	34	9	85	63	96	49.41	0.225524	-2.59858
ENSMUSG00000037916	NADH:ubiquinone oxidoreductase core subunit V1 [Source:MGI Symbol;Acc:MGI:107851]	Ndufv1	protein_coding	-0.287403	0.00937875	2.02785	0.154307	1498	2090	1639	2468	2506	2306	2031.39	0.110628	-2.59793
ENSMUSG00000018415	GID complex subunit 4, VID24 homolog [Source:MGI Symbol;Acc:MGI:1914021]	Gid4	protein_coding	-0.270504	0.00934194	2.02956	0.154307	2145	2318	2122	2906	3025	3193	2561.91	0.104069	-2.59928
ENSMUSG00000001036	epsin 2 [Source:MGI Symbol;Acc:MGI:1333766]	Epn2	protein_coding	-0.200753	0.00937002	2.02826	0.154307	10793	13796	12702	15556	17745	15526	14022	0.0772646	-2.59825
ENSMUSG00000028860	synaptotagmin-like 1 [Source:MGI Symbol;Acc:MGI:1933365]	Sytl1	protein_coding	-0.570438	0.00940949	2.02643	0.154502	6	14	15	42	64	41	28.494	0.219669	-2.59681
ENSMUSG00000083186	predicted gene 11805 [Source:MGI Symbol;Acc:MGI:3649544]	Gm11805	processed_pseudogene	0.522985	0.00940148	2.0268	0.154502	29	27	29	8	7	3	17.777	0.201373	2.5971
ENSMUSG00000056228	cysteinyl-tRNA synthetase 2 (mitochondrial)(putative) [Source:MGI Symbol;Acc:MGI:1919191]	Cars2	protein_coding	-0.588926	0.00943059	2.02546	0.154694	84	179	91	221	236	290	175.6	0.226856	-2.59604
ENSMUSG00000116792	novel transcript	CT030688.2	lincRNA	-0.474854	0.0094482	2.02465	0.154828	787	1027	526	1311	1463	1173	1012.89	0.18296	-2.5954
ENSMUSG00000026028	trafficking protein, kinesin binding 2 [Source:MGI Symbol;Acc:MGI:1918077]	Trak2	protein_coding	0.605864	0.00949736	2.0224	0.154953	285	93	385	112	116	107	190.223	0.233598	2.59361
ENSMUSG00000037361	splicing factor 3B, subunit 6 [Source:MGI Symbol;Acc:MGI:1913305]	Sf3b6	protein_coding	-0.563239	0.00950313	2.02213	0.154953	108	250	191	360	362	351	259.739	0.217181	-2.5934
ENSMUSG00000052656	ring finger protein 103 [Source:MGI Symbol;Acc:MGI:109483]	Rnf103	protein_coding	-0.538616	0.00948316	2.02305	0.154953	3	29	27	55	151	103	56.689	0.207629	-2.59413
ENSMUSG00000109795	predicted gene 45522 [Source:MGI Symbol;Acc:MGI:5791358]	Gm45522	processed_pseudogene	0.535736	0.0094889	2.02278	0.154953	165	194	160	115	130	112	145.629	0.206535	2.59392
ENSMUSG00000038507	poly (ADP-ribose) polymerase family, member 12 [Source:MGI Symbol;Acc:MGI:2143990]	Parp12	protein_coding	-0.190602	0.00948849	2.0228	0.154953	22747	27402	24494	31206	32377	33298	27987.9	0.0734801	-2.59393
ENSMUSG00000041777	corepressor interacting with RBPJ, 1 [Source:MGI Symbol;Acc:MGI:1914185]	Cir1	protein_coding	0.610801	0.00957107	2.01904	0.155596	86	99	63	47	40	31	61.5202	0.235744	2.59095
ENSMUSG00000073609	D-2-hydroxyglutarate dehydrogenase [Source:MGI Symbol;Acc:MGI:2138209]	D2hgdh	protein_coding	0.482398	0.00956858	2.01915	0.155596	90	29	30	2	16	5	30.5203	0.186179	2.59104
ENSMUSG00000100863	predicted gene 12669 [Source:MGI Symbol;Acc:MGI:3651683]	Gm12669	processed_pseudogene	-0.414491	0.00956846	2.01916	0.155596	424	535	483	761	681	825	602.535	0.15997	-2.59105
ENSMUSG00000004446	BH3 interacting domain death agonist [Source:MGI Symbol;Acc:MGI:108093]	Bid	protein_coding	-0.412675	0.00965919	2.01506	0.156873	1	0	0	28	15	34	12.2181	0.15947	-2.5878
ENSMUSG00000021694	excision repaiross-complementing rodent repair deficiency, complementation group 8 [Source:MGI Symbol;Acc:MGI:1919241]	Ercc8	protein_coding	-0.514923	0.00969858	2.01329	0.157357	226	205	160	356	374	344	269.587	0.199089	-2.58639
ENSMUSG00000089967	predicted gene 16550 [Source:MGI Symbol;Acc:MGI:4414970]	Gm16550	processed_pseudogene	0.594078	0.00976439	2.01035	0.157956	87	108	110	57	60	59	80.4864	0.229901	2.58406
ENSMUSG00000009030	phosducin-like [Source:MGI Symbol;Acc:MGI:1914716]	Pdcl	protein_coding	-0.533826	0.00974941	2.01102	0.157956	185	207	244	323	536	348	295.768	0.206541	-2.58459
ENSMUSG00000014232	clusterin associated protein 1 [Source:MGI Symbol;Acc:MGI:1924029]	Cluap1	protein_coding	-0.493741	0.0097603	2.01054	0.157956	145	221	182	287	370	298	241.583	0.191061	-2.58421
ENSMUSG00000026672	optineurin [Source:MGI Symbol;Acc:MGI:1918898]	Optn	protein_coding	-0.388863	0.00979741	2.00889	0.158177	676	798	548	949	1049	1107	830.867	0.150553	-2.5829
ENSMUSG00000025138	sirtuin 7 [Source:MGI Symbol;Acc:MGI:2385849]	Sirt7	protein_coding	-0.298691	0.00979005	2.00922	0.158177	1114	1279	993	1524	1676	1594	1330.02	0.11563	-2.58316
ENSMUSG00000031166	WD repeat domain 13 [Source:MGI Symbol;Acc:MGI:1914661]	Wdr13	protein_coding	-0.502259	0.00984385	2.00684	0.158771	201	311	343	456	524	531	381.478	0.194578	-2.58127
ENSMUSG00000106926	ribosomal protein L7, pseudogene 7 [Source:MGI Symbol;Acc:MGI:3644615]	Rpl7-ps7	processed_pseudogene	0.418027	0.00986959	2.0057	0.158992	11	31	19	1	0	1	10.693	0.162003	2.58037
ENSMUSG00000083679	predicted gene 12892 [Source:MGI Symbol;Acc:MGI:3649649]	Gm12892	processed_pseudogene	0.352055	0.00987696	2.00538	0.158992	1049	1654	1350	1080	1314	1102	1239.53	0.13645	2.58011
ENSMUSG00000106831	ubiquitin-conjugating enzyme E2N, pseudogene 1 [Source:MGI Symbol;Acc:MGI:894296]	Ube2n-ps1	processed_pseudogene	0.492415	0.00989666	2.00451	0.159153	407	458	305	252	347	268	337.079	0.190902	2.57942
ENSMUSG00000060863	T cell leukemia/lymphoma 1B, 2 [Source:MGI Symbol;Acc:MGI:1351609]	Tcl1b2	protein_coding	0.292945	0.00992119	2.00344	0.159391	5353	7352	4945	5190	5929	4920	5530.07	0.113608	2.57856
ENSMUSG00000056296	synaptoporin [Source:MGI Symbol;Acc:MGI:1919253]	Synpr	protein_coding	-0.405635	0.00999628	2.00016	0.16044	1	0	0	39	9	58	16.887	0.15747	-2.57596
ENSMUSG00000096006	predicted gene, 21596 [Source:MGI Symbol;Acc:MGI:5434951]	Gm21596	processed_pseudogene	0.490257	0.0100176	1.99924	0.160625	20	27	22	5	2	4	13.7379	0.190375	2.57522
ENSMUSG00000049295	zinc finger protein 219 [Source:MGI Symbol;Acc:MGI:1917140]	Zfp219	protein_coding	-0.600328	0.0100751	1.99675	0.161389	24	21	37	59	97	100	53.6908	0.233296	-2.57324
ENSMUSG00000033373	farnesyltransferase, CAAX box, beta [Source:MGI Symbol;Acc:MGI:1861305]	Fntb	protein_coding	0.510493	0.0100985	1.99574	0.161606	272	319	230	157	234	200	233.697	0.198447	2.57244
ENSMUSG00000037798	methionine adenosyltransferase I, alpha [Source:MGI Symbol;Acc:MGI:88017]	Mat1a	protein_coding	-0.434844	0.0101467	1.99368	0.162218	615	1135	931	1189	1595	1523	1123.55	0.169148	-2.57079
ENSMUSG00000040289	hairy/enhancer-of-split related with YRPW motif 1 [Source:MGI Symbol;Acc:MGI:1341800]	Hey1	protein_coding	0.501728	0.0101765	1.9924	0.162536	303	308	313	215	202	256	266.538	0.195242	2.56978
ENSMUSG00000053600	zinc finger protein 472 [Source:MGI Symbol;Acc:MGI:2385049]	Zfp472	protein_coding	-0.441381	0.0102209	1.99051	0.163087	538	930	900	1289	1344	1199	1001.34	0.171859	-2.56827
ENSMUSG00000006418	ring finger protein 114 [Source:MGI Symbol;Acc:MGI:1933159]	Rnf114	protein_coding	-0.267966	0.0102593	1.98888	0.16354	12893	19174	15520	20629	21247	23257	18307.2	0.10439	-2.56696
ENSMUSG00000080950	predicted gene 7278 [Source:MGI Symbol;Acc:MGI:3645261]	Gm7278	processed_pseudogene	0.604832	0.0102863	1.98774	0.16377	75	95	76	47	28	41	60.9817	0.235705	2.56605
ENSMUSG00000038279	NOP2 nucleolar protein [Source:MGI Symbol;Acc:MGI:107891]	Nop2	protein_coding	-0.60391	0.0103037	1.98701	0.16377	31	109	44	171	159	161	106.774	0.2354	-2.56547
ENSMUSG00000022307	oxidation resistance 1 [Source:MGI Symbol;Acc:MGI:2179326]	Oxr1	protein_coding	-0.494607	0.0103037	1.98701	0.16377	289	380	309	411	765	553	433.511	0.192794	-2.56547
ENSMUSG00000024726	carnosine N-methyltransferase 1 [Source:MGI Symbol;Acc:MGI:1914633]	Carnmt1	protein_coding	0.601643	0.010316	1.98649	0.163807	83	85	77	46	44	40	63.1073	0.234554	2.56505
ENSMUSG00000071419	ribosomal protein S15, pseudogene 2 [Source:MGI Symbol;Acc:MGI:3647234]	Rps15-ps2	processed_pseudogene	0.598825	0.0103268	1.98603	0.163819	69	54	49	24	25	25	41.8639	0.233488	2.56469
ENSMUSG00000004319	chloride channel, voltage-sensitive 3 [Source:MGI Symbol;Acc:MGI:103555]	Clcn3	protein_coding	0.388078	0.010352	1.98498	0.16406	1038	1184	1054	1013	826	890	996.521	0.151366	2.56384
ENSMUSG00000020514	mitochondrial ribosomal protein L22 [Source:MGI Symbol;Acc:MGI:1333794]	Mrpl22	protein_coding	0.428054	0.0103844	1.98362	0.164415	578	664	495	499	466	422	517.758	0.167029	2.56276
ENSMUSG00000087455	RIKEN cDNA 5330411J11 gene [Source:MGI Symbol;Acc:MGI:1923926]	5330411J11Rik	processed_transcript	-0.395175	0.0104896	1.97924	0.16592	0	0	0	24	25	30	12.1865	0.15441	-2.55926
ENSMUSG00000059920	RIKEN cDNA 4930453N24 gene [Source:MGI Symbol;Acc:MGI:1914859]	4930453N24Rik	protein_coding	0.347434	0.0105712	1.97588	0.167049	1330	1783	1362	1391	1346	1132	1375.7	0.135899	2.55656
ENSMUSG00000067719	predicted gene 10221 [Source:MGI Symbol;Acc:MGI:3708709]	Gm10221	processed_pseudogene	0.420074	0.0106558	1.97241	0.168224	21	17	22	1	0	2	11.1146	0.16449	2.55379
ENSMUSG00000023074	motile sperm domain containing 1 [Source:MGI Symbol;Acc:MGI:1917630]	Mospd1	protein_coding	0.334829	0.0106771	1.97155	0.168398	3656	4710	3479	3363	4208	2859	3661.95	0.131146	2.55309
ENSMUSG00000074852	heparanase 2 [Source:MGI Symbol;Acc:MGI:2685814]	Hpse2	protein_coding	0.418027	0.010697	1.97074	0.16855	30	17	17	2	0	1	11.9342	0.163775	2.55244
ENSMUSG00000063904	dipeptidylpeptidase 3 [Source:MGI Symbol;Acc:MGI:1922471]	Dpp3	protein_coding	-0.582518	0.0107583	1.96826	0.16929	95	82	112	168	291	183	148.964	0.228398	-2.55045
ENSMUSG00000045538	DEAD (Asp-Glu-Ala-Asp) box polypeptide 28 [Source:MGI Symbol;Acc:MGI:1919236]	Ddx28	protein_coding	-0.386249	0.0107647	1.968	0.16929	2100	2916	1981	3854	3023	3721	2858.32	0.151455	-2.55025
ENSMUSG00000055067	SET and MYND domain containing 3 [Source:MGI Symbol;Acc:MGI:1916976]	Smyd3	protein_coding	-0.308026	0.0107945	1.9668	0.169597	1055	1377	1010	1552	1631	1706	1352.65	0.120829	-2.54928
ENSMUSG00000024429	guanine nucleotide binding protein-like 1 [Source:MGI Symbol;Acc:MGI:95764]	Gnl1	protein_coding	-0.518321	0.0108308	1.96534	0.169841	306	312	254	500	424	668	399.663	0.203414	-2.54811
ENSMUSG00000113617	predicted gene 8655 [Source:MGI Symbol;Acc:MGI:3647209]	Gm8655	processed_pseudogene	0.415715	0.0108267	1.9655	0.169841	30	22	12	0	1	2	11.7793	0.163138	2.54824
ENSMUSG00000042105	inositol polyphosphate-5-phosphatase F [Source:MGI Symbol;Acc:MGI:2141867]	Inpp5f	protein_coding	-0.514998	0.0108902	1.96296	0.170512	261	355	491	634	760	630	505.062	0.202261	-2.5462
ENSMUSG00000037005	X-prolyl aminopeptidase (aminopeptidase P) 2, membrane-bound [Source:MGI Symbol;Acc:MGI:2180001]	Xpnpep2	protein_coding	-0.390771	0.0108944	1.9628	0.170512	0	0	0	19	77	18	16.9723	0.15348	-2.54607
ENSMUSG00000026960	ADP-ribosylation factor-like 6 interacting protein 6 [Source:MGI Symbol;Acc:MGI:1929507]	Arl6ip6	protein_coding	-0.556765	0.0109196	1.96179	0.170736	170	241	134	295	501	291	259.82	0.218746	-2.54526
ENSMUSG00000049252	low density lipoprotein-related protein 1B (deleted in tumors) [Source:MGI Symbol;Acc:MGI:2151136]	Lrp1b	protein_coding	-0.389491	0.0109295	1.9614	0.170736	932	1040	768	1509	1303	1393	1130.05	0.153045	-2.54494
ENSMUSG00000050989	selenoprotein N [Source:MGI Symbol;Acc:MGI:2151208]	Selenon	protein_coding	0.448593	0.0109825	1.9593	0.1714	89	36	53	12	0	7	35.2399	0.176385	2.54326
ENSMUSG00000054312	mitochondrial ribosomal protein S21 [Source:MGI Symbol;Acc:MGI:1913542]	Mrps21	protein_coding	0.531468	0.0110724	1.95576	0.172638	467	475	297	298	242	305	347.934	0.209206	2.54041
ENSMUSG00000105235	host cell factor C1 regulator 1 (XPO1-dependent), pseudogene 1 [Source:MGI Symbol;Acc:MGI:3782642]	Hcfc1r1-ps1	processed_pseudogene	0.441828	0.0111276	1.9536	0.173334	13	22	18	2	2	1	9.94081	0.17404	2.53867
ENSMUSG00000053838	NudC domain containing 3 [Source:MGI Symbol;Acc:MGI:2144158]	Nudcd3	protein_coding	-0.400995	0.0111388	1.95316	0.173344	1654	1672	2292	2727	3011	3115	2354.81	0.157977	-2.53831
ENSMUSG00000024421	laminin, alpha 3 [Source:MGI Symbol;Acc:MGI:99909]	Lama3	protein_coding	-0.405193	0.0111661	1.9521	0.173604	0	0	3	15	82	38	20.682	0.159684	-2.53746
ENSMUSG00000026944	ATP-binding cassette, sub-family A (ABC1), member 2 [Source:MGI Symbol;Acc:MGI:99606]	Abca2	protein_coding	0.593819	0.0112145	1.95022	0.173697	259	85	190	74	71	99	134.763	0.234161	2.53594
ENSMUSG00000003444	mediator complex subunit 29 [Source:MGI Symbol;Acc:MGI:1914474]	Med29	protein_coding	0.568982	0.0111945	1.951	0.173697	257	233	165	146	158	105	178.183	0.224312	2.53657
ENSMUSG00000022151	tetratricopeptide repeat domain 33 [Source:MGI Symbol;Acc:MGI:1914765]	Ttc33	protein_coding	-0.368397	0.0112104	1.95038	0.173697	1703	2589	1709	2775	3678	2563	2419.6	0.145263	-2.53607
ENSMUSG00000032238	RAR-related orphan receptor alpha [Source:MGI Symbol;Acc:MGI:104661]	Rora	protein_coding	-0.29891	0.0112125	1.9503	0.173697	1243	1336	1146	1775	1794	1715	1468.14	0.117866	-2.536
ENSMUSG00000064281	ribosomal protein L19, pseudogene 1 [Source:MGI Symbol;Acc:MGI:3642668]	Rpl19-ps1	processed_pseudogene	0.432301	0.0112416	1.94917	0.173953	23	30	24	4	0	2	14.3782	0.170526	2.5351
ENSMUSG00000026019	WD repeat domain 12 [Source:MGI Symbol;Acc:MGI:1927241]	Wdr12	protein_coding	0.499539	0.0112826	1.94759	0.174423	363	333	434	284	266	276	327.411	0.197149	2.53382
ENSMUSG00000100839	predicted gene 5920 [Source:MGI Symbol;Acc:MGI:3645716]	Gm5920	processed_pseudogene	0.386128	0.0113063	1.94668	0.174624	21	19	29	0	0	0	12.2197	0.152434	2.53309
ENSMUSG00000063556	predicted gene 10132 [Source:MGI Symbol;Acc:MGI:3704449]	Gm10132	processed_pseudogene	0.422316	0.0113251	1.94596	0.17475	17	16	14	1	1	1	8.73556	0.166758	2.5325
ENSMUSG00000001983	translational activator of mitochondrially encoded cytochrome c oxidase I [Source:MGI Symbol;Acc:MGI:1917457]	Taco1	protein_coding	-0.59131	0.0114134	1.94259	0.175781	47	85	49	119	188	116	95.6333	0.23374	-2.52978
ENSMUSG00000064210	anoctamin 6 [Source:MGI Symbol;Acc:MGI:2145890]	Ano6	protein_coding	-0.484467	0.0114113	1.94266	0.175781	283	372	224	405	557	559	385.796	0.191501	-2.52984
ENSMUSG00000082274	predicted gene 14026 [Source:MGI Symbol;Acc:MGI:3649712]	Gm14026	processed_pseudogene	0.456359	0.0114968	1.93942	0.1769	368	436	448	319	292	354	368.552	0.180577	2.52722
ENSMUSG00000017670	engulfment and cell motility 2 [Source:MGI Symbol;Acc:MGI:2153045]	Elmo2	protein_coding	-0.59476	0.0115177	1.93864	0.177054	48	105	47	94	255	195	116.366	0.235401	-2.52659
ENSMUSG00000109235	predicted gene 5997 [Source:MGI Symbol;Acc:MGI:3648188]	Gm5997	processed_pseudogene	0.594471	0.0115526	1.93732	0.177425	71	74	81	33	45	40	57.838	0.235385	2.52552
ENSMUSG00000032582	RNA binding motif protein 6 [Source:MGI Symbol;Acc:MGI:1338037]	Rbm6	protein_coding	0.280139	0.0115669	1.93678	0.177478	2230	2478	2462	2009	2580	2078	2280.44	0.110942	2.52509
ENSMUSG00000048307	ankyrin repeat domain 46 [Source:MGI Symbol;Acc:MGI:1916089]	Ankrd46	protein_coding	-0.561433	0.0116544	1.93351	0.178654	24	31	101	183	321	105	120.141	0.222575	-2.52244
ENSMUSG00000022323	reactive intermediate imine deaminase A homolog [Source:MGI Symbol;Acc:MGI:1095401]	Rida	protein_coding	0.461765	0.0116973	1.93191	0.179144	526	465	415	373	364	347	415.345	0.183157	2.52115
ENSMUSG00000028392	B-box and SPRY domain containing [Source:MGI Symbol;Acc:MGI:2177191]	Bspry	protein_coding	-0.388479	0.0117341	1.93055	0.179539	668	777	881	1221	1147	1220	962.624	0.154156	-2.52004
ENSMUSG00000023806	radial spoke 3B homolog (Chlamydomonas) [Source:MGI Symbol;Acc:MGI:3630308]	Rsph3b	protein_coding	0.511639	0.0117727	1.92913	0.179924	42	34	21	4	8	11	20.628	0.203121	2.51889
ENSMUSG00000030086	coiled-coil-helix-coiled-coil-helix domain containing 6 [Source:MGI Symbol;Acc:MGI:1913348]	Chchd6	protein_coding	-0.444776	0.0117922	1.92841	0.179924	564	1124	684	1243	1277	1304	996.565	0.176617	-2.5183
ENSMUSG00000027091	zinc finger CCCH-type containing 15 [Source:MGI Symbol;Acc:MGI:1919747]	Zc3h15	protein_coding	0.356374	0.0117864	1.92862	0.179924	1692	1842	1367	1270	1694	1287	1509.02	0.141504	2.51847
ENSMUSG00000051041	olfactomedin-like 1 [Source:MGI Symbol;Acc:MGI:2679264]	Olfml1	protein_coding	0.591784	0.0118202	1.92737	0.180176	212	144	116	75	42	102	118.067	0.235071	2.51747
ENSMUSG00000032547	receptor-like tyrosine kinase [Source:MGI Symbol;Acc:MGI:101766]	Ryk	protein_coding	-0.303026	0.0118307	1.92699	0.180176	2045	2299	1908	2597	3619	2738	2465.1	0.120384	-2.51715
ENSMUSG00000021811	DnaJ heat shock protein family (Hsp40) member C9 [Source:MGI Symbol;Acc:MGI:1915326]	Dnajc9	protein_coding	0.382422	0.0119024	1.92437	0.180805	2451	3325	3115	2411	2088	2914	2698.02	0.152055	2.51503
ENSMUSG00000092344	heat shock protein 1 (chaperonin 10), pseudogene 3 [Source:MGI Symbol;Acc:MGI:1935163]	Hspe1-ps3	processed_pseudogene	0.381671	0.0119051	1.92427	0.180805	23	26	18	0	0	0	11.7008	0.151761	2.51495
ENSMUSG00000026577	basic leucine zipper nuclear factor 1 [Source:MGI Symbol;Acc:MGI:1201607]	Blzf1	protein_coding	-0.343845	0.0118966	1.92458	0.180805	1029	1345	1323	1561	2207	1715	1484.99	0.136707	-2.5152
ENSMUSG00000055371	signal transducing adaptor molecule (SH3 domain and ITAM motif) 2 [Source:MGI Symbol;Acc:MGI:1929100]	Stam2	protein_coding	-0.519008	0.0119481	1.9227	0.18129	214	300	364	405	594	629	402.943	0.206474	-2.51367
ENSMUSG00000056124	UDP-Gal:betaGlcNAc beta 1,4-galactosyltransferase, polypeptide 6 [Source:MGI Symbol;Acc:MGI:1928380]	B4galt6	protein_coding	-0.228664	0.0119595	1.92229	0.181295	4353	5638	5165	6109	6999	7158	5763.8	0.0909802	-2.51334
ENSMUSG00000081975	predicted gene 12482 [Source:MGI Symbol;Acc:MGI:3651627]	Gm12482	processed_pseudogene	0.516655	0.0119995	1.92084	0.181733	314	343	246	200	268	169	255.475	0.205662	2.51216
ENSMUSG00000048439	nucleoporin like 2 [Source:MGI Symbol;Acc:MGI:2387631]	Nupl2	protein_coding	-0.552043	0.0120129	1.92035	0.181769	159	173	176	223	486	322	245.564	0.219783	-2.51176
ENSMUSG00000031379	pirin [Source:MGI Symbol;Acc:MGI:1916906]	Pir	protein_coding	-0.571654	0.0120589	1.91869	0.182288	11	35	46	114	85	109	63.7246	0.227713	-2.51042
ENSMUSG00000066031	predicted gene 13023 [Source:MGI Symbol;Acc:MGI:3650478]	Gm13023	protein_coding	0.314707	0.0120694	1.91831	0.182288	12737	11886	9792	10163	11168	9725	10837.6	0.125376	2.51011
ENSMUSG00000116976	novel transcript	AC130529.1	processed_transcript	-0.539263	0.0121436	1.91565	0.183238	162	264	192	441	292	435	288.678	0.215022	-2.50794
ENSMUSG00000075002	predicted gene 813 [Source:MGI Symbol;Acc:MGI:2685659]	Gm813	protein_coding	-0.412659	0.0122117	1.91322	0.184096	10644	12307	10035	21220	13247	17161	13815.6	0.164671	-2.50597
ENSMUSG00000024137	E4F transcription factor 1 [Source:MGI Symbol;Acc:MGI:109530]	E4f1	protein_coding	-0.343907	0.0122456	1.91202	0.184439	531	593	597	803	945	805	694.338	0.137289	-2.50499
ENSMUSG00000007036	abhydrolase domain containing 16A [Source:MGI Symbol;Acc:MGI:99476]	Abhd16a	protein_coding	-0.384856	0.0122913	1.9104	0.184956	1924	2491	1626	3265	2660	3250	2472.26	0.153717	-2.50367
ENSMUSG00000022019	tudor domain containing 3 [Source:MGI Symbol;Acc:MGI:2444023]	Tdrd3	protein_coding	-0.330314	0.0123267	1.90915	0.185318	1667	2800	1970	2979	3175	3113	2539.52	0.131986	-2.50265
ENSMUSG00000015980	leucine rich repeat containing 27 [Source:MGI Symbol;Acc:MGI:1923862]	Lrrc27	protein_coding	0.529744	0.0123709	1.9076	0.185813	242	227	186	154	138	155	184.391	0.21178	2.50138
ENSMUSG00000047446	ADP-ribosylation factor-like 4A [Source:MGI Symbol;Acc:MGI:99437]	Arl4a	protein_coding	-0.264752	0.0123866	1.90705	0.185878	1507	1599	1456	2037	2234	2037	1771.82	0.105861	-2.50094
ENSMUSG00000021748	pyruvate dehydrogenase (lipoamide) beta [Source:MGI Symbol;Acc:MGI:1915513]	Pdhb	protein_coding	0.472366	0.0124154	1.90604	0.185971	404	756	628	443	421	463	513.725	0.188938	2.50011
ENSMUSG00000108107	predicted gene 5312 [Source:MGI Symbol;Acc:MGI:3643752]	Gm5312	processed_pseudogene	0.388057	0.0124093	1.90625	0.185971	21	25	13	1	0	0	10.4221	0.155205	2.50029
ENSMUSG00000052551	adenosine deaminase, RNA-specific, B2 [Source:MGI Symbol;Acc:MGI:2151118]	Adarb2	protein_coding	-0.461818	0.0124461	1.90497	0.18626	457	505	307	634	835	675	550.27	0.184784	-2.49924
ENSMUSG00000039497	dermatan sulfate epimerase [Source:MGI Symbol;Acc:MGI:2443455]	Dse	protein_coding	-0.292782	0.0125023	1.90301	0.186759	1607	1608	1668	2112	2548	2286	1926.75	0.117223	-2.49764
ENSMUSG00000029276	glomulin, FKBP associated protein [Source:MGI Symbol;Acc:MGI:2141180]	Glmn	protein_coding	-0.26226	0.0124993	1.90312	0.186759	2254	2739	2196	3212	3731	2944	2774.73	0.104999	-2.49773
ENSMUSG00000009905	3-ketodihydrosphingosine reductase [Source:MGI Symbol;Acc:MGI:1918000]	Kdsr	protein_coding	-0.43174	0.0125666	1.90078	0.187379	320	469	468	585	806	650	531.599	0.172985	-2.49582
ENSMUSG00000038546	RAN binding protein 9 [Source:MGI Symbol;Acc:MGI:1928741]	Ranbp9	protein_coding	-0.391606	0.0125616	1.90096	0.187379	3771	4364	4283	7801	6242	5101	5143.99	0.156896	-2.49596
ENSMUSG00000038570	stabilizer of axonemal microtubules 2 [Source:MGI Symbol;Acc:MGI:1914618]	Saxo2	protein_coding	-0.587833	0.012599	1.89966	0.187615	51	36	42	86	143	103	73.5883	0.235613	-2.49491
ENSMUSG00000018669	CDK5 regulatory subunit associated protein 3 [Source:MGI Symbol;Acc:MGI:1933126]	Cdk5rap3	protein_coding	-0.511016	0.0126053	1.89945	0.187615	234	307	177	353	562	396	324.685	0.204838	-2.49473
ENSMUSG00000110808	predicted gene 5364 [Source:MGI Symbol;Acc:MGI:3646198]	Gm5364	processed_pseudogene	0.584461	0.0126786	1.89693	0.188502	105	131	72	45	64	58	79.0748	0.234472	2.49267
ENSMUSG00000049124	predicted gene 8186 [Source:MGI Symbol;Acc:MGI:3643110]	Gm8186	protein_coding	0.484296	0.012688	1.89661	0.188502	436	502	368	375	322	263	376.699	0.194309	2.49241
ENSMUSG00000003438	translocase of inner mitochondrial membrane 50 [Source:MGI Symbol;Acc:MGI:1913775]	Timm50	protein_coding	-0.346396	0.0127318	1.89511	0.188982	771	1027	976	1423	1310	1351	1115.36	0.139049	-2.49119
ENSMUSG00000003226	RAN binding protein 2 [Source:MGI Symbol;Acc:MGI:894323]	Ranbp2	protein_coding	-0.513889	0.0127917	1.89307	0.189528	263	379	230	410	739	455	394.98	0.206421	-2.48952
ENSMUSG00000046985	transmembrane anterior posterior transformation 1 [Source:MGI Symbol;Acc:MGI:2683537]	Tapt1	protein_coding	-0.339807	0.0127831	1.89336	0.189528	910	1240	1283	1607	1756	1681	1376.17	0.136482	-2.48975
ENSMUSG00000073678	post-GPI attachment to proteins 1 [Source:MGI Symbol;Acc:MGI:2443342]	Pgap1	protein_coding	-0.581636	0.0128522	1.89102	0.19017	135	125	124	146	437	334	206.272	0.233792	-2.48784
ENSMUSG00000040242	FGFR1 oncogene partner 2 [Source:MGI Symbol;Acc:MGI:1914779]	Fgfr1op2	protein_coding	0.357684	0.0128583	1.89082	0.19017	896	906	794	736	736	768	801.675	0.143782	2.48767
ENSMUSG00000032396	DIS3 like exosome 3'-5' exoribonuclease [Source:MGI Symbol;Acc:MGI:2143272]	Dis3l	protein_coding	-0.346333	0.0129167	1.88885	0.190767	2176	3901	2984	4138	4527	4580	3604.06	0.13931	-2.48606
ENSMUSG00000032612	ubiquitin specific peptidase 4 (proto-oncogene) [Source:MGI Symbol;Acc:MGI:98905]	Usp4	protein_coding	-0.221039	0.0129219	1.88867	0.190767	3232	4342	3851	4729	5598	4859	4325.35	0.0889166	-2.48591
ENSMUSG00000050910	cerebellar degeneration-related protein 2-like [Source:MGI Symbol;Acc:MGI:2684867]	Cdr2l	protein_coding	0.547997	0.0129648	1.88723	0.191228	73	51	119	40	13	28	56.2029	0.220545	2.48474
ENSMUSG00000005881	ERGIC and golgi 3 [Source:MGI Symbol;Acc:MGI:1913616]	Ergic3	protein_coding	-0.254593	0.012985	1.88656	0.191354	1798	2223	1656	2418	2778	2549	2181	0.102486	-2.48418
ENSMUSG00000026492	transcription factor B2, mitochondrial [Source:MGI Symbol;Acc:MGI:107937]	Tfb2m	protein_coding	0.579646	0.0130376	1.8848	0.191957	80	121	118	45	76	58	82.8018	0.23347	2.48274
ENSMUSG00000081208	predicted gene 11400 [Source:MGI Symbol;Acc:MGI:3705645]	Gm11400	processed_pseudogene	0.571528	0.0131488	1.88112	0.193245	46	53	41	15	19	23	33.2242	0.230481	2.47971
ENSMUSG00000115453	cDNA sequence BC048602 [Source:MGI Symbol;Acc:MGI:3758910]	BC048602	lincRNA	-0.499997	0.0131457	1.88122	0.193245	218	264	174	447	371	347	294.768	0.201628	-2.4798
ENSMUSG00000037075	ring finger protein 139 [Source:MGI Symbol;Acc:MGI:1923091]	Rnf139	protein_coding	-0.330446	0.0132266	1.87855	0.194042	1715	1760	1443	2438	2274	2463	1971.92	0.133373	-2.47761
ENSMUSG00000028478	clathrin, light polypeptide (Lca) [Source:MGI Symbol;Acc:MGI:894297]	Clta	protein_coding	-0.31112	0.0132233	1.87866	0.194042	989	1244	1063	1504	1852	1376	1301.56	0.125568	-2.4777
ENSMUSG00000060727	predicted gene 12571 [Source:MGI Symbol;Acc:MGI:3649675]	Gm12571	processed_pseudogene	0.540944	0.0133502	1.87451	0.195505	114	169	152	87	104	94	119.432	0.218626	2.47429
ENSMUSG00000021024	proteasome (prosome, macropain) subunit, alpha type 6 [Source:MGI Symbol;Acc:MGI:1347006]	Psma6	protein_coding	-0.303161	0.0133406	1.87483	0.195505	2503	3033	2452	4140	3648	3517	3143.75	0.122512	-2.47455
ENSMUSG00000016831	TOX high mobility group box family member 4 [Source:MGI Symbol;Acc:MGI:1915389]	Tox4	protein_coding	-0.581623	0.0133788	1.87358	0.195748	45	129	137	215	298	232	167.612	0.235139	-2.47352
ENSMUSG00000044308	ubiquitin protein ligase E3 component n-recognin 3 [Source:MGI Symbol;Acc:MGI:1861100]	Ubr3	protein_coding	-0.470911	0.0134352	1.87176	0.196398	225	242	193	299	423	415	289.85	0.190496	-2.47202
ENSMUSG00000026887	mitochondrial ribosome recycling factor [Source:MGI Symbol;Acc:MGI:1915121]	Mrrf	protein_coding	0.469656	0.0134669	1.87073	0.196687	381	679	628	363	493	411	486.471	0.190054	2.47118
ENSMUSG00000086494	RIKEN cDNA 2210417A02 gene [Source:MGI Symbol;Acc:MGI:1917388]	2210417A02Rik	lincRNA	-0.537155	0.0135124	1.86927	0.197167	19	15	8	73	66	33	33.9939	0.217474	-2.46997
ENSMUSG00000030102	inositol 1,4,5-trisphosphate receptor 1 [Source:MGI Symbol;Acc:MGI:96623]	Itpr1	protein_coding	0.441713	0.0135239	1.8689	0.197167	854	743	690	492	618	702	682.172	0.178855	2.46967
ENSMUSG00000095653	predicted gene, 21818 [Source:MGI Symbol;Acc:MGI:5433982]	Gm21818	protein_coding	0.570177	0.013558	1.86781	0.197488	125	120	105	77	74	55	93.3708	0.230956	2.46877
ENSMUSG00000092417	G patch domain and ankyrin repeats 1 [Source:MGI Symbol;Acc:MGI:2148975]	Gpank1	protein_coding	0.429065	0.0135839	1.86697	0.197691	374	512	412	373	345	307	384.21	0.173846	2.46808
ENSMUSG00000002812	flightless I actin binding protein [Source:MGI Symbol;Acc:MGI:1342286]	Flii	protein_coding	-0.44017	0.0136522	1.8648	0.198156	1069	2087	1854	2105	3190	2885	2116.61	0.178475	-2.46629
ENSMUSG00000021391	centromere protein P [Source:MGI Symbol;Acc:MGI:1913586]	Cenpp	protein_coding	-0.39982	0.0136492	1.86489	0.198156	414	638	481	835	751	783	632.01	0.162109	-2.46637
ENSMUSG00000035629	RUN domain and cysteine-rich domain containing, Beclin 1-interacting protein [Source:MGI Symbol;Acc:MGI:1915160]	Rubcn	protein_coding	-0.162803	0.0136501	1.86487	0.198156	8394	10275	8961	10676	12963	11601	10240.9	0.0660098	-2.46634
ENSMUSG00000035757	selenoprotein O [Source:MGI Symbol;Acc:MGI:1919007]	Selenoo	protein_coding	-0.575909	0.0138476	1.85863	0.200546	38	37	26	65	84	141	62.3459	0.233996	-2.46119
ENSMUSG00000020790	ankyrin repeat and FYVE domain containing 1 [Source:MGI Symbol;Acc:MGI:1337008]	Ankfy1	protein_coding	-0.513029	0.0138535	1.85844	0.200546	326	669	641	715	1103	1181	741.691	0.20846	-2.46104
ENSMUSG00000037818	abhydrolase domain containing 18 [Source:MGI Symbol;Acc:MGI:1915468]	Abhd18	protein_coding	-0.495656	0.0138382	1.85892	0.200546	198	166	167	315	354	289	241.294	0.201369	-2.46144
ENSMUSG00000022828	general transcription factor II E, polypeptide 1 (alpha subunit) [Source:MGI Symbol;Acc:MGI:1921447]	Gtf2e1	protein_coding	-0.575008	0.0139486	1.85547	0.201743	29	164	93	278	305	204	169.05	0.233878	-2.45858
ENSMUSG00000084223	predicted gene 12244 [Source:MGI Symbol;Acc:MGI:3649493]	Gm12244	processed_pseudogene	0.532512	0.0139622	1.85505	0.201762	38	42	32	16	12	7	25.028	0.216624	2.45823
ENSMUSG00000042940	RIKEN cDNA 9230106D20 gene [Source:MGI Symbol;Acc:MGI:3045371]	9230106D20Rik	lincRNA	0.395729	0.0139844	1.85436	0.201905	41	10	24	2	0	2	14.3627	0.161018	2.45766
ENSMUSG00000102254	predicted gene 7496 [Source:MGI Symbol;Acc:MGI:3643469]	Gm7496	processed_pseudogene	0.528105	0.0140099	1.85357	0.202095	25	43	35	13	11	7	22.6124	0.214938	2.45701
ENSMUSG00000030877	major facilitator superfamily domain containing 13B [Source:MGI Symbol;Acc:MGI:1921716]	Mfsd13b	protein_coding	-0.445321	0.0140295	1.85296	0.2022	312	302	259	465	569	422	377.049	0.181282	-2.45651
ENSMUSG00000040746	ring finger protein 167 [Source:MGI Symbol;Acc:MGI:1917760]	Rnf167	protein_coding	-0.360667	0.0140485	1.85237	0.202296	755	984	981	1169	1672	1268	1103.94	0.14685	-2.45602
ENSMUSG00000114733	predicted gene 4815 [Source:MGI Symbol;Acc:MGI:3643439]	Gm4815	processed_pseudogene	0.420117	0.014076	1.85152	0.202514	361	534	446	360	396	316	397.909	0.171105	2.45532
ENSMUSG00000045327	RIKEN cDNA 6330549D23 gene [Source:MGI Symbol;Acc:MGI:2442586]	6330549D23Rik	transcribed_processed_pseudogene	0.462523	0.014095	1.85094	0.202609	339	578	421	332	306	364	385.978	0.188413	2.45483
ENSMUSG00000027716	transient receptor potential cation channel, subfamily C, member 3 [Source:MGI Symbol;Acc:MGI:109526]	Trpc3	protein_coding	-0.368525	0.0141356	1.84969	0.202837	0	0	0	17	50	20	13.0763	0.150185	-2.4538
ENSMUSG00000036611	endonuclease/exonuclease/phosphatase family domain containing 1 [Source:MGI Symbol;Acc:MGI:1914734]	Eepd1	protein_coding	-0.343256	0.0141321	1.84979	0.202837	849	1255	1091	1322	1868	1530	1277.98	0.139882	-2.45389
ENSMUSG00000116545	eukaryotic translation initiation factor 3, subunit E (Eif3e) pseudogene	AC102745.1	processed_pseudogene	0.426558	0.014178	1.84838	0.203268	21	15	17	2	3	1	10.337	0.173912	2.45272
ENSMUSG00000085134	predicted gene 11659 [Source:MGI Symbol;Acc:MGI:3649220]	Gm11659	antisense	-0.578046	0.0141916	1.84797	0.203285	27	33	32	91	70	76	52.8767	0.235709	-2.45238
ENSMUSG00000110882	predicted gene 7642 [Source:MGI Symbol;Acc:MGI:3646872]	Gm7642	processed_pseudogene	0.558177	0.0142298	1.8468	0.203476	114	122	111	70	85	59	93.724	0.227696	2.45141
ENSMUSG00000047508	methyl-CpG binding domain protein 3-like 2 [Source:MGI Symbol;Acc:MGI:2158460]	Mbd3l2	protein_coding	-0.26916	0.0142204	1.84709	0.203476	1561	1987	1849	2526	2632	2295	2091.27	0.109787	-2.45165
ENSMUSG00000075395	RIKEN cDNA A630010A05 gene [Source:MGI Symbol;Acc:MGI:3584518]	A630010A05Rik	protein_coding	0.510629	0.0143215	1.84401	0.204516	226	414	291	241	208	191	259.443	0.208497	2.4491
ENSMUSG00000055745	retrotransposon Gag like 6 [Source:MGI Symbol;Acc:MGI:2675858]	Rtl6	protein_coding	-0.4534	0.0143275	1.84383	0.204516	267	452	342	497	738	534	453.808	0.185141	-2.44895
ENSMUSG00000071532	predicted gene 10335 [Source:MGI Symbol;Acc:MGI:3641693]	Gm10335	processed_pseudogene	0.374193	0.0143471	1.84324	0.204618	18	14	24	0	1	0	10.1059	0.152828	2.44845
ENSMUSG00000034343	ubiquitin-conjugating enzyme E2F (putative) [Source:MGI Symbol;Acc:MGI:1915171]	Ube2f	protein_coding	0.478602	0.0144861	1.83905	0.206421	553	422	430	297	400	363	411.685	0.195749	2.44498
ENSMUSG00000041144	dynein, axonemal, heavy chain 7B [Source:MGI Symbol;Acc:MGI:2684953]	Dnah7b	protein_coding	0.514325	0.0145042	1.83851	0.206498	144	183	148	101	113	115	133.462	0.210399	2.44453
ENSMUSG00000061479	small nuclear ribonucleoprotein polypeptide A [Source:MGI Symbol;Acc:MGI:1855690]	Snrpa	protein_coding	0.440133	0.0145473	1.83722	0.206933	412	452	336	263	366	316	354.696	0.180127	2.44346
ENSMUSG00000061619	VMA21 vacuolar H+-ATPase homolog (S. cerevisiae), pseudogene [Source:MGI Symbol;Acc:MGI:3643145]	Vma21-ps	protein_coding	0.450226	0.0145805	1.83623	0.207226	30	41	33	11	1	4	20.6614	0.18432	2.44263
ENSMUSG00000096641	predicted gene 904 [Source:MGI Symbol;Acc:MGI:2685750]	Gm904	protein_coding	0.405533	0.0146201	1.83505	0.207608	15	11	24	1	2	1	9.52887	0.16609	2.44165
ENSMUSG00000069727	zinc finger protein 975 [Source:MGI Symbol;Acc:MGI:3648690]	Zfp975	protein_coding	0.573306	0.0146935	1.83287	0.20829	120	115	82	25	69	59	78.8416	0.234976	2.43985
ENSMUSG00000059058	translational machinery associated 7 homolog (S. cerevisiae), pseudogene [Source:MGI Symbol;Acc:MGI:3705453]	Tma7-ps	processed_pseudogene	0.514015	0.0146936	1.83287	0.20829	55	40	28	18	8	9	27.2975	0.210675	2.43985
ENSMUSG00000034101	catenin (cadherin associated protein), delta 1 [Source:MGI Symbol;Acc:MGI:105100]	Ctnnd1	protein_coding	-0.507222	0.0147442	1.83138	0.208522	128	142	154	203	287	293	194.465	0.207997	-2.4386
ENSMUSG00000031590	FSHD region gene 1 [Source:MGI Symbol;Acc:MGI:893597]	Frg1	protein_coding	-0.449458	0.0147481	1.83126	0.208522	540	548	357	715	968	741	624.5	0.184317	-2.43851
ENSMUSG00000030986	DEAH (Asp-Glu-Ala-His) box polypeptide 32 [Source:MGI Symbol;Acc:MGI:2141813]	Dhx32	protein_coding	-0.34676	0.0147331	1.83171	0.208522	1372	2166	1980	2421	3225	2521	2209.9	0.14218	-2.43887
ENSMUSG00000045598	zinc finger protein 553 [Source:MGI Symbol;Acc:MGI:2384725]	Zfp553	protein_coding	-0.335479	0.0147949	1.82989	0.209003	1172	1895	1584	1939	2481	2367	1847.91	0.13764	-2.43736
ENSMUSG00000035572	DDB1 and CUL4 associated factor 10 [Source:MGI Symbol;Acc:MGI:2140179]	Dcaf10	protein_coding	-0.46603	0.0148108	1.82942	0.209047	277	434	477	601	810	619	517.958	0.191233	-2.43697
ENSMUSG00000035239	neuraminidase 3 [Source:MGI Symbol;Acc:MGI:1355305]	Neu3	protein_coding	-0.568595	0.0148421	1.8285	0.20931	45	77	72	119	202	121	100.956	0.233393	-2.43621
ENSMUSG00000083864	predicted gene 13719 [Source:MGI Symbol;Acc:MGI:3649492]	Gm13719	processed_pseudogene	0.40791	0.0148753	1.82753	0.209597	429	436	424	303	399	357	389.047	0.167492	2.4354
ENSMUSG00000044976	WD repeat domain 72 [Source:MGI Symbol;Acc:MGI:3583957]	Wdr72	protein_coding	-0.565966	0.0149304	1.82593	0.210193	105	191	28	293	309	324	197.647	0.232519	-2.43406
ENSMUSG00000019935	solute carrier family 17 (sodium-dependent inorganic phosphate cotransporter), member 8 [Source:MGI Symbol;Acc:MGI:3039629]	Slc17a8	protein_coding	-0.374658	0.0150641	1.82206	0.211809	0	2	1	15	130	9	23.0246	0.154127	-2.43083
ENSMUSG00000035235	tripartite motif-containing 13 [Source:MGI Symbol;Acc:MGI:1913847]	Trim13	protein_coding	0.305744	0.015071	1.82186	0.211809	3439	4234	3302	3610	3091	3126	3435.81	0.125786	2.43067
ENSMUSG00000029022	migration and invasion inhibitory protein [Source:MGI Symbol;Acc:MGI:106506]	Miip	protein_coding	-0.456174	0.0151007	1.821	0.212044	366	342	252	536	589	500	418.95	0.187729	-2.42995
ENSMUSG00000043505	GTPase, IMAP family member 5 [Source:MGI Symbol;Acc:MGI:2442232]	Gimap5	protein_coding	-0.535592	0.0151675	1.81909	0.212254	73	95	99	165	211	151	127.491	0.220557	-2.42835
ENSMUSG00000049643	RIKEN cDNA 2310022A10 gene [Source:MGI Symbol;Acc:MGI:1913617]	2310022A10Rik	protein_coding	0.463563	0.015143	1.81979	0.212254	821	731	514	498	512	562	606.162	0.19085	2.42894
ENSMUSG00000024283	WW domain containing adaptor with coiled-coil [Source:MGI Symbol;Acc:MGI:2387357]	Wac	protein_coding	0.415013	0.0151608	1.81928	0.212254	593	663	537	370	581	508	536.767	0.170892	2.42851
ENSMUSG00000043453	melanoma antigen family A, 10 [Source:MGI Symbol;Acc:MGI:3588211]	Magea10	protein_coding	-0.348319	0.0151397	1.81988	0.212254	1138	1403	1054	1887	1593	1817	1447.25	0.143399	-2.42902
ENSMUSG00000024786	membrane anchored junction protein [Source:MGI Symbol;Acc:MGI:1923913]	Majin	protein_coding	-0.399605	0.0151941	1.81833	0.212445	2	2	0	13	26	35	11.9944	0.164601	-2.42772
ENSMUSG00000067338	tubulin, alpha 3B [Source:MGI Symbol;Acc:MGI:1095408]	Tuba3b	protein_coding	0.51702	0.0152273	1.81738	0.212728	836	2035	1182	695	804	1216	1109.18	0.213035	2.42693
ENSMUSG00000039068	zinc finger, ZZ domain containing 3 [Source:MGI Symbol;Acc:MGI:1920453]	Zzz3	protein_coding	0.403926	0.0152962	1.81542	0.21349	1869	1641	1537	1273	1240	1640	1532.29	0.166547	2.42529
ENSMUSG00000085436	zinc finger protein 335, opposite strand [Source:MGI Symbol;Acc:MGI:3649775]	Zfp335os	antisense	-0.392435	0.0153079	1.81508	0.21349	2	1	0	32	17	19	11.18	0.161828	-2.42501
ENSMUSG00000020672	syntrophin, gamma 2 [Source:MGI Symbol;Acc:MGI:1919541]	Sntg2	protein_coding	-0.559249	0.0153468	1.81398	0.21385	162	141	124	289	463	190	218.764	0.230705	-2.42409
ENSMUSG00000000701	T cell leukemia/lymphoma 1B, 5 [Source:MGI Symbol;Acc:MGI:1351635]	Tcl1b5	protein_coding	0.400611	0.0153604	1.8136	0.213858	1065	1425	875	873	1100	779	1006	0.165284	2.42377
ENSMUSG00000028559	oxysterol binding protein-like 9 [Source:MGI Symbol;Acc:MGI:1923784]	Osbpl9	protein_coding	-0.166234	0.0154241	1.8118	0.214562	5442	6408	5601	6980	8112	7228	6484.18	0.0686273	-2.42227
ENSMUSG00000021486	PRELI domain containing 1 [Source:MGI Symbol;Acc:MGI:1913744]	Prelid1	protein_coding	0.499946	0.0154901	1.80995	0.215298	191	318	232	182	191	148	208.312	0.206528	2.42071
ENSMUSG00000080840	predicted gene 11349 [Source:MGI Symbol;Acc:MGI:3652298]	Gm11349	processed_pseudogene	0.561325	0.0156352	1.8059	0.21713	47	67	45	23	29	17	38.1408	0.23221	2.41732
ENSMUSG00000058073	predicted gene 11189 [Source:MGI Symbol;Acc:MGI:3650984]	Gm11189	processed_pseudogene	0.548478	0.0156762	1.80476	0.217189	130	188	165	73	139	91	130.065	0.226984	2.41637
ENSMUSG00000063696	predicted pseudogene 8730 [Source:MGI Symbol;Acc:MGI:3644565]	Gm8730	processed_pseudogene	0.47819	0.0156791	1.80468	0.217189	287	368	307	277	216	211	276.959	0.197902	2.4163
ENSMUSG00000021288	kinesin light chain 1 [Source:MGI Symbol;Acc:MGI:107978]	Klc1	protein_coding	-0.339294	0.0156645	1.80508	0.217189	428	558	469	688	710	737	582.875	0.140399	-2.41664
ENSMUSG00000045973	solute carrier family 25, member 51 [Source:MGI Symbol;Acc:MGI:2684984]	Slc25a51	protein_coding	-0.374573	0.0156947	1.80425	0.217221	525	849	554	892	1065	957	780.774	0.155042	-2.41594
ENSMUSG00000054737	zinc finger protein 182 [Source:MGI Symbol;Acc:MGI:2442220]	Zfp182	protein_coding	-0.330715	0.0158075	1.80114	0.218596	938	1084	928	1531	1336	1426	1180.5	0.137037	-2.41333
ENSMUSG00000024985	transcription factor 7 like 2, T cell specific, HMG box [Source:MGI Symbol;Acc:MGI:1202879]	Tcf7l2	protein_coding	0.568007	0.0159432	1.79743	0.220101	125	130	239	75	125	65	127.747	0.235667	2.41021
ENSMUSG00000025745	hydroxyacyl-Coenzyme A dehydrogenase/3-ketoacyl-Coenzyme A thiolase/enoyl-Coenzyme A hydratase (trifunctional protein), alpha subunit [Source:MGI Symbol;Acc:MGI:2135593]	Hadha	protein_coding	-0.344966	0.0159371	1.79759	0.220101	768	811	888	1042	1394	1254	999.645	0.143118	-2.41035
ENSMUSG00000028300	C9orf72, member of C9orf72-SMCR8 complex [Source:MGI Symbol;Acc:MGI:1920455]	C9orf72	protein_coding	-0.535324	0.0159844	1.7963	0.220485	285	762	846	1070	1298	1338	896.141	0.222193	-2.40927
ENSMUSG00000107771	predicted gene 8956 [Source:MGI Symbol;Acc:MGI:3645919]	Gm8956	processed_pseudogene	0.499096	0.0160062	1.79571	0.2206	198	199	183	118	164	134	165.657	0.207199	2.40877
ENSMUSG00000062397	zinc finger protein 706 [Source:MGI Symbol;Acc:MGI:1915286]	Zfp706	protein_coding	0.217427	0.0160595	1.79427	0.221149	5075	5654	5099	4672	5913	4860	5143.48	0.0903099	2.40756
ENSMUSG00000068631	predicted gene 7676 [Source:MGI Symbol;Acc:MGI:3644053]	Gm7676	processed_pseudogene	0.565707	0.0160884	1.79349	0.221342	57	78	57	32	24	35	47.4894	0.235035	2.4069
ENSMUSG00000047534	MIS18 binding protein 1 [Source:MGI Symbol;Acc:MGI:2145099]	Mis18bp1	protein_coding	-0.260402	0.0161005	1.79316	0.221342	1223	1669	1258	1737	2088	1859	1594.89	0.108202	-2.40663
ENSMUSG00000024948	mitogen-activated protein kinase kinase kinase kinase 2 [Source:MGI Symbol;Acc:MGI:1346883]	Map4k2	protein_coding	0.524725	0.0161234	1.79254	0.221471	567	506	330	226	324	399	392.368	0.21808	2.40611
ENSMUSG00000084086	predicted gene 5761 [Source:MGI Symbol;Acc:MGI:3647843]	Gm5761	processed_pseudogene	0.508835	0.0161414	1.79206	0.221532	184	173	177	109	134	132	151.749	0.211512	2.4057
ENSMUSG00000040213	kynurenine aminotransferase 3 [Source:MGI Symbol;Acc:MGI:2677849]	Kyat3	protein_coding	-0.49488	0.0162265	1.78977	0.22206	306	386	210	617	496	490	405.148	0.205876	-2.40378
ENSMUSG00000024911	fibroblast growth factor (acidic) intracellular binding protein [Source:MGI Symbol;Acc:MGI:1926233]	Fibp	protein_coding	0.440405	0.0162069	1.7903	0.22206	382	523	362	315	397	274	371.225	0.18318	2.40422
ENSMUSG00000001376	VPS50 EARP/GARPII complex subunit [Source:MGI Symbol;Acc:MGI:1920538]	Vps50	protein_coding	-0.309036	0.0162119	1.79017	0.22206	1517	2108	2073	2477	2734	2932	2247.81	0.128545	-2.40411
ENSMUSG00000082743	predicted gene 12988 [Source:MGI Symbol;Acc:MGI:3650876]	Gm12988	processed_pseudogene	0.210403	0.0162341	1.78957	0.22206	6009	7510	5799	6031	6323	6423	6262.38	0.0875361	2.40361
ENSMUSG00000048310	protein serine kinase H1 [Source:MGI Symbol;Acc:MGI:3528383]	Pskh1	protein_coding	-0.395042	0.0162747	1.78849	0.222247	858	1191	696	1454	1335	1443	1129.78	0.164416	-2.4027
ENSMUSG00000047911	nucleophosmin/nucleoplasmin 2 [Source:MGI Symbol;Acc:MGI:1890811]	Npm2	protein_coding	-0.235202	0.0162749	1.78848	0.222247	11496	14934	12104	18015	16618	16881	14677.2	0.0978912	-2.40269
ENSMUSG00000059119	nucleosome assembly protein 1-like 4 [Source:MGI Symbol;Acc:MGI:1316687]	Nap1l4	protein_coding	-0.195806	0.0163275	1.78708	0.22278	6046	8377	6633	8541	9581	9236	7872.24	0.0815347	-2.40151
ENSMUSG00000014905	DnaJ heat shock protein family (Hsp40) member B9 [Source:MGI Symbol;Acc:MGI:1351618]	Dnajb9	protein_coding	0.55756	0.0163767	1.78577	0.22308	164	121	124	78	102	64	109.987	0.232277	2.40041
ENSMUSG00000045036	transmembrane protein 232 [Source:MGI Symbol;Acc:MGI:2685786]	Tmem232	protein_coding	-0.386261	0.0163745	1.78583	0.22308	1029	1737	1015	1877	1841	2029	1538.39	0.160911	-2.40046
ENSMUSG00000020100	solute carrier family 29 (nucleoside transporters), member 3 [Source:MGI Symbol;Acc:MGI:1918529]	Slc29a3	protein_coding	-0.565573	0.0164328	1.78429	0.223658	45	161	83	153	304	256	157.238	0.235738	-2.39916
ENSMUSG00000089844	RIKEN cDNA A530032D15Rik gene [Source:MGI Symbol;Acc:MGI:3037746]	A530032D15Rik	protein_coding	0.500861	0.0164626	1.7835	0.223877	37	31	22	7	12	7	19.8337	0.208823	2.3985
ENSMUSG00000032349	ELOVL family member 5, elongation of long chain fatty acids (yeast) [Source:MGI Symbol;Acc:MGI:1916051]	Elovl5	protein_coding	-0.278193	0.0165078	1.78231	0.224306	5322	8271	7136	9129	10814	8824	8018.39	0.116035	-2.39749
ENSMUSG00000043024	predicted gene 16433 [Source:MGI Symbol;Acc:MGI:3645626]	Gm16433	processed_pseudogene	0.484618	0.0166313	1.77907	0.225797	454	525	610	332	539	302	457.71	0.202366	2.39476
ENSMUSG00000045822	zinc finger SWIM-type containing 3 [Source:MGI Symbol;Acc:MGI:1914788]	Zswim3	protein_coding	-0.18133	0.0166819	1.77775	0.226297	6295	7416	6329	7688	9596	8669	7488.93	0.0757549	-2.39364
ENSMUSG00000034566	ATP synthase, H+ transporting, mitochondrial F0 complex, subunit D [Source:MGI Symbol;Acc:MGI:1918929]	Atp5h	protein_coding	0.412704	0.0167466	1.77607	0.226987	416	697	475	414	446	407	469.242	0.172519	2.39222
ENSMUSG00000081965	predicted gene 11620 [Source:MGI Symbol;Acc:MGI:3650770]	Gm11620	processed_pseudogene	0.532766	0.0168323	1.77386	0.227832	113	132	118	68	92	77	99.8322	0.222882	2.39035
ENSMUSG00000038668	lysophosphatidic acid receptor 1 [Source:MGI Symbol;Acc:MGI:108429]	Lpar1	protein_coding	-0.473972	0.0168438	1.77356	0.227832	192	320	315	391	578	469	363.561	0.198306	-2.3901
ENSMUSG00000015112	solute carrier family 25 (mitochondrial carrier, adenine nucleotide translocator), member 13 [Source:MGI Symbol;Acc:MGI:1354721]	Slc25a13	protein_coding	-0.403217	0.0168507	1.77338	0.227832	440	798	517	858	978	894	722.055	0.168713	-2.38995
ENSMUSG00000109176	zinc finger protein 264 [Source:MGI Symbol;Acc:MGI:2151059]	Zfp264	transcribed_unprocessed_pseudogene	-0.524921	0.0168663	1.77298	0.227855	16	21	9	49	89	35	34.2144	0.219668	-2.38961
ENSMUSG00000040738	integrator complex subunit 8 [Source:MGI Symbol;Acc:MGI:1919906]	Ints8	protein_coding	-0.247486	0.0169069	1.77194	0.228215	1473	1731	1662	2190	2315	2117	1872.39	0.103606	-2.38873
ENSMUSG00000032097	DEAD (Asp-Glu-Ala-Asp) box polypeptide 6 [Source:MGI Symbol;Acc:MGI:104976]	Ddx6	protein_coding	-0.559687	0.0169849	1.76994	0.229079	58	99	71	117	266	144	119.121	0.23447	-2.38704
ENSMUSG00000040147	monoamine oxidase B [Source:MGI Symbol;Acc:MGI:96916]	Maob	protein_coding	-0.483881	0.0170009	1.76953	0.229107	287	317	338	380	757	558	423.095	0.202742	-2.38669
ENSMUSG00000034501	pecanex homolog 4 [Source:MGI Symbol;Acc:MGI:1914958]	Pcnx4	protein_coding	-0.545623	0.0170151	1.76917	0.22911	211	594	555	1062	672	1022	662.844	0.22864	-2.38638
ENSMUSG00000100774	predicted gene 7329 [Source:MGI Symbol;Acc:MGI:3646271]	Gm7329	processed_pseudogene	0.460655	0.0171131	1.76667	0.23024	23	20	23	6	5	3	13.839	0.193206	2.38427
ENSMUSG00000036672	centromere protein T [Source:MGI Symbol;Acc:MGI:2443939]	Cenpt	protein_coding	-0.538645	0.0171326	1.76618	0.230266	158	436	309	428	820	566	429.974	0.225956	-2.38385
ENSMUSG00000042594	SH2B adaptor protein 3 [Source:MGI Symbol;Acc:MGI:893598]	Sh2b3	protein_coding	0.291372	0.0171432	1.76591	0.230266	1459	1580	1643	1337	1447	1507	1483.38	0.122239	2.38362
ENSMUSG00000079111	KDEL (Lys-Asp-Glu-Leu) endoplasmic reticulum protein retention receptor 2 [Source:MGI Symbol;Acc:MGI:1914163]	Kdelr2	protein_coding	0.303685	0.0172318	1.76367	0.231268	1967	2103	1665	1778	1736	1663	1803.9	0.127506	2.38172
ENSMUSG00000091455	otogelin-like [Source:MGI Symbol;Acc:MGI:3647600]	Otogl	protein_coding	-0.350062	0.0173434	1.76087	0.232574	0	0	0	10	49	32	13.6468	0.147125	-2.37935
ENSMUSG00000037563	ribosomal protein S16 [Source:MGI Symbol;Acc:MGI:98118]	Rps16	protein_coding	0.559073	0.0175893	1.75475	0.235429	80	66	56	32	39	31	51.356	0.235483	2.37415
ENSMUSG00000028648	NADH:ubiquinone oxidoreductase core subunit S5 [Source:MGI Symbol;Acc:MGI:1890889]	Ndufs5	protein_coding	0.520864	0.0176137	1.75415	0.235429	284	333	191	204	153	177	223.614	0.219437	2.37364
ENSMUSG00000011463	carboxypeptidase B1 (tissue) [Source:MGI Symbol;Acc:MGI:1923953]	Cpb1	protein_coding	-0.513611	0.0176018	1.75444	0.235429	109	193	151	222	374	259	208.591	0.216358	-2.37389
ENSMUSG00000032046	abhydrolase domain containing 12 [Source:MGI Symbol;Acc:MGI:1923442]	Abhd12	protein_coding	-0.293938	0.0176059	1.75434	0.235429	2235	3248	2973	4025	3824	4020	3305.02	0.123826	-2.3738
ENSMUSG00000026036	Ngg1 interacting factor 3-like 1 (S. pombe) [Source:MGI Symbol;Acc:MGI:1929485]	Nif3l1	protein_coding	-0.529589	0.0177815	1.75003	0.237478	339	387	196	716	428	653	440.843	0.223442	-2.37014
ENSMUSG00000043110	leucine rich repeat neuronal 4 [Source:MGI Symbol;Acc:MGI:2445154]	Lrrn4	protein_coding	-0.435336	0.0178736	1.74779	0.238513	442	632	458	583	995	945	651.089	0.183824	-2.36823
ENSMUSG00000008398	ELK3, member of ETS oncogene family [Source:MGI Symbol;Acc:MGI:101762]	Elk3	protein_coding	0.414987	0.0178904	1.74738	0.238544	334	398	327	283	322	247	316.021	0.175257	2.36788
ENSMUSG00000027487	CDK5 regulatory subunit associated protein 1 [Source:MGI Symbol;Acc:MGI:1914221]	Cdk5rap1	protein_coding	-0.322175	0.0179657	1.74556	0.239206	841	1120	1007	1351	1349	1587	1179.25	0.13615	-2.36632
ENSMUSG00000042851	zinc finger CCCH type containing 6 [Source:MGI Symbol;Acc:MGI:1926001]	Zc3h6	protein_coding	-0.242329	0.0179693	1.74547	0.239206	7146	7331	7136	9473	11115	8897	8330.6	0.10241	-2.36625
ENSMUSG00000044573	acid phosphatase 1, soluble [Source:MGI Symbol;Acc:MGI:87881]	Acp1	protein_coding	0.533032	0.0180144	1.74438	0.239612	409	710	261	276	255	331	369.303	0.225353	2.36532
ENSMUSG00000083749	predicted gene 13100 [Source:MGI Symbol;Acc:MGI:3650205]	Gm13100	unprocessed_pseudogene	0.55633	0.0181354	1.74147	0.239822	88	196	111	83	76	50	99.7521	0.235449	2.36284
ENSMUSG00000030513	proprotein convertase subtilisin/kexin type 6 [Source:MGI Symbol;Acc:MGI:102897]	Pcsk6	protein_coding	0.469624	0.0181352	1.74148	0.239822	351	543	290	266	330	275	337.885	0.198753	2.36285
ENSMUSG00000062762	etoposide induced 2.4 mRNA [Source:MGI Symbol;Acc:MGI:108090]	Ei24	protein_coding	-0.427555	0.0180836	1.74271	0.239822	276	341	377	459	553	612	423.848	0.180868	-2.3639
ENSMUSG00000115289	predicted gene, 49164 [Source:MGI Symbol;Acc:MGI:6118590]	Gm49164	lincRNA	-0.40179	0.0181473	1.74119	0.239822	255	316	229	402	452	405	333.148	0.170063	-2.3626
ENSMUSG00000047721	bolA-like 2 (E. coli) [Source:MGI Symbol;Acc:MGI:1913412]	Bola2	protein_coding	-0.386036	0.0181348	1.74149	0.239822	272	303	282	420	498	415	355.073	0.163377	-2.36285
ENSMUSG00000068739	seryl-aminoacyl-tRNA synthetase [Source:MGI Symbol;Acc:MGI:102809]	Sars	protein_coding	-0.28257	0.0180479	1.74357	0.239822	1712	2416	2014	2902	2707	2921	2386.51	0.119499	-2.36463
ENSMUSG00000029030	transformation related protein 63 regulated like [Source:MGI Symbol;Acc:MGI:1915058]	Tprgl	protein_coding	-0.277285	0.0180944	1.74246	0.239822	2835	4114	3226	4659	4411	4977	3937.24	0.117311	-2.36368
ENSMUSG00000020869	leucine rich repeat containing 59 [Source:MGI Symbol;Acc:MGI:2138133]	Lrrc59	protein_coding	-0.232684	0.0181016	1.74228	0.239822	4195	5760	5389	6316	7275	6992	5841.11	0.0984476	-2.36353
ENSMUSG00000074194	zinc finger protein 791 [Source:MGI Symbol;Acc:MGI:3648473]	Zfp791	protein_coding	-0.442097	0.0181967	1.74001	0.240282	1039	2055	1799	2102	3589	2422	2080.88	0.187203	-2.36159
ENSMUSG00000035329	F-box protein 33 [Source:MGI Symbol;Acc:MGI:1917861]	Fbxo33	protein_coding	-0.263786	0.0182353	1.73909	0.240598	1963	2254	1873	2422	3325	2695	2358.49	0.111735	-2.3608
ENSMUSG00000034285	nipsnap homolog 1 [Source:MGI Symbol;Acc:MGI:1278344]	Nipsnap1	protein_coding	-0.361864	0.0182762	1.73811	0.24075	915	1593	1136	1564	2165	1731	1465.02	0.153334	-2.35997
ENSMUSG00000032397	timeless interacting protein [Source:MGI Symbol;Acc:MGI:1921571]	Tipin	protein_coding	-0.22194	0.0182701	1.73826	0.24075	1498	1895	1711	2173	2411	2212	1937.36	0.0940383	-2.3601
ENSMUSG00000113690	predicted gene, 36501 [Source:MGI Symbol;Acc:MGI:5595660]	Gm36501	processed_pseudogene	0.478501	0.0183841	1.73556	0.241976	17	29	45	8	10	6	19.5948	0.202945	2.35779
ENSMUSG00000092029	predicted gene 9027 [Source:MGI Symbol;Acc:MGI:3646681]	Gm9027	processed_pseudogene	0.476671	0.0184143	1.73485	0.242179	16	46	36	5	8	12	20.5777	0.202221	2.35718
ENSMUSG00000026065	solute carrier family 9 (sodium/hydrogen exchanger), member 4 [Source:MGI Symbol;Acc:MGI:105074]	Slc9a4	protein_coding	0.555375	0.0184809	1.73328	0.242861	364	318	302	221	72	219	254.305	0.235744	2.35584
ENSMUSG00000054408	signal peptidase complex subunit 3 homolog (S. cerevisiae) [Source:MGI Symbol;Acc:MGI:1923937]	Spcs3	protein_coding	-0.503094	0.018515	1.73248	0.243114	17	15	41	127	38	130	59.486	0.213614	-2.35515
ENSMUSG00000039917	rhomboid domain containing 2 [Source:MGI Symbol;Acc:MGI:1915612]	Rhbdd2	protein_coding	-0.445661	0.0185719	1.73114	0.243665	352	392	337	485	827	517	467.928	0.18932	-2.35401
ENSMUSG00000027424	mitochondrial genome maintenance exonuclease 1 [Source:MGI Symbol;Acc:MGI:1921778]	Mgme1	protein_coding	-0.528549	0.0186449	1.72944	0.244427	206	532	572	664	1065	868	622.529	0.22467	-2.35256
ENSMUSG00000096255	dynein light chain Tctex-type 1B [Source:MGI Symbol;Acc:MGI:98643]	Dynlt1b	protein_coding	0.543666	0.0186968	1.72823	0.244741	90	109	82	57	59	53	75.0688	0.231198	2.35152
ENSMUSG00000050424	paraneoplastic antigen family 5 [Source:MGI Symbol;Acc:MGI:2180566]	Pnma5	protein_coding	0.37052	0.0186987	1.72819	0.244741	971	1054	1216	934	850	960	994.154	0.157569	2.35148
ENSMUSG00000031534	small integral membrane protein 19 [Source:MGI Symbol;Acc:MGI:2142501]	Smim19	protein_coding	0.354296	0.0187191	1.72771	0.244813	557	596	496	440	498	484	507.867	0.150695	2.35108
ENSMUSG00000026933	calmodulin regulated spectrin-associated protein 1 [Source:MGI Symbol;Acc:MGI:3036242]	Camsap1	protein_coding	0.360411	0.0187505	1.72699	0.245028	3043	2934	3319	2112	2731	3187	2872.53	0.153337	2.35045
ENSMUSG00000078502	predicted gene 13212 [Source:MGI Symbol;Acc:MGI:3651014]	Gm13212	protein_coding	0.439097	0.0188036	1.72576	0.245525	39	48	11	9	3	6	19.7549	0.186897	2.3494
ENSMUSG00000067870	ribosomal protein L31, pseudogene 8 [Source:MGI Symbol;Acc:MGI:3647726]	Rpl31-ps8	processed_pseudogene	0.544439	0.0188375	1.72498	0.245773	125	119	92	71	60	70	90.1936	0.231801	2.34873
ENSMUSG00000018796	acyl-CoA synthetase long-chain family member 1 [Source:MGI Symbol;Acc:MGI:102797]	Acsl1	protein_coding	-0.358572	0.0188594	1.72447	0.245862	853	1171	1281	1494	1690	1788	1342.76	0.152694	-2.3483
ENSMUSG00000028161	protein phosphatase 3, catalytic subunit, alpha isoform [Source:MGI Symbol;Acc:MGI:107164]	Ppp3ca	protein_coding	0.494738	0.018944	1.72253	0.246681	230	321	319	231	166	211	246.201	0.210829	2.34663
ENSMUSG00000046341	predicted gene 11223 [Source:MGI Symbol;Acc:MGI:3651631]	Gm11223	processed_pseudogene	0.432457	0.0189674	1.72199	0.246681	283	366	283	220	295	217	274.463	0.184325	2.34617
ENSMUSG00000002565	scinderin [Source:MGI Symbol;Acc:MGI:1306794]	Scin	protein_coding	-0.344238	0.0189586	1.72219	0.246681	669	1056	918	1305	1385	1201	1058.05	0.146713	-2.34634
ENSMUSG00000021714	centromere protein K [Source:MGI Symbol;Acc:MGI:1926210]	Cenpk	protein_coding	-0.487194	0.019032	1.72052	0.246934	404	506	463	1061	582	785	619.378	0.207767	-2.3449
ENSMUSG00000020783	nuclear cap binding subunit 3 [Source:MGI Symbol;Acc:MGI:1914124]	Ncbp3	protein_coding	-0.435058	0.0190177	1.72084	0.246934	485	666	503	788	1248	701	704.846	0.185511	-2.34518
ENSMUSG00000048410	zinc finger protein 407 [Source:MGI Symbol;Acc:MGI:2685179]	Zfp407	protein_coding	-0.347011	0.0190218	1.72075	0.246934	769	961	915	1025	1567	1368	1067.88	0.147972	-2.3451
ENSMUSG00000042078	SV2 related protein [Source:MGI Symbol;Acc:MGI:1915916]	Svop	protein_coding	-0.436946	0.0190613	1.71985	0.247118	153	195	166	252	299	298	220.214	0.186384	-2.34433
ENSMUSG00000017747	GH3 domain containing [Source:MGI Symbol;Acc:MGI:1931556]	Ghdc	protein_coding	0.514589	0.0190777	1.71947	0.247136	230	262	150	133	139	158	178.206	0.219534	2.34401
ENSMUSG00000097086	predicted gene 7672 [Source:MGI Symbol;Acc:MGI:3647232]	Gm7672	processed_pseudogene	0.51652	0.0191684	1.71741	0.247712	37	43	43	11	24	10	28.3542	0.220524	2.34224
ENSMUSG00000034324	transmembrane protein 132C [Source:MGI Symbol;Acc:MGI:2443061]	Tmem132c	protein_coding	-0.328836	0.0191827	1.71709	0.247712	605	736	756	1020	1109	940	839.671	0.14041	-2.34196
ENSMUSG00000041459	TAR DNA binding protein [Source:MGI Symbol;Acc:MGI:2387629]	Tardbp	protein_coding	0.315703	0.0191495	1.71784	0.247712	2874	3150	2446	2151	3146	2322	2647.64	0.134766	2.34261
ENSMUSG00000019813	centrosomal protein 57-like 1 [Source:MGI Symbol;Acc:MGI:1915511]	Cep57l1	protein_coding	-0.302769	0.0191723	1.71732	0.247712	2343	3313	2544	3482	4840	3372	3214.3	0.129269	-2.34216
ENSMUSG00000026127	IMP4, U3 small nucleolar ribonucleoprotein [Source:MGI Symbol;Acc:MGI:106572]	Imp4	protein_coding	-0.244177	0.0192023	1.71665	0.24777	2609	3654	2880	3892	4724	3752	3488.66	0.104279	-2.34158
ENSMUSG00000099517	histone cluster 1, H3g [Source:MGI Symbol;Acc:MGI:2145541]	Hist1h3g	protein_coding	0.509761	0.0192674	1.71518	0.248414	39	36	27	14	11	10	23.3712	0.217817	2.34032
ENSMUSG00000008090	fibroblast growth factor receptor-like 1 [Source:MGI Symbol;Acc:MGI:2150920]	Fgfrl1	protein_coding	-0.395183	0.0193853	1.71253	0.249738	0	11	2	26	65	51	23.598	0.169023	-2.33804
ENSMUSG00000114398	predicted gene, 20763 [Source:MGI Symbol;Acc:MGI:5434119]	Gm20763	processed_pseudogene	0.533732	0.0194441	1.71121	0.250102	159	271	312	108	204	156	200.332	0.228393	2.33691
ENSMUSG00000021556	golgi membrane protein 1 [Source:MGI Symbol;Acc:MGI:1917329]	Golm1	protein_coding	-0.260259	0.0194379	1.71135	0.250102	2252	2918	2554	2913	4097	3641	2978.8	0.111363	-2.33702
ENSMUSG00000031214	oligophrenin 1 [Source:MGI Symbol;Acc:MGI:2151070]	Ophn1	protein_coding	-0.253865	0.019496	1.71006	0.250573	2009	2202	2199	2816	2907	3063	2479.93	0.108679	-2.33591
ENSMUSG00000105603	predicted gene, 32996 [Source:MGI Symbol;Acc:MGI:5592155]	Gm32996	processed_pseudogene	0.503224	0.0195295	1.70931	0.25073	443	345	254	243	237	246	296.39	0.215489	2.33527
ENSMUSG00000062797	heat shock protein nuclear import factor [Source:MGI Symbol;Acc:MGI:96738]	Hikeshi	protein_coding	-0.293502	0.0195402	1.70907	0.25073	728	957	875	1092	1387	1148	1003.18	0.125694	-2.33506
ENSMUSG00000040359	UFM1 specific ligase 1 [Source:MGI Symbol;Acc:MGI:1914740]	Ufl1	protein_coding	-0.2781	0.0195541	1.70876	0.25073	1008	1369	1072	1472	1855	1481	1337.79	0.119111	-2.3348
ENSMUSG00000081087	ribosomal protein S15A, pseudogene 7 [Source:MGI Symbol;Acc:MGI:3650538]	Rps15a-ps7	processed_pseudogene	0.547434	0.0195869	1.70803	0.250954	84	63	84	44	27	41	58.5193	0.234531	2.33417
ENSMUSG00000018446	complement component 1, q subcomponent binding protein [Source:MGI Symbol;Acc:MGI:1194505]	C1qbp	protein_coding	0.317738	0.0196659	1.70629	0.25177	1343	1839	1449	1381	1240	1465	1437.49	0.136212	2.33266
ENSMUSG00000035683	maternal embryonic leucine zipper kinase [Source:MGI Symbol;Acc:MGI:106924]	Melk	protein_coding	-0.283647	0.0197432	1.70458	0.252562	3272	3955	2907	4499	5625	4109	3951.37	0.121675	-2.33119
ENSMUSG00000019806	androgen-induced 1 [Source:MGI Symbol;Acc:MGI:1913503]	Aig1	protein_coding	-0.311029	0.0197811	1.70375	0.25285	1171	1409	960	1647	1763	1662	1398.43	0.133462	-2.33047
ENSMUSG00000025157	zinc finger, DHHC domain containing 16 [Source:MGI Symbol;Acc:MGI:1921418]	Zdhhc16	protein_coding	-0.463444	0.0198304	1.70267	0.253282	195	377	285	521	503	430	372.097	0.198942	-2.32954
ENSMUSG00000106239	predicted gene 9260 [Source:MGI Symbol;Acc:MGI:3645725]	Gm9260	processed_pseudogene	0.548045	0.0199305	1.70048	0.254362	51	96	66	32	32	42	53.0185	0.23545	2.32765
ENSMUSG00000007892	ribosomal protein, large, P1 [Source:MGI Symbol;Acc:MGI:1927099]	Rplp1	protein_coding	0.416777	0.019984	1.69932	0.254847	603	594	562	539	461	408	527.413	0.179132	2.32665
ENSMUSG00000040918	solute carrier family 19 (thiamine transporter), member 2 [Source:MGI Symbol;Acc:MGI:1928761]	Slc19a2	protein_coding	0.480411	0.020054	1.6978	0.25554	78	23	64	13	10	26	37.6566	0.206599	2.32534
ENSMUSG00000032307	ubiquitin-conjugating enzyme E2Q family member 2 [Source:MGI Symbol;Acc:MGI:2388672]	Ube2q2	protein_coding	0.450076	0.0202285	1.69404	0.257561	424	677	486	422	323	444	459.029	0.193824	2.32208
ENSMUSG00000048126	collagen, type VI, alpha 3 [Source:MGI Symbol;Acc:MGI:88461]	Col6a3	protein_coding	-0.367756	0.020244	1.6937	0.257561	469	762	597	771	1045	951	740.652	0.158393	-2.32179
ENSMUSG00000062168	protein phosphatase with EF hand calcium-binding domain 1 [Source:MGI Symbol;Acc:MGI:1097157]	Ppef1	protein_coding	-0.481328	0.0202799	1.69293	0.257647	208	444	398	587	580	677	465.724	0.207368	-2.32113
ENSMUSG00000109255	predicted gene 7407 [Source:MGI Symbol;Acc:MGI:3647246]	Gm7407	processed_pseudogene	0.36092	0.0202822	1.69288	0.257647	579	663	511	483	484	525	536.639	0.155496	2.32109
ENSMUSG00000058835	abl-interactor 1 [Source:MGI Symbol;Acc:MGI:104913]	Abi1	protein_coding	-0.303068	0.0203068	1.69236	0.257759	1668	1558	1747	2255	2525	2386	1980.57	0.130597	-2.32063
ENSMUSG00000002475	abhydrolase domain containing 3 [Source:MGI Symbol;Acc:MGI:2147183]	Abhd3	protein_coding	-0.420717	0.0203229	1.69201	0.257764	303	439	290	502	686	479	434.042	0.181318	-2.32033
ENSMUSG00000081459	LLP homolog, pseudogene 1 [Source:MGI Symbol;Acc:MGI:3649506]	Llph-ps1	processed_pseudogene	0.344793	0.020373	1.69095	0.258199	16	17	16	1	0	0	8.76417	0.148656	2.31941
ENSMUSG00000022240	catenin (cadherin associated protein), delta 2 [Source:MGI Symbol;Acc:MGI:1195966]	Ctnnd2	protein_coding	0.541969	0.0204258	1.68982	0.258669	123	61	104	53	54	33	73.3792	0.233765	2.31843
ENSMUSG00000059810	regulator of G-protein signaling 3 [Source:MGI Symbol;Acc:MGI:1354734]	Rgs3	protein_coding	0.402382	0.0205502	1.68718	0.259947	316	396	359	249	302	321	321.107	0.173729	2.31615
ENSMUSG00000039396	nei like 3 (E. coli) [Source:MGI Symbol;Acc:MGI:2384588]	Neil3	protein_coding	-0.24899	0.0205584	1.68701	0.259947	4171	5447	3915	6188	6590	5565	5179.86	0.107509	-2.316
ENSMUSG00000006058	SNF8, ESCRT-II complex subunit, homolog (S. cerevisiae) [Source:MGI Symbol;Acc:MGI:1343161]	Snf8	protein_coding	0.485544	0.0205915	1.68631	0.259964	231	343	195	167	217	162	216.584	0.209703	2.31539
ENSMUSG00000031488	RAB11 family interacting protein 1 (class I) [Source:MGI Symbol;Acc:MGI:1923017]	Rab11fip1	protein_coding	-0.315703	0.0205873	1.6864	0.259964	755	1011	1018	1188	1484	1355	1104.47	0.136345	-2.31547
ENSMUSG00000029363	replication factor C (activator 1) 5 [Source:MGI Symbol;Acc:MGI:1919401]	Rfc5	protein_coding	0.315958	0.0207132	1.68375	0.261298	730	852	697	613	789	637	711.125	0.136591	2.31317
ENSMUSG00000081875	predicted gene 15223 [Source:MGI Symbol;Acc:MGI:3705339]	Gm15223	processed_pseudogene	0.354404	0.0209174	1.67949	0.263671	12	16	16	1	1	0	7.98909	0.153457	2.30947
ENSMUSG00000081729	heat shock protein 9, pseudogene 1 [Source:MGI Symbol;Acc:MGI:96246]	Hspa9-ps1	processed_pseudogene	0.243742	0.0209623	1.67856	0.264035	1067	1311	1119	1042	1203	1076	1121.42	0.105577	2.30866
ENSMUSG00000040964	Rho guanine nucleotide exchange factor (GEF) 10-like [Source:MGI Symbol;Acc:MGI:1920004]	Arhgef10l	protein_coding	-0.540568	0.0210263	1.67724	0.264637	27	88	36	104	124	161	85.2644	0.234264	-2.30751
ENSMUSG00000052485	transmembrane protein 171 [Source:MGI Symbol;Acc:MGI:2685751]	Tmem171	protein_coding	-0.439398	0.0210661	1.67642	0.264677	542	676	436	799	1248	720	709.896	0.19048	-2.3068
ENSMUSG00000028696	IAP promoted placental gene [Source:MGI Symbol;Acc:MGI:96581]	Ipp	protein_coding	0.424338	0.0210458	1.67684	0.264677	970	770	1005	639	717	845	826.089	0.183922	2.30716
ENSMUSG00000020087	trypsin domain containing 1 [Source:MGI Symbol;Acc:MGI:1919017]	Tysnd1	protein_coding	-0.415287	0.0210779	1.67617	0.264677	740	708	827	920	1628	1187	970.383	0.180044	-2.30659
ENSMUSG00000043913	coiled-coil domain containing 60 [Source:MGI Symbol;Acc:MGI:2141043]	Ccdc60	protein_coding	-0.454576	0.0211805	1.67406	0.265762	222	434	301	516	494	592	412.069	0.197235	-2.30475
ENSMUSG00000030203	dual specificity phosphatase 16 [Source:MGI Symbol;Acc:MGI:1917936]	Dusp16	protein_coding	-0.507992	0.0215325	1.66691	0.269559	99	189	104	205	301	236	180.703	0.221009	-2.29851
ENSMUSG00000026457	adiponectin receptor 1 [Source:MGI Symbol;Acc:MGI:1919924]	Adipor1	protein_coding	-0.368326	0.0215174	1.66721	0.269559	994	1863	1332	2120	2317	1856	1690.17	0.160227	-2.29878
ENSMUSG00000048485	zinc finger and BTB domain containing 8b [Source:MGI Symbol;Acc:MGI:2387181]	Zbtb8b	protein_coding	-0.344811	0.0215118	1.66732	0.269559	1408	1691	1643	2394	1982	2637	1916.69	0.149991	-2.29888
ENSMUSG00000026749	NIMA (never in mitosis gene a)-related expressed kinase 6 [Source:MGI Symbol;Acc:MGI:1891638]	Nek6	protein_coding	0.411736	0.0216274	1.665	0.270541	94	72	72	18	0	21	48.4072	0.179261	2.29685
ENSMUSG00000044065	predicted pseudogene 9788 [Source:MGI Symbol;Acc:MGI:3704496]	Gm9788	processed_pseudogene	0.472187	0.0217123	1.66329	0.271396	172	242	167	138	153	131	165.746	0.205714	2.29536
ENSMUSG00000010755	cysteinyl-tRNA synthetase [Source:MGI Symbol;Acc:MGI:1351477]	Cars	protein_coding	-0.401324	0.0217874	1.6618	0.271919	840	1006	1335	1519	2046	1523	1338.43	0.174941	-2.29405
ENSMUSG00000013415	insulin-like growth factor 2 mRNA binding protein 1 [Source:MGI Symbol;Acc:MGI:1890357]	Igf2bp1	protein_coding	-0.348313	0.021785	1.66184	0.271919	2	0	0	19	39	17	11.7402	0.15183	-2.2941
ENSMUSG00000062270	mortality factor 4 like 1 [Source:MGI Symbol;Acc:MGI:1096551]	Morf4l1	protein_coding	0.512434	0.0218106	1.66133	0.271945	35	86	72	16	42	17	44.4242	0.223414	2.29365
ENSMUSG00000097194	RIKEN cDNA 9330175E14 gene [Source:MGI Symbol;Acc:MGI:2443913]	9330175E14Rik	lincRNA	0.512365	0.0218226	1.66109	0.271945	156	255	145	131	107	123	151.74	0.223405	2.29344
ENSMUSG00000024127	prolyl endopeptidase-like [Source:MGI Symbol;Acc:MGI:2441932]	Prepl	protein_coding	-0.321047	0.0218913	1.65973	0.272594	1123	1855	1527	2177	2298	2005	1778.59	0.140058	-2.29225
ENSMUSG00000025078	NHL repeat containing 2 [Source:MGI Symbol;Acc:MGI:1914116]	Nhlrc2	protein_coding	-0.433088	0.0220545	1.6565	0.274416	490	769	924	1020	1272	1317	935.249	0.189168	-2.28943
ENSMUSG00000033389	Rho GTPase activating protein 44 [Source:MGI Symbol;Acc:MGI:2144423]	Arhgap44	protein_coding	-0.499656	0.0221904	1.65383	0.27569	120	253	255	339	436	396	288.253	0.218468	-2.28709
ENSMUSG00000036845	lin-37 homolog (C. elegans) [Source:MGI Symbol;Acc:MGI:1922910]	Lin37	protein_coding	0.327055	0.0221881	1.65388	0.27569	1128	1523	1198	997	1414	988	1189.68	0.142998	2.28713
ENSMUSG00000028995	family with sequence similarity 126, member A [Source:MGI Symbol;Acc:MGI:2149839]	Fam126a	protein_coding	-0.387243	0.0224164	1.64943	0.278287	364	453	462	526	781	699	530.74	0.169603	-2.28324
ENSMUSG00000027787	NMD3 ribosome export adaptor [Source:MGI Symbol;Acc:MGI:2140103]	Nmd3	protein_coding	-0.228687	0.0224608	1.64857	0.278626	2339	3215	2588	3661	3707	3477	3089.15	0.100192	-2.28248
ENSMUSG00000041309	NK6 homeobox 2 [Source:MGI Symbol;Acc:MGI:1352738]	Nkx6-2	protein_coding	-0.53752	0.0224878	1.64805	0.278692	43	36	50	115	97	91	69.8004	0.235545	-2.28203
ENSMUSG00000079003	sterile alpha motif domain containing 1 [Source:MGI Symbol;Acc:MGI:2142433]	Samd1	protein_coding	-0.522304	0.0225001	1.64782	0.278692	108	102	87	200	273	140	146.026	0.228898	-2.28182
ENSMUSG00000114073	predicted gene, 30302 [Source:MGI Symbol;Acc:MGI:5589461]	Gm30302	protein_coding	-0.48848	0.0225753	1.64637	0.279412	204	419	454	544	795	627	487.267	0.214194	-2.28055
ENSMUSG00000022770	discs large MAGUK scaffold protein 1 [Source:MGI Symbol;Acc:MGI:107231]	Dlg1	protein_coding	0.409267	0.0226427	1.64507	0.280035	778	619	755	543	584	627	651.953	0.179549	2.27941
ENSMUSG00000032175	tyrosine kinase 2 [Source:MGI Symbol;Acc:MGI:1929470]	Tyk2	protein_coding	-0.508754	0.0227303	1.64339	0.280907	325	179	204	432	445	525	343.145	0.22334	-2.27794
ENSMUSG00000029569	transmembrane protein 168 [Source:MGI Symbol;Acc:MGI:1921794]	Tmem168	protein_coding	-0.280014	0.0227749	1.64254	0.281246	954	1308	1112	1368	1637	1705	1311.61	0.122965	-2.27719
ENSMUSG00000063953	S-adenosylmethionine decarboxylase 2 [Source:MGI Symbol;Acc:MGI:1333111]	Amd2	protein_coding	0.358537	0.0230204	1.63789	0.284063	18	18	18	0	1	3	10.1089	0.157731	2.2731
ENSMUSG00000027804	peptidylprolyl isomerase D (cyclophilin D) [Source:MGI Symbol;Acc:MGI:1914988]	Ppid	protein_coding	0.352184	0.0231146	1.63611	0.28501	606	793	624	550	694	494	618.875	0.155042	2.27154
ENSMUSG00000037286	stromal antigen 1 [Source:MGI Symbol;Acc:MGI:1098658]	Stag1	protein_coding	-0.449474	0.0231836	1.63482	0.285646	367	290	292	467	525	641	419.645	0.197972	-2.2704
ENSMUSG00000053774	UBX domain protein 7 [Source:MGI Symbol;Acc:MGI:2146388]	Ubxn7	protein_coding	-0.392532	0.0232059	1.6344	0.285706	673	1233	1180	1560	1666	1570	1273.36	0.17292	-2.27003
ENSMUSG00000029093	sortilin-related VPS10 domain containing receptor 2 [Source:MGI Symbol;Acc:MGI:1932289]	Sorcs2	protein_coding	-0.352998	0.0232308	1.63394	0.285798	752	834	568	1056	1173	1004	873.977	0.155532	-2.26962
ENSMUSG00000062760	shisa like 1 [Source:MGI Symbol;Acc:MGI:1919551]	Shisal1	protein_coding	-0.533304	0.0232844	1.63294	0.286242	55	357	167	391	550	472	312.85	0.235067	-2.26874
ENSMUSG00000100432	predicted gene 7539 [Source:MGI Symbol;Acc:MGI:3647619]	Gm7539	processed_pseudogene	0.355219	0.0233555	1.63161	0.286687	22	13	24	3	0	1	11.2165	0.156652	2.26757
ENSMUSG00000020116	partner of NOB1 homolog [Source:MGI Symbol;Acc:MGI:1913499]	Pno1	protein_coding	-0.310355	0.0233402	1.6319	0.286687	1012	1599	1307	1856	2059	1680	1540.19	0.136852	-2.26782
ENSMUSG00000003199	MPN domain containing [Source:MGI Symbol;Acc:MGI:1915297]	Mpnd	protein_coding	-0.4105	0.023416	1.63049	0.287214	270	339	308	423	632	427	386.618	0.18111	-2.26658
ENSMUSG00000059791	nurim (nuclear envelope membrane protein) [Source:MGI Symbol;Acc:MGI:2146855]	Nrm	protein_coding	0.508885	0.0234577	1.62972	0.28751	88	77	83	32	58	12	59.2664	0.224584	2.2659
ENSMUSG00000082252	predicted gene 11204 [Source:MGI Symbol;Acc:MGI:3650271]	Gm11204	processed_pseudogene	0.493294	0.0235552	1.62791	0.288219	37	31	33	9	17	11	23.4931	0.217857	2.26431
ENSMUSG00000080902	tyrosine 3-monooxygenase/tryptophan 5-monooxygenase activation protein theta, pseudogene 3 [Source:MGI Symbol;Acc:MGI:3650241]	Ywhaq-ps3	transcribed_processed_pseudogene	0.330696	0.0235507	1.628	0.288219	21	17	11	0	0	1	8.80326	0.146043	2.26438
ENSMUSG00000028629	exonuclease 5 [Source:MGI Symbol;Acc:MGI:1920422]	Exo5	protein_coding	-0.310684	0.0235683	1.62767	0.288219	982	1156	873	1530	1452	1334	1192.38	0.137222	-2.2641
ENSMUSG00000029403	cyclin-dependent kinase-like 2 (CDC2-related kinase) [Source:MGI Symbol;Acc:MGI:1858227]	Cdkl2	protein_coding	0.485079	0.0236175	1.62677	0.288533	589	459	317	341	321	309	391.348	0.214324	2.2633
ENSMUSG00000028741	mRNA turnover 4, ribosome maturation factor [Source:MGI Symbol;Acc:MGI:1917152]	Mrto4	protein_coding	0.357255	0.0236292	1.62655	0.288533	496	620	447	444	469	417	477.195	0.15786	2.26311
ENSMUSG00000004364	cullin 3 [Source:MGI Symbol;Acc:MGI:1347360]	Cul3	protein_coding	-0.352398	0.0236865	1.6255	0.288952	807	1209	927	1215	1878	1324	1185	0.155778	-2.26218
ENSMUSG00000031851	nucleoside-triphosphatase, cancer-related [Source:MGI Symbol;Acc:MGI:1913816]	Ntpcr	protein_coding	-0.351528	0.0237164	1.62495	0.288952	529	543	617	836	933	781	689.745	0.155427	-2.26169
ENSMUSG00000035198	tubulin, gamma 1 [Source:MGI Symbol;Acc:MGI:101834]	Tubg1	protein_coding	0.317103	0.0237058	1.62515	0.288952	910	1003	761	747	818	815	834.378	0.140195	2.26186
ENSMUSG00000039840	ectopic P-granules autophagy protein 5 homolog (C. elegans) [Source:MGI Symbol;Acc:MGI:1918673]	Epg5	protein_coding	-0.498305	0.0237349	1.62461	0.288962	165	220	301	343	598	374	320.528	0.220353	-2.26139
ENSMUSG00000034342	Casitas B-lineage lymphoma [Source:MGI Symbol;Acc:MGI:88279]	Cbl	protein_coding	0.448996	0.0237534	1.62427	0.288973	473	432	636	340	410	433	454.654	0.198574	2.26109
ENSMUSG00000064351	mitochondrially encoded cytochrome c oxidase I [Source:MGI Symbol;Acc:MGI:102504]	mt-Co1	protein_coding	0.454681	0.0238172	1.62311	0.289136	2536	1467	2068	1480	1368	1795	1804.91	0.201181	2.26007
ENSMUSG00000063816	predicted gene 4987 [Source:MGI Symbol;Acc:MGI:3647751]	Gm4987	processed_pseudogene	0.329338	0.0238197	1.62306	0.289136	17	13	17	0	1	0	8.49157	0.145723	2.26003
ENSMUSG00000034708	granulin [Source:MGI Symbol;Acc:MGI:95832]	Grn	protein_coding	0.278031	0.0238011	1.6234	0.289136	1537	2392	1745	1616	1840	1730	1780.23	0.123005	2.26032
ENSMUSG00000020590	sorting nexin 13 [Source:MGI Symbol;Acc:MGI:2661416]	Snx13	protein_coding	-0.272607	0.0239633	1.62045	0.290577	1189	1655	1238	1696	2202	1768	1578.13	0.120745	-2.25772
ENSMUSG00000074682	zinc finger, CCHC domain containing 3 [Source:MGI Symbol;Acc:MGI:1915167]	Zcchc3	protein_coding	0.256713	0.0239739	1.62026	0.290577	1912	2463	1869	1930	2168	1748	1986.7	0.113713	2.25755
ENSMUSG00000016018	Mtr4 exosome RNA helicase [Source:MGI Symbol;Acc:MGI:1919448]	Mtrex	protein_coding	-0.360278	0.0240806	1.61833	0.291655	1151	1139	1548	1802	2133	1939	1580.56	0.159709	-2.25584
ENSMUSG00000060467	predicted gene 10080 [Source:MGI Symbol;Acc:MGI:3710529]	Gm10080	processed_pseudogene	0.52383	0.024122	1.61759	0.29194	42	63	56	28	19	27	39.4919	0.232279	2.25518
ENSMUSG00000010796	ankyrin repeat, SAM and basic leucine zipper domain containing 1 [Source:MGI Symbol;Acc:MGI:1921318]	Asz1	protein_coding	-0.276511	0.024169	1.61674	0.292293	1701	1697	1489	2135	2309	2407	1914.37	0.122652	-2.25443
ENSMUSG00000025245	leucine zipper transcription factor-like 1 [Source:MGI Symbol;Acc:MGI:1934860]	Lztfl1	protein_coding	0.432436	0.0242841	1.61468	0.293322	341	515	574	325	410	376	419.893	0.191971	2.2526
ENSMUSG00000003299	mitochondrial ribosomal protein L4 [Source:MGI Symbol;Acc:MGI:2137210]	Mrpl4	protein_coding	0.28763	0.0243077	1.61426	0.293322	1220	1416	1140	1200	1147	1094	1191.45	0.127709	2.25223
ENSMUSG00000017686	ras homolog family member T1 [Source:MGI Symbol;Acc:MGI:1926078]	Rhot1	protein_coding	-0.245594	0.0242929	1.61452	0.293322	5723	8683	7272	9226	9725	10283	8269.73	0.109033	-2.25246
ENSMUSG00000053178	mitochondrial transcription termination factor 1b [Source:MGI Symbol;Acc:MGI:3704243]	Mterf1b	protein_coding	0.523552	0.0245162	1.61055	0.295505	84	54	74	34	46	23	53.5985	0.232799	2.24894
ENSMUSG00000038115	anoctamin 2 [Source:MGI Symbol;Acc:MGI:2387214]	Ano2	protein_coding	-0.412035	0.0245247	1.6104	0.295505	235	255	194	319	410	378	289.636	0.183224	-2.24881
ENSMUSG00000097353	Riken cDNA A430046D13 gene [Source:MGI Symbol;Acc:MGI:3609643]	A430046D13Rik	lincRNA	-0.511999	0.0246207	1.6087	0.296443	324	233	204	670	360	490	372.792	0.227828	-2.2473
ENSMUSG00000042043	tubulin cofactor A [Source:MGI Symbol;Acc:MGI:107549]	Tbca	protein_coding	0.487792	0.0246519	1.60815	0.296601	553	601	491	484	248	400	465.25	0.217104	2.24681
ENSMUSG00000067942	zinc finger protein 160 [Source:MGI Symbol;Acc:MGI:108187]	Zfp160	protein_coding	-0.361817	0.0247018	1.60727	0.296983	766	828	975	1167	1251	1497	1055.37	0.161092	-2.24603
ENSMUSG00000024232	BMP and activin membrane-bound inhibitor [Source:MGI Symbol;Acc:MGI:1915260]	Bambi	protein_coding	-0.51888	0.0247664	1.60614	0.297324	29	16	29	56	77	82	46.2563	0.231124	-2.24503
ENSMUSG00000004455	protein phosphatase 1 catalytic subunit gamma [Source:MGI Symbol;Acc:MGI:104872]	Ppp1cc	protein_coding	0.518219	0.0247483	1.60645	0.297324	58	74	36	29	22	24	40.7661	0.230801	2.24531
ENSMUSG00000027206	COP9 signalosome subunit 2 [Source:MGI Symbol;Acc:MGI:1330276]	Cops2	protein_coding	-0.248853	0.0248107	1.60536	0.297637	3103	4623	3823	5282	5221	5103	4413.99	0.11088	-2.24434
ENSMUSG00000038292	coiled-coil domain containing 155 [Source:MGI Symbol;Acc:MGI:2687329]	Ccdc155	protein_coding	-0.212219	0.0248388	1.60487	0.297757	1573	1951	1735	2068	2547	2355	1989.24	0.0945761	-2.2439
ENSMUSG00000106133	predicted gene 3724 [Source:MGI Symbol;Acc:MGI:3804937]	Gm3724	processed_pseudogene	0.52347	0.0249118	1.60359	0.298142	143	107	97	71	65	74	93.9987	0.233403	2.24277
ENSMUSG00000031666	RB transcriptional corepressor like 2 [Source:MGI Symbol;Acc:MGI:105085]	Rbl2	protein_coding	-0.51157	0.0249255	1.60336	0.298142	266	276	161	280	700	452	339.589	0.228119	-2.24256
ENSMUSG00000019857	anti-silencing function 1A histone chaperone [Source:MGI Symbol;Acc:MGI:1913653]	Asf1a	protein_coding	-0.246886	0.0249221	1.60342	0.298142	3542	4372	3925	5753	5452	4851	4548.38	0.110089	-2.24261
ENSMUSG00000028132	transmembrane protein 56 [Source:MGI Symbol;Acc:MGI:1923195]	Tmem56	protein_coding	0.52267	0.0249815	1.60238	0.298376	97	89	169	41	96	39	89.5547	0.233159	2.24169
ENSMUSG00000011589	fibronectin type 3 and SPRY domain-containing protein [Source:MGI Symbol;Acc:MGI:1934858]	Fsd1	protein_coding	0.320745	0.0249645	1.60268	0.298376	1462	2046	1890	1567	1430	1749	1674.23	0.143065	2.24195
ENSMUSG00000029722	ArfGAP with FG repeats 2 [Source:MGI Symbol;Acc:MGI:2443267]	Agfg2	protein_coding	-0.430004	0.0250233	1.60166	0.298658	316	424	357	498	836	494	469.532	0.191877	-2.24104
ENSMUSG00000026123	pleckstrin homology domain containing, family B (evectins) member 2 [Source:MGI Symbol;Acc:MGI:2385825]	Plekhb2	protein_coding	-0.453035	0.025084	1.6006	0.299164	327	316	198	462	549	442	370.786	0.202238	-2.24011
ENSMUSG00000094992	F-box and WD-40 domain protein 25 [Source:MGI Symbol;Acc:MGI:3588266]	Fbxw25	protein_coding	0.327561	0.025122	1.59995	0.2994	1038	1322	1092	1047	891	1076	1068.72	0.146264	2.23952
ENSMUSG00000078949	R3H domain containing-like [Source:MGI Symbol;Acc:MGI:3650937]	R3hdml	protein_coding	-0.455493	0.0252169	1.59831	0.300094	270	444	214	530	568	479	402.412	0.203521	-2.23806
ENSMUSG00000027583	zinc finger and BTB domain containing 46 [Source:MGI Symbol;Acc:MGI:1919397]	Zbtb46	protein_coding	-0.297209	0.0252127	1.59838	0.300094	2224	2061	2157	2766	3093	3383	2559.51	0.132793	-2.23813
ENSMUSG00000078796	zinc finger protein 541 [Source:MGI Symbol;Acc:MGI:3647699]	Zfp541	protein_coding	-0.341259	0.0252877	1.59709	0.300718	1250	1441	936	1658	1756	1953	1460.11	0.152553	-2.23698
ENSMUSG00000062075	lamin B2 [Source:MGI Symbol;Acc:MGI:96796]	Lmnb2	protein_coding	-0.469225	0.0253366	1.59625	0.301052	242	217	222	301	561	372	307.919	0.209828	-2.23623
ENSMUSG00000046027	StAR-related lipid transfer (START) domain containing 5 [Source:MGI Symbol;Acc:MGI:2156765]	Stard5	protein_coding	-0.384558	0.0253709	1.59566	0.301052	692	1201	827	1324	1743	1136	1113.03	0.172007	-2.23571
ENSMUSG00000110000	predicted gene, 33501 [Source:MGI Symbol;Acc:MGI:5592660]	Gm33501	lincRNA	-0.33415	0.0253581	1.59588	0.301052	0	2	0	21	26	15	9.82124	0.149447	-2.2359
ENSMUSG00000034190	charged multivesicular body protein 7 [Source:MGI Symbol;Acc:MGI:1913922]	Chmp7	protein_coding	-0.284003	0.0254184	1.59485	0.301398	1827	1975	1598	2621	2410	2544	2117.02	0.127072	-2.23498
ENSMUSG00000033685	uncoupling protein 2 (mitochondrial, proton carrier) [Source:MGI Symbol;Acc:MGI:109354]	Ucp2	protein_coding	0.450558	0.025495	1.59355	0.301941	59	47	45	19	3	20	33.3841	0.201699	2.23382
ENSMUSG00000000876	peroxisomal membrane protein 4 [Source:MGI Symbol;Acc:MGI:1891701]	Pxmp4	protein_coding	0.412252	0.0255195	1.59313	0.301941	286	397	391	299	289	265	318.982	0.184581	2.23345
ENSMUSG00000063350	olfactory receptor 874 [Source:MGI Symbol;Acc:MGI:3030708]	Olfr874	protein_coding	-0.315569	0.0255047	1.59338	0.301941	0	0	0	13	33	22	10.2885	0.141278	-2.23367
ENSMUSG00000043943	N-acetylated alpha-linked acidic dipeptidase 2 [Source:MGI Symbol;Acc:MGI:1919810]	Naalad2	protein_coding	-0.376392	0.0255807	1.59209	0.302446	627	1184	801	1338	1283	1336	1060.54	0.168595	-2.23252
ENSMUSG00000031343	gamma-aminobutyric acid (GABA) A receptor, subunit alpha 3 [Source:MGI Symbol;Acc:MGI:95615]	Gabra3	protein_coding	0.443538	0.0256051	1.59167	0.302516	380	535	524	334	301	452	419.012	0.198704	2.23215
ENSMUSG00000096157	predicted gene 5472 [Source:MGI Symbol;Acc:MGI:3648309]	Gm5472	processed_pseudogene	0.464053	0.0256414	1.59106	0.302728	192	304	205	177	154	175	199.485	0.207946	2.2316
ENSMUSG00000063171	ribosomal protein S4-like [Source:MGI Symbol;Acc:MGI:1913434]	Rps4l	transcribed_processed_pseudogene	-0.301487	0.0257573	1.5891	0.303877	640	793	603	886	1121	903	801.518	0.135205	-2.22985
ENSMUSG00000025371	charged multivesicular body protein 6 [Source:MGI Symbol;Acc:MGI:3583942]	Chmp6	protein_coding	-0.324661	0.0258168	1.5881	0.30414	0	1	0	15	29	13	8.80108	0.145656	-2.22896
ENSMUSG00000021830	thioredoxin domain containing 16 [Source:MGI Symbol;Acc:MGI:1917811]	Txndc16	protein_coding	-0.304927	0.0258101	1.58821	0.30414	1381	2233	1790	2666	2621	2369	2117.52	0.136796	-2.22906
ENSMUSG00000024414	mitochondrial ribosomal protein L27 [Source:MGI Symbol;Acc:MGI:2137224]	Mrpl27	protein_coding	0.508914	0.0259096	1.58654	0.305015	121	121	131	91	84	66	102.914	0.228462	2.22756
ENSMUSG00000046000	N(alpha)-acetyltransferase 11, NatA catalytic subunit [Source:MGI Symbol;Acc:MGI:2141314]	Naa11	protein_coding	-0.297507	0.0259423	1.58599	0.30518	2555	3003	2058	3293	4308	3260	2993.54	0.133587	-2.22707
ENSMUSG00000060212	pecanex homolog 2 [Source:MGI Symbol;Acc:MGI:2445010]	Pcnx2	protein_coding	-0.524298	0.0260561	1.58409	0.305505	25	69	42	107	97	117	72.7899	0.2356	-2.22537
ENSMUSG00000016200	synaptotagmin XIV [Source:MGI Symbol;Acc:MGI:2444490]	Syt14	protein_coding	-0.417204	0.0260631	1.58397	0.305505	9	11	1	47	26	49	22.667	0.187484	-2.22527
ENSMUSG00000058897	collagen, type XXV, alpha 1 [Source:MGI Symbol;Acc:MGI:1924268]	Col25a1	protein_coding	-0.416499	0.0260587	1.58405	0.305505	498	643	470	715	1216	705	681.806	0.187162	-2.22534
ENSMUSG00000015120	ubiquitin-conjugating enzyme E2I [Source:MGI Symbol;Acc:MGI:107365]	Ube2i	protein_coding	0.336392	0.0260563	1.58409	0.305505	638	985	742	693	728	622	724.514	0.151162	2.22537
ENSMUSG00000033751	growth arrest and DNA-damage-inducible, gamma interacting protein 1 [Source:MGI Symbol;Acc:MGI:1914947]	Gadd45gip1	protein_coding	-0.261549	0.0260194	1.5847	0.305505	1793	2393	1889	2725	3217	2414	2341.24	0.117501	-2.22592
ENSMUSG00000113936	predicted gene 8784 [Source:MGI Symbol;Acc:MGI:3646031]	Gm8784	processed_pseudogene	0.507766	0.0262658	1.58061	0.306164	34	76	49	16	31	22	37.7047	0.228491	2.22226
ENSMUSG00000061273	membrane magnesium transporter 1 [Source:MGI Symbol;Acc:MGI:2384305]	Mmgt1	protein_coding	-0.491664	0.0262404	1.58103	0.306164	215	440	584	696	857	775	573.006	0.221208	-2.22263
ENSMUSG00000059108	interferon induced transmembrane protein 6 [Source:MGI Symbol;Acc:MGI:2686976]	Ifitm6	protein_coding	-0.349639	0.0261437	1.58263	0.306164	1363	2362	1663	2862	2395	2666	2157.01	0.157207	-2.22407
ENSMUSG00000014504	signal recognition particle 19 [Source:MGI Symbol;Acc:MGI:1913634]	Srp19	protein_coding	-0.302086	0.0262111	1.58152	0.306164	482	633	479	711	813	747	626.803	0.135887	-2.22307
ENSMUSG00000020171	YEATS domain containing 4 [Source:MGI Symbol;Acc:MGI:1927224]	Yeats4	protein_coding	-0.26665	0.0261783	1.58206	0.306164	1429	1941	1495	2223	2523	1964	1878.06	0.11992	-2.22356
ENSMUSG00000034210	EF-hand calcium binding domain 14 [Source:MGI Symbol;Acc:MGI:2442397]	Efcab14	protein_coding	-0.247158	0.0262688	1.58056	0.306164	1448	1958	1771	2106	2696	2252	1984.67	0.111221	-2.22221
ENSMUSG00000030556	leucine rich repeat containing 28 [Source:MGI Symbol;Acc:MGI:1915689]	Lrrc28	protein_coding	-0.19383	0.0262446	1.58096	0.306164	3267	4539	3779	4785	5340	4926	4332.25	0.0872098	-2.22257
ENSMUSG00000071089	tripartite motif-containing 75 [Source:MGI Symbol;Acc:MGI:2685640]	Trim75	protein_coding	-0.179868	0.0261642	1.58229	0.306164	9679	13161	11692	14073	15722	14648	12857.4	0.0808846	-2.22377
ENSMUSG00000064339	mitochondrially encoded 16S rRNA [Source:MGI Symbol;Acc:MGI:102492]	mt-Rnr2	Mt_rRNA	-0.463448	0.0264073	1.57828	0.307123	3211	2608	2726	6871	3165	4920	3858.66	0.208745	-2.22017
ENSMUSG00000086022	RAD51 associated protein 2 [Source:MGI Symbol;Acc:MGI:3644580]	Rad51ap2	protein_coding	-0.416781	0.0263927	1.57852	0.307123	261	405	319	579	459	541	415.636	0.187707	-2.22038
ENSMUSG00000025059	glycerol kinase [Source:MGI Symbol;Acc:MGI:106594]	Gk	protein_coding	0.181634	0.0263899	1.57856	0.307123	3263	3796	3401	3155	3726	3569	3437.17	0.0818016	2.22042
ENSMUSG00000013419	zinc finger protein 651 [Source:MGI Symbol;Acc:MGI:2670992]	Zfp651	protein_coding	0.374397	0.0264902	1.57691	0.307869	33	8	39	4	1	6	16.3345	0.168727	2.21895
ENSMUSG00000028917	pleckstrin homology domain containing, family M (with RUN domain) member 2 [Source:MGI Symbol;Acc:MGI:1916832]	Plekhm2	protein_coding	-0.41006	0.0265183	1.57645	0.307977	1	16	7	22	69	54	25.8579	0.184834	-2.21854
ENSMUSG00000021302	geranylgeranyl diphosphate synthase 1 [Source:MGI Symbol;Acc:MGI:1341724]	Ggps1	protein_coding	-0.510148	0.0265958	1.57519	0.308658	95	148	65	178	198	240	147.878	0.230066	-2.2174
ENSMUSG00000070000	FCH domain only 1 [Source:MGI Symbol;Acc:MGI:1921265]	Fcho1	protein_coding	-0.259762	0.0267787	1.57221	0.31056	1310	1476	1501	1717	2220	2002	1663.26	0.117288	-2.21473
ENSMUSG00000018733	peroxisomal biogenesis factor 12 [Source:MGI Symbol;Acc:MGI:2144177]	Pex12	protein_coding	0.337692	0.0270708	1.5675	0.313726	1389	1556	1756	1368	1231	1492	1458.48	0.152767	2.2105
ENSMUSG00000042506	ubiquitin specific peptidase 22 [Source:MGI Symbol;Acc:MGI:2144157]	Usp22	protein_coding	-0.513749	0.0271743	1.56584	0.314481	49	302	272	336	847	475	356.242	0.23257	-2.20901
ENSMUSG00000050621	ribosomal protein S27, retrogene [Source:MGI Symbol;Acc:MGI:3704345]	Rps27rt	protein_coding	0.334375	0.0271634	1.56602	0.314481	29	10	14	2	0	1	10.1084	0.151358	2.20916
ENSMUSG00000117295	actin related protein 2/3 complex, subunit 2 (Arpc2) pseudogene	AC154544.1	processed_pseudogene	0.387115	0.0272019	1.5654	0.314578	432	461	451	305	461	352	406.866	0.175276	2.20861
ENSMUSG00000035834	polymerase (RNA) III (DNA directed) polypeptide G [Source:MGI Symbol;Acc:MGI:1914736]	Polr3g	protein_coding	-0.517764	0.0272466	1.56469	0.314873	19	45	37	98	78	76	56.4262	0.234498	-2.20797
ENSMUSG00000027951	adenosine deaminase, RNA-specific [Source:MGI Symbol;Acc:MGI:1889575]	Adar	protein_coding	-0.332721	0.0273414	1.56318	0.315746	1979	1721	1629	2157	2913	2888	2161.51	0.150784	-2.20661
ENSMUSG00000030815	phosphorylase kinase, gamma 2 (testis) [Source:MGI Symbol;Acc:MGI:1916211]	Phkg2	protein_coding	-0.477267	0.0274264	1.56183	0.316504	94	158	158	260	262	220	185.633	0.216409	-2.20539
ENSMUSG00000025894	aminoadipate-semialdehyde dehydrogenase-phosphopantetheinyl transferase [Source:MGI Symbol;Acc:MGI:1914868]	Aasdhppt	protein_coding	-0.513779	0.0274612	1.56128	0.316638	31	217	156	314	384	339	227.319	0.233017	-2.2049
ENSMUSG00000062846	predicted gene 14176 [Source:MGI Symbol;Acc:MGI:3650021]	Gm14176	processed_pseudogene	0.359835	0.0274766	1.56104	0.316638	439	640	472	452	453	401	470.504	0.163214	2.20468
ENSMUSG00000083367	predicted gene 8806 [Source:MGI Symbol;Acc:MGI:3643511]	Gm8806	processed_pseudogene	0.272857	0.0274992	1.56068	0.316675	1246	1493	1343	1098	1516	1183	1295.26	0.123781	2.20436
ENSMUSG00000105833	predicted gene 4751 [Source:MGI Symbol;Acc:MGI:3644028]	Gm4751	processed_pseudogene	0.5196	0.0275232	1.5603	0.31673	77	94	71	51	32	48	62.6192	0.235751	2.20402
ENSMUSG00000030706	mitochondrial ribosomal protein L48 [Source:MGI Symbol;Acc:MGI:1289321]	Mrpl48	protein_coding	0.330907	0.0275686	1.55959	0.317029	1052	1508	1065	1140	988	1008	1114.15	0.150182	2.20337
ENSMUSG00000078684	RIKEN cDNA 5830417I10 gene [Source:MGI Symbol;Acc:MGI:1923272]	5830417I10Rik	unprocessed_pseudogene	0.370878	0.0276167	1.55883	0.317321	55	13	10	4	2	5	16.0462	0.168375	2.20269
ENSMUSG00000028243	UBX domain protein 2B [Source:MGI Symbol;Acc:MGI:1915303]	Ubxn2b	protein_coding	-0.353946	0.0276327	1.55858	0.317321	549	676	504	914	966	718	701.601	0.160705	-2.20246
ENSMUSG00000031730	dihydroorotate dehydrogenase [Source:MGI Symbol;Acc:MGI:1928378]	Dhodh	protein_coding	-0.390927	0.0276868	1.55773	0.317719	678	930	544	1015	1416	948	889.977	0.177557	-2.2017
ENSMUSG00000045532	complement component 1, q subcomponent-like 1 [Source:MGI Symbol;Acc:MGI:1344400]	C1ql1	protein_coding	0.51727	0.0277783	1.5563	0.317879	108	99	75	68	35	42	72.324	0.23508	2.2004
ENSMUSG00000113017	predicted gene, 46401 [Source:MGI Symbol;Acc:MGI:5826038]	Gm46401	lincRNA	-0.501546	0.027755	1.55666	0.317879	157	352	218	546	311	531	341.022	0.2279	-2.20073
ENSMUSG00000023791	phosphatidylinositol glycan anchor biosynthesis, class X [Source:MGI Symbol;Acc:MGI:1919334]	Pigx	protein_coding	-0.479979	0.0277361	1.55695	0.317879	184	485	398	674	656	590	479.231	0.218073	-2.201
ENSMUSG00000032841	proline rich 5 like [Source:MGI Symbol;Acc:MGI:1919696]	Prr5l	protein_coding	-0.286983	0.0277729	1.55638	0.317879	2309	2831	2462	2904	4555	3340	2977.02	0.130418	-2.20048
ENSMUSG00000086932	predicted gene 22000 [Source:MGI Symbol;Acc:MGI:5440235]	Gm22000	processed_transcript	-0.418413	0.0278019	1.55593	0.317927	284	402	262	567	453	507	401.123	0.190182	-2.20007
ENSMUSG00000031902	nuclear factor of activated T cells, cytoplasmic, calcineurin dependent 3 [Source:MGI Symbol;Acc:MGI:103296]	Nfatc3	protein_coding	0.4969	0.0278944	1.55448	0.318222	40	109	164	56	46	29	74.6272	0.22599	2.19877
ENSMUSG00000061838	succinate-Coenzyme A ligase, GDP-forming, beta subunit [Source:MGI Symbol;Acc:MGI:1306824]	Suclg2	protein_coding	0.460671	0.0278965	1.55445	0.318222	297	356	345	262	182	281	287.397	0.209516	2.19874
ENSMUSG00000051154	COMM domain containing 3 [Source:MGI Symbol;Acc:MGI:88218]	Commd3	protein_coding	-0.293324	0.0279053	1.55431	0.318222	954	1185	1056	1608	1417	1482	1255.45	0.133413	-2.19861
ENSMUSG00000027496	aurora kinase A [Source:MGI Symbol;Acc:MGI:894678]	Aurka	protein_coding	-0.175562	0.0278485	1.5552	0.318222	7232	8763	7229	9123	11378	9438	8651.52	0.0798223	-2.19941
ENSMUSG00000061486	predicted pseudogene 5161 [Source:MGI Symbol;Acc:MGI:3648529]	Gm5161	processed_pseudogene	0.483391	0.0279637	1.5534	0.318445	39	31	30	11	15	13	23.6826	0.219943	2.19779
ENSMUSG00000052144	protein phosphatase 4, regulatory subunit 2 [Source:MGI Symbol;Acc:MGI:3027896]	Ppp4r2	protein_coding	0.436908	0.0279589	1.55348	0.318445	355	454	591	371	369	333	411.111	0.198788	2.19786
ENSMUSG00000055415	ATPase, class V, type 10B [Source:MGI Symbol;Acc:MGI:2442688]	Atp10b	protein_coding	-0.307273	0.0280256	1.55245	0.318727	621	691	742	953	1079	934	816.932	0.139865	-2.19693
ENSMUSG00000086851	RIKEN cDNA A430108G06 gene [Source:MGI Symbol;Acc:MGI:2442478]	A430108G06Rik	processed_transcript	-0.306904	0.0280274	1.55242	0.318727	0	0	0	22	30	13	9.93747	0.139698	-2.1969
ENSMUSG00000022558	maestro heat-like repeat family member 1 [Source:MGI Symbol;Acc:MGI:2442558]	Mroh1	protein_coding	-0.504912	0.0281137	1.55108	0.319486	122	125	216	215	375	362	227.218	0.229955	-2.1957
ENSMUSG00000083774	predicted pseudogene 7180 [Source:MGI Symbol;Acc:MGI:3648560]	Gm7180	processed_pseudogene	0.261621	0.028139	1.55069	0.319552	1732	2028	1696	1645	1978	1487	1738.62	0.119171	2.19534
ENSMUSG00000018417	myosin IB [Source:MGI Symbol;Acc:MGI:107752]	Myo1b	protein_coding	-0.288659	0.0282423	1.5491	0.320503	933	929	918	1308	1333	1303	1097.44	0.131573	-2.1939
ENSMUSG00000025083	actin filament associated protein 1-like 2 [Source:MGI Symbol;Acc:MGI:2147658]	Afap1l2	protein_coding	-0.189842	0.0283875	1.54687	0.321928	4558	5261	5207	6183	6837	6573	5649.75	0.0866113	-2.19189
ENSMUSG00000058351	small integral membrane protein 4 [Source:MGI Symbol;Acc:MGI:1913737]	Smim4	protein_coding	-0.513321	0.0284074	1.54657	0.321931	36	52	48	98	88	105	68.6899	0.234221	-2.19161
ENSMUSG00000110277	predicted gene 45871 [Source:MGI Symbol;Acc:MGI:5804986]	Gm45871	protein_coding	-0.422526	0.028579	1.54395	0.323651	1184	2098	1045	2601	1874	2456	1819.52	0.193001	-2.18925
ENSMUSG00000000037	Scm polycomb group protein like 2 [Source:MGI Symbol;Acc:MGI:1340042]	Scml2	protein_coding	-0.251362	0.0287252	1.54174	0.325083	1943	2039	1983	2672	2652	2849	2309.32	0.114922	-2.18724
ENSMUSG00000110156	predicted gene, 42067 [Source:MGI Symbol;Acc:MGI:5624952]	Gm42067	antisense	-0.4171	0.0287779	1.54094	0.325454	4	10	4	20	57	20	17.621	0.19076	-2.18652
ENSMUSG00000031483	ER lipid raft associated 2 [Source:MGI Symbol;Acc:MGI:2387215]	Erlin2	protein_coding	-0.502337	0.0288192	1.54032	0.325697	76	79	62	104	170	166	105.296	0.229803	-2.18595
ENSMUSG00000022197	PDZ domain containing 2 [Source:MGI Symbol;Acc:MGI:1922394]	Pdzd2	protein_coding	-0.206716	0.0289115	1.53893	0.326515	2027	2392	2110	2713	3250	2665	2467.46	0.0946202	-2.18469
ENSMUSG00000053646	plexin B1 [Source:MGI Symbol;Acc:MGI:2154238]	Plxnb1	protein_coding	-0.425623	0.0289595	1.53821	0.326832	180	244	188	258	381	375	261.705	0.194879	-2.18404
ENSMUSG00000042608	serine/threonine kinase 40 [Source:MGI Symbol;Acc:MGI:1921428]	Stk40	protein_coding	0.234836	0.0289817	1.53788	0.326857	1534	1851	1510	1376	1651	1652	1574.08	0.107539	2.18374
ENSMUSG00000082878	predicted gene 12583 [Source:MGI Symbol;Acc:MGI:3651485]	Gm12583	processed_pseudogene	0.502844	0.0291004	1.5361	0.327493	46	46	46	18	19	27	34.1511	0.230438	2.18212
ENSMUSG00000025950	isocitrate dehydrogenase 1 (NADP+), soluble [Source:MGI Symbol;Acc:MGI:96413]	Idh1	protein_coding	-0.33693	0.0290779	1.53644	0.327493	626	1021	725	1052	1381	1057	944.998	0.154383	-2.18243
ENSMUSG00000047419	cardiomyopathy associated 5 [Source:MGI Symbol;Acc:MGI:1923719]	Cmya5	protein_coding	-0.316134	0.0290892	1.53627	0.327493	3965	5378	3897	7103	5379	6451	5240.31	0.144864	-2.18228
ENSMUSG00000038828	transmembrane protein 214 [Source:MGI Symbol;Acc:MGI:1916046]	Tmem214	protein_coding	-0.250837	0.029118	1.53584	0.327493	1777	1865	1564	2144	2504	2496	2011.95	0.114963	-2.18189
ENSMUSG00000112863	predicted gene, 19181 [Source:MGI Symbol;Acc:MGI:5011366]	Gm19181	processed_pseudogene	0.464145	0.0292494	1.53388	0.328744	173	322	233	169	205	147	205.407	0.2129	2.18011
ENSMUSG00000038619	endosulfine alpha [Source:MGI Symbol;Acc:MGI:1891189]	Ensa	protein_coding	-0.375341	0.0292949	1.53321	0.32903	589	890	839	1017	1110	1436	952.318	0.172215	-2.1795
ENSMUSG00000035069	OMA1 zinc metallopeptidase [Source:MGI Symbol;Acc:MGI:1914263]	Oma1	protein_coding	-0.282777	0.0293286	1.53271	0.329183	926	1393	1102	1616	1670	1482	1328.54	0.129771	-2.17904
ENSMUSG00000035351	nucleoporin 37 [Source:MGI Symbol;Acc:MGI:1919964]	Nup37	protein_coding	-0.322159	0.0293629	1.5322	0.329342	1589	1980	1277	2487	2228	2292	1927.04	0.147876	-2.17858
ENSMUSG00000054676	RIKEN cDNA 1600014C10 gene [Source:MGI Symbol;Acc:MGI:1919494]	1600014C10Rik	protein_coding	-0.302089	0.0294454	1.53098	0.330042	0	0	0	9	36	27	10.8392	0.138734	-2.17747
ENSMUSG00000021057	A kinase (PRKA) anchor protein 5 [Source:MGI Symbol;Acc:MGI:2685104]	Akap5	protein_coding	0.372633	0.0296257	1.52833	0.331767	101	27	17	11	1	11	30.2055	0.171321	2.17506
ENSMUSG00000032640	chondroitin sulfate synthase 1 [Source:MGI Symbol;Acc:MGI:2681120]	Chsy1	protein_coding	-0.347886	0.0296398	1.52812	0.331767	2157	3006	3706	3964	5052	4331	3599.79	0.159957	-2.17487
ENSMUSG00000036986	promyelocytic leukemia [Source:MGI Symbol;Acc:MGI:104662]	Pml	protein_coding	-0.47636	0.0297324	1.52677	0.332215	199	240	143	294	503	281	265.394	0.219153	-2.17364
ENSMUSG00000056673	lysine (K)-specific demethylase 5D [Source:MGI Symbol;Acc:MGI:99780]	Kdm5d	protein_coding	0.343775	0.0297082	1.52712	0.332215	7	16	20	2	1	1	8.07938	0.158133	2.17396
ENSMUSG00000005804	biogenesis of lysosomal organelles complex-1, subunit 6, pallidin [Source:MGI Symbol;Acc:MGI:1927580]	Bloc1s6	protein_coding	-0.32333	0.0297447	1.52659	0.332215	0	4	0	20	57	18	14.8876	0.148762	-2.17347
ENSMUSG00000020689	integrin beta 3 [Source:MGI Symbol;Acc:MGI:96612]	Itgb3	protein_coding	0.319142	0.0297609	1.52635	0.332215	1358	1486	1334	957	1356	1413	1303.48	0.14685	2.17326
ENSMUSG00000078509	PRAME family member 17 [Source:MGI Symbol;Acc:MGI:3650199]	Pramef17	protein_coding	0.511787	0.0299302	1.52389	0.332519	104	89	76	42	40	67	70.5148	0.235737	2.17101
ENSMUSG00000054277	ADP-ribosylation factor GTPase activating protein 3 [Source:MGI Symbol;Acc:MGI:1913501]	Arfgap3	protein_coding	0.473204	0.0299054	1.52425	0.332519	378	497	794	413	436	335	475.792	0.217932	2.17134
ENSMUSG00000020053	insulin-like growth factor 1 [Source:MGI Symbol;Acc:MGI:96432]	Igf1	protein_coding	0.423392	0.0299177	1.52407	0.332519	69	54	16	5	23	10	30.1541	0.195006	2.17118
ENSMUSG00000025384	Fanconi anemia core complex associated protein 100 [Source:MGI Symbol;Acc:MGI:1919135]	Faap100	protein_coding	-0.413333	0.0298428	1.52516	0.332519	368	574	500	541	928	881	609.087	0.190286	-2.17217
ENSMUSG00000108937	predicted gene, 18908 [Source:MGI Symbol;Acc:MGI:5011093]	Gm18908	processed_pseudogene	0.376016	0.0298139	1.52558	0.332519	293	364	332	267	269	285	299.465	0.173075	2.17255
ENSMUSG00000035963	outer dense fiber of sperm tails 3-like 2 [Source:MGI Symbol;Acc:MGI:2686003]	Odf3l2	protein_coding	0.373813	0.0298735	1.52471	0.332519	42	45	71	8	0	17	31.8372	0.172124	2.17176
ENSMUSG00000058388	putative homeodomain transcription factor 1 [Source:MGI Symbol;Acc:MGI:1332671]	Phtf1	protein_coding	-0.356036	0.0298666	1.52481	0.332519	811	869	1107	1289	1686	1288	1144.3	0.163932	-2.17185
ENSMUSG00000035298	kelch-like 35 [Source:MGI Symbol;Acc:MGI:1919434]	Klhl35	protein_coding	-0.376965	0.02999	1.52302	0.332958	0	6	9	44	37	33	20.2236	0.173699	-2.17022
ENSMUSG00000040586	OFD1, centriole and centriolar satellite protein [Source:MGI Symbol;Acc:MGI:1350328]	Ofd1	protein_coding	-0.285842	0.0300242	1.52253	0.333112	823	1174	1007	1272	1658	1301	1171.26	0.131738	-2.16977
ENSMUSG00000018727	cleavage and polyadenylation specific factor 4-like [Source:MGI Symbol;Acc:MGI:1277182]	Cpsf4l	protein_coding	-0.270425	0.0300456	1.52222	0.333124	13045	15091	12356	20866	16882	18175	15749.4	0.124649	-2.16949
ENSMUSG00000003808	phenylalanyl-tRNA synthetase, alpha subunit [Source:MGI Symbol;Acc:MGI:1913840]	Farsa	protein_coding	-0.278456	0.0300823	1.52169	0.333305	1109	1779	1390	1880	2100	1958	1654.78	0.12838	-2.16901
ENSMUSG00000062908	acyl-Coenzyme A dehydrogenase, medium chain [Source:MGI Symbol;Acc:MGI:87867]	Acadm	protein_coding	0.376441	0.0302042	1.51993	0.33443	426	596	439	359	502	353	439.511	0.173683	2.1674
ENSMUSG00000082169	predicted gene 12369 [Source:MGI Symbol;Acc:MGI:3652093]	Gm12369	processed_pseudogene	0.46082	0.0302705	1.51898	0.334937	32	40	22	7	13	13	21.3591	0.212699	2.16653
ENSMUSG00000022706	mitochondrial ribosomal protein L40 [Source:MGI Symbol;Acc:MGI:1332635]	Mrpl40	protein_coding	-0.26089	0.0304054	1.51705	0.336203	879	1085	910	1345	1304	1298	1111.16	0.120516	-2.16477
ENSMUSG00000025917	COP9 signalosome subunit 5 [Source:MGI Symbol;Acc:MGI:1349415]	Cops5	protein_coding	-0.360482	0.0305131	1.51551	0.337167	1222	2392	1628	2796	2496	2515	2108.7	0.16663	-2.16337
ENSMUSG00000023284	zinc finger protein 605 [Source:MGI Symbol;Acc:MGI:2444933]	Zfp605	protein_coding	0.43394	0.0305408	1.51512	0.337246	362	456	271	234	275	320	316.806	0.200619	2.163
ENSMUSG00000025937	lactamase, beta 2 [Source:MGI Symbol;Acc:MGI:2442551]	Lactb2	protein_coding	-0.354059	0.0305778	1.51459	0.337426	491	817	566	973	984	836	754.347	0.163725	-2.16252
ENSMUSG00000109355	predicted pseudogene 4880 [Source:MGI Symbol;Acc:MGI:3648786]	Gm4880	processed_pseudogene	0.482272	0.0307417	1.51227	0.338846	165	149	133	83	110	116	126.217	0.223233	2.1604
ENSMUSG00000102493	predicted gene 8010 [Source:MGI Symbol;Acc:MGI:3648648]	Gm8010	unprocessed_pseudogene	0.450721	0.0307543	1.51209	0.338846	272	265	237	181	247	152	224.896	0.208644	2.16024
ENSMUSG00000060445	synaptonemal complex protein 2 [Source:MGI Symbol;Acc:MGI:1933281]	Sycp2	protein_coding	-0.408272	0.0307685	1.51189	0.338846	666	1190	1021	1514	1222	1838	1206.8	0.18901	-2.16005
ENSMUSG00000021906	oxidoreductase NAD-binding domain containing 1 [Source:MGI Symbol;Acc:MGI:1916953]	Oxnad1	protein_coding	-0.327822	0.0308126	1.51127	0.339104	463	709	543	729	975	805	681.851	0.151806	-2.15948
ENSMUSG00000022022	mitochondrial translational release factor 1 [Source:MGI Symbol;Acc:MGI:2384815]	Mtrf1	protein_coding	-0.446345	0.0308878	1.51021	0.339475	336	578	267	704	739	556	510.565	0.206783	-2.15852
ENSMUSG00000028563	TM2 domain containing 1 [Source:MGI Symbol;Acc:MGI:2137022]	Tm2d1	protein_coding	0.328958	0.0308807	1.51031	0.339475	1173	1534	1287	1246	993	1227	1233.59	0.152394	2.15861
ENSMUSG00000050234	gap junction protein, alpha 4 [Source:MGI Symbol;Acc:MGI:95715]	Gja4	protein_coding	-0.172984	0.0309085	1.50992	0.339476	14711	17827	14564	20296	21150	18917	17528.4	0.0801504	-2.15825
ENSMUSG00000113996	predicted gene, 48455 [Source:MGI Symbol;Acc:MGI:6097969]	Gm48455	processed_pseudogene	0.484111	0.0309574	1.50924	0.339736	106	200	138	95	103	99	122.152	0.224373	2.15762
ENSMUSG00000082675	predicted gene 6382 [Source:MGI Symbol;Acc:MGI:3646438]	Gm6382	processed_pseudogene	0.209917	0.0309737	1.50901	0.339736	10632	12930	10427	10576	12856	9741	11026.7	0.0973004	2.15741
ENSMUSG00000081819	predicted gene 12722 [Source:MGI Symbol;Acc:MGI:3652209]	Gm12722	processed_pseudogene	0.507594	0.0310263	1.50827	0.340071	68	90	74	45	54	25	59.4274	0.235353	2.15674
ENSMUSG00000021917	signal peptidase complex subunit 1 homolog (S. cerevisiae) [Source:MGI Symbol;Acc:MGI:1916269]	Spcs1	protein_coding	0.340989	0.0310457	1.508	0.340071	1067	1226	1031	1062	827	968	1024.73	0.158123	2.15649
ENSMUSG00000004951	heat shock protein 1 [Source:MGI Symbol;Acc:MGI:96240]	Hspb1	protein_coding	0.473641	0.0311217	1.50694	0.340221	23	66	43	13	23	15	30.2328	0.219735	2.15551
ENSMUSG00000086989	predicted pseudogene 16441 [Source:MGI Symbol;Acc:MGI:3646768]	Gm16441	processed_pseudogene	0.460046	0.0310869	1.50742	0.340221	21	58	45	8	21	15	27.858	0.213383	2.15596
ENSMUSG00000028274	RNA guanylyltransferase and 5'-phosphatase [Source:MGI Symbol;Acc:MGI:1329041]	Rngtt	protein_coding	0.404449	0.0311196	1.50697	0.340221	362	412	496	343	322	353	380.45	0.187632	2.15554
ENSMUSG00000052504	Eph receptor A3 [Source:MGI Symbol;Acc:MGI:99612]	Epha3	protein_coding	-0.507432	0.0311713	1.50624	0.340536	80	523	280	547	893	597	458.245	0.235481	-2.15488
ENSMUSG00000040957	CDK5 and Abl enzyme substrate 1 [Source:MGI Symbol;Acc:MGI:1927065]	Cables1	protein_coding	-0.494651	0.031238	1.50532	0.340811	85	89	78	153	132	215	121.659	0.22964	-2.15403
ENSMUSG00000039209	ribosomal protein L39-like [Source:MGI Symbol;Acc:MGI:1915422]	Rpl39l	protein_coding	-0.432274	0.0312334	1.50538	0.340811	768	762	551	1352	851	1268	906.025	0.200676	-2.15409
ENSMUSG00000022557	block of proliferation 1 [Source:MGI Symbol;Acc:MGI:1334460]	Bop1	protein_coding	0.417425	0.0313916	1.50319	0.34203	643	606	701	511	411	612	581.974	0.193964	2.15207
ENSMUSG00000033793	ATPase, H+ transporting, lysosomal V1 subunit H [Source:MGI Symbol;Acc:MGI:1914864]	Atp6v1h	protein_coding	-0.271984	0.031385	1.50328	0.34203	2029	2326	1623	2562	2882	2873	2324	0.126377	-2.15216
ENSMUSG00000028845	tektin 2 [Source:MGI Symbol;Acc:MGI:1346335]	Tekt2	protein_coding	-0.501498	0.0314957	1.50175	0.342937	107	89	157	262	320	168	177.756	0.233173	-2.15075
ENSMUSG00000040818	DENN/MADD domain containing 6A [Source:MGI Symbol;Acc:MGI:2442980]	Dennd6a	protein_coding	0.202959	0.0315473	1.50104	0.343271	4124	4874	4281	4022	5067	3973	4326.46	0.0943949	2.1501
ENSMUSG00000025583	regulatory associated protein of MTOR, complex 1 [Source:MGI Symbol;Acc:MGI:1921620]	Rptor	protein_coding	-0.505264	0.0316153	1.5001	0.343327	84	302	232	341	642	349	307.488	0.235089	-2.14924
ENSMUSG00000105540	predicted gene 7988 [Source:MGI Symbol;Acc:MGI:3649096]	Gm7988	processed_pseudogene	0.444748	0.0316032	1.50027	0.343327	218	225	187	163	177	133	183.348	0.206918	2.14939
ENSMUSG00000062611	ribosomal protein S3A2 [Source:MGI Symbol;Acc:MGI:3642853]	Rps3a2	processed_pseudogene	0.293861	0.031609	1.50019	0.343327	14	20	17	0	0	0	8.86772	0.136723	2.14932
ENSMUSG00000103876	predicted gene, 17806 [Source:MGI Symbol;Acc:MGI:5009992]	Gm17806	processed_pseudogene	0.346109	0.03172	1.49867	0.344002	17	11	15	1	1	3	8.44723	0.161137	2.14792
ENSMUSG00000113899	predicted gene 9595 [Source:MGI Symbol;Acc:MGI:3780004]	Gm9595	processed_pseudogene	0.316301	0.0317253	1.49859	0.344002	13	10	16	1	1	0	7.24391	0.147264	2.14785
ENSMUSG00000067106	predicted pseudogene 5529 [Source:MGI Symbol;Acc:MGI:3646377]	Gm5529	processed_pseudogene	0.303634	0.0317404	1.49839	0.344002	9	20	16	0	0	1	7.88844	0.141379	2.14766
ENSMUSG00000035455	fidgetin-like 1 [Source:MGI Symbol;Acc:MGI:1890648]	Fignl1	protein_coding	-0.260305	0.0317707	1.49797	0.344102	1711	2527	2197	2725	3417	2707	2476.49	0.121225	-2.14728
ENSMUSG00000032518	ribosomal protein SA [Source:MGI Symbol;Acc:MGI:105381]	Rpsa	protein_coding	0.459865	0.0319024	1.49618	0.345301	25	37	36	15	8	12	22.5311	0.214326	2.14563
ENSMUSG00000079164	toll-like receptor 5 [Source:MGI Symbol;Acc:MGI:1858171]	Tlr5	protein_coding	0.484544	0.0320044	1.49479	0.346176	83	89	105	60	15	43	67.3995	0.225962	2.14436
ENSMUSG00000026393	NIMA (never in mitosis gene a)-related expressed kinase 7 [Source:MGI Symbol;Acc:MGI:1890645]	Nek7	protein_coding	-0.426243	0.0320387	1.49432	0.346275	329	484	630	716	948	753	622.875	0.198814	-2.14393
ENSMUSG00000045268	zinc finger protein 691 [Source:MGI Symbol;Acc:MGI:3041163]	Zfp691	protein_coding	-0.378364	0.0320558	1.49409	0.346275	4	1	9	15	48	41	18.2693	0.176499	-2.14371
ENSMUSG00000060680	predicted gene 8894 [Source:MGI Symbol;Acc:MGI:3643084]	Gm8894	processed_pseudogene	0.302757	0.032144	1.4929	0.346999	11	15	17	0	0	1	7.67101	0.141302	2.14261
ENSMUSG00000031628	caspase 3 [Source:MGI Symbol;Acc:MGI:107739]	Casp3	protein_coding	0.489531	0.0322222	1.49184	0.347614	119	54	153	54	32	65	82.3697	0.228577	2.14164
ENSMUSG00000056820	translin-associated factor X [Source:MGI Symbol;Acc:MGI:1855672]	Tsnax	protein_coding	0.230895	0.0323113	1.49065	0.348346	3576	3613	3388	3092	3887	3241	3427.82	0.107868	2.14054
ENSMUSG00000037935	SWI/SNF related, matrix associated, actin dependent regulator of chromatin, subfamily e, member 1 [Source:MGI Symbol;Acc:MGI:1927347]	Smarce1	protein_coding	0.360124	0.0323616	1.48997	0.348658	531	565	481	470	411	451	482.661	0.168289	2.13992
ENSMUSG00000022820	NADH:ubiquinone oxidoreductase subunit B4 [Source:MGI Symbol;Acc:MGI:1915444]	Ndufb4	protein_coding	0.479117	0.0324272	1.48909	0.349067	183	259	208	171	105	161	181.097	0.22398	2.1391
ENSMUSG00000051316	TATA-box binding protein associated factor 7 [Source:MGI Symbol;Acc:MGI:1346348]	Taf7	protein_coding	-0.249632	0.0324421	1.48889	0.349067	2943	3826	3242	4799	4199	4572	3845.46	0.116709	-2.13892
ENSMUSG00000021890	ELL associated factor 1 [Source:MGI Symbol;Acc:MGI:1921677]	Eaf1	protein_coding	-0.470129	0.0325095	1.48799	0.349334	280	168	217	350	519	385	310.643	0.219883	-2.13809
ENSMUSG00000037337	mitogen-activated protein kinase kinase kinase kinase 1 [Source:MGI Symbol;Acc:MGI:1346882]	Map4k1	protein_coding	-0.422054	0.0324971	1.48816	0.349334	207	202	250	335	442	329	285.787	0.197384	-2.13824
ENSMUSG00000020871	distal-less homeobox 4 [Source:MGI Symbol;Acc:MGI:94904]	Dlx4	protein_coding	-0.292896	0.0325648	1.48725	0.349699	0	0	0	18	35	12	9.84401	0.137033	-2.13741
ENSMUSG00000057068	family with sequence similarity 47, member E [Source:MGI Symbol;Acc:MGI:2686227]	Fam47e	protein_coding	-0.401007	0.0326227	1.48648	0.349862	241	229	273	353	459	395	316.288	0.187676	-2.1367
ENSMUSG00000032514	tetratricopeptide repeat domain 21A [Source:MGI Symbol;Acc:MGI:1921302]	Ttc21a	protein_coding	-0.308883	0.032604	1.48673	0.349862	0	2	0	19	36	10	10.1532	0.144546	-2.13693
ENSMUSG00000115151	predicted gene, 19276 [Source:MGI Symbol;Acc:MGI:5011461]	Gm19276	lincRNA	-0.397957	0.0327056	1.48538	0.350456	47	1	18	89	185	124	72.8051	0.186337	-2.13568
ENSMUSG00000043733	protein tyrosine phosphatase, non-receptor type 11 [Source:MGI Symbol;Acc:MGI:99511]	Ptpn11	protein_coding	0.218562	0.0327209	1.48517	0.350456	1781	2022	1781	1679	2049	1697	1810.8	0.102347	2.13549
ENSMUSG00000078435	expressed sequence AU041133 [Source:MGI Symbol;Acc:MGI:2143755]	AU041133	protein_coding	-0.363969	0.0327856	1.48432	0.350754	0	10	5	25	60	32	20.1536	0.170501	-2.1347
ENSMUSG00000025921	retinol dehydrogenase 10 (all-trans) [Source:MGI Symbol;Acc:MGI:1924238]	Rdh10	protein_coding	-0.181368	0.0327915	1.48424	0.350754	3438	4636	4012	4762	5538	5289	4503.19	0.0849649	-2.13463
ENSMUSG00000001168	2'-5' oligoadenylate synthetase 1H [Source:MGI Symbol;Acc:MGI:2180853]	Oas1h	protein_coding	-0.210492	0.0328169	1.4839	0.350796	9028	12298	9801	13635	13028	14178	11724.4	0.0986227	-2.13432
ENSMUSG00000030753	THAP domain containing 12 [Source:MGI Symbol;Acc:MGI:1920231]	Thap12	protein_coding	-0.28539	0.0328478	1.48349	0.350897	676	724	682	986	1052	907	819.047	0.133739	-2.13394
ENSMUSG00000020361	heat shock protein 4 [Source:MGI Symbol;Acc:MGI:1342292]	Hspa4	protein_coding	-0.173882	0.0328837	1.48302	0.351053	4353	4862	4389	5291	6257	6000	5081.65	0.0815006	-2.1335
ENSMUSG00000079225	predicted gene 9531 [Source:MGI Symbol;Acc:MGI:3779940]	Gm9531	transcribed_processed_pseudogene	0.48946	0.0330044	1.48143	0.351776	35	57	42	15	24	23	32.6499	0.229575	2.13203
ENSMUSG00000086753	predicted gene 15751 [Source:MGI Symbol;Acc:MGI:3783193]	Gm15751	sense_overlapping	-0.484214	0.0330285	1.48111	0.351776	21	13	20	60	51	48	34.277	0.227145	-2.13174
ENSMUSG00000110640	predicted gene 45903 [Source:MGI Symbol;Acc:MGI:5805018]	Gm45903	lincRNA	-0.457743	0.0330586	1.48072	0.351776	156	154	119	197	327	249	193.269	0.214765	-2.13137
ENSMUSG00000031787	katanin p80 (WD40-containing) subunit B 1 [Source:MGI Symbol;Acc:MGI:1921437]	Katnb1	protein_coding	-0.438798	0.0330698	1.48057	0.351776	451	320	409	570	911	589	525.805	0.205889	-2.13123
ENSMUSG00000113212	predicted gene, 47435 [Source:MGI Symbol;Acc:MGI:6096386]	Gm47435	processed_pseudogene	0.420178	0.0331018	1.48015	0.351776	207	301	221	195	180	187	213.327	0.197188	2.13085
ENSMUSG00000059288	chromodomain protein, Y chromosome-like [Source:MGI Symbol;Acc:MGI:1339956]	Cdyl	protein_coding	0.33561	0.0330874	1.48034	0.351776	1914	1821	1389	1369	1443	1660	1590.16	0.157488	2.13102
ENSMUSG00000046351	zinc finger protein 322A [Source:MGI Symbol;Acc:MGI:2442566]	Zfp322a	protein_coding	-0.319236	0.0329812	1.48173	0.351776	802	732	705	1091	1174	1023	901.248	0.149714	-2.13231
ENSMUSG00000031161	histone deacetylase 6 [Source:MGI Symbol;Acc:MGI:1333752]	Hdac6	protein_coding	-0.428366	0.0332225	1.47857	0.352765	707	556	660	732	1467	1113	844.675	0.201169	-2.12938
ENSMUSG00000003234	ATP-binding cassette, sub-family F (GCN20), member 3 [Source:MGI Symbol;Acc:MGI:1351656]	Abcf3	protein_coding	-0.167843	0.0332379	1.47837	0.352765	7745	10499	9135	10792	12729	11444	10144.6	0.0788292	-2.1292
ENSMUSG00000025612	BTB and CNC homology 1, basic leucine zipper transcription factor 1 [Source:MGI Symbol;Acc:MGI:894680]	Bach1	protein_coding	-0.501191	0.0334744	1.47529	0.353172	50	160	90	212	297	151	151.68	0.235705	-2.12635
ENSMUSG00000023861	mitochondrial pyruvate carrier 1 [Source:MGI Symbol;Acc:MGI:1915240]	Mpc1	protein_coding	0.486386	0.0334882	1.47511	0.353172	100	136	106	78	64	81	94.0442	0.22876	2.12618
ENSMUSG00000033105	lanosterol synthase [Source:MGI Symbol;Acc:MGI:1336155]	Lss	protein_coding	0.478048	0.0334401	1.47573	0.353172	473	327	468	293	209	371	361.645	0.224778	2.12676
ENSMUSG00000105277	predicted gene 9504 [Source:MGI Symbol;Acc:MGI:3779914]	Gm9504	processed_pseudogene	0.438794	0.0333728	1.47661	0.353172	45	26	24	6	14	12	21.8408	0.206242	2.12757
ENSMUSG00000112824	predicted gene, 47917 [Source:MGI Symbol;Acc:MGI:6097168]	Gm47917	antisense	0.356775	0.0334689	1.47536	0.353172	22	22	11	5	1	2	10.8932	0.167782	2.12641
ENSMUSG00000018849	WW, C2 and coiled-coil domain containing 1 [Source:MGI Symbol;Acc:MGI:2388637]	Wwc1	protein_coding	-0.325129	0.0334881	1.47511	0.353172	495	718	544	701	941	926	698.842	0.152917	-2.12618
ENSMUSG00000089782	predicted pseudogene 3531 [Source:MGI Symbol;Acc:MGI:3781708]	Gm3531	processed_pseudogene	0.290659	0.0334918	1.47506	0.353172	1369	1686	1285	1379	1434	1120	1362.87	0.136708	2.12614
ENSMUSG00000028463	carbonic anhydrase 9 [Source:MGI Symbol;Acc:MGI:2447188]	Car9	protein_coding	-0.256824	0.0333781	1.47654	0.353172	1753	2355	1637	2565	2911	2383	2207.03	0.120716	-2.12751
ENSMUSG00000046679	expressed sequence C87436 [Source:MGI Symbol;Acc:MGI:2141787]	C87436	protein_coding	-0.251776	0.0334821	1.47519	0.353172	1916	2375	1839	2931	2941	2484	2357.86	0.118413	-2.12625
ENSMUSG00000047832	cell division cycle associated 4 [Source:MGI Symbol;Acc:MGI:1919213]	Cdca4	protein_coding	-0.179749	0.0333452	1.47697	0.353172	2708	3442	2778	3519	4284	3721	3326.78	0.0844724	-2.1279
ENSMUSG00000060450	ring finger protein 14 [Source:MGI Symbol;Acc:MGI:1929668]	Rnf14	protein_coding	-0.173109	0.0335475	1.47434	0.353532	3704	4435	3831	4640	5360	5386	4459.26	0.0814449	-2.12547
ENSMUSG00000117013	C2H2 zinc finger protein pseudogene	CAAA01141682.1	transcribed_processed_pseudogene	-0.496482	0.0336343	1.47322	0.353694	260	273	89	432	494	370	307.564	0.233702	-2.12443
ENSMUSG00000079604	predicted gene 13219 [Source:MGI Symbol;Acc:MGI:3651678]	Gm13219	lincRNA	-0.459498	0.0337275	1.47202	0.353694	9	21	23	28	91	63	36.6025	0.216406	-2.12331
ENSMUSG00000099544	predicted gene, 18699 [Source:MGI Symbol;Acc:MGI:5010884]	Gm18699	processed_pseudogene	0.432091	0.0336685	1.47278	0.353694	196	259	280	181	178	200	214.796	0.203431	2.12402
ENSMUSG00000002804	nudix (nucleoside diphosphate linked moiety X)-type motif 14 [Source:MGI Symbol;Acc:MGI:1913424]	Nudt14	protein_coding	-0.3966	0.0337601	1.4716	0.353694	278	339	227	482	462	396	353.927	0.186818	-2.12293
ENSMUSG00000032127	VPS11, CORVET/HOPS core subunit [Source:MGI Symbol;Acc:MGI:1918982]	Vps11	protein_coding	-0.305361	0.033771	1.47146	0.353694	875	990	1033	1137	1669	1399	1151.83	0.143849	-2.12279
ENSMUSG00000070695	contactin associated protein-like 5A [Source:MGI Symbol;Acc:MGI:3643623]	Cntnap5a	protein_coding	-0.289659	0.0337003	1.47237	0.353694	0	0	0	23	32	10	9.92315	0.136397	-2.12364
ENSMUSG00000031652	NEDD4 binding protein 1 [Source:MGI Symbol;Acc:MGI:2136825]	N4bp1	protein_coding	0.263534	0.0336928	1.47246	0.353694	2294	2629	2267	2179	2655	1891	2290.52	0.12409	2.12373
ENSMUSG00000022292	ribonucleotide reductase M2 B (TP53 inducible) [Source:MGI Symbol;Acc:MGI:2155865]	Rrm2b	protein_coding	0.218488	0.0337262	1.47203	0.353694	2446	2782	2787	2333	2750	2705	2602.82	0.102899	2.12333
ENSMUSG00000019066	RAB3D, member RAS oncogene family [Source:MGI Symbol;Acc:MGI:97844]	Rab3d	protein_coding	-0.214932	0.0336014	1.47364	0.353694	4265	5878	5200	6123	6867	7303	5796.63	0.101153	-2.12482
ENSMUSG00000036309	S-phase kinase-associated protein 1A [Source:MGI Symbol;Acc:MGI:103575]	Skp1a	protein_coding	0.153732	0.0337787	1.47136	0.353694	37880	46734	36357	38750	42776	41300	40011.1	0.0724227	2.1227
ENSMUSG00000066009	zinc finger protein 987 [Source:MGI Symbol;Acc:MGI:3702694]	Zfp987	protein_coding	0.371614	0.0338097	1.47096	0.353793	30	22	14	5	1	6	13.5829	0.175097	2.12233
ENSMUSG00000024594	proline-rich coiled-coil 1 [Source:MGI Symbol;Acc:MGI:1916106]	Prrc1	protein_coding	0.432992	0.0339064	1.46972	0.35436	203	238	193	139	156	187	185.029	0.204128	2.12118
ENSMUSG00000025316	BTG3 associated nuclear protein [Source:MGI Symbol;Acc:MGI:1889023]	Banp	protein_coding	-0.262012	0.0339072	1.46971	0.35436	1917	2834	2670	3343	3531	3320	2862.26	0.123522	-2.12117
ENSMUSG00000033781	ankyrin repeat and SOCS box-containing 13 [Source:MGI Symbol;Acc:MGI:2145525]	Asb13	protein_coding	0.499073	0.0339377	1.46932	0.354414	357	192	156	104	187	139	191.777	0.235322	2.12081
ENSMUSG00000001098	potassium channel tetramerisation domain containing 10 [Source:MGI Symbol;Acc:MGI:2141207]	Kctd10	protein_coding	0.286242	0.0339556	1.46909	0.354414	1781	1792	1673	1566	1493	1739	1663.48	0.134982	2.1206
ENSMUSG00000041977	Rho guanine nucleotide exchange factor (GEF) 11 [Source:MGI Symbol;Acc:MGI:2441869]	Arhgef11	protein_coding	-0.3625	0.0340519	1.46786	0.355193	618	587	777	939	1179	952	821.337	0.171034	-2.11946
ENSMUSG00000027088	phosphatase, orphan 2 [Source:MGI Symbol;Acc:MGI:1920623]	Phospho2	protein_coding	-0.237554	0.034149	1.46662	0.355979	5400	7855	6377	9205	8463	8613	7472.95	0.112143	-2.11831
ENSMUSG00000064344	mitochondrially encoded tRNA methionine [Source:MGI Symbol;Acc:MGI:102480]	mt-Tm	Mt_tRNA	-0.411243	0.0341941	1.46605	0.356223	8	6	4	38	17	31	16.6758	0.194186	-2.11777
ENSMUSG00000093865	leucine-rich repeat, immunoglobulin-like and transmembrane domains 3 [Source:MGI Symbol;Acc:MGI:2685267]	Lrit3	protein_coding	-0.498948	0.0342342	1.46554	0.356269	47	28	47	92	100	98	66.5152	0.235653	-2.1173
ENSMUSG00000092183	RIKEN cDNA 4930515G01 gene [Source:MGI Symbol;Acc:MGI:1914892]	4930515G01Rik	antisense	-0.307314	0.034242	1.46544	0.356269	0	0	2	12	25	25	9.80322	0.145151	-2.11721
ENSMUSG00000020267	histidine triad nucleotide binding protein 1 [Source:MGI Symbol;Acc:MGI:1321133]	Hint1	protein_coding	-0.36652	0.0342763	1.46501	0.3564	1542	1855	1493	3070	1998	2351	2009.49	0.173148	-2.11681
ENSMUSG00000028226	matrix metallopeptidase 16 [Source:MGI Symbol;Acc:MGI:1276107]	Mmp16	protein_coding	-0.498812	0.034352	1.46405	0.356734	45	73	28	113	108	107	75.7045	0.235743	-2.11591
ENSMUSG00000024516	SEC11 homolog C, signal peptidase complex subunit [Source:MGI Symbol;Acc:MGI:1913536]	Sec11c	protein_coding	-0.239937	0.0343435	1.46416	0.356734	1172	1674	1457	1773	2083	1956	1642.23	0.113391	-2.11602
ENSMUSG00000021456	fructose bisphosphatase 2 [Source:MGI Symbol;Acc:MGI:95491]	Fbp2	protein_coding	-0.3935	0.0344295	1.46307	0.357312	274	459	400	509	746	545	471.564	0.186052	-2.11501
ENSMUSG00000041264	ubiquitin specific peptidase like 1 [Source:MGI Symbol;Acc:MGI:2442342]	Uspl1	protein_coding	-0.493123	0.0345595	1.46143	0.357529	98	289	315	363	600	479	340.918	0.233323	-2.11348
ENSMUSG00000049044	Rap guanine nucleotide exchange factor (GEF) 4 [Source:MGI Symbol;Acc:MGI:1917723]	Rapgef4	protein_coding	-0.462545	0.0344956	1.46224	0.357529	387	459	256	520	1000	496	497.717	0.218777	-2.11423
ENSMUSG00000025024	survival motor neuron domain containing 1 [Source:MGI Symbol;Acc:MGI:1923729]	Smndc1	protein_coding	0.37376	0.0345023	1.46215	0.357529	372	647	526	397	444	430	462.782	0.17679	2.11415
ENSMUSG00000055866	period circadian clock 2 [Source:MGI Symbol;Acc:MGI:1195265]	Per2	protein_coding	0.33968	0.0345179	1.46196	0.357529	113	13	67	12	0	12	39.5403	0.160684	2.11397
ENSMUSG00000025144	centromere protein X [Source:MGI Symbol;Acc:MGI:894324]	Cenpx	protein_coding	-0.312339	0.0345536	1.46151	0.357529	1140	1472	1082	1995	1693	1609	1463.26	0.147779	-2.11355
ENSMUSG00000084301	predicted gene 7856 [Source:MGI Symbol;Acc:MGI:3648230]	Gm7856	processed_pseudogene	0.341076	0.0346057	1.46085	0.357563	509	826	586	535	552	552	584.79	0.161422	2.11294
ENSMUSG00000031751	autocrine motility factor receptor [Source:MGI Symbol;Acc:MGI:1345634]	Amfr	protein_coding	-0.180152	0.0346064	1.46084	0.357563	10338	13018	10761	13903	14400	15602	12722.4	0.0852616	-2.11293
ENSMUSG00000064345	mitochondrially encoded NADH dehydrogenase 2 [Source:MGI Symbol;Acc:MGI:102500]	mt-Nd2	protein_coding	-0.336528	0.0346532	1.46026	0.357821	1305	1560	1629	2606	2146	1893	1816.93	0.159312	-2.11239
ENSMUSG00000047613	RIKEN cDNA A430005L14 gene [Source:MGI Symbol;Acc:MGI:2140680]	A430005L14Rik	protein_coding	0.268182	0.0347156	1.45948	0.358014	974	1188	1022	1009	950	983	1010.74	0.127001	2.11166
ENSMUSG00000023960	ectonucleotide pyrophosphatase/phosphodiesterase 5 [Source:MGI Symbol;Acc:MGI:1933830]	Enpp5	protein_coding	-0.263874	0.034706	1.45959	0.358014	2691	3584	2529	3282	4692	4204	3395.28	0.124954	-2.11177
ENSMUSG00000111950	predicted gene, 48893 [Source:MGI Symbol;Acc:MGI:6098656]	Gm48893	lincRNA	-0.385875	0.0347465	1.45909	0.358108	885	856	738	1547	1065	1277	1041	0.182767	-2.1113
ENSMUSG00000071291	zinc finger protein 58 [Source:MGI Symbol;Acc:MGI:99205]	Zfp58	protein_coding	-0.269881	0.0347748	1.45874	0.358174	1032	1333	1201	1592	1554	1792	1384.84	0.127847	-2.11097
ENSMUSG00000081523	predicted gene 13058 [Source:MGI Symbol;Acc:MGI:3650002]	Gm13058	unprocessed_pseudogene	0.442559	0.0348692	1.45756	0.358921	388	892	629	514	401	469	541.779	0.209756	2.10987
ENSMUSG00000051344	pleckstrin homology domain containing, family M, member 3 [Source:MGI Symbol;Acc:MGI:2443627]	Plekhm3	protein_coding	-0.493998	0.0349221	1.4569	0.359014	99	285	316	384	684	400	343.915	0.234205	-2.10926
ENSMUSG00000038344	taxilin gamma [Source:MGI Symbol;Acc:MGI:3590652]	Txlng	protein_coding	0.34324	0.0349015	1.45716	0.359014	1219	1613	920	1020	1184	1007	1144.42	0.162712	2.1095
ENSMUSG00000021375	kinesin family member 13A [Source:MGI Symbol;Acc:MGI:1098264]	Kif13a	protein_coding	-0.38377	0.0353696	1.45137	0.363386	0	33	25	118	110	94	59.4311	0.182391	-2.1041
ENSMUSG00000051527	ubiquitin specific peptidase 29 [Source:MGI Symbol;Acc:MGI:1888998]	Usp29	protein_coding	-0.457167	0.0354585	1.45028	0.364072	217	286	169	303	575	334	300.756	0.21738	-2.10308
ENSMUSG00000078676	cancer susceptibility candidate 3 [Source:MGI Symbol;Acc:MGI:2179723]	Casc3	protein_coding	-0.476174	0.0355052	1.44971	0.364323	99	162	109	188	336	181	171.097	0.226474	-2.10255
ENSMUSG00000081723	predicted gene 15931 [Source:MGI Symbol;Acc:MGI:3805553]	Gm15931	unprocessed_pseudogene	0.494383	0.0356483	1.44796	0.365334	102	90	152	84	44	59	90.2776	0.235318	2.10092
ENSMUSG00000092570	PDX1 associated lncRNA, upregulator of transcription [Source:MGI Symbol;Acc:MGI:1917397]	Plut	antisense	-0.393554	0.0356414	1.44805	0.365334	238	324	273	494	392	431	349.638	0.187318	-2.101
ENSMUSG00000055933	oocyte secreted protein 3 [Source:MGI Symbol;Acc:MGI:2684943]	Oosp3	protein_coding	-0.486347	0.0357436	1.4468	0.365396	5633	5439	5140	15183	6827	10110	7894.94	0.231612	-2.09983
ENSMUSG00000021732	fibroblast growth factor 10 [Source:MGI Symbol;Acc:MGI:1099809]	Fgf10	protein_coding	0.454557	0.0357009	1.44732	0.365396	228	251	273	181	141	220	216.172	0.216423	2.10032
ENSMUSG00000052031	T cell activation GTPase activating protein 1 [Source:MGI Symbol;Acc:MGI:1919786]	Tagap1	protein_coding	0.401856	0.0357128	1.44718	0.365396	44	28	33	2	18	9	23.0444	0.191343	2.10018
ENSMUSG00000029790	centrosomal protein 41 [Source:MGI Symbol;Acc:MGI:1891414]	Cep41	protein_coding	-0.248971	0.0357422	1.44682	0.365396	1753	2080	1973	2333	3213	2435	2238.36	0.118566	-2.09985
ENSMUSG00000067547	predicted pseudogene 7666 [Source:MGI Symbol;Acc:MGI:3648907]	Gm7666	transcribed_processed_pseudogene	0.403461	0.0358072	1.44603	0.365819	303	359	343	293	231	272	299.375	0.192206	2.09911
ENSMUSG00000027552	E2F transcription factor 5 [Source:MGI Symbol;Acc:MGI:105091]	E2f5	protein_coding	-0.155738	0.0359482	1.44432	0.36703	13577	17819	13955	18587	19975	18691	16716.3	0.0742487	-2.09751
ENSMUSG00000068747	sortilin 1 [Source:MGI Symbol;Acc:MGI:1338015]	Sort1	protein_coding	-0.278853	0.0360616	1.44295	0.367803	872	894	890	1240	1230	1267	1043.74	0.133026	-2.09623
ENSMUSG00000037072	selenoprotein F [Source:MGI Symbol;Acc:MGI:1927947]	Selenof	protein_coding	-0.256641	0.0360688	1.44287	0.367803	2949	4172	3107	5000	4464	4445	3927.46	0.122434	-2.09615
ENSMUSG00000001300	ephrin B2 [Source:MGI Symbol;Acc:MGI:105097]	Efnb2	protein_coding	-0.310085	0.0360967	1.44253	0.367859	1062	1183	1181	1290	2053	1664	1365.79	0.147953	-2.09584
ENSMUSG00000082575	predicted gene 13050 [Source:MGI Symbol;Acc:MGI:3650664]	Gm13050	processed_pseudogene	0.464407	0.0362453	1.44075	0.369143	143	282	186	138	126	156	169.898	0.221762	2.09416
ENSMUSG00000027612	matrix metallopeptidase 24 [Source:MGI Symbol;Acc:MGI:1341867]	Mmp24	protein_coding	-0.471178	0.0363789	1.43915	0.370224	105	169	162	272	201	335	201.23	0.225157	-2.09267
ENSMUSG00000094242	predicted gene 5456 [Source:MGI Symbol;Acc:MGI:3643775]	Gm5456	processed_pseudogene	0.280732	0.0363966	1.43894	0.370224	22	16	12	0	0	0	8.86382	0.134163	2.09247
ENSMUSG00000030671	phosphodiesterase 3B, cGMP-inhibited [Source:MGI Symbol;Acc:MGI:1333863]	Pde3b	protein_coding	-0.337597	0.0364242	1.43861	0.370275	1332	1465	1619	1898	2919	1841	1792.22	0.161363	-2.09216
ENSMUSG00000024304	cadherin 2 [Source:MGI Symbol;Acc:MGI:88355]	Cdh2	protein_coding	0.470311	0.0365042	1.43766	0.370398	207	388	389	147	294	237	273.58	0.224893	2.09127
ENSMUSG00000047045	transmembrane protein 164 [Source:MGI Symbol;Acc:MGI:2148020]	Tmem164	protein_coding	-0.349927	0.0364723	1.43804	0.370398	1782	1474	2027	2201	3079	2843	2181.57	0.167299	-2.09162
ENSMUSG00000083574	predicted gene 15709 [Source:MGI Symbol;Acc:MGI:3783150]	Gm15709	processed_pseudogene	0.291046	0.0364955	1.43776	0.370398	8	21	15	1	0	0	7.68151	0.139166	2.09136
ENSMUSG00000112575	predicted gene, 31849 [Source:MGI Symbol;Acc:MGI:5591008]	Gm31849	processed_pseudogene	0.344352	0.0365427	1.4372	0.370561	14	12	15	2	3	1	8.17207	0.164696	2.09084
ENSMUSG00000074731	zinc finger protein 345 [Source:MGI Symbol;Acc:MGI:3652219]	Zfp345	protein_coding	0.4034	0.0365669	1.43691	0.370577	1551	2159	1455	1358	955	1728	1524.27	0.192962	2.09057
ENSMUSG00000031353	retinoblastoma binding protein 7, chromatin remodeling factor [Source:MGI Symbol;Acc:MGI:1194910]	Rbbp7	protein_coding	0.208438	0.0367594	1.43463	0.372297	26102	29722	24942	25126	30959	23010	26272.1	0.0998062	2.08843
ENSMUSG00000025733	ras homolog family member T2 [Source:MGI Symbol;Acc:MGI:2384892]	Rhot2	protein_coding	-0.454627	0.0368172	1.43395	0.372422	181	357	260	373	677	375	353.949	0.217756	-2.08779
ENSMUSG00000026869	proteasome (prosome, macropain) 26S subunit, non-ATPase, 5 [Source:MGI Symbol;Acc:MGI:1914248]	Psmd5	protein_coding	-0.240878	0.0368139	1.43399	0.372422	3415	3805	3478	5082	4505	4893	4115.15	0.115373	-2.08782
ENSMUSG00000048721	fibronectin type III domain containing 9 [Source:MGI Symbol;Acc:MGI:2443410]	Fndc9	protein_coding	-0.491695	0.0369259	1.43267	0.373291	64	32	63	109	150	119	86.5098	0.235646	-2.08658
ENSMUSG00000032806	solute carrier family 10 (sodium/bile acid cotransporter family), member 3 [Source:MGI Symbol;Acc:MGI:95048]	Slc10a3	protein_coding	-0.465532	0.0369599	1.43227	0.373405	508	491	227	615	1033	646	564.144	0.223148	-2.08621
ENSMUSG00000036192	RAR-related orphan receptor beta [Source:MGI Symbol;Acc:MGI:1343464]	Rorb	protein_coding	0.335608	0.0370126	1.43165	0.373476	20	14	11	1	4	1	8.88329	0.160915	2.08562
ENSMUSG00000034317	tripartite motif-containing 59 [Source:MGI Symbol;Acc:MGI:1914199]	Trim59	protein_coding	0.182865	0.0370062	1.43173	0.373476	2591	3248	2915	2715	3236	2769	2868.76	0.0876759	2.0857
ENSMUSG00000022769	stromal cell-derived factor 2-like 1 [Source:MGI Symbol;Acc:MGI:2149842]	Sdf2l1	protein_coding	-0.356148	0.0371646	1.42987	0.374549	393	621	500	645	956	698	613.866	0.1709	-2.08395
ENSMUSG00000042406	activating transcription factor 4 [Source:MGI Symbol;Acc:MGI:88096]	Atf4	protein_coding	-0.279861	0.0371508	1.43003	0.374549	2596	3960	2403	4066	4309	4055	3463.51	0.134284	-2.0841
ENSMUSG00000048230	F-box protein 43 [Source:MGI Symbol;Acc:MGI:1926053]	Fbxo43	protein_coding	-0.221525	0.0372221	1.4292	0.374897	4354	4320	3962	5575	6020	5366	4834.12	0.106332	-2.08332
ENSMUSG00000025484	Bet1 golgi vesicular membrane trafficking protein like [Source:MGI Symbol;Acc:MGI:1913128]	Bet1l	protein_coding	-0.461104	0.0373766	1.4274	0.37578	9	34	20	61	86	43	39.6796	0.221511	-2.08163
ENSMUSG00000075327	zinc finger and BTB domain containing 2 [Source:MGI Symbol;Acc:MGI:2685949]	Zbtb2	protein_coding	0.276636	0.0373341	1.42789	0.37578	635	846	674	644	672	657	679.295	0.132865	2.08209
ENSMUSG00000010376	neural precursor cell expressed, developmentally down-regulated gene 8 [Source:MGI Symbol;Acc:MGI:97301]	Nedd8	protein_coding	-0.276143	0.0373785	1.42738	0.37578	988	1447	1173	1756	1730	1522	1399.45	0.132658	-2.08161
ENSMUSG00000056895	histone cluster 3, H2ba [Source:MGI Symbol;Acc:MGI:1925553]	Hist3h2ba	protein_coding	0.490619	0.0374162	1.42694	0.375888	102	81	62	42	50	51	65.303	0.235739	2.08119
ENSMUSG00000032318	insulin related protein 2 (islet 2) [Source:MGI Symbol;Acc:MGI:109156]	Isl2	protein_coding	-0.309468	0.0374352	1.42672	0.375888	676	666	589	955	940	904	771.518	0.148712	-2.08099
ENSMUSG00000112612	predicted gene 7775 [Source:MGI Symbol;Acc:MGI:3646054]	Gm7775	processed_pseudogene	0.489986	0.0374786	1.42622	0.376094	84	110	59	41	57	51	66.6921	0.235512	2.08051
ENSMUSG00000024422	DEAH (Asp-Glu-Ala-His) box polypeptide 16 [Source:MGI Symbol;Acc:MGI:1916442]	Dhx16	protein_coding	0.307548	0.0377125	1.42351	0.37821	1014	1164	890	781	917	1043	957.875	0.148004	2.07797
ENSMUSG00000040717	interleukin 17 receptor D [Source:MGI Symbol;Acc:MGI:2159727]	Il17rd	protein_coding	-0.312956	0.0377618	1.42295	0.378473	576	922	751	966	1264	1018	887.758	0.150646	-2.07743
ENSMUSG00000095288	predicted pseudogene 7618 [Source:MGI Symbol;Acc:MGI:3644742]	Gm7618	processed_pseudogene	0.29986	0.0377879	1.42265	0.378503	19	24	17	3	0	0	10.9374	0.144362	2.07715
ENSMUSG00000061603	A kinase (PRKA) anchor protein 6 [Source:MGI Symbol;Acc:MGI:3050566]	Akap6	protein_coding	0.448638	0.0378974	1.42139	0.379368	203	187	146	119	142	132	154.732	0.216111	2.07596
ENSMUSG00000031754	nudix (nucleoside diphosphate linked moiety X)-type motif 21 [Source:MGI Symbol;Acc:MGI:1915469]	Nudt21	protein_coding	0.372566	0.0380711	1.4194	0.380641	16	31	22	1	8	6	14.1149	0.179629	2.07409
ENSMUSG00000047905	predicted pseudogene 8566 [Source:MGI Symbol;Acc:MGI:3647296]	Gm8566	processed_pseudogene	0.331683	0.0380689	1.41943	0.380641	646	727	589	622	560	521	606.629	0.159916	2.07411
ENSMUSG00000103473	predicted gene, 37696 [Source:MGI Symbol;Acc:MGI:5610924]	Gm37696	antisense	0.393847	0.0381294	1.41874	0.380992	30	38	15	11	3	7	17.6868	0.189947	2.07346
ENSMUSG00000044763	tRNA methyltransferase 10C [Source:MGI Symbol;Acc:MGI:1196261]	Trmt10c	protein_coding	-0.409016	0.0381668	1.41831	0.381133	534	511	395	856	616	877	618.156	0.1973	-2.07306
ENSMUSG00000020640	intersectin 2 [Source:MGI Symbol;Acc:MGI:1338049]	Itsn2	protein_coding	-0.169577	0.0382291	1.41761	0.381523	3871	4780	4497	5171	6117	5586	4892.44	0.0818266	-2.07239
ENSMUSG00000063383	zinc finger protein 947 [Source:MGI Symbol;Acc:MGI:3646759]	Zfp947	protein_coding	0.462538	0.0383349	1.41641	0.382113	236	75	68	73	41	54	95.2656	0.223313	2.07126
ENSMUSG00000052825	predicted gene 9892 [Source:MGI Symbol;Acc:MGI:3701610]	Gm9892	processed_pseudogene	0.294194	0.03833	1.41646	0.382113	2508	2362	2069	1922	2550	1878	2194.55	0.142033	2.07131
ENSMUSG00000046782	tetratricopeptide repeat domain 6 [Source:MGI Symbol;Acc:MGI:2684915]	Ttc6	protein_coding	-0.437898	0.0383816	1.41588	0.382346	520	334	310	632	654	761	523.177	0.211468	-2.07076
ENSMUSG00000027751	suppressor of Ty 20 [Source:MGI Symbol;Acc:MGI:1929651]	Supt20	protein_coding	-0.219953	0.0384764	1.41481	0.383058	2210	2552	2029	2974	2983	3079	2581.39	0.106271	-2.06974
ENSMUSG00000112378	predicted gene, 47261 [Source:MGI Symbol;Acc:MGI:6096095]	Gm47261	processed_pseudogene	0.479044	0.0386024	1.41339	0.384021	64	74	40	33	35	20	44.5374	0.231601	2.0684
ENSMUSG00000045404	potassium channel, subfamily K, member 13 [Source:MGI Symbol;Acc:MGI:2384976]	Kcnk13	protein_coding	-0.303034	0.0386201	1.41319	0.384021	1300	2375	1735	2352	2782	2545	2113.18	0.14652	-2.06821
ENSMUSG00000025163	CD7 antigen [Source:MGI Symbol;Acc:MGI:88344]	Cd7	protein_coding	0.263806	0.0387392	1.41185	0.384972	1622	2189	2172	1847	1831	1868	1900.14	0.127631	2.06695
ENSMUSG00000038070	centlein, centrosomal protein [Source:MGI Symbol;Acc:MGI:2443104]	Cntln	protein_coding	-0.484926	0.0387989	1.41118	0.385143	202	229	81	238	488	357	253.476	0.234682	-2.06631
ENSMUSG00000046449	neurite extension and migration factor [Source:MGI Symbol;Acc:MGI:2148050]	Nexmif	protein_coding	-0.47728	0.0388034	1.41113	0.385143	236	142	342	369	558	537	353.149	0.230987	-2.06627
ENSMUSG00000092242	predicted gene 20515 [Source:MGI Symbol;Acc:MGI:5141980]	Gm20515	lincRNA	-0.46943	0.0389029	1.41002	0.385897	21	23	38	69	121	45	50.1623	0.227303	-2.06521
ENSMUSG00000030905	crystallin, mu [Source:MGI Symbol;Acc:MGI:102675]	Crym	protein_coding	-0.47228	0.0389863	1.40909	0.386491	33	102	25	83	169	171	91.1701	0.228781	-2.06433
ENSMUSG00000064337	mitochondrially encoded 12S rRNA [Source:MGI Symbol;Acc:MGI:102493]	mt-Rnr1	Mt_rRNA	-0.461781	0.0390624	1.40824	0.386544	771	525	550	1629	805	978	863.281	0.223782	-2.06353
ENSMUSG00000081111	predicted gene 5913 [Source:MGI Symbol;Acc:MGI:3648292]	Gm5913	processed_pseudogene	0.382515	0.0390505	1.40837	0.386544	318	401	329	274	253	325	314.52	0.185358	2.06365
ENSMUSG00000029840	myotrophin [Source:MGI Symbol;Acc:MGI:99445]	Mtpn	protein_coding	-0.254944	0.0390161	1.40876	0.386544	1685	2376	1688	2226	3058	2596	2205.12	0.123518	-2.06402
ENSMUSG00000067336	bone morphogenetic protein receptor, type II (serine/threonine kinase) [Source:MGI Symbol;Acc:MGI:1095407]	Bmpr2	protein_coding	-0.415348	0.0391619	1.40714	0.38706	594	514	614	839	1368	712	749.337	0.201382	-2.06248
ENSMUSG00000029736	NOBOX oogenesis homeobox [Source:MGI Symbol;Acc:MGI:108011]	Nobox	protein_coding	-0.167451	0.0391453	1.40732	0.38706	11717	15002	12456	15478	16714	17768	14528.9	0.081182	-2.06266
ENSMUSG00000030662	importin 5 [Source:MGI Symbol;Acc:MGI:1917822]	Ipo5	protein_coding	-0.395172	0.0392558	1.4061	0.387723	409	566	676	672	1093	907	696.763	0.191692	-2.0615
ENSMUSG00000020948	kelch-like 28 [Source:MGI Symbol;Acc:MGI:1913939]	Klhl28	protein_coding	-0.304266	0.0392762	1.40587	0.387723	711	924	775	978	1457	1047	952.351	0.14761	-2.06128
ENSMUSG00000038271	intermediate filament family orphan 1 [Source:MGI Symbol;Acc:MGI:2444516]	Iffo1	protein_coding	-0.386443	0.0393324	1.40525	0.388044	313	505	487	546	855	670	543.063	0.187531	-2.06069
ENSMUSG00000060336	zinc finger protein 937 [Source:MGI Symbol;Acc:MGI:3644476]	Zfp937	protein_coding	0.485194	0.0394097	1.4044	0.388484	67	99	59	42	43	47	59.267	0.235544	2.05988
ENSMUSG00000045132	olfactory receptor 620 [Source:MGI Symbol;Acc:MGI:3030454]	Olfr620	protein_coding	0.374967	0.0394245	1.40423	0.388484	16	18	14	3	4	4	10.0817	0.182047	2.05973
ENSMUSG00000022791	tyrosine kinase, non-receptor, 2 [Source:MGI Symbol;Acc:MGI:1858308]	Tnk2	protein_coding	0.333168	0.0394836	1.40358	0.388833	1029	1018	758	749	818	878	868.974	0.161802	2.05911
ENSMUSG00000068487	NADH:ubiquinone oxidoreductase subunit A11B [Source:MGI Symbol;Acc:MGI:3645174]	Ndufa11b	processed_pseudogene	0.356146	0.039586	1.40246	0.389607	342	430	326	319	326	280	333.962	0.173051	2.05804
ENSMUSG00000110795	predicted gene, 47179 [Source:MGI Symbol;Acc:MGI:6095965]	Gm47179	TEC	0.453505	0.0396837	1.40139	0.389654	26	83	63	20	36	15	40.0944	0.220466	2.05703
ENSMUSG00000040565	B-TFIID TATA-box binding protein associated factor 1 [Source:MGI Symbol;Acc:MGI:2147538]	Btaf1	protein_coding	-0.371105	0.0396711	1.40153	0.389654	689	971	1256	1410	1598	1526	1208.1	0.180397	-2.05716
ENSMUSG00000056185	sorting nexin 32 [Source:MGI Symbol;Acc:MGI:2444704]	Snx32	protein_coding	-0.336237	0.0396859	1.40136	0.389654	0	4	19	31	127	53	35.6213	0.16346	-2.057
ENSMUSG00000043091	tubulin, alpha 1C [Source:MGI Symbol;Acc:MGI:1095409]	Tuba1c	protein_coding	0.331425	0.0396849	1.40137	0.389654	743	927	833	711	627	828	772.393	0.161119	2.05701
ENSMUSG00000022195	RIKEN cDNA 6030458C11 gene [Source:MGI Symbol;Acc:MGI:1925127]	6030458C11Rik	protein_coding	-0.227133	0.0397532	1.40063	0.389848	2691	2658	2409	3349	3658	3458	2975.79	0.110457	-2.0563
ENSMUSG00000018736	nudE neurodevelopment protein 1 like 1 [Source:MGI Symbol;Acc:MGI:1932915]	Ndel1	protein_coding	-0.179324	0.0397424	1.40075	0.389848	4081	5546	4640	5885	6752	5732	5308.91	0.0872021	-2.05642
ENSMUSG00000004270	lysophosphatidylcholine acyltransferase 3 [Source:MGI Symbol;Acc:MGI:1315211]	Lpcat3	protein_coding	0.467896	0.039782	1.40031	0.389897	199	65	86	34	73	64	89.6588	0.227575	2.05601
ENSMUSG00000114558	predicted gene 9570 [Source:MGI Symbol;Acc:MGI:3779980]	Gm9570	processed_pseudogene	0.342034	0.0398379	1.3997	0.390211	663	687	836	547	729	625	676.472	0.166405	2.05543
ENSMUSG00000060739	NSA2 ribosome biogenesis homolog [Source:MGI Symbol;Acc:MGI:1913883]	Nsa2	protein_coding	0.484498	0.0398647	1.39941	0.390241	82	93	62	56	40	39	62.3593	0.235748	2.05515
ENSMUSG00000109564	mucin 16 [Source:MGI Symbol;Acc:MGI:1920982]	Muc16	protein_coding	0.442945	0.0399654	1.39832	0.39076	260	119	110	18	50	130	118.376	0.215639	2.05411
ENSMUSG00000051675	tripartite motif-containing 32 [Source:MGI Symbol;Acc:MGI:1917057]	Trim32	protein_coding	-0.392291	0.0399539	1.39844	0.39076	243	316	209	321	479	429	321.549	0.190968	-2.05423
ENSMUSG00000083763	predicted gene 9050 [Source:MGI Symbol;Acc:MGI:3644215]	Gm9050	processed_pseudogene	0.40868	0.0400006	1.39793	0.390871	23	24	29	4	13	7	16.9913	0.198993	2.05374
ENSMUSG00000019951	UHRF1 (ICBP90) binding protein 1-like [Source:MGI Symbol;Acc:MGI:2442888]	Uhrf1bp1l	protein_coding	-0.434166	0.0400616	1.39727	0.391233	436	310	387	627	884	489	507.353	0.211467	-2.05311
ENSMUSG00000111444	predicted gene, 47923 [Source:MGI Symbol;Acc:MGI:6097180]	Gm47923	lincRNA	-0.349128	0.0401315	1.39651	0.391683	657	893	502	1012	1049	1009	828.857	0.170108	-2.05239
ENSMUSG00000111965	predicted gene 4797 [Source:MGI Symbol;Acc:MGI:3644095]	Gm4797	processed_pseudogene	-0.392187	0.0402354	1.39539	0.391857	11	10	7	17	99	23	25.5052	0.191187	-2.05132
ENSMUSG00000081389	predicted gene 13368 [Source:MGI Symbol;Acc:MGI:3651966]	Gm13368	processed_pseudogene	0.329443	0.0402787	1.39492	0.391857	427	504	447	415	385	398	426.171	0.160635	2.05088
ENSMUSG00000033318	glutathione S-transferase, theta 2 [Source:MGI Symbol;Acc:MGI:106188]	Gstt2	protein_coding	-0.317728	0.0402036	1.39574	0.391857	445	552	452	681	652	771	577.901	0.154865	-2.05165
ENSMUSG00000034211	mitochondrial ribosomal protein S17 [Source:MGI Symbol;Acc:MGI:1913508]	Mrps17	protein_coding	-0.288827	0.0402929	1.39477	0.391857	1304	1762	1091	1826	2172	1862	1621.74	0.140841	-2.05073
ENSMUSG00000030814	B cell CLL/lymphoma 7C [Source:MGI Symbol;Acc:MGI:1332237]	Bcl7c	protein_coding	-0.270529	0.0402916	1.39479	0.391857	1062	1290	1008	1665	1564	1430	1306.13	0.131917	-2.05075
ENSMUSG00000030342	CD9 antigen [Source:MGI Symbol;Acc:MGI:88348]	Cd9	protein_coding	0.226451	0.0402	1.39577	0.391857	1740	2006	1752	1583	1784	1921	1776.19	0.110373	2.05169
ENSMUSG00000038324	transient receptor potential cation channel, subfamily C, member 4 associated protein [Source:MGI Symbol;Acc:MGI:1930751]	Trpc4ap	protein_coding	-0.149266	0.0404387	1.3932	0.393042	7223	8342	7296	8917	10028	9942	8446.79	0.0728396	-2.04924
ENSMUSG00000090389	Cdv3 retrotransposed pseudogene [Source:MGI Symbol;Acc:MGI:3646628]	Cdv3-ps	processed_pseudogene	0.472839	0.0405255	1.39227	0.393652	90	124	120	58	96	67	91.942	0.230839	2.04835
ENSMUSG00000025991	carbamoyl-phosphate synthetase 1 [Source:MGI Symbol;Acc:MGI:891996]	Cps1	protein_coding	0.481999	0.0406506	1.39093	0.3937	185	164	131	90	60	137	129.235	0.235457	2.04708
ENSMUSG00000114443	predicted gene, 19241 [Source:MGI Symbol;Acc:MGI:5011426]	Gm19241	processed_pseudogene	0.452029	0.0406463	1.39098	0.3937	34	29	36	14	13	15	24.0192	0.220812	2.04712
ENSMUSG00000025237	poly (ADP-ribose) polymerase family, member 6 [Source:MGI Symbol;Acc:MGI:1914537]	Parp6	protein_coding	-0.43081	0.0405551	1.39195	0.3937	195	396	199	407	443	474	338.991	0.210351	-2.04805
ENSMUSG00000083397	predicted gene 5466 [Source:MGI Symbol;Acc:MGI:3647828]	Gm5466	processed_pseudogene	0.383427	0.0406486	1.39095	0.3937	25	24	16	4	10	3	13.9666	0.187303	2.0471
ENSMUSG00000026917	WD repeat domain 5 [Source:MGI Symbol;Acc:MGI:2155884]	Wdr5	protein_coding	-0.198257	0.0405963	1.39151	0.3937	6894	8014	7407	9458	9334	10417	8415.83	0.0968229	-2.04763
ENSMUSG00000086688	predicted gene 11560 [Source:MGI Symbol;Acc:MGI:3652066]	Gm11560	processed_pseudogene	0.438914	0.0407256	1.39013	0.393783	149	184	160	94	147	125	142.032	0.21449	2.04631
ENSMUSG00000031278	acyl-CoA synthetase long-chain family member 4 [Source:MGI Symbol;Acc:MGI:1354713]	Acsl4	protein_coding	-0.387107	0.040743	1.38995	0.393783	287	281	234	444	388	442	338.139	0.189189	-2.04614
ENSMUSG00000117248	ERH mRNA splicing and mitosis factor (Erh) pseudogene	AC122481.2	processed_pseudogene	0.279614	0.0407552	1.38982	0.393783	18	15	8	0	1	0	7.36437	0.136663	2.04601
ENSMUSG00000032434	CKLF-like MARVEL transmembrane domain containing 6 [Source:MGI Symbol;Acc:MGI:2447165]	Cmtm6	protein_coding	-0.235003	0.0407108	1.39029	0.393783	1103	1487	1334	1685	1766	1828	1497.79	0.114834	-2.04646
ENSMUSG00000024191	BCL2/adenovirus E1B interacting protein 1 [Source:MGI Symbol;Acc:MGI:109328]	Bnip1	protein_coding	-0.325785	0.0408104	1.38923	0.394084	914	981	925	1300	1778	1113	1136.31	0.159273	-2.04545
ENSMUSG00000050605	zinc finger protein 61 [Source:MGI Symbol;Acc:MGI:99663]	Zfp61	protein_coding	-0.222413	0.0408444	1.38887	0.394179	1721	2333	1930	2522	3062	2402	2268.14	0.108754	-2.04511
ENSMUSG00000020687	cell division cycle 27 [Source:MGI Symbol;Acc:MGI:102685]	Cdc27	protein_coding	-0.231933	0.0409435	1.38782	0.394903	3985	4364	4850	5542	6115	6211	5070.83	0.113465	-2.0441
ENSMUSG00000037572	WD repeat and HMG-box DNA binding protein 1 [Source:MGI Symbol;Acc:MGI:2443514]	Wdhd1	protein_coding	-0.338714	0.040981	1.38742	0.395033	884	1107	1340	1500	1605	1878	1352.12	0.165734	-2.04372
ENSMUSG00000030850	arginyltransferase 1 [Source:MGI Symbol;Acc:MGI:1333870]	Ate1	protein_coding	-0.359421	0.0410375	1.38682	0.395345	381	534	346	559	793	575	513.5	0.175915	-2.04315
ENSMUSG00000037996	solute carrier family 24 (sodium/potassium/calcium exchanger), member 2 [Source:MGI Symbol;Acc:MGI:1923626]	Slc24a2	protein_coding	-0.466918	0.0411334	1.38581	0.395804	85	238	184	317	305	324	232.778	0.228637	-2.04218
ENSMUSG00000114023	predicted gene 6474 [Source:MGI Symbol;Acc:MGI:3648182]	Gm6474	processed_pseudogene	0.41564	0.041127	1.38587	0.395804	280	272	243	229	186	200	235.167	0.203521	2.04225
ENSMUSG00000036855	gap junction protein, delta 4 [Source:MGI Symbol;Acc:MGI:2444990]	Gjd4	protein_coding	-0.277377	0.0413087	1.38396	0.397257	0	0	1	9	63	7	11.7938	0.135941	-2.04042
ENSMUSG00000028876	Eph receptor A10 [Source:MGI Symbol;Acc:MGI:3586824]	Epha10	protein_coding	-0.361354	0.0413698	1.38332	0.397611	8	109	1	210	230	209	118.651	0.177151	-2.0398
ENSMUSG00000109190	predicted gene 44621 [Source:MGI Symbol;Acc:MGI:5753197]	Gm44621	lincRNA	-0.279315	0.0416022	1.38088	0.39946	1223	1620	1046	1801	1853	1769	1511.64	0.137089	-2.03748
ENSMUSG00000037013	SS18, nBAF chromatin remodeling complex subunit [Source:MGI Symbol;Acc:MGI:107708]	Ss18	protein_coding	0.27122	0.041611	1.38079	0.39946	2959	3237	2997	2586	3586	2397	2923.43	0.133121	2.03739
ENSMUSG00000099102	predicted gene 11983 [Source:MGI Symbol;Acc:MGI:3650519]	Gm11983	protein_coding	-0.332853	0.0416953	1.37991	0.399801	1	2	3	12	31	11	9.17551	0.16344	-2.03655
ENSMUSG00000039977	deuterosome assembly protein 1 [Source:MGI Symbol;Acc:MGI:2443026]	Deup1	protein_coding	-0.269714	0.0416854	1.38002	0.399801	0	0	0	15	35	11	9.19646	0.132431	-2.03665
ENSMUSG00000028082	SH3 domain protein D19 [Source:MGI Symbol;Acc:MGI:1350923]	Sh3d19	protein_coding	0.369961	0.0418346	1.37846	0.400844	1298	959	1169	785	1038	1075	1053.58	0.181785	2.03516
ENSMUSG00000024829	mitochondrial ribosomal protein L21 [Source:MGI Symbol;Acc:MGI:2660674]	Mrpl21	protein_coding	0.338154	0.0418529	1.37827	0.400844	670	724	590	557	691	473	611.617	0.166171	2.03498
ENSMUSG00000094985	testis and ovary specific PAZ domain containing 1 [Source:MGI Symbol;Acc:MGI:3779933]	Topaz1	protein_coding	-0.474015	0.0420305	1.37644	0.401971	70	118	140	232	159	261	158.533	0.233135	-2.03322
ENSMUSG00000020741	clustered mitochondria (cluA/CLU1) homolog [Source:MGI Symbol;Acc:MGI:1921398]	Cluh	protein_coding	-0.453938	0.0420864	1.37586	0.401971	197	193	277	274	420	544	307.571	0.223322	-2.03267
ENSMUSG00000026339	coiled-coil domain containing 93 [Source:MGI Symbol;Acc:MGI:1918079]	Ccdc93	protein_coding	-0.394535	0.0420018	1.37673	0.401971	276	357	426	524	710	482	448.255	0.194017	-2.0335
ENSMUSG00000032511	sodium channel, voltage-gated, type V, alpha [Source:MGI Symbol;Acc:MGI:98251]	Scn5a	protein_coding	-0.267981	0.0420836	1.37589	0.401971	0	0	0	8	87	10	15.3617	0.131835	-2.03269
ENSMUSG00000031781	cytokine induced apoptosis inhibitor 1 [Source:MGI Symbol;Acc:MGI:1922083]	Ciapin1	protein_coding	-0.244587	0.0420933	1.37579	0.401971	2921	3773	3140	4871	4241	4179	3771.37	0.120332	-2.0326
ENSMUSG00000031813	multivesicular body subunit 12A [Source:MGI Symbol;Acc:MGI:1920961]	Mvb12a	protein_coding	-0.444594	0.0421559	1.37514	0.402186	130	257	203	371	276	380	261.153	0.218798	-2.03198
ENSMUSG00000030000	adducin 2 (beta) [Source:MGI Symbol;Acc:MGI:87919]	Add2	protein_coding	-0.435889	0.0421648	1.37505	0.402186	299	362	247	360	784	456	400.685	0.214524	-2.03189
ENSMUSG00000081656	predicted gene 11246 [Source:MGI Symbol;Acc:MGI:3651881]	Gm11246	processed_pseudogene	0.476156	0.0422246	1.37443	0.402522	80	107	116	60	51	77	82.076	0.23441	2.0313
ENSMUSG00000024132	enoyl-Coenzyme A delta isomerase 1 [Source:MGI Symbol;Acc:MGI:94871]	Eci1	protein_coding	-0.478252	0.0423479	1.37317	0.402785	41	115	43	140	180	119	100.845	0.235582	-2.03008
ENSMUSG00000004328	hypoxia inducible factor 3, alpha subunit [Source:MGI Symbol;Acc:MGI:1859778]	Hif3a	protein_coding	0.477732	0.0424606	1.37201	0.402785	240	171	386	195	111	178	217.914	0.235455	2.02898
ENSMUSG00000040464	GTP-binding protein 10 (putative) [Source:MGI Symbol;Acc:MGI:2385599]	Gtpbp10	protein_coding	0.432995	0.0423995	1.37264	0.402785	251	355	426	219	339	217	298.697	0.213342	2.02958
ENSMUSG00000048490	nuclear receptor interacting protein 1 [Source:MGI Symbol;Acc:MGI:1315213]	Nrip1	protein_coding	-0.423787	0.0424548	1.37207	0.402785	659	604	619	791	1671	811	827.688	0.208861	-2.02903
ENSMUSG00000064061	DAZ interacting protein 3, zinc finger [Source:MGI Symbol;Acc:MGI:1917433]	Dzip3	protein_coding	-0.373426	0.0424157	1.37247	0.402785	435	370	453	540	735	720	528.653	0.184007	-2.02942
ENSMUSG00000072595	RIKEN cDNA 4930503E14 gene [Source:MGI Symbol;Acc:MGI:1922204]	4930503E14Rik	protein_coding	0.325742	0.0424734	1.37188	0.402785	39	26	21	3	0	9	17.1845	0.160555	2.02885
ENSMUSG00000042541	SEM1, 26S proteasome complex subunit [Source:MGI Symbol;Acc:MGI:109238]	Sem1	protein_coding	-0.256061	0.0424527	1.37209	0.402785	1402	1721	1411	2246	2047	1912	1750.71	0.126197	-2.02906
ENSMUSG00000029012	origin recognition complex, subunit 5 [Source:MGI Symbol;Acc:MGI:1347044]	Orc5	protein_coding	-0.244877	0.0424327	1.3723	0.402785	10762	13766	10517	16863	14123	16306	13431	0.120674	-2.02925
ENSMUSG00000073233	predicted gene 9144 [Source:MGI Symbol;Acc:MGI:3643264]	Gm9144	processed_pseudogene	0.235626	0.0423008	1.37365	0.402785	1257	1434	1177	1141	1397	1160	1244.49	0.116041	2.03055
ENSMUSG00000103158	predicted gene, 31925 [Source:MGI Symbol;Acc:MGI:5591084]	Gm31925	lincRNA	-0.399302	0.0426524	1.37006	0.404248	678	879	789	1574	897	1276	994.493	0.196982	-2.0271
ENSMUSG00000028364	tenascin C [Source:MGI Symbol;Acc:MGI:101922]	Tnc	protein_coding	-0.344933	0.0427057	1.36951	0.404519	0	43	6	111	95	105	55.9543	0.170205	-2.02658
ENSMUSG00000083159	predicted gene 12180 [Source:MGI Symbol;Acc:MGI:3651495]	Gm12180	processed_pseudogene	0.476785	0.0428123	1.36843	0.405294	91	89	50	38	54	38	60.1803	0.235387	2.02554
ENSMUSG00000019822	sphingomyelin phosphodiesterase 2, neutral [Source:MGI Symbol;Acc:MGI:1278330]	Smpd2	protein_coding	0.463117	0.0429558	1.36698	0.405675	152	128	149	81	131	84	121.081	0.228797	2.02414
ENSMUSG00000028107	threonyl-tRNA synthetase 2, mitochondrial (putative) [Source:MGI Symbol;Acc:MGI:1919057]	Tars2	protein_coding	-0.427034	0.0429311	1.36723	0.405675	168	393	291	483	486	458	366.2	0.210946	-2.02438
ENSMUSG00000027639	SAM domain and HD domain, 1 [Source:MGI Symbol;Acc:MGI:1927468]	Samhd1	protein_coding	-0.332191	0.042879	1.36776	0.405675	895	1580	958	1598	1956	1477	1363.07	0.164054	-2.02489
ENSMUSG00000100277	RIKEN cDNA 1810053B23 gene [Source:MGI Symbol;Acc:MGI:1917107]	1810053B23Rik	processed_transcript	-0.265981	0.0429578	1.36696	0.405675	0	0	0	20	85	4	16.1122	0.131406	-2.02412
ENSMUSG00000032563	mitochondrial ribosomal protein L3 [Source:MGI Symbol;Acc:MGI:2137204]	Mrpl3	protein_coding	-0.24632	0.0429762	1.36677	0.405675	965	1148	922	1396	1365	1366	1167.25	0.121703	-2.02394
ENSMUSG00000062175	TGFB-induced factor homeobox 2 [Source:MGI Symbol;Acc:MGI:1915299]	Tgif2	protein_coding	0.457563	0.0430392	1.36614	0.405802	27	88	96	27	35	34	50.9956	0.226144	2.02333
ENSMUSG00000040749	siah E3 ubiquitin protein ligase 1B [Source:MGI Symbol;Acc:MGI:108063]	Siah1b	protein_coding	0.230923	0.0430295	1.36623	0.405802	3129	4318	3602	3332	4157	3072	3543.24	0.114125	2.02342
ENSMUSG00000098015	predicted gene 44527 [Source:MGI Symbol;Acc:MGI:5753103]	Gm44527	transcribed_unprocessed_pseudogene	0.420834	0.043123	1.36529	0.406358	915	1309	915	832	507	1010	910.497	0.208074	2.02252
ENSMUSG00000097027	predicted gene, 26559 [Source:MGI Symbol;Acc:MGI:5477053]	Gm26559	bidirectional_promoter_lncRNA	-0.44257	0.0431826	1.36469	0.406686	180	184	103	245	307	280	209.444	0.218884	-2.02194
ENSMUSG00000101932	predicted gene 10074 [Source:MGI Symbol;Acc:MGI:3708632]	Gm10074	processed_pseudogene	0.455468	0.0432788	1.36373	0.407357	56	51	57	36	14	24	40.5998	0.225367	2.02101
ENSMUSG00000108654	predicted gene 9519 [Source:MGI Symbol;Acc:MGI:3779928]	Gm9519	unprocessed_pseudogene	-0.451003	0.0433636	1.36287	0.407922	157	106	167	263	261	273	199.741	0.223248	-2.02019
ENSMUSG00000104031	predicted gene, 17771 [Source:MGI Symbol;Acc:MGI:5009935]	Gm17771	processed_pseudogene	0.353149	0.0434395	1.36211	0.408401	32	18	18	6	1	7	14.3841	0.174873	2.01946
ENSMUSG00000032301	proteasome (prosome, macropain) subunit, alpha type 4 [Source:MGI Symbol;Acc:MGI:1347060]	Psma4	protein_coding	0.373083	0.043552	1.36099	0.409224	781	652	697	648	522	596	650.682	0.184843	2.01838
ENSMUSG00000022026	olfactomedin 4 [Source:MGI Symbol;Acc:MGI:2685142]	Olfm4	protein_coding	-0.31665	0.0437298	1.35922	0.410424	0	26	1	81	118	51	42.3952	0.157016	-2.01667
ENSMUSG00000000811	thioredoxin reductase 3 [Source:MGI Symbol;Acc:MGI:2386711]	Txnrd3	protein_coding	0.222772	0.0437105	1.35941	0.410424	2448	2653	2472	2319	2375	2613	2455.59	0.110455	2.01686
ENSMUSG00000040761	spen family transcription repressor [Source:MGI Symbol;Acc:MGI:1891706]	Spen	protein_coding	0.465281	0.0439718	1.35683	0.410968	87	179	63	79	40	39	80.6824	0.230982	2.01436
ENSMUSG00000097366	predicted gene 8177 [Source:MGI Symbol;Acc:MGI:3805962]	Gm8177	processed_pseudogene	0.463189	0.0440135	1.35641	0.410968	32	53	53	18	28	22	34.3575	0.229989	2.01396
ENSMUSG00000000605	chloride channel, voltage-sensitive 4 [Source:MGI Symbol;Acc:MGI:104571]	Clcn4	protein_coding	-0.436545	0.0439766	1.35678	0.410968	43	32	64	75	332	60	94.0903	0.216721	-2.01431
ENSMUSG00000111108	predicted gene, 17795 [Source:MGI Symbol;Acc:MGI:5009981]	Gm17795	processed_pseudogene	0.411539	0.0440079	1.35647	0.410968	165	217	211	151	173	136	174.262	0.204338	2.01402
ENSMUSG00000025155	dihydrouridine synthase 1-like (S. cerevisiae) [Source:MGI Symbol;Acc:MGI:1915980]	Dus1l	protein_coding	-0.401816	0.0439812	1.35673	0.410968	287	517	371	695	511	671	494.166	0.199485	-2.01427
ENSMUSG00000058586	serine hydrolase-like [Source:MGI Symbol;Acc:MGI:1890404]	Serhl	protein_coding	-0.357969	0.0439681	1.35686	0.410968	425	542	457	620	972	603	583.307	0.177705	-2.01439
ENSMUSG00000116790	zona pellucida glycoprotein 2 (Zp2) pseudogene	AC115731.1	processed_pseudogene	0.354316	0.043959	1.35695	0.410968	256	305	270	220	251	232	253.454	0.175885	2.01448
ENSMUSG00000018211	WAP four-disulfide core domain 15B [Source:MGI Symbol;Acc:MGI:2445041]	Wfdc15b	protein_coding	-0.305925	0.0439674	1.35687	0.410968	0	2	4	12	54	13	12.7801	0.151869	-2.0144
ENSMUSG00000024425	Nedd4 family interacting protein 1 [Source:MGI Symbol;Acc:MGI:1929601]	Ndfip1	protein_coding	-0.262135	0.0439864	1.35668	0.410968	1478	2371	1689	2348	2558	2674	2125.36	0.130142	-2.01422
ENSMUSG00000028692	aldo-keto reductase family 1, member A1 (aldehyde reductase) [Source:MGI Symbol;Acc:MGI:1929955]	Akr1a1	protein_coding	-0.250655	0.044125	1.35532	0.411775	4253	5381	3626	6069	5735	6213	5091.12	0.124524	-2.0129
ENSMUSG00000021810	ecdysoneless cell cycle regulator [Source:MGI Symbol;Acc:MGI:1917851]	Ecd	protein_coding	-0.229632	0.0444078	1.35254	0.414178	2149	3100	2216	3279	3305	3362	2829.33	0.114232	-2.01022
ENSMUSG00000083119	predicted gene 14724 [Source:MGI Symbol;Acc:MGI:3705618]	Gm14724	processed_pseudogene	0.26199	0.0444537	1.35209	0.41437	16	19	11	0	0	0	8.00656	0.130357	2.00979
ENSMUSG00000033124	autophagy related 9A [Source:MGI Symbol;Acc:MGI:2138446]	Atg9a	protein_coding	0.271137	0.0445618	1.35104	0.415141	835	1106	1020	903	878	940	936.668	0.134977	2.00877
ENSMUSG00000081643	predicted gene 11605 [Source:MGI Symbol;Acc:MGI:3651339]	Gm11605	processed_pseudogene	0.472557	0.0446426	1.35025	0.415658	51	89	71	40	50	28	54.5572	0.235337	2.00801
ENSMUSG00000021215	neuroepithelial cell transforming gene 1 [Source:MGI Symbol;Acc:MGI:1927138]	Net1	protein_coding	0.271666	0.0446858	1.34983	0.415824	1341	1697	1737	1222	1686	1520	1513.63	0.135319	2.0076
ENSMUSG00000060487	sterile alpha motif domain containing 5 [Source:MGI Symbol;Acc:MGI:2444815]	Samd5	protein_coding	-0.47069	0.0448153	1.34857	0.416084	94	137	50	183	169	216	136.184	0.234596	-2.00638
ENSMUSG00000032306	mannose phosphate isomerase [Source:MGI Symbol;Acc:MGI:97075]	Mpi	protein_coding	-0.366763	0.0448122	1.3486	0.416084	231	301	199	333	415	382	300.591	0.182795	-2.00641
ENSMUSG00000114812	predicted gene, 48254 [Source:MGI Symbol;Acc:MGI:6097669]	Gm48254	processed_pseudogene	0.297598	0.0447973	1.34875	0.416084	20	16	11	3	0	1	8.94891	0.148313	2.00655
ENSMUSG00000033952	abnormal spindle microtubule assembly [Source:MGI Symbol;Acc:MGI:1334448]	Aspm	protein_coding	-0.245159	0.0447524	1.34918	0.416084	16371	18813	17151	25823	20914	24237	20166.1	0.122153	-2.00697
ENSMUSG00000080899	predicted gene 9109 [Source:MGI Symbol;Acc:MGI:3646301]	Gm9109	processed_pseudogene	0.445373	0.0448716	1.34803	0.416371	175	188	161	127	159	91	149.656	0.222036	2.00586
ENSMUSG00000031068	glutaredoxin 3 [Source:MGI Symbol;Acc:MGI:1353653]	Glrx3	protein_coding	0.413589	0.0450285	1.34651	0.417354	214	235	220	192	152	170	197.033	0.206342	2.00439
ENSMUSG00000106230	predicted gene, 29811 [Source:MGI Symbol;Acc:MGI:5588970]	Gm29811	lincRNA	-0.303202	0.0450241	1.34655	0.417354	740	1060	683	1107	1380	1069	975.958	0.151266	-2.00443
ENSMUSG00000005150	WD repeat domain containing 83 [Source:MGI Symbol;Acc:MGI:1915086]	Wdr83	protein_coding	0.465793	0.0451926	1.34493	0.418638	119	112	46	51	37	55	70.7131	0.232564	2.00286
ENSMUSG00000034990	otoancorin [Source:MGI Symbol;Acc:MGI:2149209]	Otoa	protein_coding	-0.406398	0.0452302	1.34457	0.41875	383	635	281	663	774	671	547.104	0.202945	-2.00251
ENSMUSG00000057402	claudin 34B2 [Source:MGI Symbol;Acc:MGI:1920597]	Cldn34b2	protein_coding	0.455868	0.04529	1.344	0.418892	366	351	211	224	152	257	261.237	0.227712	2.00195
ENSMUSG00000113606	predicted gene, 47441 [Source:MGI Symbol;Acc:MGI:6096395]	Gm47441	processed_pseudogene	0.33627	0.0452967	1.34393	0.418892	11	15	13	2	3	2	7.861	0.167976	2.00189
ENSMUSG00000094437	predicted gene 9830 [Source:MGI Symbol;Acc:MGI:3704332]	Gm9830	processed_pseudogene	0.471513	0.0453423	1.3435	0.419077	57	75	56	26	43	39	49.2058	0.235584	2.00147
ENSMUSG00000068396	ribosomal protein L34, pseudogene 1 [Source:MGI Symbol;Acc:MGI:3704270]	Rpl34-ps1	processed_pseudogene	0.259884	0.045456	1.34241	0.419891	17	12	16	0	0	0	8.01086	0.129915	2.00041
ENSMUSG00000040018	cytochrome c oxidase assembly protein 15 [Source:MGI Symbol;Acc:MGI:1920112]	Cox15	protein_coding	-0.470889	0.0455838	1.34119	0.420361	96	191	88	143	490	215	191.258	0.235536	-1.99923
ENSMUSG00000035547	calpain 5 [Source:MGI Symbol;Acc:MGI:1100859]	Capn5	protein_coding	0.449269	0.0455712	1.34131	0.420361	215	56	128	37	60	94	102.194	0.224708	1.99934
ENSMUSG00000068940	T cell leukemia/lymphoma 1B, 3 [Source:MGI Symbol;Acc:MGI:1351600]	Tcl1b3	protein_coding	0.257987	0.0455457	1.34155	0.420361	3484	4839	3948	3444	4788	3244	3890.57	0.129021	1.99958
ENSMUSG00000034022	cleavage and polyadenylation specific factor 1 [Source:MGI Symbol;Acc:MGI:2679722]	Cpsf1	protein_coding	-0.460402	0.0456892	1.34019	0.421096	164	491	459	484	925	718	514.728	0.230402	-1.99825
ENSMUSG00000106827	predicted gene 7556 [Source:MGI Symbol;Acc:MGI:3645467]	Gm7556	processed_pseudogene	0.377498	0.0457626	1.33949	0.421158	14	28	25	9	6	3	14.3688	0.188978	1.99758
ENSMUSG00000096687	major facilitator superfamily domain containing 4B4 [Source:MGI Symbol;Acc:MGI:3035041]	Mfsd4b4	protein_coding	0.375837	0.0457987	1.33915	0.421158	848	700	779	713	547	657	709.521	0.188178	1.99724
ENSMUSG00000104923	predicted gene 5865 [Source:MGI Symbol;Acc:MGI:3645504]	Gm5865	processed_pseudogene	0.294131	0.0457806	1.33932	0.421158	780	1110	737	699	888	773	817.59	0.147256	1.99741
ENSMUSG00000005470	anti-silencing function 1B histone chaperone [Source:MGI Symbol;Acc:MGI:1914179]	Asf1b	protein_coding	-0.203502	0.045737	1.33973	0.421158	3343	4766	4006	5341	5406	5093	4549.9	0.101863	-1.99781
ENSMUSG00000083364	LLP homolog, pseudogene 2 [Source:MGI Symbol;Acc:MGI:3642864]	Llph-ps2	processed_pseudogene	0.431128	0.0458541	1.33862	0.421431	201	181	149	117	144	136	154.538	0.215916	1.99673
ENSMUSG00000082806	ribosomal protein L13, pseudogene 1 [Source:MGI Symbol;Acc:MGI:3649805]	Rpl13-ps1	processed_pseudogene	0.258662	0.0460248	1.33701	0.422763	20	7	24	0	0	0	9.25176	0.129645	1.99517
ENSMUSG00000055827	gasdermin C3 [Source:MGI Symbol;Acc:MGI:3580656]	Gsdmc3	protein_coding	0.468471	0.046085	1.33644	0.423078	149	255	457	153	186	200	233.817	0.234868	1.99461
ENSMUSG00000024863	mannose-binding lectin (protein C) 2 [Source:MGI Symbol;Acc:MGI:96924]	Mbl2	protein_coding	-0.252922	0.0461477	1.33585	0.423417	2763	3371	2560	4272	3667	3907	3350.53	0.126839	-1.99404
ENSMUSG00000041313	solute carrier family 7 (cationic amino acid transporter, y+ system), member 1 [Source:MGI Symbol;Acc:MGI:88117]	Slc7a1	protein_coding	0.411558	0.0462924	1.33449	0.424507	248	474	427	276	350	255	333.701	0.206531	1.99272
ENSMUSG00000028367	thioredoxin 1 [Source:MGI Symbol;Acc:MGI:98874]	Txn1	protein_coding	0.315272	0.0463819	1.33365	0.42509	472	595	545	467	548	410	500.502	0.158277	1.9919
ENSMUSG00000046157	transmembrane protein 229B [Source:MGI Symbol;Acc:MGI:2444389]	Tmem229b	protein_coding	0.434623	0.0464118	1.33337	0.425126	396	691	629	488	278	464	489.242	0.218225	1.99163
ENSMUSG00000001794	calpain, small subunit 1 [Source:MGI Symbol;Acc:MGI:88266]	Capns1	protein_coding	0.335008	0.046451	1.333	0.425248	377	398	361	307	329	348	351	0.168238	1.99127
ENSMUSG00000051951	X-linked Kx blood group related 4 [Source:MGI Symbol;Acc:MGI:3528744]	Xkr4	protein_coding	-0.303986	0.046695	1.33073	0.427121	0	5	8	5	76	69	24.6767	0.152829	-1.98906
ENSMUSG00000028552	epidermal growth factor receptor pathway substrate 15 [Source:MGI Symbol;Acc:MGI:104583]	Eps15	protein_coding	-0.26461	0.0467078	1.33061	0.427121	1090	1341	1461	1659	1880	1874	1514.79	0.133041	-1.98894
ENSMUSG00000022613	myo-inositol oxygenase [Source:MGI Symbol;Acc:MGI:1891725]	Miox	protein_coding	-0.172841	0.0467487	1.33023	0.427257	6336	7539	6235	8725	9046	8031	7491.05	0.0869172	-1.98857
ENSMUSG00000022283	poly(A) binding protein, cytoplasmic 1 [Source:MGI Symbol;Acc:MGI:1349722]	Pabpc1	protein_coding	0.456309	0.0467883	1.32986	0.42738	94	75	70	28	71	23	60.6628	0.229507	1.98821
ENSMUSG00000112404	novel transcript	AC159282.1	lincRNA	-0.319386	0.0468209	1.32956	0.42744	823	1230	1227	1725	1505	1535	1308.53	0.160664	-1.98792
ENSMUSG00000025485	RIC8 guanine nucleotide exchange factor A [Source:MGI Symbol;Acc:MGI:2141866]	Ric8a	protein_coding	-0.336877	0.0471049	1.32693	0.429793	0	7	26	54	111	62	40.2302	0.169681	-1.98536
ENSMUSG00000000631	myosin XVIIIA [Source:MGI Symbol;Acc:MGI:2667185]	Myo18a	protein_coding	-0.354211	0.0471579	1.32645	0.430037	746	764	1013	1010	1589	1317	1043.29	0.178454	-1.98488
ENSMUSG00000020993	trafficking protein particle complex 6B [Source:MGI Symbol;Acc:MGI:1925482]	Trappc6b	protein_coding	0.31619	0.0472728	1.32539	0.430845	910	1468	951	1028	971	893	1021.51	0.159382	1.98385
ENSMUSG00000103198	predicted gene 9136 [Source:MGI Symbol;Acc:MGI:3645180]	Gm9136	processed_pseudogene	0.311335	0.0473157	1.32499	0.430997	782	1287	910	762	884	967	916.788	0.156965	1.98346
ENSMUSG00000111932	predicted gene, 18899 [Source:MGI Symbol;Acc:MGI:5011084]	Gm18899	processed_pseudogene	0.397417	0.0474653	1.32362	0.431689	239	235	193	166	183	181	198.804	0.200501	1.98212
ENSMUSG00000069270	histone cluster 1, H2ac [Source:MGI Symbol;Acc:MGI:2448287]	Hist1h2ac	protein_coding	-0.386878	0.0474708	1.32357	0.431689	4	17	7	28	66	22	22.1722	0.195188	-1.98208
ENSMUSG00000041870	ankyrin repeat domain 13a [Source:MGI Symbol;Acc:MGI:1915670]	Ankrd13a	protein_coding	-0.195372	0.0474381	1.32387	0.431689	6940	9306	8229	9262	12581	10232	9180.49	0.0985549	-1.98237
ENSMUSG00000073497	expressed sequence AA792892 [Source:MGI Symbol;Acc:MGI:2140789]	AA792892	protein_coding	0.394932	0.0475093	1.32322	0.4318	328	357	245	267	241	228	276.422	0.199286	1.98173
ENSMUSG00000020801	mediator complex subunit 31 [Source:MGI Symbol;Acc:MGI:1914529]	Med31	protein_coding	-0.361554	0.0475604	1.32275	0.432025	595	1005	735	1418	1090	1026	951.854	0.182486	-1.98128
ENSMUSG00000053985	zinc finger protein 14 [Source:MGI Symbol;Acc:MGI:99160]	Zfp14	protein_coding	-0.319296	0.0476111	1.32229	0.432246	0	8	3	39	17	30	15.29	0.161194	-1.98082
ENSMUSG00000006301	transmembrane BAX inhibitor motif containing 1 [Source:MGI Symbol;Acc:MGI:1916910]	Tmbim1	protein_coding	-0.159203	0.047689	1.32158	0.432713	3079	4040	3389	4134	4660	4536	3882.89	0.0804	-1.98013
ENSMUSG00000026587	astrotactin 1 [Source:MGI Symbol;Acc:MGI:1098567]	Astn1	protein_coding	0.465566	0.048164	1.31728	0.432763	58	82	75	52	35	36	56.581	0.23562	1.97592
ENSMUSG00000108767	predicted gene, 29763 [Source:MGI Symbol;Acc:MGI:5588922]	Gm29763	processed_pseudogene	0.460729	0.0480312	1.31848	0.432763	51	49	61	22	39	26	41.6627	0.233034	1.97709
ENSMUSG00000058603	ribosomal protein L28, pseudogene 1 [Source:MGI Symbol;Acc:MGI:3705349]	Rpl28-ps1	processed_pseudogene	0.455997	0.0480549	1.31826	0.432763	73	61	51	24	50	22	47.2059	0.230665	1.97688
ENSMUSG00000060073	proteasome (prosome, macropain) subunit, alpha type 3 [Source:MGI Symbol;Acc:MGI:104883]	Psma3	protein_coding	0.445922	0.0481783	1.31715	0.432763	179	176	135	122	93	128	139.281	0.225693	1.97579
ENSMUSG00000031310	zinc finger, MYM-type 3 [Source:MGI Symbol;Acc:MGI:1927231]	Zmym3	protein_coding	-0.442019	0.0480684	1.31814	0.432763	156	144	99	191	318	223	181.774	0.223607	-1.97676
ENSMUSG00000051166	echinoderm microtubule associated protein like 5 [Source:MGI Symbol;Acc:MGI:2442513]	Eml5	protein_coding	-0.430353	0.0477451	1.32107	0.432763	26	44	28	43	213	54	62.9254	0.217391	-1.97963
ENSMUSG00000050002	idnK gluconokinase homolog (E. coli) [Source:MGI Symbol;Acc:MGI:1922981]	Idnk	protein_coding	-0.388214	0.0480513	1.31829	0.432763	188	220	156	272	364	272	237.558	0.196374	-1.97691
ENSMUSG00000027371	fumarylacetoacetate hydrolase domain containing 2A [Source:MGI Symbol;Acc:MGI:1915376]	Fahd2a	protein_coding	-0.378002	0.0478008	1.32056	0.432763	173	268	177	290	360	319	255.663	0.190994	-1.97913
ENSMUSG00000032422	sorting nexin 14 [Source:MGI Symbol;Acc:MGI:2155664]	Snx14	protein_coding	-0.353894	0.0478831	1.31982	0.432763	313	375	397	456	696	521	445.75	0.178879	-1.9784
ENSMUSG00000108702	predicted gene 9333 [Source:MGI Symbol;Acc:MGI:3643231]	Gm9333	processed_pseudogene	0.313704	0.0481086	1.31778	0.432763	803	920	849	641	982	672	800.928	0.158724	1.97641
ENSMUSG00000071645	terminal uridylyl transferase 1, U6 snRNA-specific [Source:MGI Symbol;Acc:MGI:1917294]	Tut1	protein_coding	-0.305221	0.047812	1.32046	0.432763	1001	1604	948	1527	1925	1629	1392.71	0.154227	-1.97904
ENSMUSG00000043831	LysM, putative peptidoglycan-binding, domain containing 4 [Source:MGI Symbol;Acc:MGI:1922349]	Lysmd4	protein_coding	-0.302388	0.0479558	1.31916	0.432763	2016	1934	2452	3219	2899	3150	2563.77	0.152894	-1.97776
ENSMUSG00000078444	predicted gene 10941 [Source:MGI Symbol;Acc:MGI:3779151]	Gm10941	bidirectional_promoter_lncRNA	-0.279719	0.0482227	1.31675	0.432763	0	3	0	21	17	20	9.46065	0.141601	-1.9754
ENSMUSG00000033053	RIKEN cDNA 1700028P14 gene [Source:MGI Symbol;Acc:MGI:1914733]	1700028P14Rik	protein_coding	-0.278945	0.0482015	1.31694	0.432763	0	3	0	16	30	15	9.73124	0.141196	-1.97559
ENSMUSG00000116908	TEC	AC154232.2	TEC	0.276326	0.0480128	1.31864	0.432763	27	15	15	3	0	0	10.6969	0.139752	1.97725
ENSMUSG00000026659	dual specificity phosphatase 12 [Source:MGI Symbol;Acc:MGI:1890614]	Dusp12	protein_coding	-0.273047	0.048145	1.31745	0.432763	1486	1781	1203	2109	2035	2074	1739.36	0.138176	-1.97609
ENSMUSG00000019872	sphingomyelin phosphodiesterase, acid-like 3A [Source:MGI Symbol;Acc:MGI:1931437]	Smpdl3a	protein_coding	-0.25617	0.048064	1.31818	0.432763	0	0	0	12	37	11	8.99142	0.129588	-1.9768
ENSMUSG00000038379	Ttk protein kinase [Source:MGI Symbol;Acc:MGI:1194921]	Ttk	protein_coding	-0.208383	0.0480988	1.31787	0.432763	5631	6498	6883	7856	9567	7854	7216.34	0.105431	-1.97649
ENSMUSG00000006932	catenin (cadherin associated protein), beta 1 [Source:MGI Symbol;Acc:MGI:88276]	Ctnnb1	protein_coding	-0.175552	0.0481464	1.31744	0.432763	4623	6087	4681	6477	6659	6574	5718.56	0.088839	-1.97607
ENSMUSG00000047777	PHD finger protein 13 [Source:MGI Symbol;Acc:MGI:2446217]	Phf13	protein_coding	-0.16832	0.0479876	1.31887	0.432763	5949	7215	6356	7259	9600	8233	7258.99	0.0851184	-1.97748
ENSMUSG00000059820	NKAP domain containing 1 [Source:MGI Symbol;Acc:MGI:2143205]	Nkapd1	protein_coding	0.382897	0.0482883	1.31616	0.432877	417	380	302	279	348	271	331.317	0.193889	1.97482
ENSMUSG00000082473	kinesin family member 22, pseudogene [Source:MGI Symbol;Acc:MGI:109206]	Kif22-ps	processed_pseudogene	0.354927	0.0482874	1.31617	0.432877	270	373	328	273	301	241	294.51	0.179725	1.97483
ENSMUSG00000043036	coiled-coil domain containing 63 [Source:MGI Symbol;Acc:MGI:3607777]	Ccdc63	protein_coding	-0.447794	0.0483717	1.31541	0.432915	96	104	95	140	260	154	135.958	0.226836	-1.97409
ENSMUSG00000087368	cDNA sequence BC065397 [Source:MGI Symbol;Acc:MGI:3584520]	BC065397	processed_transcript	-0.319616	0.0483627	1.31549	0.432915	1	2	3	14	28	9	8.76234	0.161899	-1.97417
ENSMUSG00000030486	zinc finger protein 108 [Source:MGI Symbol;Acc:MGI:1891198]	Zfp108	protein_coding	-0.189233	0.0483578	1.31553	0.432915	4777	6584	5836	7254	7440	7576	6429.85	0.0958524	-1.97421
ENSMUSG00000051034	zinc finger protein 11 [Source:MGI Symbol;Acc:MGI:99156]	Zfp11	protein_coding	-0.254763	0.0484504	1.3147	0.433383	0	0	0	4	70	19	13.6605	0.129099	-1.9734
ENSMUSG00000020297	neuron specific gene family member 2 [Source:MGI Symbol;Acc:MGI:1202070]	Nsg2	protein_coding	0.443765	0.0487015	1.31246	0.434917	36	47	50	25	13	23	32.7905	0.225125	1.9712
ENSMUSG00000100222	proteasome (prosome, macropain) subunit, beta type 6, pseudogene 2 [Source:MGI Symbol;Acc:MGI:109264]	Psmb6-ps2	processed_pseudogene	0.245705	0.0486856	1.3126	0.434917	900	1020	849	863	919	833	887.397	0.124639	1.97133
ENSMUSG00000092284	predicted gene 8801 [Source:MGI Symbol;Acc:MGI:3779813]	Gm8801	unprocessed_pseudogene	-0.211189	0.048692	1.31254	0.434917	3334	4825	4114	5170	5318	5661	4624.42	0.107133	-1.97128
ENSMUSG00000027133	NOP10 ribonucleoprotein [Source:MGI Symbol;Acc:MGI:1913431]	Nop10	protein_coding	0.356826	0.0488243	1.31136	0.435775	831	774	694	733	559	637	704.33	0.181118	1.97012
ENSMUSG00000052397	ezrin [Source:MGI Symbol;Acc:MGI:98931]	Ezr	protein_coding	0.439176	0.0489953	1.30985	0.436826	370	246	245	166	270	197	249.896	0.223087	1.96863
ENSMUSG00000027799	neurobeachin [Source:MGI Symbol;Acc:MGI:1347075]	Nbea	protein_coding	-0.368414	0.0489939	1.30986	0.436826	267	282	319	496	463	398	362.35	0.187141	-1.96864
ENSMUSG00000031376	ATPase, Ca++ transporting, plasma membrane 3 [Source:MGI Symbol;Acc:MGI:1347353]	Atp2b3	protein_coding	-0.366341	0.04912	1.30874	0.437462	221	354	319	463	517	402	367.771	0.186191	-1.96755
ENSMUSG00000105011	predicted gene 43210 [Source:MGI Symbol;Acc:MGI:5663347]	Gm43210	TEC	-0.263948	0.0491101	1.30883	0.437462	1	0	0	8	41	9	8.78977	0.134145	-1.96763
ENSMUSG00000033918	presenilin associated, rhomboid-like [Source:MGI Symbol;Acc:MGI:1277152]	Parl	protein_coding	0.201185	0.0491755	1.30825	0.437718	8874	10232	7976	8229	10351	8048	8819.03	0.102277	1.96707
ENSMUSG00000042328	HPS4, biogenesis of lysosomal organelles complex 3 subunit 2 [Source:MGI Symbol;Acc:MGI:2177742]	Hps4	protein_coding	0.320038	0.049251	1.30759	0.437914	437	545	492	447	401	439	456.536	0.162752	1.96641
ENSMUSG00000082872	predicted gene 15773 [Source:MGI Symbol;Acc:MGI:3783214]	Gm15773	processed_pseudogene	0.226592	0.0492496	1.3076	0.437914	1282	1402	1294	1125	1444	1272	1286.96	0.115231	1.96642
ENSMUSG00000006273	ATPase, H+ transporting, lysosomal V1 subunit B2 [Source:MGI Symbol;Acc:MGI:109618]	Atp6v1b2	protein_coding	-0.161146	0.0493192	1.30698	0.438283	3137	3991	3239	3948	4852	4402	3835.4	0.0819739	-1.96582
ENSMUSG00000067367	Ly1 antibody reactive clone [Source:MGI Symbol;Acc:MGI:107470]	Lyar	protein_coding	0.203449	0.0494772	1.30559	0.439449	2320	2504	2438	2131	2686	2336	2372.61	0.103565	1.96446
ENSMUSG00000047603	zinc finger protein 235 [Source:MGI Symbol;Acc:MGI:1929117]	Zfp235	protein_coding	-0.358645	0.0496261	1.30429	0.440532	526	487	683	829	859	948	706.537	0.182686	-1.96317
ENSMUSG00000110617	predicted gene 5910 [Source:MGI Symbol;Acc:MGI:3646687]	Gm5910	processed_pseudogene	0.349221	0.0496962	1.30368	0.440677	545	953	755	672	575	631	680.118	0.177941	1.96257
ENSMUSG00000092746	7S RNA 6 [Source:MGI Symbol;Acc:MGI:97956]	Rn7s6	misc_RNA	0.303452	0.0496697	1.30391	0.440677	17	14	7	1	3	1	7.44323	0.154602	1.9628
ENSMUSG00000116536	myosin, light chain 12B, regulatory (Myl12b) pseudogene	AC132099.1	processed_pseudogene	0.420665	0.0497514	1.30319	0.440798	30	38	22	11	10	15	21.2018	0.214396	1.96209
ENSMUSG00000061859	PATJ, crumbs cell polarity complex component [Source:MGI Symbol;Acc:MGI:1277960]	Patj	protein_coding	-0.280955	0.0497636	1.30309	0.440798	2262	3532	3579	4057	4985	4148	3656.09	0.143199	-1.96199
ENSMUSG00000021178	protease (prosome, macropain) 26S subunit, ATPase 1 [Source:MGI Symbol;Acc:MGI:106054]	Psmc1	protein_coding	0.324641	0.0498829	1.30205	0.441615	2032	2569	2290	1736	2779	1550	2127.55	0.165551	1.96097
ENSMUSG00000084022	predicted gene 16459 [Source:MGI Symbol;Acc:MGI:3644110]	Gm16459	processed_pseudogene	0.462235	0.0499119	1.3018	0.441634	63	64	64	39	43	33	51.2849	0.235748	1.96072
ENSMUSG00000053490	tripartite motif-containing 60 [Source:MGI Symbol;Acc:MGI:2387430]	Trim60	protein_coding	-0.231909	0.0500444	1.30064	0.442568	5196	5881	6745	7598	8260	8277	6847.76	0.118346	-1.95958
ENSMUSG00000084064	predicted gene 12079 [Source:MGI Symbol;Acc:MGI:3650745]	Gm12079	processed_pseudogene	0.387199	0.0501216	1.29998	0.443011	214	219	238	171	184	186	201.43	0.197659	1.95892
ENSMUSG00000028163	nuclear factor of kappa light polypeptide gene enhancer in B cells 1, p105 [Source:MGI Symbol;Acc:MGI:97312]	Nfkb1	protein_coding	0.456866	0.0502637	1.29875	0.443789	60	196	212	104	63	78	118.629	0.233367	1.95771
ENSMUSG00000092269	predicted gene 9577 [Source:MGI Symbol;Acc:MGI:3779986]	Gm9577	processed_pseudogene	0.297338	0.0502536	1.29883	0.443789	411	494	412	384	409	389	412.185	0.151874	1.9578
ENSMUSG00000001134	ubiquitously expressed prefoldin like chaperone [Source:MGI Symbol;Acc:MGI:1277988]	Uxt	protein_coding	0.451005	0.0504504	1.29714	0.444782	36	94	76	39	25	38	51.1795	0.23056	1.95613
ENSMUSG00000027652	Ral GTPase activating protein, beta subunit (non-catalytic) [Source:MGI Symbol;Acc:MGI:2444531]	Ralgapb	protein_coding	-0.312608	0.0504577	1.29707	0.444782	1344	2109	1821	1891	3175	2630	2089.64	0.159815	-1.95606
ENSMUSG00000024833	polymerase (DNA directed), alpha 2 [Source:MGI Symbol;Acc:MGI:99690]	Pola2	protein_coding	-0.273085	0.0504505	1.29713	0.444782	907	945	938	1264	1532	1139	1094.51	0.139605	-1.95612
ENSMUSG00000083228	predicted gene 11779 [Source:MGI Symbol;Acc:MGI:3650487]	Gm11779	processed_pseudogene	0.319521	0.0505074	1.29665	0.444981	24	24	22	6	6	0	14.1504	0.163384	1.95564
ENSMUSG00000032724	ankyrin repeat and BTB (POZ) domain containing 2 [Source:MGI Symbol;Acc:MGI:2139365]	Abtb2	protein_coding	-0.417802	0.0508121	1.29403	0.446806	17	57	223	240	311	408	199.908	0.213922	-1.95306
ENSMUSG00000029452	transmembrane protein 116 [Source:MGI Symbol;Acc:MGI:1924712]	Tmem116	protein_coding	-0.305673	0.0508236	1.29393	0.446806	369	577	422	629	688	644	538.798	0.156517	-1.95297
ENSMUSG00000029062	cyclin-dependent kinase 11B [Source:MGI Symbol;Acc:MGI:88353]	Cdk11b	protein_coding	-0.282811	0.0507519	1.29455	0.446806	1566	2582	2086	2509	3585	2686	2422.74	0.144766	-1.95357
ENSMUSG00000022070	bora, aurora kinase A activator [Source:MGI Symbol;Acc:MGI:1924994]	Bora	protein_coding	-0.17914	0.0507848	1.29427	0.446806	2536	3106	2536	3386	3520	3628	3051.75	0.0917116	-1.95329
ENSMUSG00000111901	predicted gene 6150 [Source:MGI Symbol;Acc:MGI:3779560]	Gm6150	transcribed_processed_pseudogene	-0.372828	0.0509095	1.2932	0.447081	566	1055	1156	1329	1644	1374	1149.35	0.190974	-1.95224
ENSMUSG00000063586	predicted pseudogene 5513 [Source:MGI Symbol;Acc:MGI:3645437]	Gm5513	processed_pseudogene	0.249186	0.0508935	1.29334	0.447081	11	13	20	0	0	0	7.7471	0.127632	1.95238
ENSMUSG00000015806	quinoid dihydropteridine reductase [Source:MGI Symbol;Acc:MGI:97836]	Qdpr	protein_coding	-0.309058	0.0509487	1.29287	0.447186	336	391	368	548	532	508	436.903	0.158336	-1.95191
ENSMUSG00000030663	RIKEN cDNA 1110004F10 gene [Source:MGI Symbol;Acc:MGI:1929274]	1110004F10Rik	protein_coding	0.459389	0.0510143	1.29231	0.447196	169	233	66	89	83	93	121.485	0.23542	1.95136
ENSMUSG00000063457	ribosomal protein S15 [Source:MGI Symbol;Acc:MGI:98117]	Rps15	protein_coding	0.431168	0.0510502	1.292	0.447196	243	253	187	206	145	143	196.495	0.220992	1.95106
ENSMUSG00000097434	predicted gene, 16630 [Source:MGI Symbol;Acc:MGI:4439554]	Gm16630	lincRNA	0.377238	0.051059	1.29193	0.447196	77	37	42	17	3	28	35.627	0.193358	1.95098
ENSMUSG00000028572	hook microtubule tethering protein 1 [Source:MGI Symbol;Acc:MGI:1925213]	Hook1	protein_coding	-0.359956	0.051032	1.29216	0.447196	917	888	1106	1143	2074	1371	1211.96	0.184478	-1.95121
ENSMUSG00000063239	glutamate receptor, metabotropic 4 [Source:MGI Symbol;Acc:MGI:1351341]	Grm4	protein_coding	0.22476	0.0510951	1.29162	0.447273	1372	1877	1469	1357	1745	1426	1515.12	0.115221	1.95068
ENSMUSG00000053565	eukaryotic translation initiation factor 3, subunit K [Source:MGI Symbol;Acc:MGI:1921080]	Eif3k	protein_coding	-0.299674	0.051124	1.29138	0.447287	1264	1618	1291	2267	1714	1952	1648.43	0.153644	-1.95044
ENSMUSG00000046756	mitchondrial ribosomal protein S7 [Source:MGI Symbol;Acc:MGI:1354367]	Mrps7	protein_coding	-0.210025	0.0512012	1.29072	0.447724	1402	1631	1380	1975	2030	1833	1671.88	0.107717	-1.94979
ENSMUSG00000026014	Ras association (RalGDS/AF-6) and pleckstrin homology domains 1 [Source:MGI Symbol;Acc:MGI:1924550]	Raph1	protein_coding	-0.452263	0.051255	1.29026	0.447729	33	175	139	206	431	202	185.831	0.232009	-1.94934
ENSMUSG00000074781	ubiquitin-conjugating enzyme E2N [Source:MGI Symbol;Acc:MGI:1934835]	Ube2n	protein_coding	0.378346	0.0513683	1.28931	0.447729	418	550	386	292	496	317	403.768	0.194184	1.94839
ENSMUSG00000115090	predicted gene, 49016 [Source:MGI Symbol;Acc:MGI:6118377]	Gm49016	antisense	-0.376921	0.0512849	1.29001	0.447729	5	5	6	29	20	19	13.4011	0.193383	-1.94909
ENSMUSG00000061322	dynein, axonemal, intermediate chain 1 [Source:MGI Symbol;Acc:MGI:1916172]	Dnaic1	protein_coding	-0.270117	0.0513822	1.28919	0.447729	0	0	4	17	73	12	15.8625	0.138644	-1.94827
ENSMUSG00000114466	predicted gene, 19216 [Source:MGI Symbol;Acc:MGI:5011401]	Gm19216	processed_pseudogene	0.257198	0.0513925	1.2891	0.447729	18	6	15	0	1	0	7.22822	0.132019	1.94819
ENSMUSG00000031831	dynein, axonemal assembly factor 1 [Source:MGI Symbol;Acc:MGI:1915520]	Dnaaf1	protein_coding	-0.249377	0.0513931	1.2891	0.447729	0	0	0	5	55	17	11.3596	0.128005	-1.94818
ENSMUSG00000029152	OCIA domain containing 1 [Source:MGI Symbol;Acc:MGI:1915345]	Ociad1	protein_coding	-0.243224	0.0513905	1.28912	0.447729	3027	4866	3226	4777	5488	4722	4225.62	0.124845	-1.9482
ENSMUSG00000005131	RIKEN cDNA 4930550C14 gene [Source:MGI Symbol;Acc:MGI:1922561]	4930550C14Rik	protein_coding	-0.390133	0.0515385	1.28787	0.448281	551	1149	577	1059	1548	1019	943.098	0.20038	-1.94697
ENSMUSG00000022742	coproporphyrinogen oxidase [Source:MGI Symbol;Acc:MGI:104841]	Cpox	protein_coding	-0.335448	0.0515231	1.288	0.448281	957	1363	1034	1474	2271	1286	1350.06	0.172281	-1.9471
ENSMUSG00000030994	DNA segment, Chr 7, ERATO Doi 443, expressed [Source:MGI Symbol;Acc:MGI:1196431]	D7Ertd443e	protein_coding	-0.318223	0.0515232	1.288	0.448281	1224	1762	1669	2144	2928	1771	1857.81	0.163435	-1.9471
ENSMUSG00000031993	sorting nexin 19 [Source:MGI Symbol;Acc:MGI:1921581]	Snx19	protein_coding	-0.455859	0.0515926	1.28741	0.448514	75	223	204	227	402	367	237.992	0.234192	-1.94652
ENSMUSG00000034591	solute carrier family 41, member 2 [Source:MGI Symbol;Acc:MGI:2442940]	Slc41a2	protein_coding	-0.342378	0.0516744	1.28672	0.448748	939	988	1129	1146	2077	1470	1252.21	0.175954	-1.94584
ENSMUSG00000102501	predicted gene, 37372 [Source:MGI Symbol;Acc:MGI:5610600]	Gm37372	TEC	-0.305765	0.0516604	1.28684	0.448748	2	0	7	19	44	24	14.8127	0.157128	-1.94595
ENSMUSG00000021814	annexin A7 [Source:MGI Symbol;Acc:MGI:88031]	Anxa7	protein_coding	-0.176963	0.0518001	1.28567	0.449602	12709	18892	14892	18855	21177	19516	17232.5	0.0909931	-1.94479
ENSMUSG00000113504	selenoprotein K, pseudogene 5 [Source:MGI Symbol;Acc:MGI:5012170]	Selenok-ps5	processed_pseudogene	0.422076	0.0519167	1.28469	0.450375	29	29	29	13	14	10	21.0015	0.217137	1.94382
ENSMUSG00000063787	coiled-coil-helix-coiled-coil-helix domain containing 1 [Source:MGI Symbol;Acc:MGI:1913371]	Chchd1	protein_coding	-0.398879	0.0520154	1.28387	0.450993	240	275	214	478	328	381	312.111	0.20529	-1.94301
ENSMUSG00000085066	predicted pseudogene 4989 [Source:MGI Symbol;Acc:MGI:3643860]	Gm4989	processed_pseudogene	0.40191	0.0521685	1.28259	0.451365	169	280	194	148	194	155	187.246	0.206984	1.94174
ENSMUSG00000025203	stearoyl-Coenzyme A desaturase 2 [Source:MGI Symbol;Acc:MGI:98240]	Scd2	protein_coding	0.322763	0.0521326	1.28289	0.451365	25	117	111	15	0	30	50.2364	0.166198	1.94204
ENSMUSG00000046603	T cell activation inhibitor, mitochondrial [Source:MGI Symbol;Acc:MGI:1196217]	Tcaim	protein_coding	-0.274338	0.0521674	1.2826	0.451365	1394	1463	1627	1850	2581	1929	1762.42	0.141284	-1.94175
ENSMUSG00000008393	calcium regulated heat stable protein 1 [Source:MGI Symbol;Acc:MGI:1196368]	Carhsp1	protein_coding	0.194018	0.0521242	1.28296	0.451365	4533	5107	4699	4039	5032	5124	4692.93	0.0999006	1.94211
ENSMUSG00000025722	WD repeat domain 73 [Source:MGI Symbol;Acc:MGI:1919218]	Wdr73	protein_coding	-0.285741	0.0522212	1.28215	0.451582	751	930	652	991	1314	1006	913.869	0.14719	-1.94131
ENSMUSG00000003346	abhydrolase domain containing 17A [Source:MGI Symbol;Acc:MGI:106388]	Abhd17a	protein_coding	-0.294701	0.052278	1.28168	0.451668	700	1100	1017	1342	1321	1333	1106.13	0.151842	-1.94084
ENSMUSG00000025243	solute carrier family 6 (neurotransmitter transporter), member 20B [Source:MGI Symbol;Acc:MGI:1336891]	Slc6a20b	protein_coding	-0.267111	0.0522863	1.28161	0.451668	483	633	539	713	770	814	642.412	0.137632	-1.94077
ENSMUSG00000083270	predicted gene 13498 [Source:MGI Symbol;Acc:MGI:3650381]	Gm13498	processed_pseudogene	0.437389	0.0523823	1.28082	0.452259	121	111	118	76	93	82	100.315	0.225461	1.93998
ENSMUSG00000028405	aconitase 1 [Source:MGI Symbol;Acc:MGI:87879]	Aco1	protein_coding	-0.276265	0.0524852	1.27996	0.452909	1461	1759	1820	1841	2808	2490	1974.53	0.142468	-1.93913
ENSMUSG00000035401	EMSY, BRCA2-interacting transcriptional repressor [Source:MGI Symbol;Acc:MGI:1924203]	Emsy	protein_coding	0.323806	0.0525508	1.27942	0.453237	1168	922	970	846	938	921	958.726	0.167032	1.93859
ENSMUSG00000021413	pre-mRNA processing factor 4B [Source:MGI Symbol;Acc:MGI:109584]	Prpf4b	protein_coding	-0.426404	0.0526339	1.27873	0.453343	425	332	225	460	798	502	441.61	0.220033	-1.93791
ENSMUSG00000022141	NIPBL cohesin loading factor [Source:MGI Symbol;Acc:MGI:1913976]	Nipbl	protein_coding	-0.410209	0.0526123	1.27891	0.453343	574	694	865	875	1871	922	929.81	0.211656	-1.93809
ENSMUSG00000055963	triple QxxK/R motif containing [Source:MGI Symbol;Acc:MGI:3650048]	Triqk	protein_coding	-0.298794	0.0526529	1.27858	0.453343	670	618	607	932	939	869	756.796	0.154196	-1.93776
ENSMUSG00000028556	dedicator of cytokinesis 7 [Source:MGI Symbol;Acc:MGI:1914549]	Dock7	protein_coding	-0.212713	0.0526738	1.27841	0.453343	2589	3523	3372	3771	4759	4068	3587.74	0.109783	-1.93759
ENSMUSG00000033948	zinc finger SWIM-type containing 5 [Source:MGI Symbol;Acc:MGI:1921714]	Zswim5	protein_coding	0.326846	0.0527016	1.27818	0.453345	442	663	597	431	492	549	522.431	0.168707	1.93736
ENSMUSG00000070605	zinc finger protein 992 [Source:MGI Symbol;Acc:MGI:3700963]	Zfp992	protein_coding	0.360794	0.0527717	1.2776	0.45371	24	15	17	4	8	4	12.4211	0.186285	1.93678
ENSMUSG00000020402	voltage-dependent anion channel 1 [Source:MGI Symbol;Acc:MGI:106919]	Vdac1	protein_coding	0.274911	0.052889	1.27663	0.454479	851	994	777	705	964	749	828.454	0.142012	1.93583
ENSMUSG00000028497	3-hydroxyacyl-CoA dehydratase 4 [Source:MGI Symbol;Acc:MGI:1914025]	Hacd4	protein_coding	0.42998	0.0529954	1.27576	0.455155	586	563	441	456	237	450	458.148	0.222217	1.93496
ENSMUSG00000026708	centromere protein L [Source:MGI Symbol;Acc:MGI:1917704]	Cenpl	protein_coding	-0.383635	0.0530345	1.27544	0.455252	400	434	497	617	1001	549	564.229	0.198298	-1.93464
ENSMUSG00000021569	thyroid hormone receptor interactor 13 [Source:MGI Symbol;Acc:MGI:1916966]	Trip13	protein_coding	0.454326	0.0530884	1.275	0.455476	467	185	466	244	298	194	315.256	0.234891	1.9342
ENSMUSG00000020163	ubiquinol-cytochrome c reductase, complex III subunit XI [Source:MGI Symbol;Acc:MGI:1913844]	Uqcr11	protein_coding	0.372652	0.0531939	1.27414	0.455666	567	687	594	609	397	488	555.562	0.19275	1.93334
ENSMUSG00000097804	predicted gene, 16685 [Source:MGI Symbol;Acc:MGI:4439609]	Gm16685	antisense	-0.31852	0.0531742	1.2743	0.455666	3	4	1	19	31	8	10.1897	0.164737	-1.9335
ENSMUSG00000038187	BTB (POZ) domain containing 10 [Source:MGI Symbol;Acc:MGI:1916065]	Btbd10	protein_coding	0.149598	0.0531785	1.27426	0.455666	6981	8198	7152	7120	8572	7151	7414.82	0.077373	1.93347
ENSMUSG00000064181	RAB3A interacting protein [Source:MGI Symbol;Acc:MGI:105933]	Rab3ip	protein_coding	-0.367133	0.0532582	1.27361	0.455978	295	573	419	649	613	713	526.741	0.189947	-1.93282
ENSMUSG00000020453	POZ (BTB) and AT hook containing zinc finger 1 [Source:MGI Symbol;Acc:MGI:1891832]	Patz1	protein_coding	-0.257797	0.0533167	1.27314	0.45624	1255	1912	1751	2039	2582	2153	1894.33	0.133411	-1.93235
ENSMUSG00000041245	WNK lysine deficient protein kinase 3 [Source:MGI Symbol;Acc:MGI:2652875]	Wnk3	protein_coding	-0.415729	0.0535296	1.27141	0.457823	15	33	67	86	221	58	75.0013	0.215334	-1.93062
ENSMUSG00000106738	predicted gene 5 [Source:MGI Symbol;Acc:MGI:2684851]	Gm5	lincRNA	-0.348281	0.0535736	1.27105	0.457897	685	648	662	1192	872	971	823.173	0.180431	-1.93027
ENSMUSG00000073733	REM2 and RAB-like small GTPase 1 [Source:MGI Symbol;Acc:MGI:1923416]	Rsg1	protein_coding	-0.245599	0.0535941	1.27088	0.457897	0	0	0	6	42	17	9.65638	0.127247	-1.9301
ENSMUSG00000029655	NEDD4 binding protein 2-like 2 [Source:MGI Symbol;Acc:MGI:2687207]	N4bp2l2	protein_coding	0.203915	0.0536426	1.27049	0.458073	2701	3314	2979	3001	2822	2937	2925.17	0.105671	1.92971
ENSMUSG00000024592	RIKEN cDNA C330018D20 gene [Source:MGI Symbol;Acc:MGI:1924672]	C330018D20Rik	protein_coding	-0.281842	0.0536868	1.27013	0.458211	941	1255	1256	1739	1694	1427	1352.86	0.146081	-1.92936
ENSMUSG00000031819	ER membrane protein complex subunit 8 [Source:MGI Symbol;Acc:MGI:1343095]	Emc8	protein_coding	-0.249524	0.0537149	1.26991	0.458212	2560	2762	2600	3792	3246	3797	3067.76	0.129346	-1.92913
ENSMUSG00000024238	zinc finger E-box binding homeobox 1 [Source:MGI Symbol;Acc:MGI:1344313]	Zeb1	protein_coding	0.451044	0.0538568	1.26876	0.458565	97	293	204	113	149	116	159.094	0.233946	1.92799
ENSMUSG00000033184	transmembrane p24 trafficking protein 7 [Source:MGI Symbol;Acc:MGI:1913926]	Tmed7	protein_coding	0.410808	0.0538284	1.26899	0.458565	366	284	409	250	246	321	314.346	0.213051	1.92822
ENSMUSG00000000378	cerebral cavernous malformation 2 [Source:MGI Symbol;Acc:MGI:2384924]	Ccm2	protein_coding	-0.338548	0.0539383	1.2681	0.458565	396	642	385	714	754	644	570.814	0.175657	-1.92733
ENSMUSG00000037257	alpha- and gamma-adaptin binding protein [Source:MGI Symbol;Acc:MGI:1914189]	Aagab	protein_coding	-0.322879	0.0538147	1.2691	0.458565	1046	2099	1497	2263	2167	2290	1836.07	0.16744	-1.92832
ENSMUSG00000034875	nudix (nucleoside diphosphate linked moiety X)-type motif 19 [Source:MGI Symbol;Acc:MGI:94203]	Nudt19	protein_coding	-0.306144	0.0539427	1.26807	0.458565	301	361	354	479	500	493	404.766	0.158846	-1.9273
ENSMUSG00000094152	solute carrier family 6, member 16 [Source:MGI Symbol;Acc:MGI:2685930]	Slc6a16	protein_coding	-0.24552	0.053883	1.26855	0.458565	0	0	0	15	13	21	7.58876	0.127359	-1.92778
ENSMUSG00000000088	cytochrome c oxidase subunit 5A [Source:MGI Symbol;Acc:MGI:88474]	Cox5a	protein_coding	0.219156	0.0539521	1.26799	0.458565	1664	1896	1517	1525	1864	1526	1642.64	0.113716	1.92722
ENSMUSG00000032680	RIKEN cDNA 6820408C15 gene [Source:MGI Symbol;Acc:MGI:3045333]	6820408C15Rik	protein_coding	-0.453918	0.0540993	1.26681	0.458864	50	154	68	181	228	146	130.986	0.235674	-1.92604
ENSMUSG00000029149	keratinocyte associated protein 3 [Source:MGI Symbol;Acc:MGI:1917065]	Krtcap3	protein_coding	-0.377896	0.0540855	1.26692	0.458864	233	402	262	506	418	475	371.393	0.196192	-1.92615
ENSMUSG00000031357	synapse associated protein 1 [Source:MGI Symbol;Acc:MGI:1914293]	Syap1	protein_coding	-0.375304	0.0540738	1.26701	0.458864	3	47	24	38	165	89	56.0012	0.194837	-1.92625
ENSMUSG00000048732	kelch-like 11 [Source:MGI Symbol;Acc:MGI:2388648]	Klhl11	protein_coding	-0.269816	0.0540858	1.26692	0.458864	3	0	0	18	31	16	10.4624	0.140081	-1.92615
ENSMUSG00000087325	predicted pseudogene 6038 [Source:MGI Symbol;Acc:MGI:3643766]	Gm6038	processed_pseudogene	0.333288	0.0541787	1.26617	0.4593	31	19	9	6	2	5	12.5527	0.1731	1.9254
ENSMUSG00000037876	jumonji domain containing 1C [Source:MGI Symbol;Acc:MGI:1918614]	Jmjd1c	protein_coding	0.445332	0.0543066	1.26515	0.459671	266	121	80	72	121	62	122.903	0.231416	1.92438
ENSMUSG00000115358	predicted gene, 49138 [Source:MGI Symbol;Acc:MGI:6118550]	Gm49138	processed_pseudogene	0.444314	0.0542861	1.26531	0.459671	56	52	72	26	23	45	46.3838	0.230867	1.92455
ENSMUSG00000003824	synaptonemal complex central element protein 2 [Source:MGI Symbol;Acc:MGI:1919096]	Syce2	protein_coding	-0.184526	0.0542773	1.26538	0.459671	9077	10670	8061	11919	12858	11251	10404.3	0.0958768	-1.92462
ENSMUSG00000071302	RIKEN cDNA 2610044O15 gene [Source:MGI Symbol;Acc:MGI:1919389]	2610044O15Rik8	protein_coding	-0.453133	0.0545395	1.26329	0.461305	44	31	45	77	111	78	62.0627	0.235696	-1.92253
ENSMUSG00000029086	prominin 1 [Source:MGI Symbol;Acc:MGI:1100886]	Prom1	protein_coding	-0.356308	0.0546361	1.26252	0.461305	279	476	458	565	630	660	496.052	0.185407	-1.92176
ENSMUSG00000030876	methyltransferase like 9 [Source:MGI Symbol;Acc:MGI:1914862]	Mettl9	protein_coding	-0.316917	0.0546043	1.26277	0.461305	767	1213	725	1380	1253	1269	1070.18	0.164888	-1.92201
ENSMUSG00000070610	predicted gene 13127 [Source:MGI Symbol;Acc:MGI:3651260]	Gm13127	processed_pseudogene	0.274627	0.0546011	1.2628	0.461305	753	906	807	773	700	782	779.835	0.142883	1.92204
ENSMUSG00000019832	RAB32, member RAS oncogene family [Source:MGI Symbol;Acc:MGI:1915094]	Rab32	protein_coding	-0.245889	0.0546405	1.26249	0.461305	1837	1970	1600	2612	2459	2308	2087.44	0.127952	-1.92172
ENSMUSG00000032026	RNA exonuclease 2 [Source:MGI Symbol;Acc:MGI:1888981]	Rexo2	protein_coding	-0.298609	0.0547335	1.26175	0.461853	409	617	504	752	738	690	602.022	0.155446	-1.92099
ENSMUSG00000026872	zinc finger E-box binding homeobox 2 [Source:MGI Symbol;Acc:MGI:1344407]	Zeb2	protein_coding	0.322234	0.0547739	1.26143	0.461955	102	84	3	5	25	9	38.9038	0.167772	1.92067
ENSMUSG00000026640	plexin A2 [Source:MGI Symbol;Acc:MGI:107684]	Plxna2	protein_coding	-0.34503	0.0548049	1.26118	0.461979	542	438	575	718	881	799	644.201	0.179664	-1.92042
ENSMUSG00000041966	DDB1 and CUL4 associated factor 17 [Source:MGI Symbol;Acc:MGI:1923013]	Dcaf17	protein_coding	0.382441	0.0549108	1.26034	0.462634	1079	988	636	725	620	826	811.284	0.199231	1.91958
ENSMUSG00000075225	coiled-coil domain containing 162 [Source:MGI Symbol;Acc:MGI:1923223]	Ccdc162	protein_coding	0.405626	0.0550191	1.25949	0.462867	364	302	242	242	266	197	268.841	0.211404	1.91873
ENSMUSG00000028790	KH domain containing, RNA binding, signal transduction associated 1 [Source:MGI Symbol;Acc:MGI:893579]	Khdrbs1	protein_coding	0.342941	0.0549954	1.25967	0.462867	392	395	464	359	379	334	385.587	0.178717	1.91891
ENSMUSG00000040451	sphingomyelin synthase 1 [Source:MGI Symbol;Acc:MGI:2444110]	Sgms1	protein_coding	-0.314339	0.0550232	1.25945	0.462867	768	1348	1102	1486	1439	1717	1273.36	0.16383	-1.91869
ENSMUSG00000103845	predicted gene, 19026 [Source:MGI Symbol;Acc:MGI:5011211]	Gm19026	processed_pseudogene	0.370919	0.0551639	1.25835	0.463812	312	379	452	259	337	345	344.928	0.193431	1.91758
ENSMUSG00000038515	GH regulated TBC protein 1 [Source:MGI Symbol;Acc:MGI:1914040]	Grtp1	protein_coding	-0.443839	0.0551945	1.2581	0.463832	19	29	54	80	88	83	56.5783	0.231487	-1.91734
ENSMUSG00000038151	PR domain containing 1, with ZNF domain [Source:MGI Symbol;Acc:MGI:99655]	Prdm1	protein_coding	-0.344675	0.0552678	1.25753	0.46421	711	801	536	780	1316	1036	835.432	0.179821	-1.91677
ENSMUSG00000025473	a disintegrin and metallopeptidase domain 8 [Source:MGI Symbol;Acc:MGI:107825]	Adam8	protein_coding	0.448426	0.055306	1.25723	0.464293	136	249	266	84	207	137	177.727	0.233986	1.91646
ENSMUSG00000051184	zinc finger protein 524 [Source:MGI Symbol;Acc:MGI:1916740]	Zfp524	protein_coding	-0.421968	0.0553876	1.25659	0.464378	93	94	77	156	153	153	117.667	0.220254	-1.91582
ENSMUSG00000061244	exocyst complex component 5 [Source:MGI Symbol;Acc:MGI:2145645]	Exoc5	protein_coding	-0.340561	0.0553625	1.25678	0.464378	329	483	493	691	632	633	529.79	0.177744	-1.91602
ENSMUSG00000031996	amyloid beta (A4) precursor-like protein 2 [Source:MGI Symbol;Acc:MGI:88047]	Aplp2	protein_coding	-0.30027	0.0554011	1.25648	0.464378	1190	2021	1647	1936	2309	2689	1907.2	0.15674	-1.91572
ENSMUSG00000030697	protein phosphatase 4, catalytic subunit [Source:MGI Symbol;Acc:MGI:1891763]	Ppp4c	protein_coding	-0.228729	0.0554428	1.25615	0.464489	1269	1898	1408	2000	2097	2005	1733.66	0.119416	-1.91539
ENSMUSG00000036962	cilia and flagella associated protein 221 [Source:MGI Symbol;Acc:MGI:2684947]	Cfap221	protein_coding	-0.43982	0.0555368	1.25542	0.464564	42	22	24	59	109	62	50.7497	0.229713	-1.91465
ENSMUSG00000037674	regulatory factor X, 7 [Source:MGI Symbol;Acc:MGI:2442675]	Rfx7	protein_coding	-0.32648	0.0554974	1.25573	0.464564	609	785	885	1156	1303	930	920.069	0.170489	-1.91496
ENSMUSG00000046589	leucine rich repeat containing 8 family, member E [Source:MGI Symbol;Acc:MGI:1919517]	Lrrc8e	protein_coding	-0.255459	0.0555227	1.25553	0.464564	2084	2143	1674	2567	2640	2937	2291.18	0.133416	-1.91476
ENSMUSG00000026049	testis expressed 30 [Source:MGI Symbol;Acc:MGI:1922873]	Tex30	protein_coding	-0.285939	0.0556206	1.25476	0.465028	2226	2540	1774	3226	2718	3274	2569.95	0.149394	-1.914
ENSMUSG00000091105	mRNA turnover 4, pseudogene 2 [Source:MGI Symbol;Acc:MGI:3779507]	Mrto4-ps2	processed_pseudogene	0.450145	0.0556588	1.25447	0.46511	76	118	77	57	72	41	72.9021	0.235223	1.9137
ENSMUSG00000117262	F-box protein 34 (Fbxo34) pseudogene	CT010445.2	processed_pseudogene	0.352137	0.055806	1.25332	0.466102	79	56	43	22	1	25	39.2206	0.184119	1.91255
ENSMUSG00000020137	THAP domain containing, apoptosis associated protein 2 [Source:MGI Symbol;Acc:MGI:1914066]	Thap2	protein_coding	-0.362215	0.0558519	1.25296	0.466248	4	7	27	43	99	29	32.5225	0.189424	-1.91219
ENSMUSG00000020553	phosphatidylcholine transfer protein [Source:MGI Symbol;Acc:MGI:107375]	Pctp	protein_coding	0.442561	0.0559267	1.25238	0.466635	40	74	43	29	22	30	39.5328	0.231512	1.91161
ENSMUSG00000030763	leucine carboxyl methyltransferase 1 [Source:MGI Symbol;Acc:MGI:1353593]	Lcmt1	protein_coding	-0.361662	0.0560219	1.25164	0.467191	305	550	401	493	767	680	513.197	0.189266	-1.91087
ENSMUSG00000006763	serum amyloid A-like 1 [Source:MGI Symbol;Acc:MGI:1926185]	Saal1	protein_coding	0.448377	0.0560589	1.25136	0.467262	142	109	215	112	92	99	129.976	0.234681	1.91058
ENSMUSG00000111451	predicted gene, 47321 [Source:MGI Symbol;Acc:MGI:6096205]	Gm47321	processed_pseudogene	-0.382115	0.0562071	1.25021	0.4681	3	24	14	35	75	39	29.4214	0.200121	-1.90943
ENSMUSG00000115366	predicted gene 9298 [Source:MGI Symbol;Acc:MGI:3648083]	Gm9298	processed_pseudogene	0.23972	0.0562165	1.25014	0.4681	14	10	18	0	0	0	7.48903	0.125551	1.90935
ENSMUSG00000063931	peptidase D [Source:MGI Symbol;Acc:MGI:97542]	Pepd	protein_coding	-0.272937	0.0563127	1.24939	0.468663	0	0	6	32	36	26	15.5449	0.143003	-1.90861
ENSMUSG00000032425	zinc finger protein 949 [Source:MGI Symbol;Acc:MGI:1918890]	Zfp949	protein_coding	0.442111	0.0563959	1.24875	0.469116	154	113	93	65	30	96	93.7109	0.231719	1.90796
ENSMUSG00000048996	olfactory receptor 1366 [Source:MGI Symbol;Acc:MGI:3031200]	Olfr1366	protein_coding	-0.288052	0.0564387	1.24842	0.469234	0	1	8	20	56	22	16.3457	0.151	-1.90763
ENSMUSG00000025962	FAST kinase domains 2 [Source:MGI Symbol;Acc:MGI:1922869]	Fastkd2	protein_coding	-0.380002	0.0564974	1.24797	0.469251	397	501	653	910	694	867	655.708	0.199248	-1.90718
ENSMUSG00000044950	PWWP domain containing 2A [Source:MGI Symbol;Acc:MGI:1918052]	Pwwp2a	protein_coding	-0.250575	0.056498	1.24797	0.469251	667	752	654	817	1063	978	801.496	0.131385	-1.90717
ENSMUSG00000028070	NAD(P)HX epimerase [Source:MGI Symbol;Acc:MGI:2180167]	Naxe	protein_coding	-0.265426	0.0565493	1.24757	0.469439	659	998	715	1081	1145	1044	914.735	0.139201	-1.90678
ENSMUSG00000038335	TSR1 20S rRNA accumulation [Source:MGI Symbol;Acc:MGI:2144566]	Tsr1	protein_coding	-0.449154	0.0566257	1.24699	0.469464	58	99	42	111	120	175	96.7254	0.235629	-1.90619
ENSMUSG00000023571	C1q and tumor necrosis factor related 12 [Source:MGI Symbol;Acc:MGI:1914639]	C1qtnf12	protein_coding	-0.302809	0.0566304	1.24695	0.469464	496	815	595	899	875	944	749.206	0.158859	-1.90615
ENSMUSG00000078317	factor 8-associated gene A [Source:MGI Symbol;Acc:MGI:95474]	F8a	protein_coding	0.208629	0.0566382	1.24689	0.469464	1847	2022	1699	1619	2047	1782	1811.6	0.109454	1.90609
ENSMUSG00000105031	predicted gene 3511 [Source:MGI Symbol;Acc:MGI:3781688]	Gm3511	processed_pseudogene	0.326385	0.0567671	1.2459	0.470294	16	24	22	1	10	3	12.8447	0.171322	1.9051
ENSMUSG00000003032	Kruppel-like factor 4 (gut) [Source:MGI Symbol;Acc:MGI:1342287]	Klf4	protein_coding	0.424776	0.0568683	1.24513	0.470365	108	39	60	36	23	40	52.9634	0.223059	1.90432
ENSMUSG00000033799	family with sequence similarity 208, member B [Source:MGI Symbol;Acc:MGI:2145274]	Fam208b	protein_coding	-0.373213	0.0568579	1.24521	0.470365	678	571	863	930	1480	1011	896.773	0.195974	-1.9044
ENSMUSG00000021712	tripartite motif-containing 23 [Source:MGI Symbol;Acc:MGI:1933161]	Trim23	protein_coding	0.371048	0.0568904	1.24496	0.470365	485	433	542	335	390	481	443.834	0.194862	1.90415
ENSMUSG00000011254	tRNA-histidine guanylyltransferase 1-like (S. cerevisiae) [Source:MGI Symbol;Acc:MGI:1913878]	Thg1l	protein_coding	-0.335161	0.0568641	1.24516	0.470365	263	317	268	458	406	402	344.009	0.175997	-1.90435
ENSMUSG00000061613	U2 small nuclear ribonucleoprotein auxiliary factor (U2AF) 1 [Source:MGI Symbol;Acc:MGI:98884]	U2af1	protein_coding	0.394488	0.0569831	1.24425	0.470427	290	353	276	215	328	182	270.989	0.20725	1.90344
ENSMUSG00000114500	predicted gene 8983 [Source:MGI Symbol;Acc:MGI:3644468]	Gm8983	processed_pseudogene	0.393264	0.0569437	1.24455	0.470427	21	35	33	12	6	15	20.5993	0.206574	1.90374
ENSMUSG00000081673	predicted gene 14794 [Source:MGI Symbol;Acc:MGI:3645637]	Gm14794	processed_pseudogene	0.349255	0.056984	1.24425	0.470427	18	25	15	2	8	6	12.4569	0.183487	1.90343
ENSMUSG00000046167	gliomedin [Source:MGI Symbol;Acc:MGI:2388361]	Gldn	protein_coding	-0.239597	0.0570727	1.24357	0.470922	0	0	0	34	6	19	9.39083	0.125921	-1.90275
ENSMUSG00000020346	mannoside acetylglucosaminyltransferase 1 [Source:MGI Symbol;Acc:MGI:96973]	Mgat1	protein_coding	-0.325495	0.0571484	1.243	0.471309	548	800	793	1075	924	1148	860.226	0.171117	-1.90217
ENSMUSG00000090334	predicted gene 17149 [Source:MGI Symbol;Acc:MGI:4937976]	Gm17149	processed_pseudogene	0.399395	0.0572831	1.24197	0.471759	22	27	24	8	11	10	17.1979	0.210081	1.90114
ENSMUSG00000009035	transmembrane protein 184b [Source:MGI Symbol;Acc:MGI:2445179]	Tmem184b	protein_coding	-0.30188	0.0572844	1.24196	0.471759	1100	1855	1706	1857	2364	2472	1836.08	0.158789	-1.90113
ENSMUSG00000032018	sterol-C5-desaturase [Source:MGI Symbol;Acc:MGI:1353611]	Sc5d	protein_coding	-0.205557	0.0572894	1.24193	0.471759	1797	2286	1737	2546	2770	2341	2192.87	0.108126	-1.9011
ENSMUSG00000032376	ubiquitin specific peptidase 3 [Source:MGI Symbol;Acc:MGI:2152450]	Usp3	protein_coding	-0.240237	0.057405	1.24105	0.472474	2744	3720	3114	4252	3863	4800	3665.17	0.126427	-1.90021
ENSMUSG00000043183	SUMO-interacting motifs containing 1 [Source:MGI Symbol;Acc:MGI:2442599]	Simc1	protein_coding	-0.396967	0.057469	1.24057	0.472609	7	56	48	51	200	112	73.245	0.20896	-1.89973
ENSMUSG00000024507	hydroxysteroid (17-beta) dehydrogenase 4 [Source:MGI Symbol;Acc:MGI:105089]	Hsd17b4	protein_coding	-0.261186	0.0574791	1.24049	0.472609	1621	1923	1382	2104	2756	1985	1908.6	0.137492	-1.89965
ENSMUSG00000018160	mediator complex subunit 1 [Source:MGI Symbol;Acc:MGI:1100846]	Med1	protein_coding	-0.285221	0.0575897	1.23966	0.473281	1427	2651	1846	2507	3144	2657	2295.37	0.15021	-1.89881
ENSMUSG00000001666	D-dopachrome tautomerase [Source:MGI Symbol;Acc:MGI:1298381]	Ddt	protein_coding	0.405442	0.0577615	1.23836	0.473896	283	276	239	246	205	159	234.793	0.213671	1.8975
ENSMUSG00000086959	RIKEN cDNA E330010L02 gene [Source:MGI Symbol;Acc:MGI:3041230]	E330010L02Rik	lincRNA	0.366776	0.0576976	1.23884	0.473896	23	17	29	8	4	10	15.7288	0.193244	1.89799
ENSMUSG00000027375	myelin and lymphocyte protein, T cell differentiation protein [Source:MGI Symbol;Acc:MGI:892970]	Mal	protein_coding	-0.238519	0.0577302	1.2386	0.473896	0	0	0	7	42	13	9.19955	0.125686	-1.89774
ENSMUSG00000032412	ATPase, Na+/K+ transporting, beta 3 polypeptide [Source:MGI Symbol;Acc:MGI:107788]	Atp1b3	protein_coding	0.162964	0.0577802	1.23822	0.473896	3690	5076	4204	4132	4708	4210	4264.55	0.08589	1.89736
ENSMUSG00000059422	predicted gene 8116 [Source:MGI Symbol;Acc:MGI:3648797]	Gm8116	processed_pseudogene	0.325688	0.0579186	1.23718	0.474556	321	404	374	313	303	335	338.844	0.171748	1.89631
[truncated: 52,447 more rows]

## Sheet: P adj < 0.05
GeneID	Gene description	Gene name	Gene type	log2(FC)	P-value	(-Log10(P-value)	P-adj	KO1	KO2	KO3	HET1	HET2	HET3	Base mean	StdErr	Wald-Stats
ENSMUSG00000001642	aldo-keto reductase family 1, member B3 (aldose reductase) [Source:MGI Symbol;Acc:MGI:1353494]	Akr1b3	protein_coding	4.34209	1.32424e-148	147.878	2.17003e-144	1232	1549	1185	45	39	40	710.324	0.167247	25.9622
ENSMUSG00000035399	oxidative stress responsive serine rich 1 [Source:MGI Symbol;Acc:MGI:1913930]	Oser1	protein_coding	2.63911	1.41995e-133	132.848	1.16344e-129	4334	5767	4498	765	910	711	2907.13	0.107301	24.5953
ENSMUSG00000083899	predicted gene 12346 [Source:MGI Symbol;Acc:MGI:3649810]	Gm12346	transcribed_processed_pseudogene	2.50312	2.50222e-118	117.602	1.36679e-114	4921	5953	4925	839	1148	878	3197.65	0.108235	23.1266
ENSMUSG00000084133	predicted gene 12856 [Source:MGI Symbol;Acc:MGI:3649664]	Gm12856	processed_pseudogene	3.34051	5.64036e-96	95.2487	2.31072e-92	1014	1278	996	88	79	85	612.046	0.160699	20.7873
ENSMUSG00000096276	predicted gene 2042 [Source:MGI Symbol;Acc:MGI:3800544]	Gm2042	protein_coding	2.75396	6.19299e-83	82.2081	2.02969e-79	1148	1537	1435	171	208	177	803.927	0.142747	19.2926
ENSMUSG00000089999	predicted gene 6485 [Source:MGI Symbol;Acc:MGI:3644007]	Gm6485	transcribed_processed_pseudogene	4.12613	8.46165e-82	81.0725	2.31102e-78	501	564	510	3	5	8	278.314	0.215385	19.157
ENSMUSG00000086583	predicted pseudogene 15500 [Source:MGI Symbol;Acc:MGI:3782947]	Gm15500	transcribed_processed_pseudogene	3.1858	4.41811e-75	74.3548	1.03428e-71	666	911	696	53	67	60	422.768	0.173763	18.3342
ENSMUSG00000096576	oogenesin 1 [Source:MGI Symbol;Acc:MGI:2679150]	Oog1	protein_coding	2.96497	1.05494e-71	70.9768	2.16091e-68	1453	1593	1239	155	127	153	817.341	0.165583	17.9062
ENSMUSG00000083283	predicted pseudogene 15361 [Source:MGI Symbol;Acc:MGI:3642247]	Gm15361	processed_pseudogene	3.19516	5.82987e-71	70.2343	1.06149e-67	677	802	675	57	49	55	401.356	0.179395	17.8108
ENSMUSG00000021270	heat shock protein 90, alpha (cytosolic), class A member 1 [Source:MGI Symbol;Acc:MGI:96250]	Hsp90aa1	protein_coding	2.17257	3.95301e-67	66.4031	6.4778e-64	6256	7452	6398	1318	1896	1280	4201.23	0.125509	17.31
ENSMUSG00000084353	predicted gene 15452 [Source:MGI Symbol;Acc:MGI:3768636]	Gm15452	processed_pseudogene	3.54683	1.73011e-65	64.7619	2.5774e-62	534	610	449	20	19	15	286.623	0.207526	17.0911
ENSMUSG00000091989	NADH:ubiquinone oxidoreductase subunit AB1b [Source:MGI Symbol;Acc:MGI:4936891]	Ndufab1-ps	processed_pseudogene	3.53838	2.16936e-61	60.6637	2.96244e-58	405	497	397	14	12	9	232.06	0.214036	16.5317
[truncated: 673 more rows]

## Sheet: GO biological process
Analysis Type:	PANTHER Overrepresentation Test (Released 20210224)
[truncated: 177 more rows]
